# Supplementary material for: Multiple polarity kinases inhibit phase separation of F-BAR protein Cdc15 and antagonize cytokinetic ring assembly in fission yeast
Source: eLife journal article supplement (doi:10.7554/elife.83062), 2023-01-16

Figure 1A

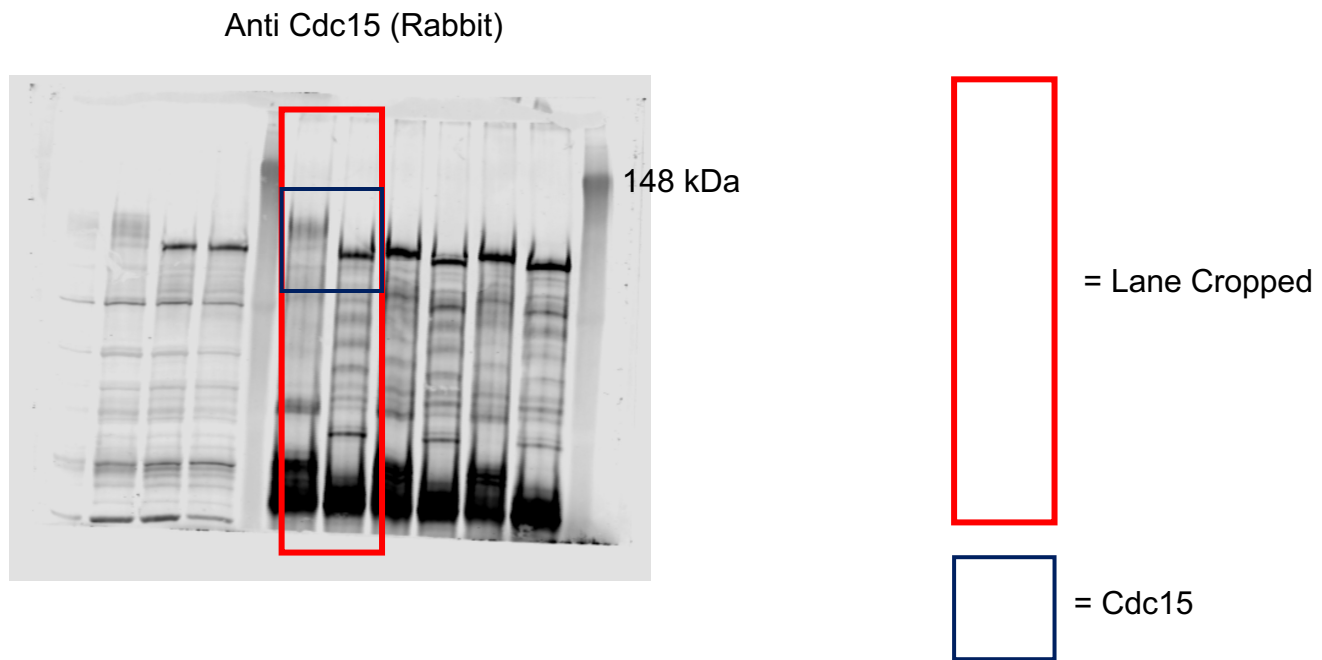

Figure 1B

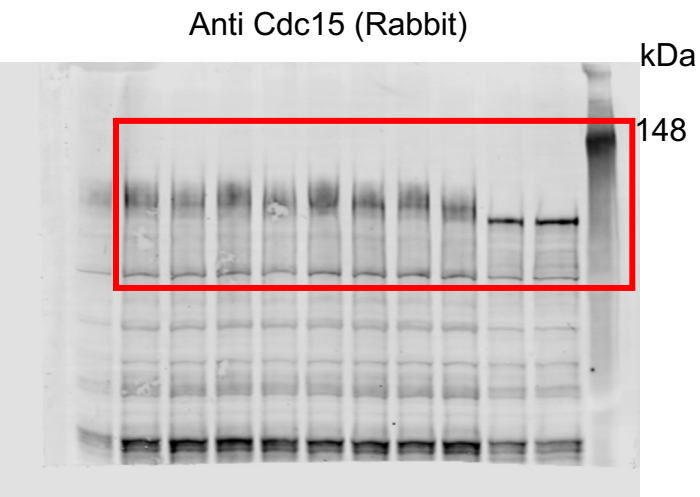

= Cdc15

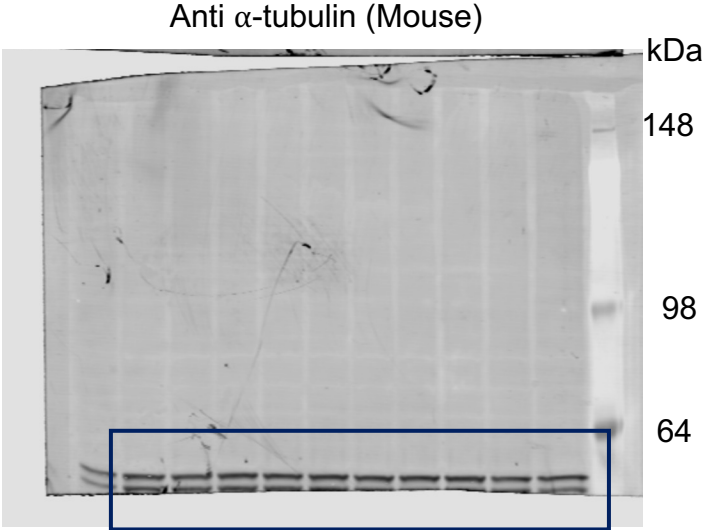

=  $\alpha$ -tubulin

Figure 1C

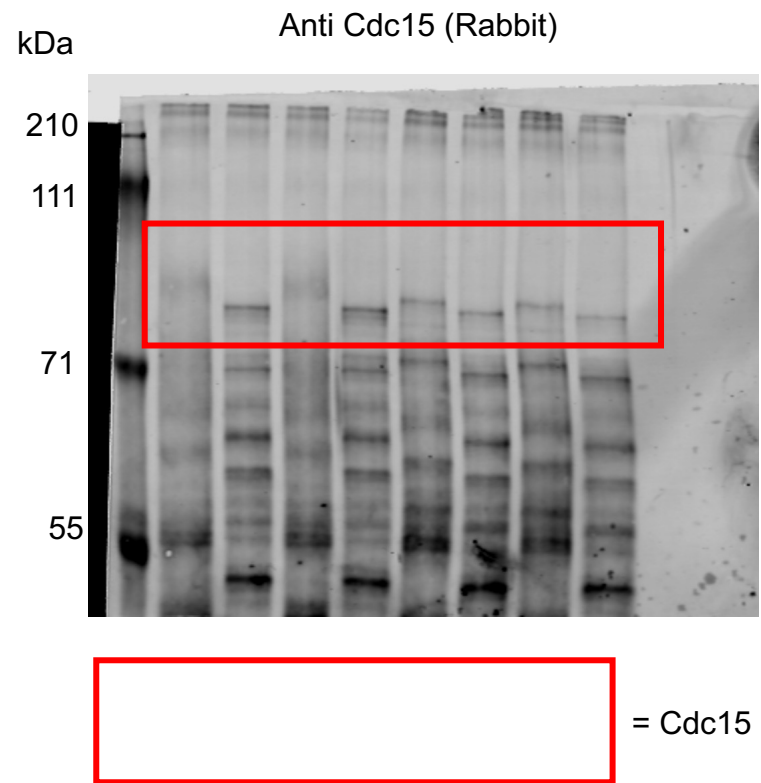

Figure 1D

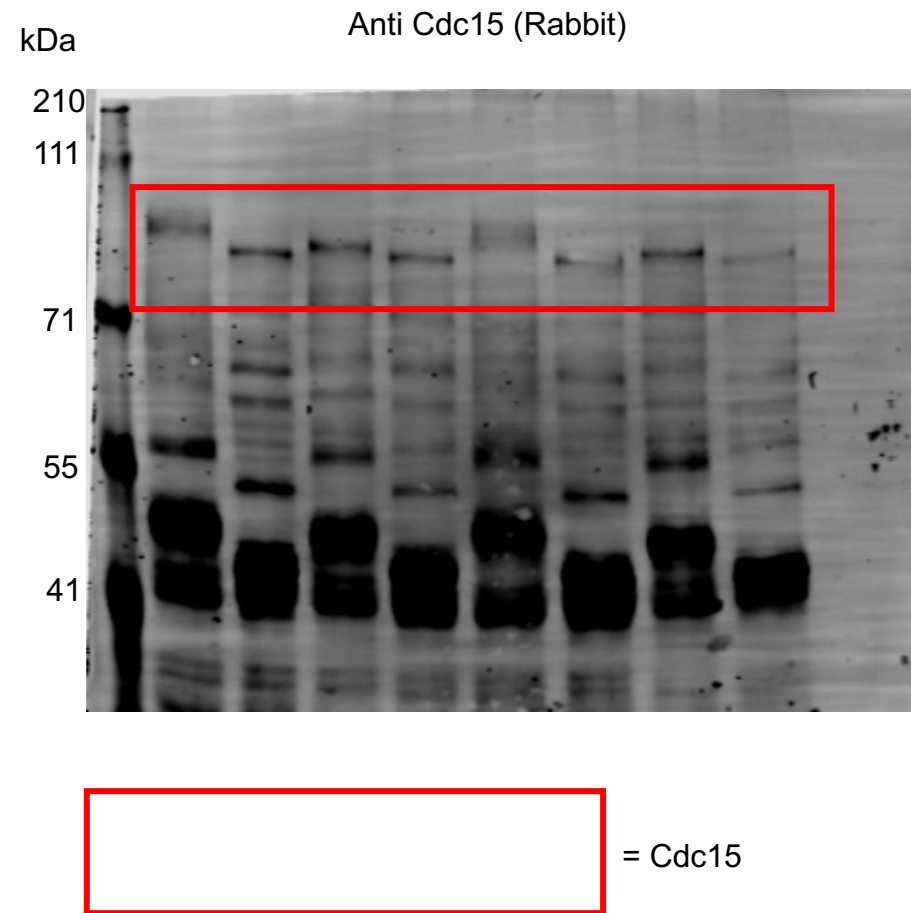

Figure 1E

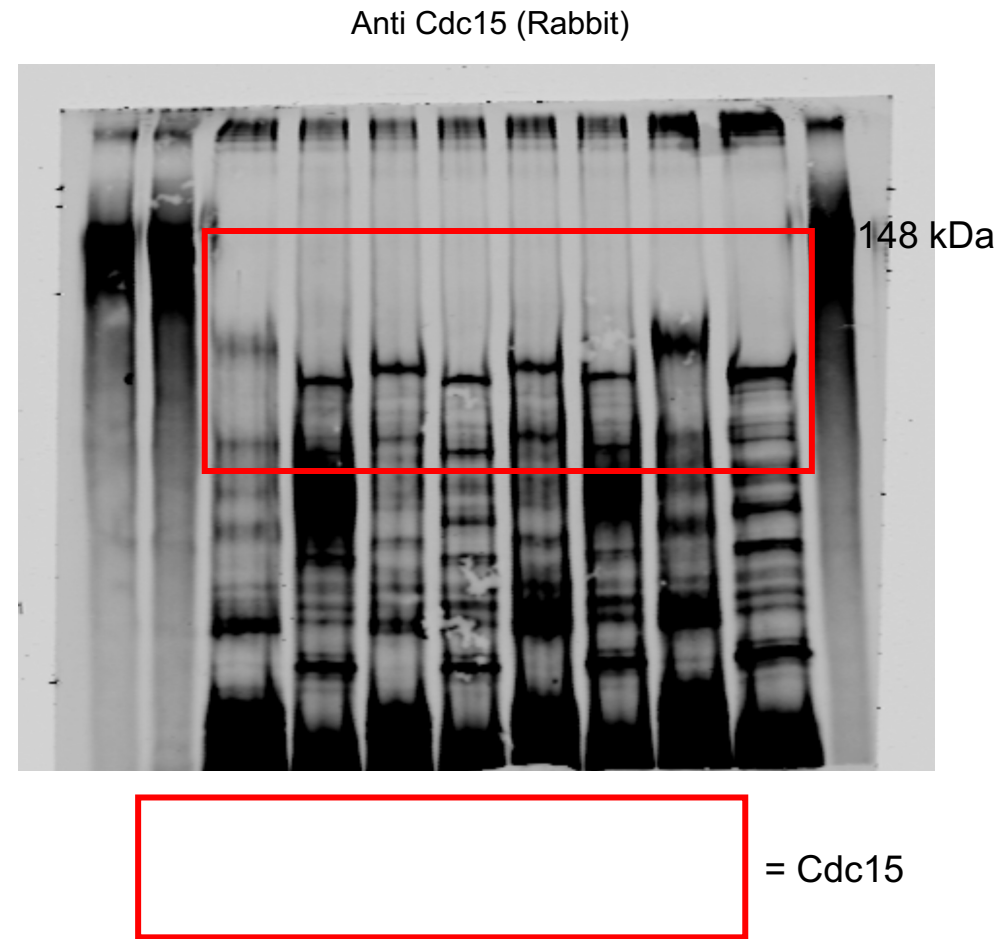

Figure 1F

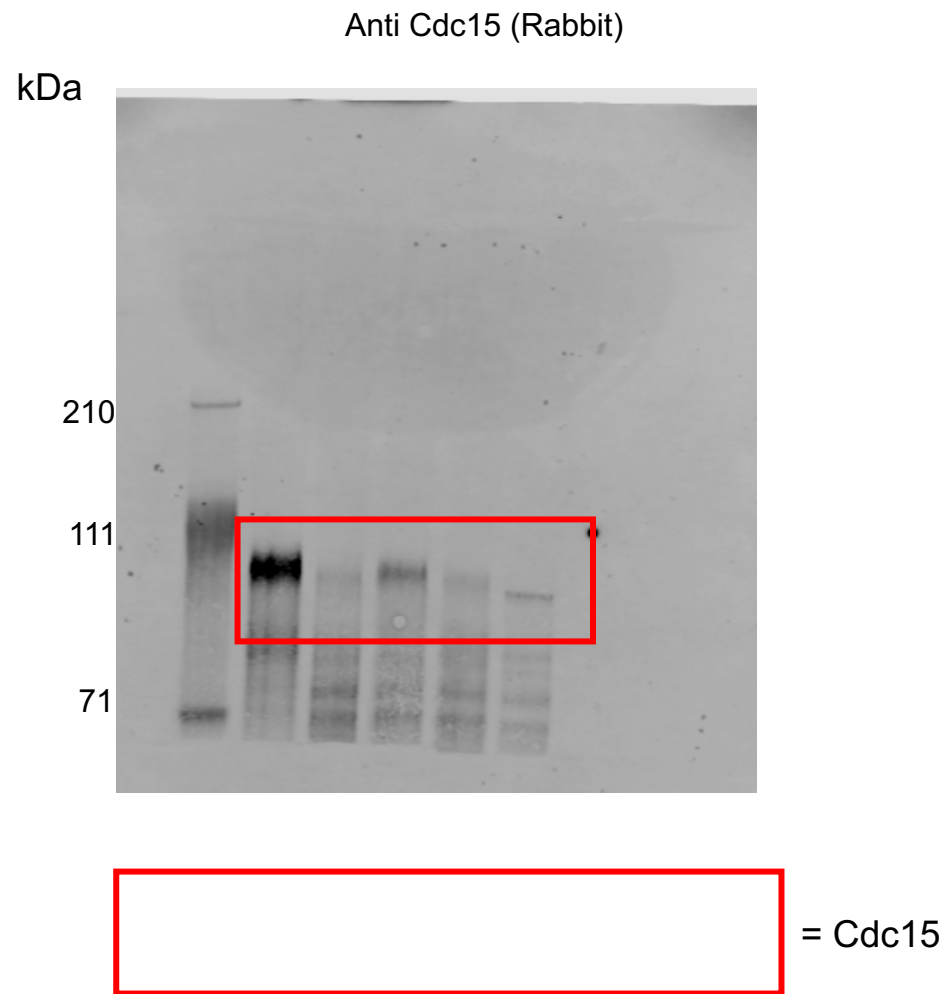

Figure 1G

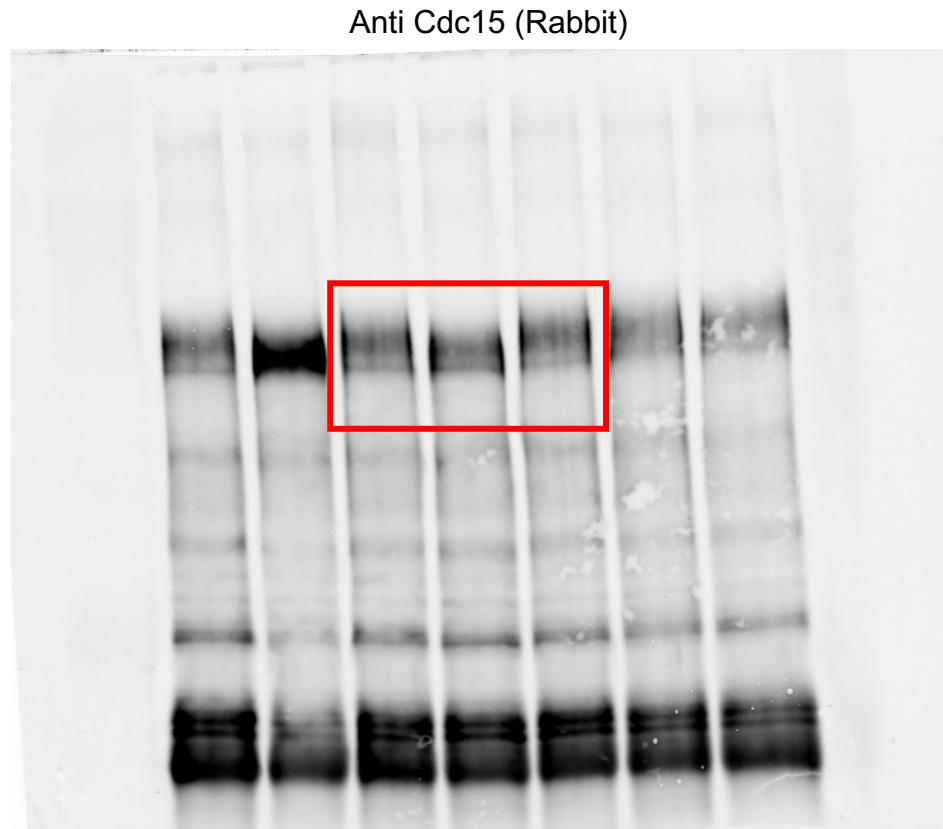

= Cdc15

Figure 1H

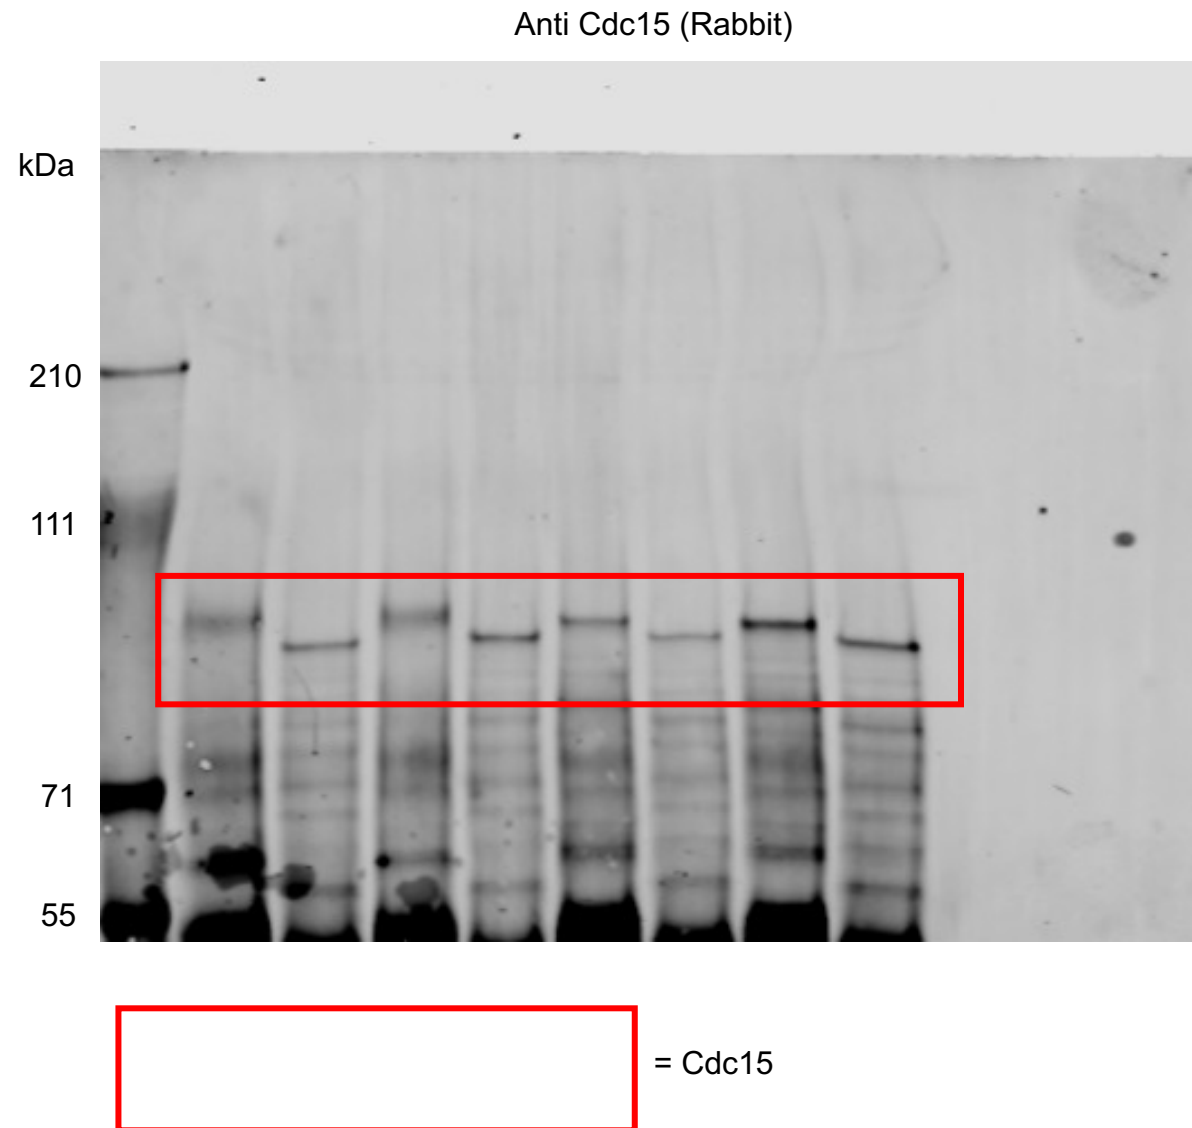



Figure 11

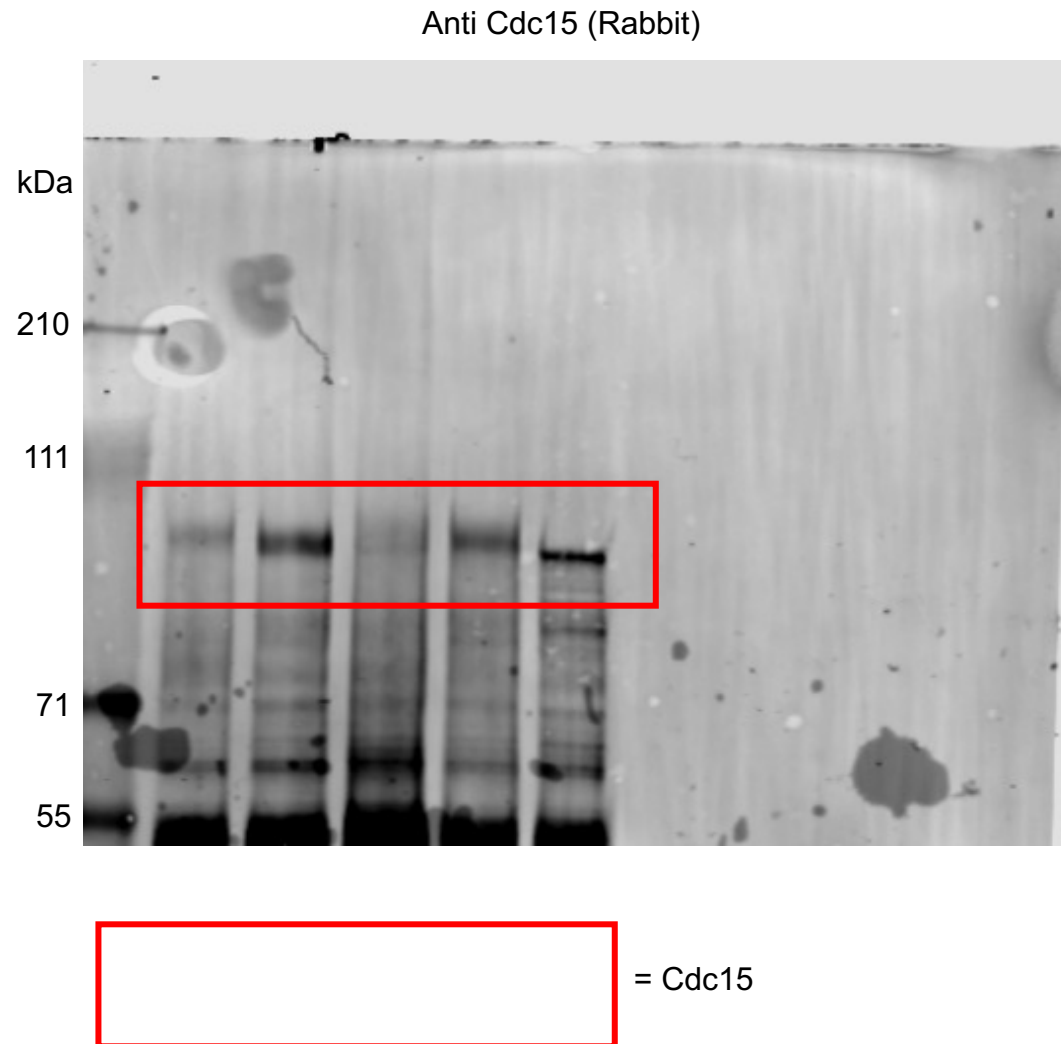

Supplement: fig1-data1 [file elife-83062-fig1-data1-v1.zip]
