# Supplementary material for: Multiple polarity kinases inhibit phase separation of F-BAR protein Cdc15 and antagonize cytokinetic ring assembly in fission yeast
Source: eLife journal article supplement (doi:10.7554/elife.83062), 2023-01-16

Figure-2A

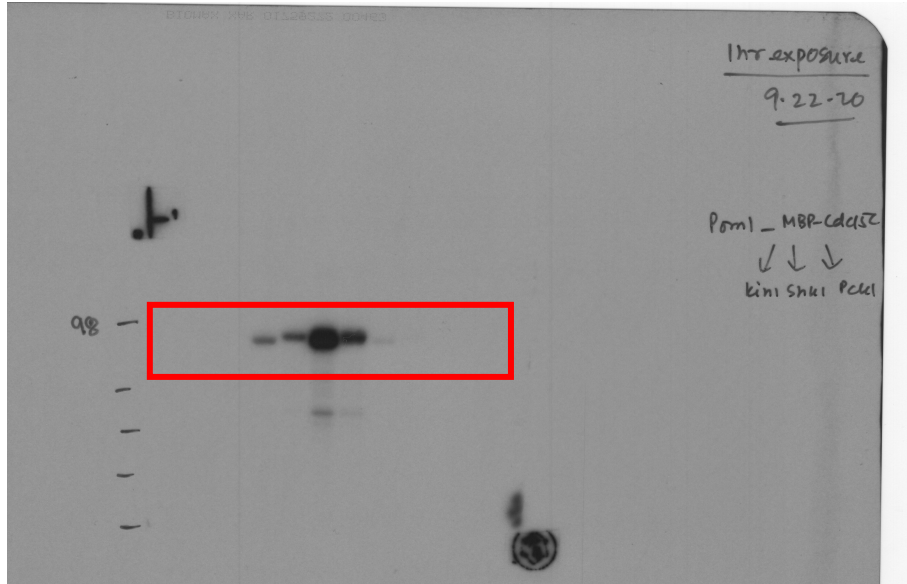

Short  
exposure- $^{32}\text{p}$

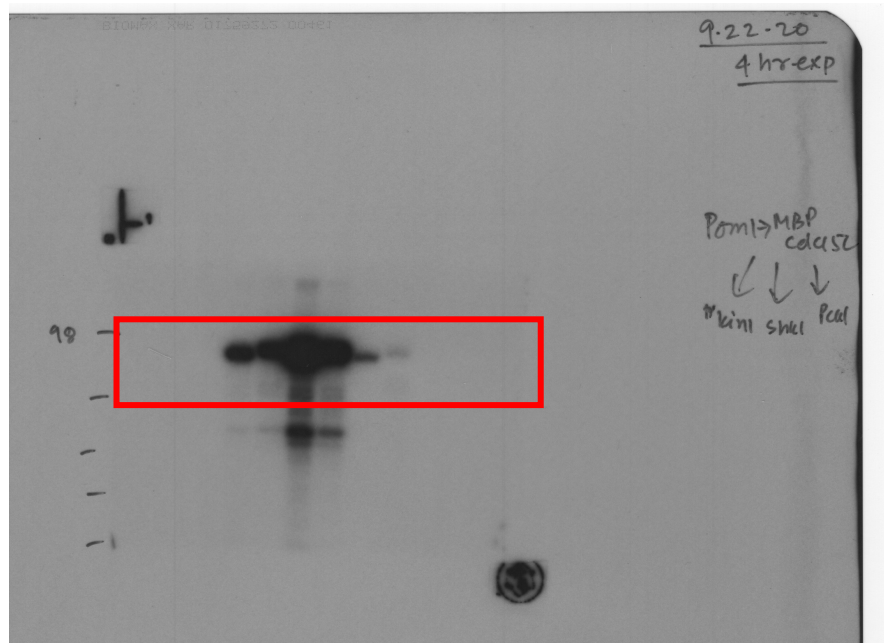

Longer  
exposure- $^{32}\text{p}$

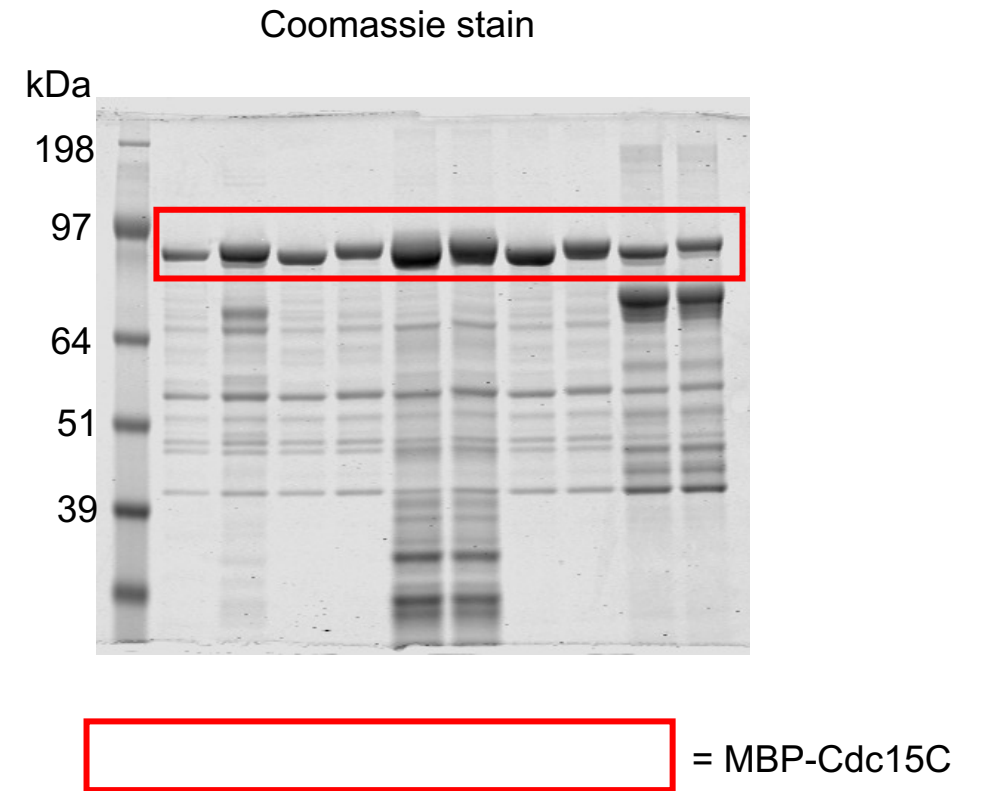

Figure-2B

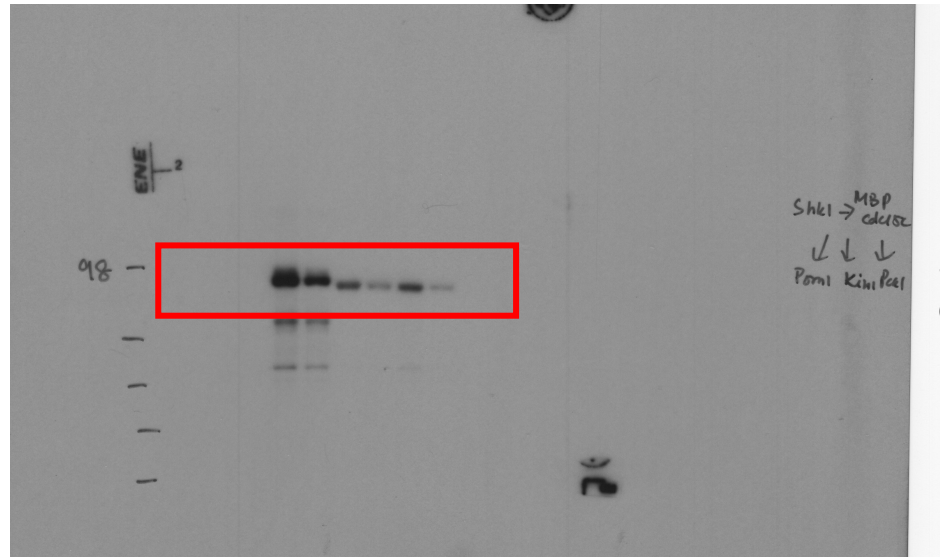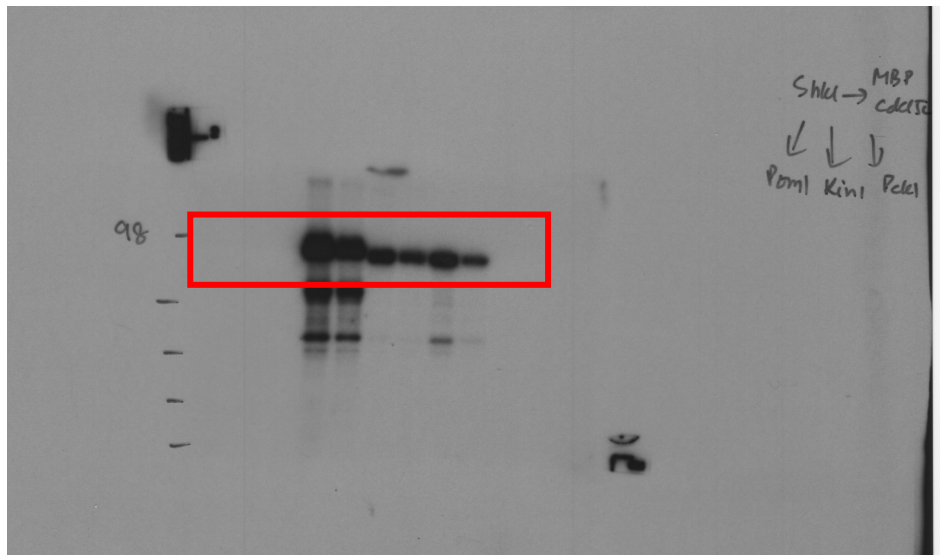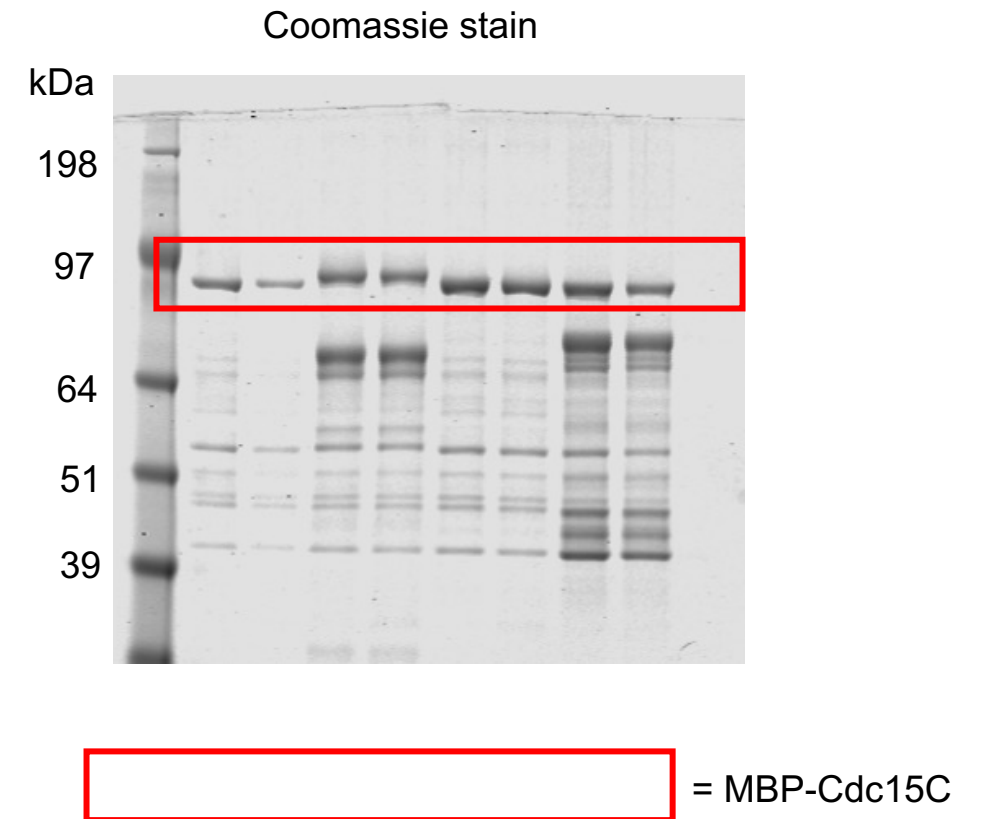

Figure-2C

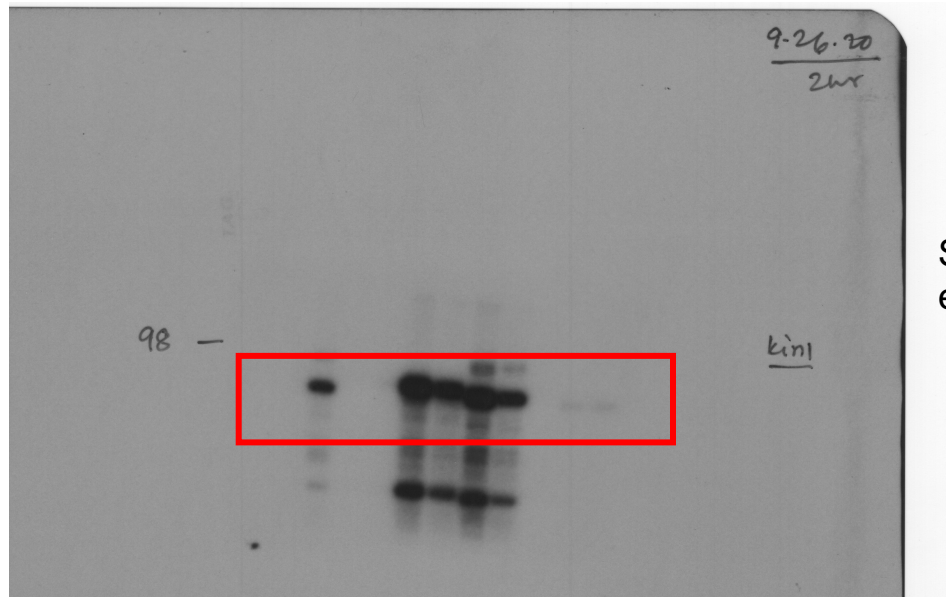

Short  
exposure- $^{32}\text{P}$

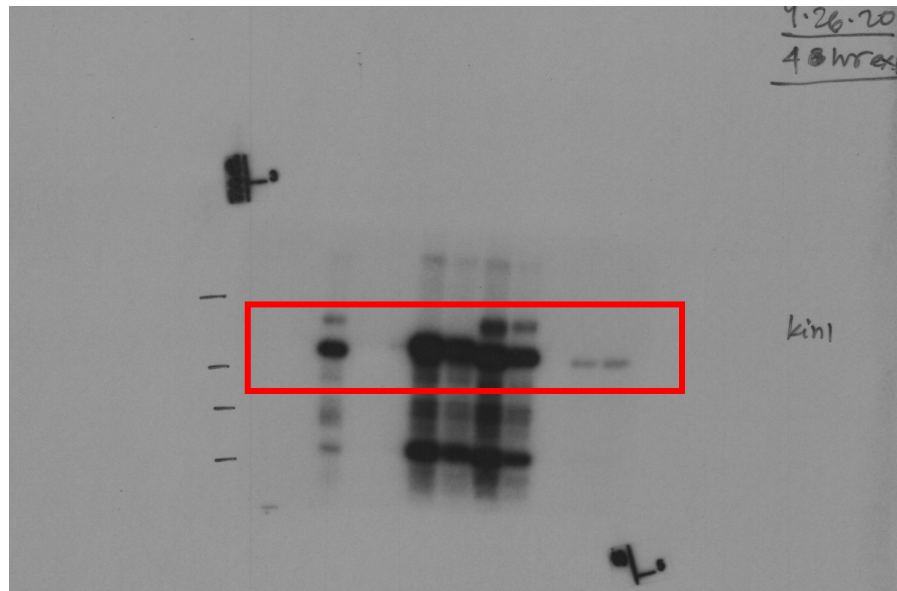

Longer  
exposure- $^{32}\text{P}$

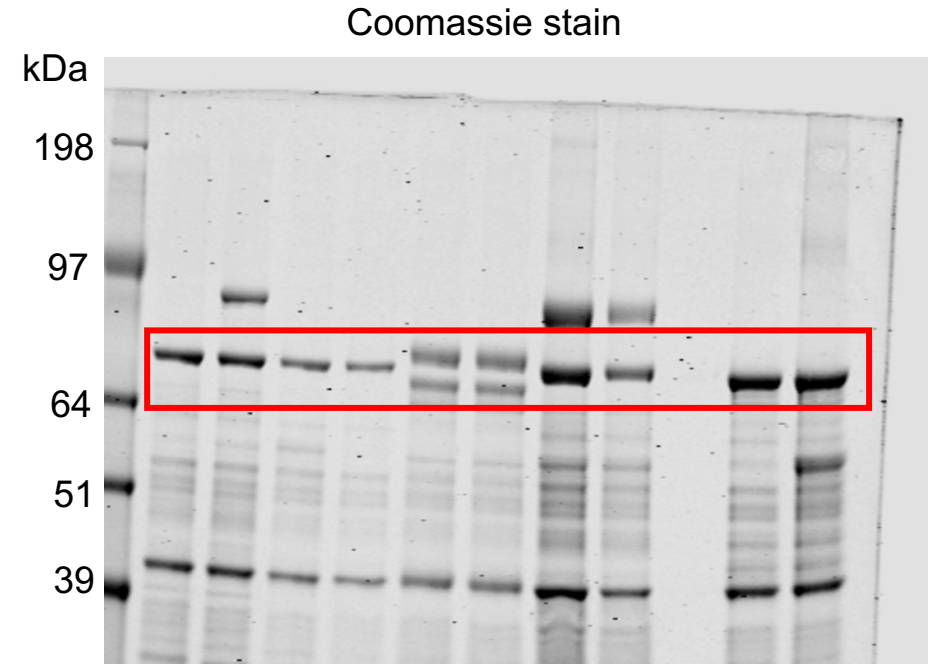

= GST-Cdc15C

Figure-2D

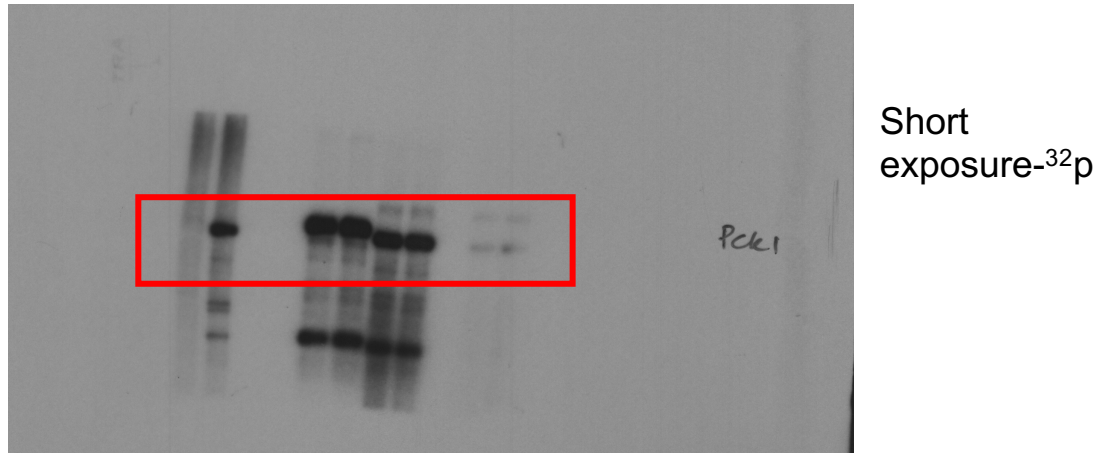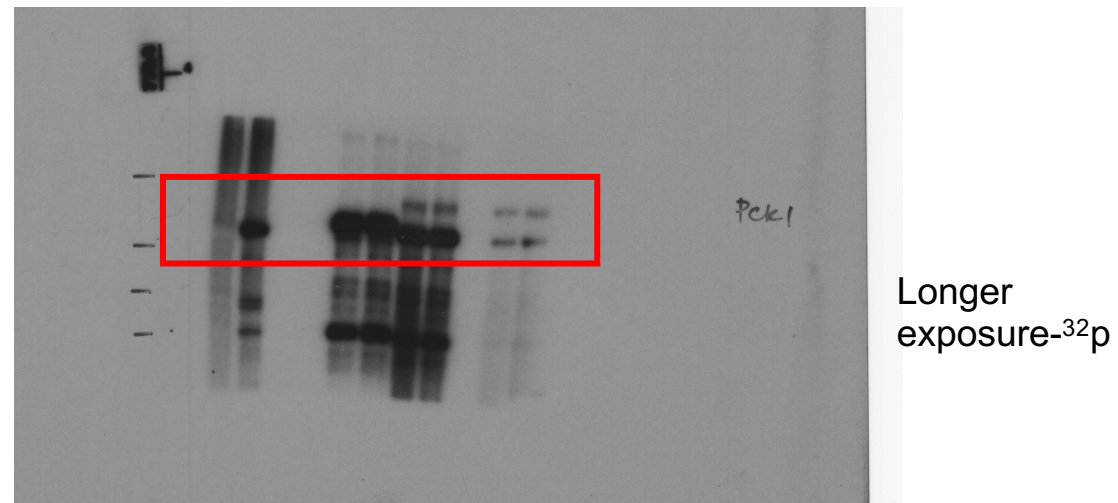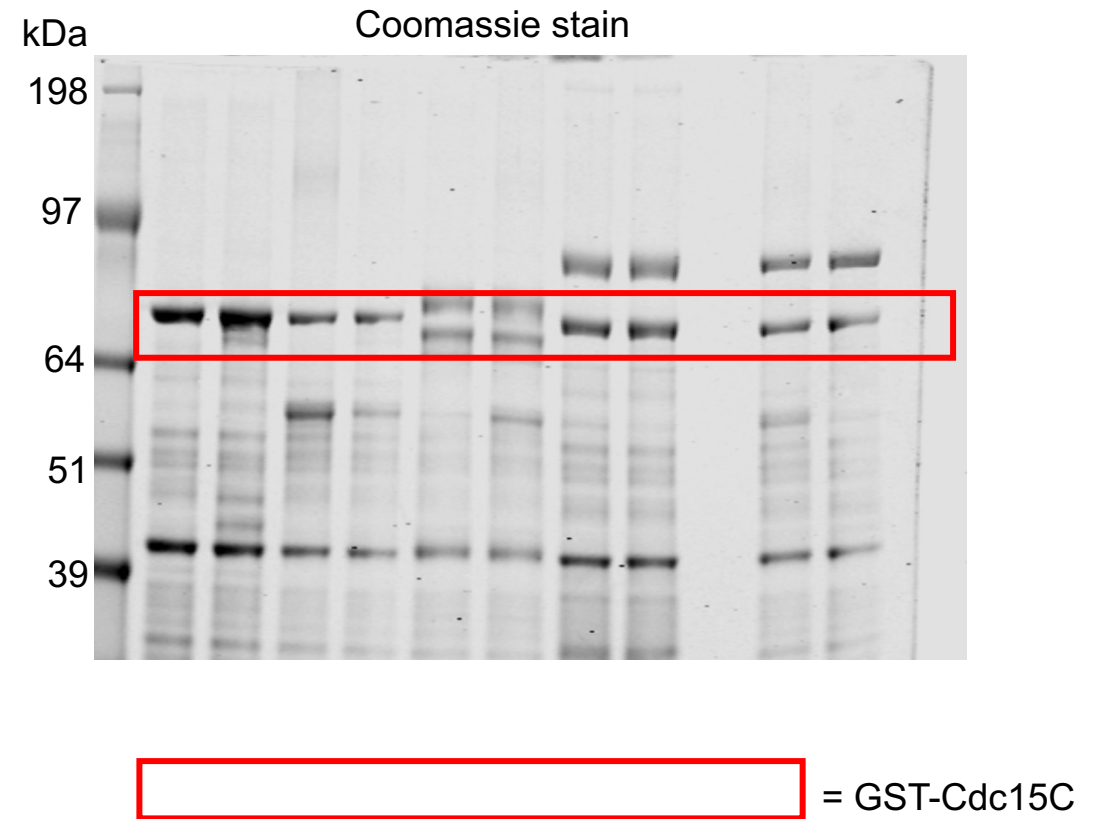

Supplement: fig2-data1 [file elife-83062-fig2-data1-v1.zip]
