# Supplementary material for: Multiple polarity kinases inhibit phase separation of F-BAR protein Cdc15 and antagonize cytokinetic ring assembly in fission yeast
Source: eLife journal article supplement (doi:10.7554/elife.83062), 2023-01-16
Supplement: fig2-figsupp1-data1 [file elife-83062-fig2-figsupp1-data1-v1.zip]

2017-05-20-5105  
nmw2p  
2017-05-11 KLMAC  
HSMUN

Low: 1 2 3 4 5 6 7 8 9 10  
↓ ladder  
main body

-0

-

-

-

-
