# Supplementary material for: Multiple polarity kinases inhibit phase separation of F-BAR protein Cdc15 and antagonize cytokinetic ring assembly in fission yeast
Source: eLife journal article supplement (doi:10.7554/elife.83062), 2023-01-16
Supplement: fig2-figsupp1-data1 [file elife-83062-fig2-figsupp1-data1-v1.zip]

Figure 1-figure supplement-1A (Kin1)

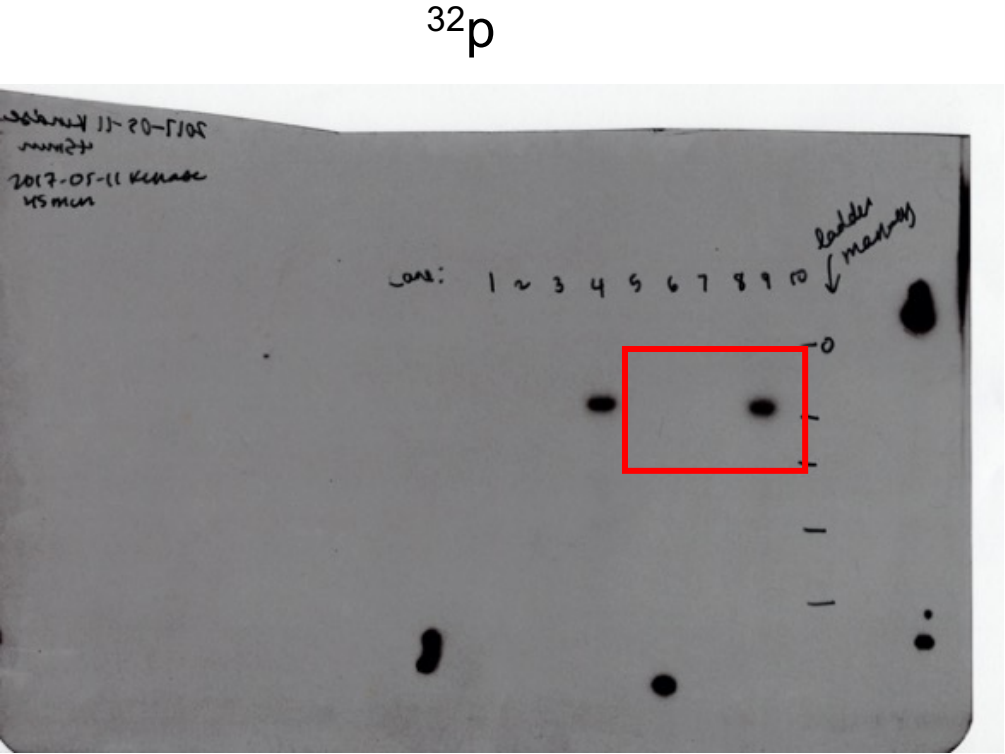

 =MBP-Cdc15N, MBP-Cdc15C

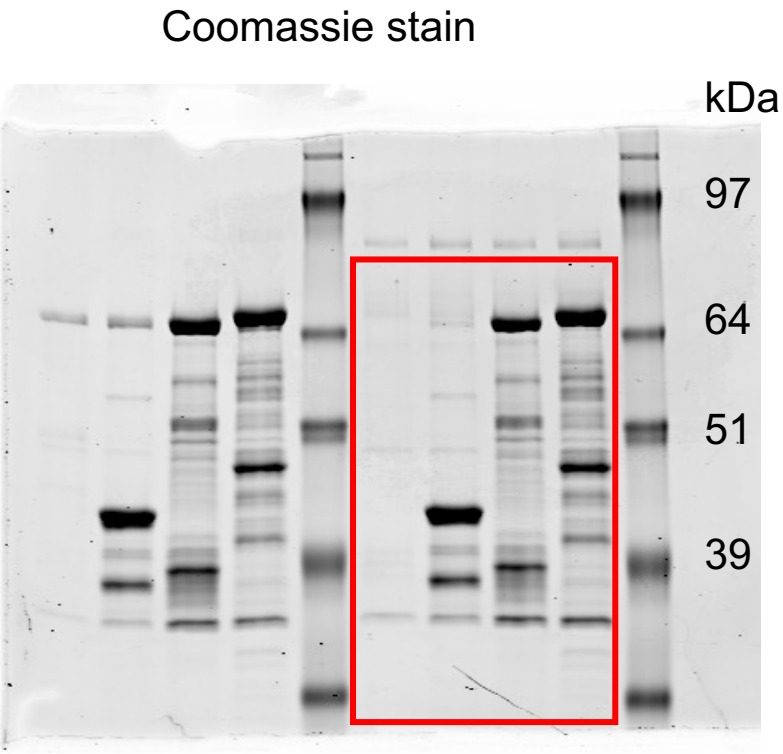

 =No substrate, MBP, MBP-Cdc15N, MBP-Cdc15C

Figure 1-figure supplement-1A (Shk1 and Pck1)

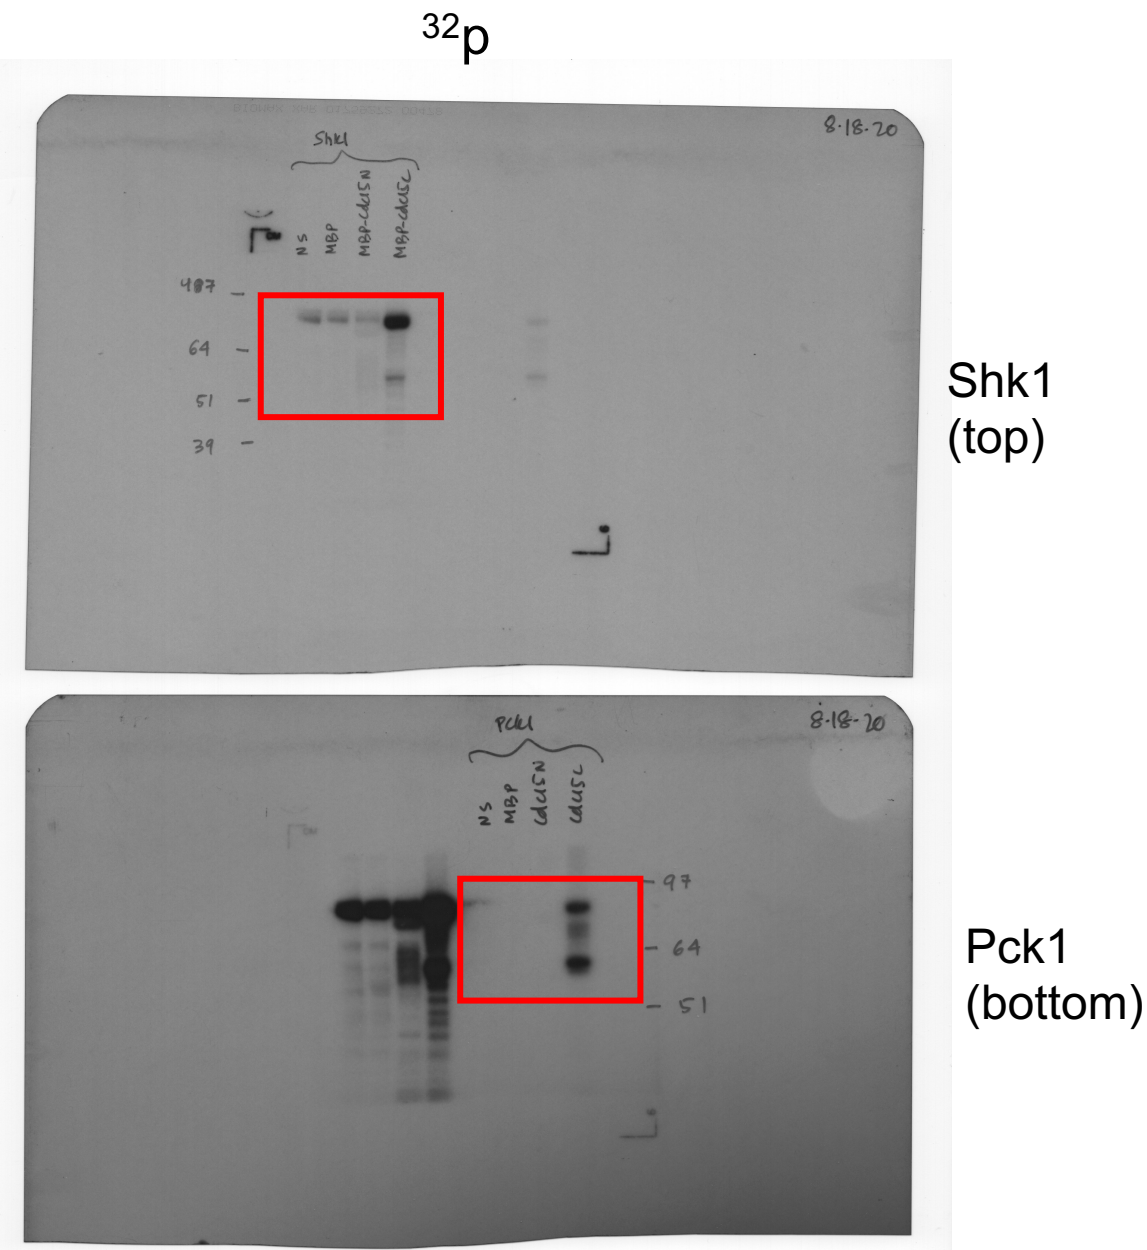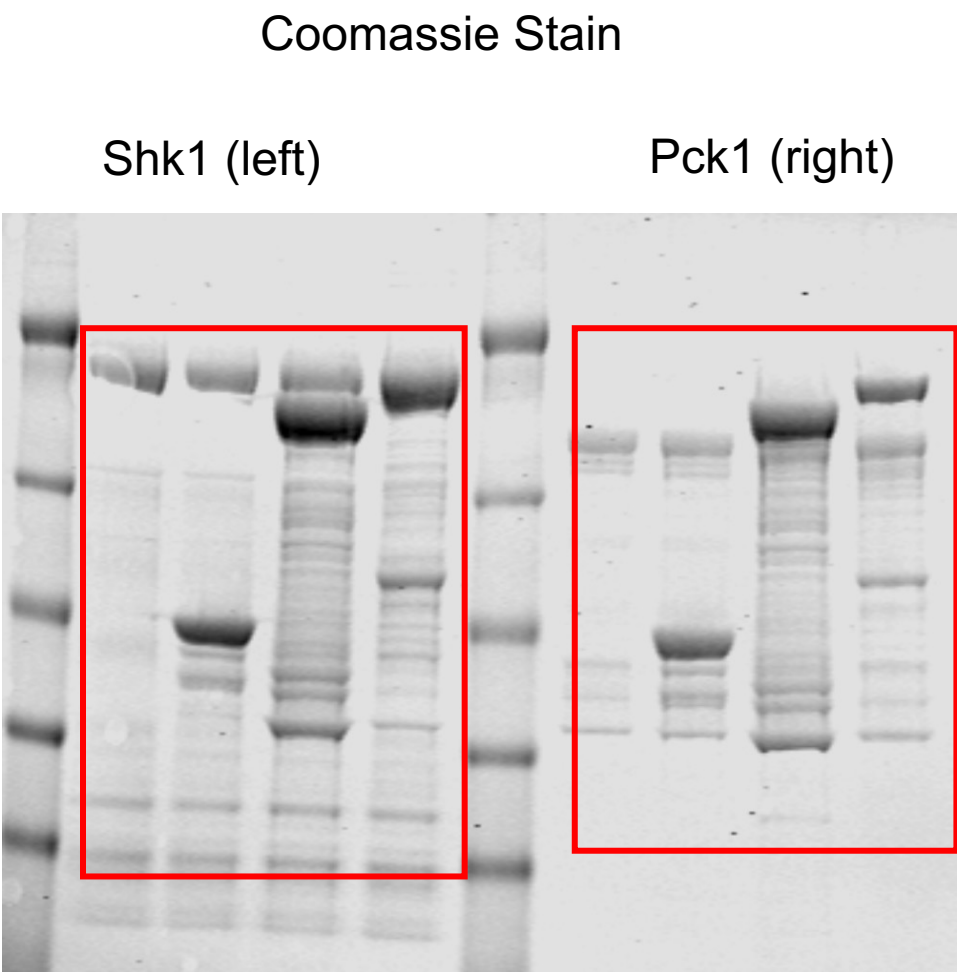

Figure 1-figure supplement-1B (Kin1-left, Shk1-middle and Pck1-right)-Coomassie

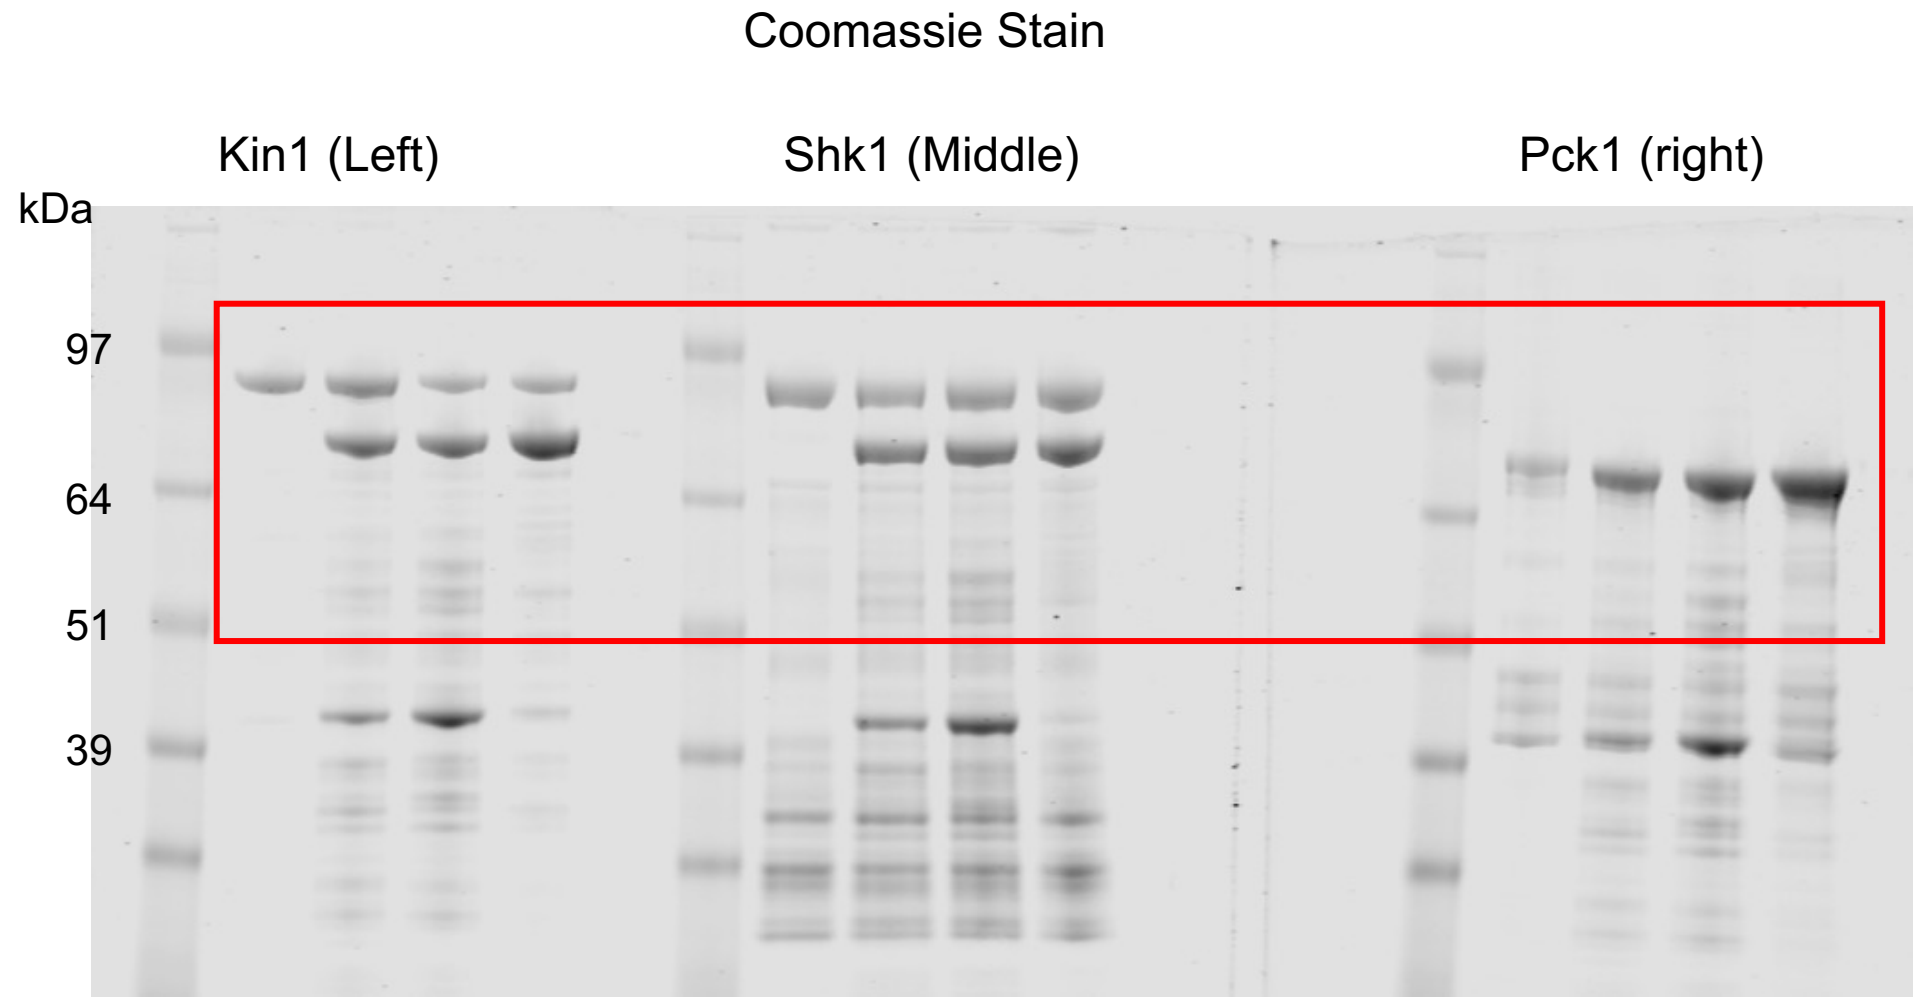

Figure 1-figure supplement-1B (Kin1-left top, Shk1-right and Pck1-left bottom)-<sup>32</sup>p

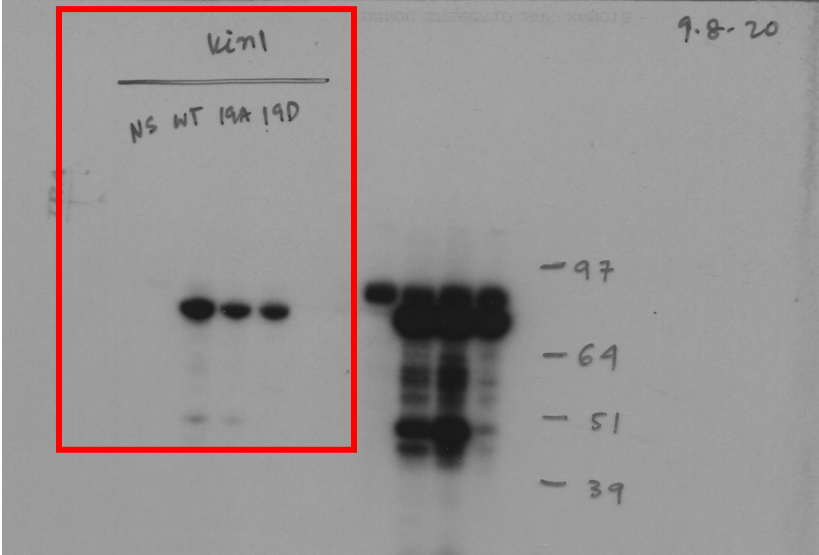

Kin1

<sup>32</sup>p

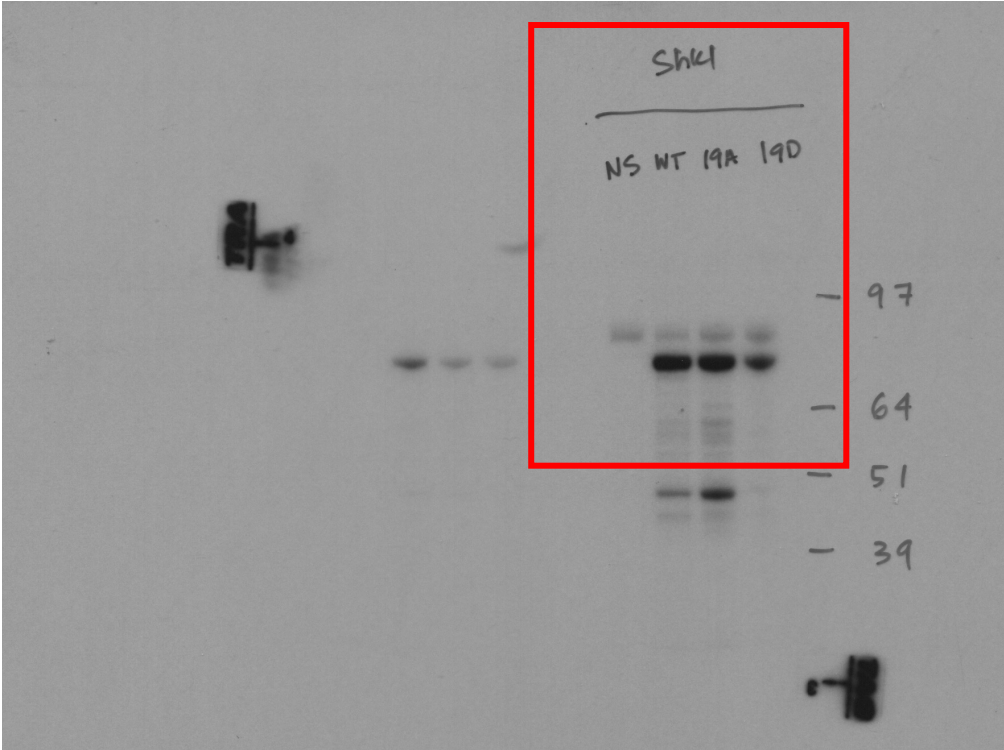

Shk1

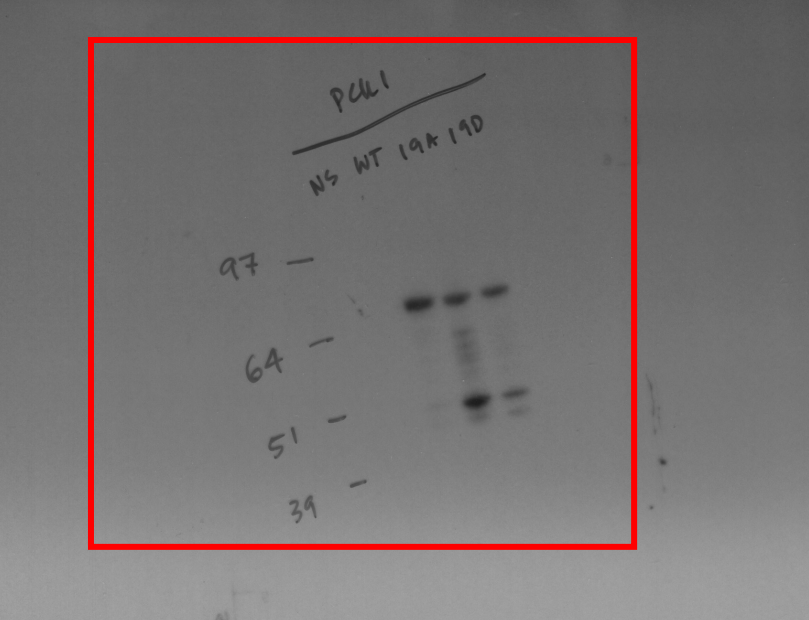

Pck1
