# Supplementary material for: La pintura de Europa Oriental (1917-1989)
Source: eLife journal article supplement (doi:10.7554/elife.83062), 1990-01-01
Supplement: fig4-data1 [file Constricted ring_wt and 31A_NORMALIZED.xlsx]

## Sheet: cdc15-31A
31A (Strain# 5366)
Length of CR (micron)	mNG-Cdc15	Area	Int Density	Raw Int Density	Backgorund corrected	Rlc1-mcherry	Area	Int Density	Raw Int Density	Backgorund corrected	mNG-Cdc15 per micron	Rlc1-mCh per micron
2.49	1	7.622	67511.1	5757028	4.78597e+06	4	3.354	15783.4	1345938	843910	1.92208e+06	338920
2.71	2	5.394	52938.3	4514332	3.82713e+06	5	3.412	25887.6	2207570	1.69686e+06	1.41222e+06	626148
			Pixel background	127402				Pixel background	149680		#DIV/0!	#DIV/0!
	Background	94.494	141175	12038719		Background	61.272	107548	9171223		#DIV/0!	#DIV/0!
											#DIV/0!	#DIV/0!
3.38	7	6.262	45555	3884714	3.12557e+06	10	6.192	26458.7	2256271	1.32598e+06	924724	392302
2.7	8	7.634	55323.2	4717702	3.79223e+06	11	5.359	19224.2	1639349	834211	1.40453e+06	308967
			Pixel background	121231				Pixel background	150240		#DIV/0!	#DIV/0!
	Background	74.758	106279	9062960		Background	67.78	119417	10183296		#DIV/0!	#DIV/0!
											#DIV/0!	#DIV/0!
2.66	13	4.831	49251.9	4199970	3.61381e+06	17	3.577	11902.2	1014963	489852	1.35857e+06	184155
2.8	14	4.82	45068.6	3843235	3.25841e+06	18	4.644	15877.6	1353967	672218	1.16372e+06	240078
3.02	15	5.465	34701.9	2959213	2.29613e+06	19	5.453	18355	1565227	764715	760307	253217
			Pixel background	121333				Pixel background	146802		#DIV/0!	#DIV/0!
	Background	76.916	109439	9332467		Background	110.923	190955	16283741		#DIV/0!	#DIV/0!
1.82	1	4.104	48730.8	4155531	3.62892e+06	6	2.838	13593	1159149	744764	1.99391e+06	409211
2.52	2	5.042	52602.4	4485683	3.83871e+06	7	5.687	21938.5	1870814	1.04044e+06	1.5233e+06	412872
2.71	3	3.928	47392	4041368	3.53734e+06	8	4.749	20000.9	1705580	1.01216e+06	1.30529e+06	373492
2.95	4	6.262	55186	4706000	3.90248e+06	9	5.242	19757.7	1684843	919443	1.32288e+06	311675
			Pixel background	128316				Pixel background	146013		#DIV/0!	#DIV/0!
	Background	59.912	90151.4	7687689		Background	61.26	104893	8944758		#DIV/0!	#DIV/0!
2.21	1	4.151	53126.7	4530395	3.99112e+06	3	4.609	25132.6	2143190	1.41353e+06	1.80593e+06	639606
			Pixel background	129915				Pixel background	158312		#DIV/0!	#DIV/0!
	Background	33.14	50488.2	4305397		Background	60.791	112857	9623948		#DIV/0!	#DIV/0!
2.45	1	4.82	53865.3	4593377	3.95756e+06	4	3.53	17766	1515002	944318	1.61533e+06	385436
2.38	2	6.555	56517.5	4819546	3.95486e+06	5	3.483	16478.1	1405179	842093	1.66171e+06	353821
			Pixel background	131912				Pixel background	161667		#DIV/0!	#DIV/0!
	Background	89.369	138244	11788842		Background	59.818	113404	9670592		#DIV/0!	#DIV/0!
2.86	1	4.62	48263.6	4115690	3.5099e+06	4	4.233	22898.2	1952655	1.30327e+06	1.22724e+06	455691
2.46	2	4.726	44300.5	3777737	3.15805e+06	5	4.632	18383	1567620	857030	1.28376e+06	348386
			Pixel background	131123				Pixel background	153409		#DIV/0!	#DIV/0!
	Background	64.99	99931.2	8521664		Background	113.022	203325	17338588		#DIV/0!	#DIV/0!
2.63	1	7.024	49780.3	4245027	3.3158e+06	5	4.386	18913.6	1612862	929282	1.26076e+06	353339
2.76	2	4.351	44379.6	3784482	3.20887e+06	6	4.726	22176.7	1891129	1.15456e+06	1.16264e+06	418318
2.47	3	4.421	37648.7	3210501	2.62563e+06	7	4.691	18835.1	1606168	875052	1.06301e+06	354272
			Pixel background	132293				Pixel background	155855		#DIV/0!	#DIV/0!
	Background	85.3	132332	11284626		Background	231.239	422628	36039762		#DIV/0!	#DIV/0!
2.56	1	5.664	45418	3873035	3.12748e+06	8	4.867	16293.9	1389464	636905	1.22167e+06	248791
2.81	2	7.575	51823.1	4419233	3.42214e+06	9	5.066	14552.1	1240931	457602	1.21784e+06	162848
2.75	3	7.13	59821.7	5101311	4.16279e+06	10	8.561	26158.8	2230700	906957	1.51374e+06	329803
2.18	4	6.743	47963.9	4090134	3.20255e+06	11	7.599	25281.6	2155900	980906	1.46906e+06	449957
2.65	5	5.289	42902.5	3658527	2.96234e+06	12	8.432	28624.5	2440959	1.13716e+06	1.11786e+06	429118
2.13	6	3.858	37780.9	3221780	2.71395e+06	13	11.105	36424.5	3106113	1.389e+06	1.27416e+06	652115
			Pixel background	131630				Pixel background	154625
	Background	114.066	176071	15014510		Background	410.166	743730	63421822

## Sheet: cdc15-wt
WT (Strain# 5365)
Length of CR (micron)	mNG-Cdc15	Area	Int Density	Raw Int Density	Backgorund corrected	Rlc1-mcherry	Area	Int Density	Raw Int Density	Backgorund corrected	mNG-Cdc15 per micron	Rlc1-mCh per micron
2.77	1	5.605	44103.3	3760924	3.01042e+06	4	5.312	23586.9	2011384	1.20749e+06	1.08679e+06	435918
2.74	2	4.573	25523.3	2176509	1.56419e+06	5	4.386	17434.7	1486751	822996	570872	300363
			Pixel Background	133899				Pixel Background	151335		#DIV/0!	#DIV/0!
	Background	168.794	265039	22601313		Background	227.803	404274	34474561		#DIV/0!	#DIV/0!
3.15	1	4.573	30602.6	2609646	1.99003e+06	3	4.562	17988.3	1533957	860396	631754	273142
			Pixel Background	135495				Pixel Background	147646		#DIV/0!	#DIV/0!
	Background	114.605	182098	15528443		Background	160.973	278709	23767023		#DIV/0!	#DIV/0!
3.1	1	5.289	33533.9	2859612	2.18989e+06	4	4.902	20551.6	1752545	1.04336e+06	706416	336569
3.51	2	3.799	18065	1540497	1.05945e+06	5	4.691	13695.1	1167856	489199	301837	139373
			Pixel Background	126626				Pixel Background	144672		#DIV/0!	#DIV/0!
	Background	98.88	146827	12520739		Background	64.872	110057	9385168		#DIV/0!	#DIV/0!
3.47	1	9.51	51122.9	4359521	3.14478e+06	4	4.679	13939.2	1188667	495978	906276	142933
2.39	2	7.88	46618.8	3975435	2.9689e+06	5	4.186	18661.2	1591336	971632	1.24222e+06	406540
			Pixel Background	127733				Pixel Background	148042		#DIV/0!	#DIV/0!
	Background	174.752	261760	22321650		Background	123.365	214168	18263221		#DIV/0!	#DIV/0!
2.46	1	5.652	43988.4	3751125	2.98596e+06	4	6.614	31591.2	2393952	1.42952e+06	1.21381e+06	581105
2.94	2	4.069	27001.7	2302578	1.75172e+06	5	5.805	21178.4	1805993	959525	595824	326369
			Pixel Background	135379				Pixel Background	145817		#DIV/0!	#DIV/0!
	Background	168.724	267858	22841641		Background	262.796	449370	38320151		#DIV/0!	#DIV/0!
2.18	1	6.098	29166.1	2487150	1.69685e+06	5	5.383	15569.9	1327726	517685	778370	237470
2.93	2	6.649	33475.6	2854639	1.99293e+06	6	5.277	13797.4	1176580	382490	680179	130543
2.72	3	5.781	42223.6	3600630	2.85141e+06	7	4.667	18139.3	1546831	844535	1.04831e+06	310491
			Pixel Background	129601				Pixel Background	150481		#DIV/0!	#DIV/0!
	Background	161.477	245411	20927500		Background	226.678	400008	34110805		#DIV/0!	#DIV/0!
2.62	1	7.224	36146.4	3082396	2.18767e+06	5	6.473	18196.2	1551686	625813	834988	238860
3.41	2	7.646	39292.7	3350693	2.4037e+06	6	8.537	24865.9	2120451	899351	704897	263739
3.44	3	7.833	36544	3116305	2.14615e+06	7	9.745	25804.4	2200481	806594	623880	234475
			Pixel Background	123855				Pixel Background	143036		#DIV/0!	#DIV/0!
	Background	214.904	312130	26616940		Background	249.076	417787	35626873		#DIV/0!	#DIV/0!
3.42	1	5.746	37596.7	3206067	2.45224e+06	3	5.16	20462.4	1744940	1.02695e+06	717029	300279
			Pixel Background	131192				Pixel Background	139144		#DIV/0!	#DIV/0!
	Background	113.82	175106	14932249		Background	100.357	163753	13964124		#DIV/0!	#DIV/0!
2.63	1	4.82	24124.5	2057221	1.43853e+06	5	5.23	17686.1	1508189	720650	546970	274011
3.55	2	9.123	41991.7	3580857	2.40984e+06	6	5.57	18574	1583907	745170	678828	209907
3.41	3	6.473	34366.6	2930620	2.09975e+06	7	3.682	15313.5	1305865	751425	615763	220359
			Pixel Background	128359				Pixel Background	150581		#DIV/0!	#DIV/0!
	Background	101.811	153249	13068360		Background	224.496	396420	33804868		#DIV/0!	#DIV/0!
2.76	1	7.177	38786.8	3307554	2.39817e+06	5	6.25	18058.3	1539924	586197	868903	212390
3	2	5.125	34114.5	2909122	2.25975e+06	6	5.981	29610.9	2325078	1.4124e+06	753248	470800
3.39	3	5.535	29507.2	2516234	1.81491e+06	7	4.597	14392.3	1227304	525819	535371	155109
			Pixel Background	126708				Pixel Background	152596
	Background	124.901	185586	15825909		Background	134.764	241154	20564486

## Sheet: Combined valus
		mNG-Cdc15 intensity/micron				Rlc1-mCherry intensity/micron			Whole cell			mNG-Cdc15 intensity/micron (Normalized)				Rlc1-mCherry intensity/micron (Normalized)
		cdc15-wt	cdc15-31A			cdc15-wt	cdc15-31A		cdc15-wt	cdc15-31A		cdc15-wt	cdc15-31A			cdc15-wt	cdc15-31A
		1.08679e+06	1.92208e+06			435918	338920		5.21783e+06	8.94095e+06		1.08679e+06	1.95547e+06			435918	344808
		570872	1.41222e+06			300363	626148		4.6248e+06	8.88917e+06		570872	1.43676e+06			300363	637026
		631754	924724			273142	392302		6.46759e+06	6.78659e+06		631754	940789			273142	399118
		706416	1.40453e+06			336569	308967		5.44114e+06	9.9312e+06		706416	1.42893e+06			336569	314335
		301837	1.35857e+06			139373	184155		6.24156e+06	6.94955e+06		301837	1.38218e+06			139373	187354
		906276	1.16372e+06			142933	240078		4.98278e+06	8.5901e+06		906276	1.18393e+06			142933	244249
		1.24222e+06	760307			406540	253217		7.82986e+06	1.1381e+07		1.24222e+06	773516			406540	257616
		1.21381e+06	1.99391e+06			581105	409211		6.82062e+06	9.75941e+06		1.21381e+06	2.02855e+06			581105	416320
		595824	1.5233e+06			326369	412872		1.27777e+07	1.1781e+07		595824	1.54976e+06			326369	420045
		778370	1.30529e+06			237470	373492		1.51009e+07	8.90282e+06		778370	1.32797e+06			237470	379981
		680179	1.32288e+06			130543	311675		9.67477e+06	6.17761e+06		680179	1.34586e+06			130543	317090
		1.04831e+06	1.80593e+06			310491	639606		8.86547e+06	1.11806e+07		1.04831e+06	1.83731e+06			310491	650718
		834988	1.61533e+06			238860	385436		8.743e+06	7.89223e+06		834988	1.64339e+06			238860	392132
		704897	1.66171e+06			263739	353821		6.54702e+06	9.2877e+06		704897	1.69058e+06			263739	359968
		623880	1.22724e+06			234475	455691		7.96093e+06	4.78923e+06		623880	1.24856e+06			234475	463607
		717029	1.28376e+06			300279	348386		7.02366e+06	5.31997e+06		717029	1.30606e+06			300279	354439
		546970	1.26076e+06			274011	353339		6.48615e+06	3.74063e+06		546970	1.28266e+06			274011	359478
		678828	1.16264e+06			209907	418318		1.0283e+07	1.19564e+06		678828	1.18283e+06			209907	425586
		615763	1.06301e+06			220359	354272		8.93429e+06	1.06592e+07		615763	1.08148e+06			220359	360427
		868903	1.22167e+06			212390	248791		1.01117e+07	8.11551e+06		868903	1.2429e+06			212390	253113
		753248	1.21784e+06			470800	162848		8.45081e+06	9.84261e+06		753248	1.239e+06			470800	165677
		535371	1.51374e+06			155109	329803		7.23967e+06	8.22802e+06		535371	1.54004e+06			155109	335532
			1.46906e+06				449957		7.31472e+06	8.77499e+06			1.49458e+06				457774
			1.11786e+06				429118		1.0984e+07	8.30022e+06			1.13728e+06				436573
			1.27416e+06				652115		8.58133e+06	1.02763e+07			1.29629e+06				663444
									7.59644e+06	8.26309e+06
								Average	8.08853e+06	8.22905e+06
								Factor	1	1.01737
