# Supplementary material for: La pintura de Europa Oriental (1917-1989)
Source: eLife journal article supplement (doi:10.7554/elife.83062), 1990-01-01
Supplement: fig4-data1 [file Cytokinesis timing-wt and 31A.xlsx]

## Sheet: cdc15-wt and 31A
cdc15-31A
Max projections of D3D
Images taken every 2 min
	in minutes					Length of cytokinesis stage (min)
Cell	SPB separation	CR form	Constrict start	Constrict end		Formation	Maturation	Constriction
1	0	12	28	48		12	16	20
2	0	10	22	42		10	12	20
3	0	10	24	42		10	14	18
4	0	14	26	48		14	12	22
5	0	12	26	46		12	14	20
6	0	8	24	42		8	16	18
7	0	10	26	44		10	16	18
8	0	14	26	44		14	12	18
9	0	12	26	44		12	14	18
10	0	10	24	42		10	14	18
11	0	12	26	42		12	14	16
12	0	16	30	44		16	14	14
13	0	10	24	40		10	14	16
14	0	16	30	44		16	14	14
15	0	12	28	44		12	16	16
16	0	10	22	40		10	12	18
17	0	12	24	38		12	12	14
18	0	12	24	40		12	12	16
19	0	10	24	42		10	14	18
20	0	12	24	42		12	12	18
21	0	12	22	36		12	10	14
22	0	12	24	40		12	12	16
23	0	14	26	42		14	12	16
24	0	12	28	46		12	16	18
cdc15-wt	in minutes					Length of cytokinesis stage (min)
Cell	SPB separation	CR form	Constrict start	Constrict end		Formation	Maturation	Constriction
1	0	10	28	48		10	18	20
2	0	8	26	46		8	18	20
3	0	10	26	44		10	16	18
4	0	12	30	50		12	18	20
5	0	10	28	48		10	18	20
6	0	12	30	48		12	18	18
7	0	8	26	52		8	18	26
8	0	12	28	50		12	16	22
9	0	10	30	54		10	20	24
10	0	10	30	50		10	20	20
11	0	12	26	44		12	14	18
12	0	10	28	46		10	18	18
13	0	12	28	44		12	16	16
14	0	10	26	44		10	16	18
15	0	10	24	44		10	14	20
16	0	10	26	48		10	16	22
17	0	12	28	52		12	16	24
18	0	10	28	44		10	18	16
19	0	10	26	50		10	16	24
20	0	10	26	46		10	16	20
21	0	10	30	48		10	20	18
22	0	14	28	46		14	14	18
23	0	10	26	44		10	16	18
24	0	10	24	44		10	14	20
25	0	12	30	50		12	18	20
26	0	10	26	44		10	16	18
27	0	10	28	48		10	18	20
28	0	12	28	50		12	16	22
