# Supplementary material for: La pintura de Europa Oriental (1917-1989)
Source: eLife journal article supplement (doi:10.7554/elife.83062), 1990-01-01
Supplement: fig4-data1 [file mNG-Cdc15-rlc1-mCh_Full CR_NORMALIZED.xlsx]

## Sheet: wt and 31A-calculations
31A
mnG-Cdc15		area	integrated density	raw integrated density	CR Intensity (background subtracted)		rlc1-mCherry		area	integrated density	raw integrated density	CR Intensity (background subtracted)
	1	5.95	115149	22173245	1.41712e+07			1	6.37	15912.1	3464061	1.06429e+06
	2	6.82	141835	27311882	1.81397e+07			2	7.28	19651	3784020	1.04143e+06
	3	6.43	117105	25549849	1.69022e+07			3	7.7	19757.5	3804533	903713
			Pixel background	1.34489e+06						Pixel background	376730
Background	4	142.27	993643	191337310			Background	4	142.69	279161	53755584
	1	7.44	131821	25383559	1.58992e+07			1	6.76	17649	3398518	874646
	2	5.61	102685	20773193	1.36217e+07			2	5.81	14109.3	2916899	747713
			Pixel background	1.27478e+06						Pixel background	373354
Background	3	230	1.52262e+06	293198884			Background	3	82.93	160791	30962237
	1	5.98	110054	21192142	1.29461e+07			1	6.57	16325.6	3143688	716754
	2	6.25	126093	24280571	1.56623e+07			2	8.15	20359.8	3920523	909943
	3	6.68	114899	22125090	1.29138e+07			3	7.25	16789.8	3233078	554954
	4	6.1	123650	23810233	1.53988e+07			4	6.64	17275.8	3326646	873854
	5	6.69	123982	23874158	1.46491e+07			5	6.51	16377.3	3153643	748873
	6	6.7	132607	25535035	1.62962e+07			6	7.16	18308.4	3525498	880620
			Pixel background	1.37893e+06						Pixel background	369396
Background	7	98.76	707218	136183007			Background	7	102.47	196571	37852046
	1	6.78	114930	22131013	1.3376e+07			3	5.02	11998.8	2310506	457003
			Pixel background	1.2913e+06						Pixel background	369224
Background	2	177.63	1.19117e+06	229374246			Background	4	126.45	242459	46688349
	1	5.77	126358	24331709	1.66652e+07			1	5.45	13985.5	2693070	686352
	2	9.4	190860	36752260	2.42626e+07			2	9.28	24486.8	4715212	1.29827e+06
	3	5.05	149551	28797827	2.2088e+07			3	7.64	21591.5	4157697	1.34461e+06
	4	7.77	149785	28842810	1.85189e+07			4	7.29	18948.4	3648731	964516
			Pixel background	1.32869e+06						Pixel background	368205
Background	5	189.89	1.31025e+06	252304365			Background	5	197.25	377170	72628449
	1	6.13	153973	28797974	2.09605e+07			1	8.15	21470.7	4134437	1.15718e+06
	2	6.04	108468	20886804	1.31644e+07			2	6.06	14374.7	2768009	554246
	3	6.26	106101	20430965	1.24273e+07			3	5.91	14495.8	2791328	632361
	4	7.58	131468	25315752	1.56244e+07			4	6.19	15124.2	2912344	651091
	5	5.82	120321	24169171	1.67281e+07			5	7.72	20368.1	3922118	1.10194e+06
			Pixel background	1.27854e+06						Pixel background	365307
Background	6	176.73	1.17342e+06	225956412			Background	6	395.82	750908	144595986
	1	8.93	151732	29217814	1.74475e+07			3	7.29	17679.6	3404403	715560
			Pixel background	1.31807e+06						Pixel background	368840
Background	2	156.11	1.06856e+06	205763237			Background	4	117.67	225390	43401390
	1	6.92	126258	24312470	1.42993e+07			1	6.3	15582.2	3000535	620618
			Pixel background	1.44698e+06						Pixel background	377765
Background	4	77.1	579360	111562499			Background	4	174.74	342803	66010577
	1	8.27	135740	26138216	1.44156e+07			4	8.28	19866.7	3825561	689760
	2	7.71	130792	25185589	1.42568e+07			5	7.06	17540.6	3377650	703887
			Pixel background	1.41748e+06						Pixel background	378720
Background	1900-01-03	86.73	638436	122938199			Background	6	155.22	305279	58784913
WT
mnG-Cdc15		area	integrated density	raw integrated density	CR Intensity (background subtracted)		rlc1-mCherry		area	integrated density	raw integrated density	CR Intensity (background subtracted)
	1	7.14	102856	19806198	1.03118e+07			6	5.93	13415.2	2783242	626226
	1900-01-02	8.01	136381	23261752	1.26105e+07			7	8.08	18754.3	3611360	672289
	3	7.36	137818	26538340	1.67514e+07			8	8.14	20001.1	3851446	890550
	4	8.05	126101	24282114	1.35777e+07			9	9.36	21257.3	4093344	688677
			Pixel background	1.32974e+06						Pixel background	363746
Background	5	218.38	1.50804e+06	290389669			Background	10	175.32	331178	63772028
	1	4.58	78045.3	15028522	9.22218e+06			9	7.48	16802.9	3235584	560616
	2	7.28	123817	23842458	1.46132e+07			10	7.15	17450.1	3360223	803268
	3	7.67	143212	27577039	1.78533e+07			11	7.12	17515.6	3372833	826606
	4	4.9	79035.6	15219217	9.00719e+06			12	5.9	13952.4	2686690	576755
	5	6.73	129927	20018898	1.14869e+07			13	7.58	18715.4	3303857	593127
	6	8.69	149432	26774932	1.57581e+07			14	9.19	22334.6	4200783	914291
	7	7.27	120732	23248385	1.40318e+07			15	6.5	15648	3013194	688689
			Pixel background	1.26776e+06						Pixel background	357616
Background	8	130.75	860815	165759707			Background	16	128.19	238068	45842806
	1	7.35	124246	21925001	1.24377e+07			5	6.92	16684.5	3212799	672988
	2	6.19	118682	20853661	1.28636e+07			6	5.66	13762.7	2650167	572807
	3	5.7	98076.8	16885810	9.52828e+06			7	5.72	13324.2	2565719	466338
			Pixel background	1.29079e+06						Pixel background	367025
Background	4	111.75	749092	144246239			Background	8	164.4	313349	60338861
	1	5.74	85589.7	14332501	6.85022e+06			3	4.72	11835.4	2079042	318499
			Pixel background	1.30353e+06						Pixel background	372996
Background	2	102.48	693733	133586165			Background	4	65.42	126720	24401426
	1	5.9	105022	20223167	1.16274e+07			5	5.14	13603.8	2619566	591175
	2	6.35	104542	19130812	9.87945e+06			6	5.87	14391	2771157	454688
	3	5.94	94725.3	15240444	6.58642e+06			7	5.25	12722.6	2449878	378078
			Pixel background	1.45691e+06						Pixel background	394629
Background	4	141.89	1.07353e+06	206720527			Background	8	183.82	376714	72540613
	1	8.86	141332	27215099	1.50101e+07			7	7.14	18539.4	3569966	812060
	2	5.44	150906	27058600	1.95648e+07			8	5.25	17200.1	3012073	984201
	3	6.74	138791	26725762	1.74412e+07			9	7.12	20208.8	3891439	1.14126e+06
	4	6.22	132567	23527266	1.4959e+07			10	5.05	15237.2	2734099	783479
	5	7.21	139464	24855393	1.49233e+07			11	8.02	21675.9	4073937	976121
			Pixel background	1.37754e+06						Pixel background	386261
Background	6	119.54	855160	164670938			Background	12	108.07	216779	41743270
	1	5.17	100058	19267243	1.20597e+07			5	5.99	15430	2971215	714327
	2	6.14	137269	24432633	1.58728e+07			6	6.48	17142.3	3300942	859434
	3	7.98	112652	22394926	1.12699e+07			7	3.25	9809.99	1889027	664505
			Pixel background	1.39411e+06						Pixel background	376776
Background	4	141.15	1.0219e+06	196779003			Background	8	78.79	154165	29686174

## Sheet: wt and 31A values
		mNG-Cdc15 intensity in CR				Rlc1-mCherry intensity in CR			Whole cell			mNG-Cdc15 intensity in CR (Normalized)				Rlc1-mCherry intensity in CR (Normalized)
		cdc15-wt	cdc15-31A			cdc15-wt	cdc15-31A		cdc15-wt	cdc15-31A		cdc15-wt	cdc15-31A			cdc15-wt	cdc15-31A
		1.03118e+07	1.41712e+07			626226	1.06429e+06		5.21783e+06	8.94095e+06		1.03118e+07	1.44174e+07			626226	1.08278e+06
		1.26105e+07	1.81397e+07			672289	1.04143e+06		4.6248e+06	8.88917e+06		1.26105e+07	1.84549e+07			672289	1.05952e+06
		1.67514e+07	1.69022e+07			890550	903713		6.46759e+06	6.78659e+06		1.67514e+07	1.71959e+07			890550	919413
		1.35777e+07	1.58992e+07			688677	874646		5.44114e+06	9.9312e+06		1.35777e+07	1.61754e+07			688677	889841
		9.22218e+06	1.36217e+07			560616	747713		6.24156e+06	6.94955e+06		9.22218e+06	1.38583e+07			560616	760703
		1.46132e+07	1.29461e+07			803268	716754		4.98278e+06	8.5901e+06		1.46132e+07	1.31711e+07			803268	729206
		1.78533e+07	1.56623e+07			826606	909943		7.82986e+06	1.1381e+07		1.78533e+07	1.59344e+07			826606	925751
		9.00719e+06	1.29138e+07			576755	554954		6.82062e+06	9.75941e+06		9.00719e+06	1.31382e+07			576755	564595
		1.14869e+07	1.53988e+07			593127	873854		1.27777e+07	1.1781e+07		1.14869e+07	1.56663e+07			593127	889035
		1.57581e+07	1.46491e+07			914291	748873		1.51009e+07	8.90282e+06		1.57581e+07	1.49036e+07			914291	761883
		1.40318e+07	1.62962e+07			688689	880620		9.67477e+06	6.17761e+06		1.40318e+07	1.65793e+07			688689	895919
		1.24377e+07	1.3376e+07			672988	457003		8.86547e+06	1.11806e+07		1.24377e+07	1.36084e+07			672988	464942
		1.28636e+07	1.66652e+07			572807	686352		8.743e+06	7.89223e+06		1.28636e+07	1.69547e+07			572807	698276
		9.52828e+06	2.42626e+07			466338	1.29827e+06		6.54702e+06	9.2877e+06		9.52828e+06	2.46841e+07			466338	1.32082e+06
		6.85022e+06	2.2088e+07			318499	1.34461e+06		7.96093e+06	4.78923e+06		6.85022e+06	2.24717e+07			318499	1.36797e+06
		1.16274e+07	1.85189e+07			591175	964516		7.02366e+06	5.31997e+06		1.16274e+07	1.88406e+07			591175	981272
		9.87945e+06	2.09605e+07			454688	1.15718e+06		6.48615e+06	3.74063e+06		9.87945e+06	2.13247e+07			454688	1.17729e+06
		6.58642e+06	1.31644e+07			378078	554246		1.0283e+07	1.19564e+06		6.58642e+06	1.33931e+07			378078	563875
		1.50101e+07	1.24273e+07			812060	632361		8.93429e+06	1.06592e+07		1.50101e+07	1.26432e+07			812060	643347
		1.95648e+07	1.56244e+07			984201	651091		1.01117e+07	8.11551e+06		1.95648e+07	1.58959e+07			984201	662402
		1.74412e+07	1.67281e+07			1.14126e+06	1.10194e+06		8.45081e+06	9.84261e+06		1.74412e+07	1.70187e+07			1.14126e+06	1.12109e+06
		1.4959e+07	1.74475e+07			783479	715560		7.23967e+06	8.22802e+06		1.4959e+07	1.77506e+07			783479	727992
		1.49233e+07	1.42993e+07			976121	620618		7.31472e+06	8.77499e+06		1.49233e+07	1.45478e+07			976121	631400
		1.20597e+07	1.44156e+07			714327	689760		1.0984e+07	8.30022e+06		1.20597e+07	1.46661e+07			714327	701743
		1.58728e+07	1.42568e+07			859434	703887		8.58133e+06	1.02763e+07		1.58728e+07	1.45045e+07			859434	716116
		1.12699e+07				664505			7.59644e+06	8.26309e+06		1.12699e+07				664505
								Average	8.08853e+06	8.22905e+06
								Factor	1	1.01737
