# Supplementary material for: La pintura de Europa Oriental (1917-1989)
Source: eLife journal article supplement (doi:10.7554/elife.83062), 1990-01-01
Supplement: fig4-data1 [file Whole Cell Intensity.xlsx]

## Sheet: wt and 31A
mNG-cdc15-wt
		Area	Mean	Int Den	Raw Int Den	Background corrected
	1	52.592	5271.94	277261	24171862	5.21783e+06
	2	37.772	5538.34	209194	18237744	4.6248e+06
	3	37.451	6114.81	229005	19964845	6.46759e+06
	4	55.884	5250.74	293431	25581605	5.44114e+06
	5	50.103	5562.86	278715	24298571	6.24156e+06
	6	39.791	5570.3	221647	19323370	4.98278e+06
	7	49.197	5959.51	293188	25560348	7.82986e+06
	8	32.897	6512.07	214229	18676623	6.82062e+06
				Pixel Background	360398
	Background	104.06	4133.93	430175	37502986
	1	58.27	6519.88	379911	33120988	1.27777e+07
	2	68.111	6547.64	445968	38879870	1.51009e+07
	3	66.081	5683.92	375599	32745051	9.67477e+06
	4	66.138	5542.08	366544	31955650	8.86547e+06
				Pixel Background	349121
	Background	591.173	4004.56	2.36739e+06	206391060
	1	58.499	5668.11	331580	28907387	8.743e+06
	2	47.74	5526.86	263852	23002814	6.54702e+06
	3	59.864	5479.18	328006	28595824	7.96093e+06
				Pixel Background	344696
	Background	144.917	3953.8	572974	49952340
	1	47.935	5557.36	266391	23224194	7.02366e+06
	2	49.977	5365.35	268142	23376823	6.48615e+06
	3	47.258	6372.51	301153	26254748	1.0283e+07
	4	66.884	5408.85	361765	31538998	8.93429e+06
	5	61.676	5757.16	355081	30956241	1.01117e+07
	6	54.014	5671.24	306327	26705857	8.45081e+06
				Pixel Background	337969
	Background	520.745	3876.64	2.01874e+06	175995610
	1	69.109	5129.59	354502	30905789	7.23967e+06
	2	64.188	5235.11	336033	29295657	7.31472e+06
	3	68.972	5754.73	396913	34603186	1.0984e+07
	4	56.044	5684.28	318572	27773383	8.58133e+06
	5	58.568	5412.08	316974	27634073	7.57768e+06
	6	55.161	5486.51	302643	26384629	7.49495e+06
	7	60.816	5360.74	326019	28422652	7.59644e+06
				Pixel Background	342446
	Background	210.551	3928	827044	72102393
mNG-cdc15-31A
		Area	Mean	Int Den	Raw Int Den	Background corrected
	1	55.092	6514.28	358887	27288073	8.94095e+06
	2	56.469	6438.12	363553	27694871	8.88917e+06
	3	72.218	5533.22	399596	30837139	6.78659e+06
	4	55.941	6676.45	373489	28561064	9.9312e+06
	5	75.406	5789.74	436584	32061784	6.94955e+06
	6	67.217	6139.11	412650	30975172	8.5901e+06
	7	69.947	6178.29	432150	34675218	1.1381e+07
	8	62.25	6171.06	384148	30490340	9.75941e+06
	9	65.404	6412.18	419384	33562274	1.1781e+07
	10	63.626	6146.02	391049	30091996	8.90282e+06
	11	62.227	6802.01	423268	26900879	6.17761e+06
				Pixel Background	333027
	Background	477.685	3819.95	1.82474e+06	159082004
	1	77.976	5306.61	413788	36074343	1.11806e+07
	2	79.914	4794.71	383166	33404717	7.89223e+06
	3	70.543	5172.11	364857	31808501	9.2877e+06
				Pixel Background	319249
	Background	702.356	3661.92	2.57197e+06	224226620
	1	59.749	4546.45	271648	23682485	4.78923e+06
	2	76.198	4427.9	337397	29414566	5.31997e+06
	3	61.585	4323.79	266279	23214444	3.74063e+06
				Pixel Background	316210
	Background	674.529	3627.06	2.44656e+06	213293068
	1	69.733	4669.43	325613	23811093	1.19564e+06
	2	58.409	3992.77	233214	29602103	1.06592e+07
	3	68.772	3709.92	255139	30419301	8.11551e+06
	4	53.219	4290.4	228331	27102330	9.84261e+06
	5	77.293	3992.77	308613	33295294	8.22802e+06
	6	60.295	3359.92	202586	28329558	8.77499e+06
	7	65.799	3122.38	205450	29639823	8.30022e+06
	8	54.118	3940.89	213273	27827532	1.02763e+07
	9	70.198	4292.11	301298	31029351	8.26309e+06
				Pixel Background	324315
	Background	623.909	4427.06	2.22699e+06	202343008
