# Supplementary material for: La pintura de Europa Oriental (1917-1989)
Source: eLife journal article supplement (doi:10.7554/elife.83062), 1990-01-01
Supplement: fig5-data1 [file as mutant mNG-Cdc15 Compiled Data ALL (Cells In Column) + STATISTICS 4-22-21 .xlsx]

## Sheet: mNG-Cdc15 W.T
			mNG-Cdc15 W.T (2 Replicate)
			0 min (No Treatment)	15 min (DMSO)	15 min (3MB-PP1)
				0.000753285	0.00180266
				0.000621604	0.00474607
				0.000733726	0.0013761
				0.000822399	0.000705232
				0.00171799	0.00143603
				0	0.00499605
				0.000390994	0.00267496
				0.00449785	0.000233943
				0.000214044	0.00301686
				0.00273616	0.00173858
				0.00025242	0.0032578
				0.000176969	0.00283681
				0.00157893	0.00134918
				0.0114499	0.000448292
				0.0081925	0.000699589
				0	0.00151787
				0.000297299	0
				0.0017397	0.00136218
				0.00028782	0.00398553
				0.000277205	0.000682673
				0.00124141	0.000908704
				0.000162328	0.00114208
				0.011747	0.00146061
				0.0141378	0.00412501
				0.00156338	0.0183967
				0.00274095	0.000186892
				0	0.000740387
				0.00172774	0.00185347
				0.00402275	0.00243038
				0.00102208	0.00535192
				0.00340574	0.00193201
				0.00488803	0.00252322
				0.000855212	0
				0.00290073	0.00262478
				0.000203921	0.000573502
				0.00178229	0.000116489
				0.00352182	0
				0.00437123	0.000408709
				0.00661688	0
				0.00405634	0.000248922
				0.0091622	0.00133023
				0.00623549	0.000569926
				0.011879	0
				0.00256437	0.000227159
				0.00542969	0.000279585
				0.00563355	0
				0.000697252	0.0012166
				0.000713134	0
				0.00162769	0.00055997
				0.00102566	0.00119448
				0.000160724	0.000548119
				0.00172625	0
				0.00922725	0.00119989
				0.00547552	0.000261361
				0.000193121	0.00163472
				0.000164557	0.000269795
				0.00142155	0.000347018
				0.000355892	0.000746275
				0.00352508	0
				0.000144579	0
				0.00404846	0.000488156
				0.000154458	0.00053241
				0	0.00742076
				0.000884817	0.000859918
				0.00301829	0.000771309
				0.0142637	0.000113087
				0.00128844	0.000282476
				0.000709775	0.000331985
				0.00311307	0.00671592
				0.000715776	0.00306622
				0.00227777	0.00487773
				0.00370243	0.00261371
				0.00113022	0.00265585
				0.00022679	0.000475005
				0.0143313	0
				0.00124143	0.00752832
				0.00104095	0.00249832
				0.000833626	0.00210455
				0.000391877	0.00291495
				0.000384598	0.000919199
				0.00100333	0.0035413
				0.000686886	0.00340728
				0.00155434	0.000747774
				0	0.0111369
				0.00106586	0.00527887
				0.0010561	0.00197232
				0.00353531	0.00272979
				0.00256572	0.00170032
				0.00127554	0.00243954
				0.00198116	0.00305868
				0.00658438	0.000545525
				0.00187983	0.00196477
				0.0010065	0.000715143
				0.00442788	0.00211582
				0.00226895	0.000825071
				0.000230029	0.00403924
				0.00845991	0.00427892
				0.00117033	0.00381792
				0.00294805	0.0105469
				0.00128123	0.0146146
				0.000592735	0.00334499
				0.00214788	0.00356428
				0.00183652	0.0182959
				0.00222616	0.0025459
				0.00227214	0.00217558
				0.000537941	0.0103224
				0.000763414	0.020094
				0.000769798	0.00696561
				0.000980118	0.00111019
				0.000839664	0.00488715
				0.0015547	0.0148257
				0.0024398	0.00425716
				0.00285968	0.00625222
				0.000184063	0.00259798
				0.001341	0.0117116
				0.000518506	0.00868737
				0.00263999	0.0129794
				0.00425954	0.0151523
				0.000612431	0.00285324
				0.00073932	0.00330326
				0.00030751	0.036976
				0.000980126	0.015482
				0.000629442	0.00477048
				0.000130133	0.00176014
				0.00350365
				0.000419371
				0.00106215
				0.00100658
				0.00028287
				0.00118849
				0
				0.000639339
				0.000323276
				0
				0.000368237
				0.000534062
				0.000916908
				0
				0.00119133
			AVG	0.00228352	0.00351481

## Sheet: STATISTICS
	ONE-WAY ANOVA
	Number of families	1
	Number of comparisons per family	780
	Alpha	0.05
	Tukey's multiple comparisons test	Mean Diff.	95.00% CI of diff.	Significant?	Summary	Adjusted P Value
	pom1as1 0 min vs. pom1as1 DMSO	0.001578	-0.01160 to 0.01476	No	ns	>0.9999	A-B
	pom1as1 0 min vs. pom1as1Trt	-0.02239	-0.03581 to -0.008968	Yes	****	<0.0001	A-C
	pom1as1 0 min vs. kin1as1 0 min	0.003116	-0.01256 to 0.01879	No	ns	>0.9999	A-D
	pom1as1 0 min vs. kin1as1 DMSO	0.002337	-0.01062 to 0.01530	No	ns	>0.9999	A-E
	pom1as1 0 min vs. kin1as1 Trt	-0.0076	-0.02100 to 0.005801	No	ns	0.9778	A-F
	pom1as1 0 min vs. shk1as2 0 min	-0.001112	-0.01415 to 0.01193	No	ns	>0.9999	A-G
	pom1as1 0 min vs. shk1as2 DMSO	-0.001573	-0.01428 to 0.01113	No	ns	>0.9999	A-H
	pom1as1 0 min vs. shk1as2 Trt	-0.01486	-0.02765 to -0.002062	Yes	**	0.0041	A-I
	pom1as1 0 min vs. pck1as2 0 min	0.002551	-0.01167 to 0.01677	No	ns	>0.9999	A-J
	pom1as1 0 min vs. pck1as2 DMSO	0.002472	-0.01054 to 0.01548	No	ns	>0.9999	A-K
	pom1as1 0 min vs. pck1as2 Trt	-0.00169	-0.01473 to 0.01135	No	ns	>0.9999	A-L
	pom1as1 0 min vs. pom1as1shk1as2 0 min	-0.001451	-0.01451 to 0.01160	No	ns	>0.9999	A-M
	pom1as1 0 min vs. pom1as1shk1as2 DMSO	-0.001235	-0.01429 to 0.01182	No	ns	>0.9999	A-N
	pom1as1 0 min vs. pom1as1shk1as2 Trt	-0.04322	-0.05624 to -0.03019	Yes	****	<0.0001	A-O
	pom1as1 0 min vs. pom1as1pck1as2 0 min	-0.002215	-0.01860 to 0.01417	No	ns	>0.9999	A-P
	pom1as1 0 min vs. pom1as1pck1as2 DMSO	0.001562	-0.01146 to 0.01459	No	ns	>0.9999	A-Q
	pom1as1 0 min vs. pom1as1pck1as2 Trt	-0.01989	-0.03294 to -0.006853	Yes	****	<0.0001	A-R
	pom1as1 0 min vs. pom1as1kin1as1 0 min	0.001393	-0.01499 to 0.01778	No	ns	>0.9999	A-S
	pom1as1 0 min vs. pom1as1kin1as1 DMSO	1.146e-05	-0.01312 to 0.01314	No	ns	>0.9999	A-T
	pom1as1 0 min vs. pom1as1kin1as1 Trt	-0.02376	-0.03690 to -0.01061	Yes	****	<0.0001	A-U
	pom1as1 0 min vs. shk1as2kin1as1 0 min	-0.001375	-0.01776 to 0.01501	No	ns	>0.9999	A-V
	pom1as1 0 min vs. shk1as2kin1as1 DMSO	-0.001004	-0.01410 to 0.01210	No	ns	>0.9999	A-W
	pom1as1 0 min vs. shk1as2kin1as1 Trt	-0.02645	-0.03973 to -0.01316	Yes	****	<0.0001	A-X
	pom1as1 0 min vs. kin1as1pck1as2 0 min	0.00216	-0.01411 to 0.01843	No	ns	>0.9999	A-Y
	pom1as1 0 min vs. kin1as1pck1as2 DMSO	0.001995	-0.01111 to 0.01510	No	ns	>0.9999	A-Z
	pom1as1 0 min vs. kin1as1pck1as2 Trt	-0.01367	-0.02682 to -0.0005221	Yes	*	0.0286	A-AA
	pom1as1 0 min vs. shk1as2pck1as2 0 min	0.0004566	-0.01540 to 0.01631	No	ns	>0.9999	A-AB
	pom1as1 0 min vs. shk1as2pck1as2 DMSO	0.0001745	-0.01285 to 0.01320	No	ns	>0.9999	A-AC
	pom1as1 0 min vs. shk1as2pck1as2 0 min	-0.0157	-0.02904 to -0.002356	Yes	**	0.0032	A-AD
	pom1as1 0 min vs. pomkinshk DMSO	-0.001899	-0.01482 to 0.01102	No	ns	>0.9999	A-AF
	pom1as1 0 min vs. pomkinshk Trt	-0.05898	-0.07185 to -0.04610	Yes	****	<0.0001	A-AG
	pom1as1 0 min vs. pomshkpck DMSO	-0.001129	-0.01387 to 0.01161	No	ns	>0.9999	A-AI
	pom1as1 0 min vs. pomshkpck TRT	-0.03768	-0.05043 to -0.02493	Yes	****	<0.0001	A-AJ
	pom1as1 0 min vs. pom kin pck DMSO	-7.077e-05	-0.01308 to 0.01294	No	ns	>0.9999	A-AL
	pom1as1 0 min vs. pom kin pck TRT	-0.03376	-0.04673 to -0.02079	Yes	****	<0.0001	A-AM
	pom1as1 0 min vs. shk kin pck DMSO	-0.000976	-0.01377 to 0.01182	No	ns	>0.9999	A-AO
	pom1as1 0 min vs. shk kin pck TRT	-0.02723	-0.04031 to -0.01414	Yes	****	<0.0001	A-AP
	pom1as1 0 min vs. W.T Cdc15 DMSO	0.001434	-0.01136 to 0.01423	No	ns	>0.9999	A-AR
	pom1as1 0 min vs. W.T Cdc15 TRT	0.000203	-0.01277 to 0.01318	No	ns	>0.9999	A-AS
	pom1as1 DMSO vs. pom1as1Trt	-0.02397	-0.03409 to -0.01385	Yes	****	<0.0001	B-C
	pom1as1 DMSO vs. kin1as1 0 min	0.001538	-0.01142 to 0.01450	No	ns	>0.9999	B-D
	pom1as1 DMSO vs. kin1as1 DMSO	0.0007595	-0.008740 to 0.01026	No	ns	>0.9999	B-E
	pom1as1 DMSO vs. kin1as1 Trt	-0.009177	-0.01927 to 0.0009159	No	ns	0.1534	B-F
	pom1as1 DMSO vs. shk1as2 0 min	-0.00269	-0.01230 to 0.006921	No	ns	>0.9999	B-G
	pom1as1 DMSO vs. shk1as2 DMSO	-0.003151	-0.01230 to 0.005996	No	ns	>0.9999	B-H
	pom1as1 DMSO vs. shk1as2 Trt	-0.01643	-0.02571 to -0.007161	Yes	****	<0.0001	B-I
	pom1as1 DMSO vs. pck1as2 0 min	0.0009737	-0.01018 to 0.01213	No	ns	>0.9999	B-J
	pom1as1 DMSO vs. pck1as2 DMSO	0.0008943	-0.008678 to 0.01047	No	ns	>0.9999	B-K
	pom1as1 DMSO vs. pck1as2 Trt	-0.003267	-0.01288 to 0.006343	No	ns	>0.9999	B-L
	pom1as1 DMSO vs. pom1as1shk1as2 0 min	-0.003028	-0.01266 to 0.006602	No	ns	>0.9999	B-M
	pom1as1 DMSO vs. pom1as1shk1as2 DMSO	-0.002813	-0.01244 to 0.006817	No	ns	>0.9999	B-N
	pom1as1 DMSO vs. pom1as1shk1as2 Trt	-0.04479	-0.05439 to -0.03520	Yes	****	<0.0001	B-O
	pom1as1 DMSO vs. pom1as1pck1as2 0 min	-0.003792	-0.01760 to 0.01002	No	ns	>0.9999	B-P
	pom1as1 DMSO vs. pom1as1pck1as2 DMSO	-1.522e-05	-0.009607 to 0.009576	No	ns	>0.9999	B-Q
	pom1as1 DMSO vs. pom1as1pck1as2 Trt	-0.02147	-0.03108 to -0.01186	Yes	****	<0.0001	B-R
	pom1as1 DMSO vs. pom1as1kin1as1 0 min	-0.0001842	-0.01399 to 0.01362	No	ns	>0.9999	B-S
	pom1as1 DMSO vs. pom1as1kin1as1 DMSO	-0.001566	-0.01130 to 0.008166	No	ns	>0.9999	B-T
	pom1as1 DMSO vs. pom1as1kin1as1 Trt	-0.02534	-0.03509 to -0.01558	Yes	****	<0.0001	B-U
	pom1as1 DMSO vs. shk1as2kin1as1 0 min	-0.002952	-0.01676 to 0.01086	No	ns	>0.9999	B-V
	pom1as1 DMSO vs. shk1as2kin1as1 DMSO	-0.002582	-0.01227 to 0.007109	No	ns	>0.9999	B-W
	pom1as1 DMSO vs. shk1as2kin1as1 Trt	-0.02802	-0.03796 to -0.01809	Yes	****	<0.0001	B-X
	pom1as1 DMSO vs. kin1as1pck1as2 0 min	0.0005822	-0.01309 to 0.01425	No	ns	>0.9999	B-Y
	pom1as1 DMSO vs. kin1as1pck1as2 DMSO	0.0004172	-0.009273 to 0.01011	No	ns	>0.9999	B-Z
	pom1as1 DMSO vs. kin1as1pck1as2 Trt	-0.01525	-0.02500 to -0.005493	Yes	****	<0.0001	B-AA
	pom1as1 DMSO vs. shk1as2pck1as2 0 min	-0.001121	-0.01430 to 0.01206	No	ns	>0.9999	B-AB
	pom1as1 DMSO vs. shk1as2pck1as2 DMSO	-0.001403	-0.01099 to 0.008188	No	ns	>0.9999	B-AC
	pom1as1 DMSO vs. shk1as2pck1as2 0 min	-0.01727	-0.02729 to -0.007261	Yes	****	<0.0001	B-AD
	pom1as1 DMSO vs. pomkinshk DMSO	-0.003476	-0.01292 to 0.005971	No	ns	>0.9999	B-AF
	pom1as1 DMSO vs. pomkinshk Trt	-0.06055	-0.06993 to -0.05117	Yes	****	<0.0001	B-AG
	pom1as1 DMSO vs. pomshkpck DMSO	-0.002706	-0.01191 to 0.006495	No	ns	>0.9999	B-AI
	pom1as1 DMSO vs. pomshkpck TRT	-0.03926	-0.04847 to -0.03004	Yes	****	<0.0001	B-AJ
	pom1as1 DMSO vs. pom kin pck DMSO	-0.001648	-0.01122 to 0.007924	No	ns	>0.9999	B-AL
	pom1as1 DMSO vs. pom kin pck TRT	-0.03534	-0.04486 to -0.02582	Yes	****	<0.0001	B-AM
	pom1as1 DMSO vs. shk kin pck DMSO	-0.002554	-0.01183 to 0.006719	No	ns	>0.9999	B-AO
	pom1as1 DMSO vs. shk kin pck TRT	-0.02881	-0.03848 to -0.01914	Yes	****	<0.0001	B-AP
	pom1as1 DMSO vs. W.T Cdc15 DMSO	-0.0001434	-0.009416 to 0.009129	No	ns	>0.9999	B-AR
	pom1as1 DMSO vs. W.T Cdc15 TRT	-0.001375	-0.01089 to 0.008142	No	ns	>0.9999	B-AS
	pom1as1Trt vs. kin1as1 0 min	0.02551	0.01230 to 0.03871	Yes	****	<0.0001	C-D
	pom1as1Trt vs. kin1as1 DMSO	0.02473	0.01489 to 0.03456	Yes	****	<0.0001	C-E
	pom1as1Trt vs. kin1as1 Trt	0.01479	0.004383 to 0.02520	Yes	****	<0.0001	C-F
	pom1as1Trt vs. shk1as2 0 min	0.02128	0.01134 to 0.03122	Yes	****	<0.0001	C-G
	pom1as1Trt vs. shk1as2 DMSO	0.02082	0.01132 to 0.03031	Yes	****	<0.0001	C-H
	pom1as1Trt vs. shk1as2 Trt	0.007533	-0.002080 to 0.01715	No	ns	0.4776	C-I
	pom1as1Trt vs. pck1as2 0 min	0.02494	0.01350 to 0.03638	Yes	****	<0.0001	C-J
	pom1as1Trt vs. pck1as2 DMSO	0.02486	0.01496 to 0.03476	Yes	****	<0.0001	C-K
	pom1as1Trt vs. pck1as2 Trt	0.0207	0.01076 to 0.03064	Yes	****	<0.0001	C-L
	pom1as1Trt vs. pom1as1shk1as2 0 min	0.02094	0.01098 to 0.03090	Yes	****	<0.0001	C-M
	pom1as1Trt vs. pom1as1shk1as2 DMSO	0.02115	0.01120 to 0.03111	Yes	****	<0.0001	C-N
	pom1as1Trt vs. pom1as1shk1as2 Trt	-0.02083	-0.03075 to -0.01091	Yes	****	<0.0001	C-O
	pom1as1Trt vs. pom1as1pck1as2 0 min	0.02017	0.006135 to 0.03421	Yes	****	<0.0001	C-P
	pom1as1Trt vs. pom1as1pck1as2 DMSO	0.02395	0.01403 to 0.03387	Yes	****	<0.0001	C-Q
	pom1as1Trt vs. pom1as1pck1as2 Trt	0.002495	-0.007444 to 0.01243	No	ns	>0.9999	C-R
	pom1as1Trt vs. pom1as1kin1as1 0 min	0.02378	0.009743 to 0.03782	Yes	****	<0.0001	C-S
	pom1as1Trt vs. pom1as1kin1as1 DMSO	0.0224	0.01234 to 0.03246	Yes	****	<0.0001	C-T
	pom1as1Trt vs. pom1as1kin1as1 Trt	-0.001369	-0.01145 to 0.008709	No	ns	>0.9999	C-U
	pom1as1Trt vs. shk1as2kin1as1 0 min	0.02101	0.006974 to 0.03505	Yes	****	<0.0001	C-V
	pom1as1Trt vs. shk1as2kin1as1 DMSO	0.02139	0.01137 to 0.03140	Yes	****	<0.0001	C-W
	pom1as1Trt vs. shk1as2kin1as1 Trt	-0.004057	-0.01431 to 0.006199	No	ns	>0.9999	C-X
	pom1as1Trt vs. kin1as1pck1as2 0 min	0.02455	0.01064 to 0.03845	Yes	****	<0.0001	C-Y
	pom1as1Trt vs. kin1as1pck1as2 DMSO	0.02438	0.01437 to 0.03440	Yes	****	<0.0001	C-Z
	pom1as1Trt vs. kin1as1pck1as2 Trt	0.00872	-0.001358 to 0.01880	No	ns	0.2422	C-AA
	pom1as1Trt vs. shk1as2pck1as2 0 min	0.02285	0.009424 to 0.03627	Yes	****	<0.0001	C-AB
	pom1as1Trt vs. shk1as2pck1as2 DMSO	0.02256	0.01264 to 0.03248	Yes	****	<0.0001	C-AC
	pom1as1Trt vs. shk1as2pck1as2 0 min	0.006692	-0.003637 to 0.01702	No	ns	0.8786	C-AD
	pom1as1Trt vs. pomkinshk DMSO	0.02049	0.01071 to 0.03027	Yes	****	<0.0001	C-AF
	pom1as1Trt vs. pomkinshk Trt	-0.03659	-0.04630 to -0.02687	Yes	****	<0.0001	C-AG
	pom1as1Trt vs. pomshkpck DMSO	0.02126	0.01172 to 0.03080	Yes	****	<0.0001	C-AI
	pom1as1Trt vs. pomshkpck TRT	-0.01529	-0.02485 to -0.005734	Yes	****	<0.0001	C-AJ
	pom1as1Trt vs. pom kin pck DMSO	0.02232	0.01242 to 0.03222	Yes	****	<0.0001	C-AL
	pom1as1Trt vs. pom kin pck TRT	-0.01137	-0.02122 to -0.001523	Yes	**	0.0046	C-AM
	pom1as1Trt vs. shk kin pck DMSO	0.02141	0.01180 to 0.03103	Yes	****	<0.0001	C-AO
	pom1as1Trt vs. shk kin pck TRT	-0.004839	-0.01484 to 0.005158	No	ns	0.9986	C-AP
	pom1as1Trt vs. W.T Cdc15 DMSO	0.02382	0.01421 to 0.03344	Yes	****	<0.0001	C-AR
	pom1as1Trt vs. W.T Cdc15 TRT	0.02259	0.01274 to 0.03244	Yes	****	<0.0001	C-AS
	kin1as1 0 min vs. kin1as1 DMSO	-0.000779	-0.01352 to 0.01196	No	ns	>0.9999	D-E
	kin1as1 0 min vs. kin1as1 Trt	-0.01072	-0.02390 to 0.002470	No	ns	0.3851	D-F
	kin1as1 0 min vs. shk1as2 0 min	-0.004228	-0.01705 to 0.008592	No	ns	>0.9999	D-G
	kin1as1 0 min vs. shk1as2 DMSO	-0.004689	-0.01717 to 0.007787	No	ns	>0.9999	D-H
	kin1as1 0 min vs. shk1as2 Trt	-0.01797	-0.03054 to -0.005404	Yes	****	<0.0001	D-I
	kin1as1 0 min vs. pck1as2 0 min	-0.0005647	-0.01458 to 0.01345	No	ns	>0.9999	D-J
	kin1as1 0 min vs. pck1as2 DMSO	-0.0006441	-0.01344 to 0.01215	No	ns	>0.9999	D-K
	kin1as1 0 min vs. pck1as2 Trt	-0.004806	-0.01763 to 0.008015	No	ns	>0.9999	D-L
	kin1as1 0 min vs. pom1as1shk1as2 0 min	-0.004567	-0.01740 to 0.008268	No	ns	>0.9999	D-M
	kin1as1 0 min vs. pom1as1shk1as2 DMSO	-0.004352	-0.01719 to 0.008483	No	ns	>0.9999	D-N
	kin1as1 0 min vs. pom1as1shk1as2 Trt	-0.04633	-0.05914 to -0.03353	Yes	****	<0.0001	D-O
	kin1as1 0 min vs. pom1as1pck1as2 0 min	-0.005331	-0.02154 to 0.01088	No	ns	>0.9999	D-P
	kin1as1 0 min vs. pom1as1pck1as2 DMSO	-0.001554	-0.01436 to 0.01125	No	ns	>0.9999	D-Q
	kin1as1 0 min vs. pom1as1pck1as2 Trt	-0.02301	-0.03583 to -0.01019	Yes	****	<0.0001	D-R
	kin1as1 0 min vs. pom1as1kin1as1 0 min	-0.001723	-0.01793 to 0.01448	No	ns	>0.9999	D-S
	kin1as1 0 min vs. pom1as1kin1as1 DMSO	-0.003105	-0.01602 to 0.009807	No	ns	>0.9999	D-T
	kin1as1 0 min vs. pom1as1kin1as1 Trt	-0.02687	-0.03980 to -0.01395	Yes	****	<0.0001	D-U
	kin1as1 0 min vs. shk1as2kin1as1 0 min	-0.004491	-0.02070 to 0.01172	No	ns	>0.9999	D-V
	kin1as1 0 min vs. shk1as2kin1as1 DMSO	-0.00412	-0.01700 to 0.008760	No	ns	>0.9999	D-W
	kin1as1 0 min vs. shk1as2kin1as1 Trt	-0.02956	-0.04263 to -0.01650	Yes	****	<0.0001	D-X
	kin1as1 0 min vs. kin1as1pck1as2 0 min	-0.0009562	-0.01705 to 0.01513	No	ns	>0.9999	D-Y
	kin1as1 0 min vs. kin1as1pck1as2 DMSO	-0.001121	-0.01400 to 0.01176	No	ns	>0.9999	D-Z
	kin1as1 0 min vs. kin1as1pck1as2 Trt	-0.01679	-0.02971 to -0.003857	Yes	***	0.0003	D-AA
	kin1as1 0 min vs. shk1as2pck1as2 0 min	-0.002659	-0.01833 to 0.01302	No	ns	>0.9999	D-AB
	kin1as1 0 min vs. shk1as2pck1as2 DMSO	-0.002942	-0.01575 to 0.009864	No	ns	>0.9999	D-AC
	kin1as1 0 min vs. shk1as2pck1as2 0 min	-0.01881	-0.03194 to -0.005688	Yes	****	<0.0001	D-AD
	kin1as1 0 min vs. pomkinshk DMSO	-0.005015	-0.01771 to 0.007683	No	ns	>0.9999	D-AF
	kin1as1 0 min vs. pomkinshk Trt	-0.06209	-0.07474 to -0.04944	Yes	****	<0.0001	D-AG
	kin1as1 0 min vs. pomshkpck DMSO	-0.004245	-0.01676 to 0.008271	No	ns	>0.9999	D-AI
	kin1as1 0 min vs. pomshkpck TRT	-0.0408	-0.05332 to -0.02827	Yes	****	<0.0001	D-AJ
	kin1as1 0 min vs. pom kin pck DMSO	-0.003187	-0.01598 to 0.009605	No	ns	>0.9999	D-AL
	kin1as1 0 min vs. pom kin pck TRT	-0.03688	-0.04963 to -0.02413	Yes	****	<0.0001	D-AM
	kin1as1 0 min vs. shk kin pck DMSO	-0.004092	-0.01666 to 0.008477	No	ns	>0.9999	D-AO
	kin1as1 0 min vs. shk kin pck TRT	-0.03034	-0.04321 to -0.01748	Yes	****	<0.0001	D-AP
	kin1as1 0 min vs. W.T Cdc15 DMSO	-0.001682	-0.01425 to 0.01089	No	ns	>0.9999	D-AR
	kin1as1 0 min vs. W.T Cdc15 TRT	-0.002913	-0.01566 to 0.009837	No	ns	>0.9999	D-AS
	kin1as1 DMSO vs. kin1as1 Trt	-0.009937	-0.01974 to -0.0001330	Yes	*	0.0415	E-F
	kin1as1 DMSO vs. shk1as2 0 min	-0.003449	-0.01276 to 0.005857	No	ns	>0.9999	E-G
	kin1as1 DMSO vs. shk1as2 DMSO	-0.00391	-0.01274 to 0.004917	No	ns	0.9998	E-H
	kin1as1 DMSO vs. shk1as2 Trt	-0.01719	-0.02615 to -0.008237	Yes	****	<0.0001	E-I
	kin1as1 DMSO vs. pck1as2 0 min	0.0002143	-0.01068 to 0.01111	No	ns	>0.9999	E-J
	kin1as1 DMSO vs. pck1as2 DMSO	0.0001349	-0.009132 to 0.009401	No	ns	>0.9999	E-K
	kin1as1 DMSO vs. pck1as2 Trt	-0.004027	-0.01333 to 0.005279	No	ns	0.9999	E-L
	kin1as1 DMSO vs. pom1as1shk1as2 0 min	-0.003788	-0.01311 to 0.005539	No	ns	>0.9999	E-M
	kin1as1 DMSO vs. pom1as1shk1as2 DMSO	-0.003573	-0.01290 to 0.005754	No	ns	>0.9999	E-N
	kin1as1 DMSO vs. pom1as1shk1as2 Trt	-0.04555	-0.05484 to -0.03627	Yes	****	<0.0001	E-O
	kin1as1 DMSO vs. pom1as1pck1as2 0 min	-0.004552	-0.01815 to 0.009047	No	ns	>0.9999	E-P
	kin1as1 DMSO vs. pom1as1pck1as2 DMSO	-0.0007747	-0.01006 to 0.008512	No	ns	>0.9999	E-Q
	kin1as1 DMSO vs. pom1as1pck1as2 Trt	-0.02223	-0.03154 to -0.01292	Yes	****	<0.0001	E-R
	kin1as1 DMSO vs. pom1as1kin1as1 0 min	-0.0009436	-0.01454 to 0.01266	No	ns	>0.9999	E-S
	kin1as1 DMSO vs. pom1as1kin1as1 DMSO	-0.002326	-0.01176 to 0.007106	No	ns	>0.9999	E-T
	kin1as1 DMSO vs. pom1as1kin1as1 Trt	-0.02609	-0.03555 to -0.01664	Yes	****	<0.0001	E-U
	kin1as1 DMSO vs. shk1as2kin1as1 0 min	-0.003712	-0.01731 to 0.009887	No	ns	>0.9999	E-V
	kin1as1 DMSO vs. shk1as2kin1as1 DMSO	-0.003341	-0.01273 to 0.006048	No	ns	>0.9999	E-W
	kin1as1 DMSO vs. shk1as2kin1as1 Trt	-0.02878	-0.03843 to -0.01914	Yes	****	<0.0001	E-X
	kin1as1 DMSO vs. kin1as1pck1as2 0 min	-0.0001772	-0.01364 to 0.01328	No	ns	>0.9999	E-Y
	kin1as1 DMSO vs. kin1as1pck1as2 DMSO	-0.0003422	-0.009731 to 0.009046	No	ns	>0.9999	E-Z
	kin1as1 DMSO vs. kin1as1pck1as2 Trt	-0.01601	-0.02546 to -0.006552	Yes	****	<0.0001	E-AA
	kin1as1 DMSO vs. shk1as2pck1as2 0 min	-0.00188	-0.01484 to 0.01108	No	ns	>0.9999	E-AB
	kin1as1 DMSO vs. shk1as2pck1as2 DMSO	-0.002163	-0.01145 to 0.007124	No	ns	>0.9999	E-AC
	kin1as1 DMSO vs. shk1as2pck1as2 0 min	-0.01803	-0.02776 to -0.008312	Yes	****	<0.0001	E-AD
	kin1as1 DMSO vs. pomkinshk DMSO	-0.004236	-0.01337 to 0.004901	No	ns	0.9994	E-AF
	kin1as1 DMSO vs. pomkinshk Trt	-0.06131	-0.07038 to -0.05225	Yes	****	<0.0001	E-AG
	kin1as1 DMSO vs. pomshkpck DMSO	-0.003466	-0.01235 to 0.005417	No	ns	>0.9999	E-AI
	kin1as1 DMSO vs. pomshkpck TRT	-0.04002	-0.04892 to -0.03112	Yes	****	<0.0001	E-AJ
	kin1as1 DMSO vs. pom kin pck DMSO	-0.002408	-0.01167 to 0.006859	No	ns	>0.9999	E-AL
	kin1as1 DMSO vs. pom kin pck TRT	-0.0361	-0.04531 to -0.02689	Yes	****	<0.0001	E-AM
	kin1as1 DMSO vs. shk kin pck DMSO	-0.003313	-0.01227 to 0.005643	No	ns	>0.9999	E-AO
	kin1as1 DMSO vs. shk kin pck TRT	-0.02957	-0.03893 to -0.02020	Yes	****	<0.0001	E-AP
	kin1as1 DMSO vs. W.T Cdc15 DMSO	-0.0009028	-0.009859 to 0.008054	No	ns	>0.9999	E-AR
	kin1as1 DMSO vs. W.T Cdc15 TRT	-0.002134	-0.01134 to 0.007075	No	ns	>0.9999	E-AS
	kin1as1 Trt vs. shk1as2 0 min	0.006487	-0.003424 to 0.01640	No	ns	0.8649	F-G
	kin1as1 Trt vs. shk1as2 DMSO	0.006026	-0.003436 to 0.01549	No	ns	0.8993	F-H
	kin1as1 Trt vs. shk1as2 Trt	-0.007257	-0.01684 to 0.002327	No	ns	0.5659	F-I
	kin1as1 Trt vs. pck1as2 0 min	0.01015	-0.001268 to 0.02157	No	ns	0.1908	F-J
	kin1as1 Trt vs. pck1as2 DMSO	0.01007	0.0001969 to 0.01995	Yes	*	0.038	F-K
	kin1as1 Trt vs. pck1as2 Trt	0.00591	-0.004002 to 0.01582	No	ns	0.955	F-L
	kin1as1 Trt vs. pom1as1shk1as2 0 min	0.006149	-0.003782 to 0.01608	No	ns	0.9274	F-M
	kin1as1 Trt vs. pom1as1shk1as2 DMSO	0.006364	-0.003566 to 0.01629	No	ns	0.892	F-N
	kin1as1 Trt vs. pom1as1shk1as2 Trt	-0.03562	-0.04551 to -0.02572	Yes	****	<0.0001	F-O
	kin1as1 Trt vs. pom1as1pck1as2 0 min	0.005385	-0.008635 to 0.01941	No	ns	>0.9999	F-P
	kin1as1 Trt vs. pom1as1pck1as2 DMSO	0.009162	-0.0007310 to 0.01905	No	ns	0.1267	F-Q
	kin1as1 Trt vs. pom1as1pck1as2 Trt	-0.01229	-0.02221 to -0.002383	Yes	**	0.001	F-R
	kin1as1 Trt vs. pom1as1kin1as1 0 min	0.008993	-0.005027 to 0.02301	No	ns	0.891	F-S
	kin1as1 Trt vs. pom1as1kin1as1 DMSO	0.007611	-0.002419 to 0.01764	No	ns	0.5602	F-T
	kin1as1 Trt vs. pom1as1kin1as1 Trt	-0.01616	-0.02621 to -0.006108	Yes	****	<0.0001	F-U
	kin1as1 Trt vs. shk1as2kin1as1 0 min	0.006225	-0.007795 to 0.02025	No	ns	0.9998	F-V
	kin1as1 Trt vs. shk1as2kin1as1 DMSO	0.006596	-0.003394 to 0.01658	No	ns	0.8524	F-W
	kin1as1 Trt vs. shk1as2kin1as1 Trt	-0.01885	-0.02908 to -0.008618	Yes	****	<0.0001	F-X
	kin1as1 Trt vs. kin1as1pck1as2 0 min	0.009759	-0.004126 to 0.02364	No	ns	0.7408	F-Y
	kin1as1 Trt vs. kin1as1pck1as2 DMSO	0.009594	-0.0003948 to 0.01958	No	ns	0.0838	F-Z
	kin1as1 Trt vs. kin1as1pck1as2 Trt	-0.00607	-0.01612 to 0.003981	No	ns	0.9468	F-AA
	kin1as1 Trt vs. shk1as2pck1as2 0 min	0.008056	-0.005345 to 0.02146	No	ns	0.9499	F-AB
	kin1as1 Trt vs. shk1as2pck1as2 DMSO	0.007774	-0.002119 to 0.01767	No	ns	0.4703	F-AC
	kin1as1 Trt vs. shk1as2pck1as2 0 min	-0.008097	-0.01840 to 0.002205	No	ns	0.4699	F-AD
	kin1as1 Trt vs. pomkinshk DMSO	0.005701	-0.004052 to 0.01545	No	ns	0.9657	F-AF
	kin1as1 Trt vs. pomkinshk Trt	-0.05138	-0.06107 to -0.04169	Yes	****	<0.0001	F-AG
	kin1as1 Trt vs. pomshkpck DMSO	0.006471	-0.003044 to 0.01599	No	ns	0.8045	F-AI
	kin1as1 Trt vs. pomshkpck TRT	-0.03008	-0.03961 to -0.02055	Yes	****	<0.0001	F-AJ
	kin1as1 Trt vs. pom kin pck DMSO	0.007529	-0.002346 to 0.01740	No	ns	0.5481	F-AL
	kin1as1 Trt vs. pom kin pck TRT	-0.02616	-0.03598 to -0.01634	Yes	****	<0.0001	F-AM
	kin1as1 Trt vs. shk kin pck DMSO	0.006623	-0.002961 to 0.01621	No	ns	0.7747	F-AO
	kin1as1 Trt vs. shk kin pck TRT	-0.01963	-0.02960 to -0.009659	Yes	****	<0.0001	F-AP
	kin1as1 Trt vs. W.T Cdc15 DMSO	0.009034	-0.0005504 to 0.01862	No	ns	0.1044	F-AR
	kin1as1 Trt vs. W.T Cdc15 TRT	0.007802	-0.002018 to 0.01762	No	ns	0.4422	F-AS
	shk1as2 0 min vs. shk1as2 DMSO	-0.000461	-0.009407 to 0.008486	No	ns	>0.9999	G-H
	shk1as2 0 min vs. shk1as2 Trt	-0.01374	-0.02282 to -0.004670	Yes	****	<0.0001	G-I
	shk1as2 0 min vs. pck1as2 0 min	0.003663	-0.007331 to 0.01466	No	ns	>0.9999	G-J
	shk1as2 0 min vs. pck1as2 DMSO	0.003584	-0.005797 to 0.01296	No	ns	>0.9999	G-K
	shk1as2 0 min vs. pck1as2 Trt	-0.0005774	-0.009997 to 0.008842	No	ns	>0.9999	G-L
	shk1as2 0 min vs. pom1as1shk1as2 0 min	-0.0003386	-0.009778 to 0.009101	No	ns	>0.9999	G-M
	shk1as2 0 min vs. pom1as1shk1as2 DMSO	-0.0001234	-0.009563 to 0.009316	No	ns	>0.9999	G-N
	shk1as2 0 min vs. pom1as1shk1as2 Trt	-0.04211	-0.05151 to -0.03271	Yes	****	<0.0001	G-O
	shk1as2 0 min vs. pom1as1pck1as2 0 min	-0.001103	-0.01478 to 0.01257	No	ns	>0.9999	G-P
	shk1as2 0 min vs. pom1as1pck1as2 DMSO	0.002674	-0.006726 to 0.01207	No	ns	>0.9999	G-Q
	shk1as2 0 min vs. pom1as1pck1as2 Trt	-0.01878	-0.02820 to -0.009362	Yes	****	<0.0001	G-R
	shk1as2 0 min vs. pom1as1kin1as1 0 min	0.002506	-0.01117 to 0.01618	No	ns	>0.9999	G-S
	shk1as2 0 min vs. pom1as1kin1as1 DMSO	0.001124	-0.008420 to 0.01067	No	ns	>0.9999	G-T
	shk1as2 0 min vs. pom1as1kin1as1 Trt	-0.02265	-0.03221 to -0.01308	Yes	****	<0.0001	G-U
	shk1as2 0 min vs. shk1as2kin1as1 0 min	-0.0002626	-0.01394 to 0.01341	No	ns	>0.9999	G-V
	shk1as2 0 min vs. shk1as2kin1as1 DMSO	0.0001081	-0.009393 to 0.009609	No	ns	>0.9999	G-W
	shk1as2 0 min vs. shk1as2kin1as1 Trt	-0.02533	-0.03509 to -0.01558	Yes	****	<0.0001	G-X
	shk1as2 0 min vs. kin1as1pck1as2 0 min	0.003272	-0.01027 to 0.01681	No	ns	>0.9999	G-Y
	shk1as2 0 min vs. kin1as1pck1as2 DMSO	0.003107	-0.006394 to 0.01261	No	ns	>0.9999	G-Z
	shk1as2 0 min vs. kin1as1pck1as2 Trt	-0.01256	-0.02212 to -0.002991	Yes	***	0.0002	G-AA
	shk1as2 0 min vs. shk1as2pck1as2 0 min	0.001569	-0.01147 to 0.01461	No	ns	>0.9999	G-AB
	shk1as2 0 min vs. shk1as2pck1as2 DMSO	0.001287	-0.008114 to 0.01069	No	ns	>0.9999	G-AC
	shk1as2 0 min vs. shk1as2pck1as2 0 min	-0.01458	-0.02442 to -0.004754	Yes	****	<0.0001	G-AD
	shk1as2 0 min vs. pomkinshk DMSO	-0.0007866	-0.01004 to 0.008466	No	ns	>0.9999	G-AF
	shk1as2 0 min vs. pomkinshk Trt	-0.05786	-0.06705 to -0.04868	Yes	****	<0.0001	G-AG
	shk1as2 0 min vs. pomshkpck DMSO	-1.673e-05	-0.009018 to 0.008985	No	ns	>0.9999	G-AI
	shk1as2 0 min vs. pomshkpck TRT	-0.03657	-0.04559 to -0.02755	Yes	****	<0.0001	G-AJ
	shk1as2 0 min vs. pom kin pck DMSO	0.001041	-0.008339 to 0.01042	No	ns	>0.9999	G-AL
	shk1as2 0 min vs. pom kin pck TRT	-0.03265	-0.04197 to -0.02333	Yes	****	<0.0001	G-AM
	shk1as2 0 min vs. shk kin pck DMSO	0.000136	-0.008939 to 0.009211	No	ns	>0.9999	G-AO
	shk1as2 0 min vs. shk kin pck TRT	-0.02612	-0.03560 to -0.01664	Yes	****	<0.0001	G-AP
	shk1as2 0 min vs. W.T Cdc15 DMSO	0.002546	-0.006528 to 0.01162	No	ns	>0.9999	G-AR
	shk1as2 0 min vs. W.T Cdc15 TRT	0.001315	-0.008009 to 0.01064	No	ns	>0.9999	G-AS
	shk1as2 DMSO vs. shk1as2 Trt	-0.01328	-0.02187 to -0.004701	Yes	****	<0.0001	H-I
	shk1as2 DMSO vs. pck1as2 0 min	0.004124	-0.006468 to 0.01472	No	ns	>0.9999	H-J
	shk1as2 DMSO vs. pck1as2 DMSO	0.004045	-0.004860 to 0.01295	No	ns	0.9996	H-K
	shk1as2 DMSO vs. pck1as2 Trt	-0.0001165	-0.009063 to 0.008830	No	ns	>0.9999	H-L
	shk1as2 DMSO vs. pom1as1shk1as2 0 min	0.0001224	-0.008845 to 0.009090	No	ns	>0.9999	H-M
	shk1as2 DMSO vs. pom1as1shk1as2 DMSO	0.0003376	-0.008630 to 0.009305	No	ns	>0.9999	H-N
	shk1as2 DMSO vs. pom1as1shk1as2 Trt	-0.04164	-0.05057 to -0.03272	Yes	****	<0.0001	H-O
	shk1as2 DMSO vs. pom1as1pck1as2 0 min	-0.0006415	-0.01400 to 0.01271	No	ns	>0.9999	H-P
	shk1as2 DMSO vs. pom1as1pck1as2 DMSO	0.003135	-0.005790 to 0.01206	No	ns	>0.9999	H-Q
	shk1as2 DMSO vs. pom1as1pck1as2 Trt	-0.01832	-0.02727 to -0.009374	Yes	****	<0.0001	H-R
	shk1as2 DMSO vs. pom1as1kin1as1 0 min	0.002967	-0.01039 to 0.01632	No	ns	>0.9999	H-S
	shk1as2 DMSO vs. pom1as1kin1as1 DMSO	0.001584	-0.007493 to 0.01066	No	ns	>0.9999	H-T
	shk1as2 DMSO vs. pom1as1kin1as1 Trt	-0.02218	-0.03128 to -0.01308	Yes	****	<0.0001	H-U
	shk1as2 DMSO vs. shk1as2kin1as1 0 min	0.0001983	-0.01316 to 0.01355	No	ns	>0.9999	H-V
	shk1as2 DMSO vs. shk1as2kin1as1 DMSO	0.000569	-0.008463 to 0.009601	No	ns	>0.9999	H-W
	shk1as2 DMSO vs. shk1as2kin1as1 Trt	-0.02487	-0.03417 to -0.01558	Yes	****	<0.0001	H-X
	shk1as2 DMSO vs. kin1as1pck1as2 0 min	0.003733	-0.009481 to 0.01695	No	ns	>0.9999	H-Y
	shk1as2 DMSO vs. kin1as1pck1as2 DMSO	0.003568	-0.005464 to 0.01260	No	ns	>0.9999	H-Z
	shk1as2 DMSO vs. kin1as1pck1as2 Trt	-0.0121	-0.02120 to -0.002996	Yes	***	0.0002	H-AA
	shk1as2 DMSO vs. shk1as2pck1as2 0 min	0.00203	-0.01067 to 0.01473	No	ns	>0.9999	H-AB
	shk1as2 DMSO vs. shk1as2pck1as2 DMSO	0.001748	-0.007178 to 0.01067	No	ns	>0.9999	H-AC
	shk1as2 DMSO vs. shk1as2pck1as2 0 min	-0.01412	-0.02350 to -0.004746	Yes	****	<0.0001	H-AD
	shk1as2 DMSO vs. pomkinshk DMSO	-0.0003257	-0.009096 to 0.008445	No	ns	>0.9999	H-AF
	shk1as2 DMSO vs. pomkinshk Trt	-0.0574	-0.06610 to -0.04870	Yes	****	<0.0001	H-AG
	shk1as2 DMSO vs. pomshkpck DMSO	0.0004442	-0.008061 to 0.008949	No	ns	>0.9999	H-AI
	shk1as2 DMSO vs. pomshkpck TRT	-0.03611	-0.04463 to -0.02759	Yes	****	<0.0001	H-AJ
	shk1as2 DMSO vs. pom kin pck DMSO	0.001502	-0.007403 to 0.01041	No	ns	>0.9999	H-AL
	shk1as2 DMSO vs. pom kin pck TRT	-0.03219	-0.04103 to -0.02334	Yes	****	<0.0001	H-AM
	shk1as2 DMSO vs. shk kin pck DMSO	0.000597	-0.007985 to 0.009179	No	ns	>0.9999	H-AO
	shk1as2 DMSO vs. shk kin pck TRT	-0.02565	-0.03467 to -0.01664	Yes	****	<0.0001	H-AP
	shk1as2 DMSO vs. W.T Cdc15 DMSO	0.003007	-0.005575 to 0.01159	No	ns	>0.9999	H-AR
	shk1as2 DMSO vs. W.T Cdc15 TRT	0.001776	-0.007070 to 0.01062	No	ns	>0.9999	H-AS
	shk1as2 Trt vs. pck1as2 0 min	0.01741	0.006707 to 0.02811	Yes	****	<0.0001	I-J
	shk1as2 Trt vs. pck1as2 DMSO	0.01733	0.008294 to 0.02636	Yes	****	<0.0001	I-K
	shk1as2 Trt vs. pck1as2 Trt	0.01317	0.004092 to 0.02224	Yes	****	<0.0001	I-L
	shk1as2 Trt vs. pom1as1shk1as2 0 min	0.01341	0.004310 to 0.02250	Yes	****	<0.0001	I-M
	shk1as2 Trt vs. pom1as1shk1as2 DMSO	0.01362	0.004525 to 0.02272	Yes	****	<0.0001	I-N
	shk1as2 Trt vs. pom1as1shk1as2 Trt	-0.02836	-0.03742 to -0.01931	Yes	****	<0.0001	I-O
	shk1as2 Trt vs. pom1as1pck1as2 0 min	0.01264	-0.0007999 to 0.02608	No	ns	0.107	I-P
	shk1as2 Trt vs. pom1as1pck1as2 DMSO	0.01642	0.007364 to 0.02547	Yes	****	<0.0001	I-Q
	shk1as2 Trt vs. pom1as1pck1as2 Trt	-0.005038	-0.01411 to 0.004037	No	ns	0.984	I-R
	shk1as2 Trt vs. pom1as1kin1as1 0 min	0.01625	0.002808 to 0.02969	Yes	**	0.0018	I-S
	shk1as2 Trt vs. pom1as1kin1as1 DMSO	0.01487	0.005664 to 0.02407	Yes	****	<0.0001	I-T
	shk1as2 Trt vs. pom1as1kin1as1 Trt	-0.008902	-0.01813 to 0.0003246	No	ns	0.0793	I-U
	shk1as2 Trt vs. shk1as2kin1as1 0 min	0.01348	4.000e-005 to 0.02692	Yes	*	0.048	I-V
	shk1as2 Trt vs. shk1as2kin1as1 DMSO	0.01385	0.004693 to 0.02301	Yes	****	<0.0001	I-W
	shk1as2 Trt vs. shk1as2kin1as1 Trt	-0.01159	-0.02101 to -0.002170	Yes	**	0.0012	I-X
	shk1as2 Trt vs. kin1as1pck1as2 0 min	0.01702	0.003715 to 0.03032	Yes	***	0.0005	I-Y
	shk1as2 Trt vs. kin1as1pck1as2 DMSO	0.01685	0.007692 to 0.02601	Yes	****	<0.0001	I-Z
	shk1as2 Trt vs. kin1as1pck1as2 Trt	0.001187	-0.008039 to 0.01041	No	ns	>0.9999	I-AA
	shk1as2 Trt vs. shk1as2pck1as2 0 min	0.01531	0.002519 to 0.02811	Yes	**	0.0022	I-AB
	shk1as2 Trt vs. shk1as2pck1as2 DMSO	0.01503	0.005976 to 0.02408	Yes	****	<0.0001	I-AC
	shk1as2 Trt vs. shk1as2pck1as2 0 min	-0.0008406	-0.01034 to 0.008660	No	ns	>0.9999	I-AD
	shk1as2 Trt vs. pomkinshk DMSO	0.01296	0.004056 to 0.02186	Yes	****	<0.0001	I-AF
	shk1as2 Trt vs. pomkinshk Trt	-0.04412	-0.05295 to -0.03529	Yes	****	<0.0001	I-AG
	shk1as2 Trt vs. pomshkpck DMSO	0.01373	0.005088 to 0.02237	Yes	****	<0.0001	I-AI
	shk1as2 Trt vs. pomshkpck TRT	-0.02283	-0.03148 to -0.01417	Yes	****	<0.0001	I-AJ
	shk1as2 Trt vs. pom kin pck DMSO	0.01479	0.005751 to 0.02382	Yes	****	<0.0001	I-AL
	shk1as2 Trt vs. pom kin pck TRT	-0.01891	-0.02788 to -0.009930	Yes	****	<0.0001	I-AM
	shk1as2 Trt vs. shk kin pck DMSO	0.01388	0.005164 to 0.02260	Yes	****	<0.0001	I-AO
	shk1as2 Trt vs. shk kin pck TRT	-0.01237	-0.02151 to -0.003234	Yes	***	0.0001	I-AP
	shk1as2 Trt vs. W.T Cdc15 DMSO	0.01629	0.007575 to 0.02501	Yes	****	<0.0001	I-AR
	shk1as2 Trt vs. W.T Cdc15 TRT	0.01506	0.006084 to 0.02403	Yes	****	<0.0001	I-AS
	pck1as2 0 min vs. pck1as2 DMSO	-7.941e-05	-0.01104 to 0.01088	No	ns	>0.9999	J-K
	pck1as2 0 min vs. pck1as2 Trt	-0.004241	-0.01524 to 0.006754	No	ns	>0.9999	J-L
	pck1as2 0 min vs. pom1as1shk1as2 0 min	-0.004002	-0.01501 to 0.007010	No	ns	>0.9999	J-M
	pck1as2 0 min vs. pom1as1shk1as2 DMSO	-0.003787	-0.01480 to 0.007225	No	ns	>0.9999	J-N
	pck1as2 0 min vs. pom1as1shk1as2 Trt	-0.04577	-0.05675 to -0.03479	Yes	****	<0.0001	J-O
	pck1as2 0 min vs. pom1as1pck1as2 0 min	-0.004766	-0.01957 to 0.01004	No	ns	>0.9999	J-P
	pck1as2 0 min vs. pom1as1pck1as2 DMSO	-0.000989	-0.01197 to 0.009989	No	ns	>0.9999	J-Q
	pck1as2 0 min vs. pom1as1pck1as2 Trt	-0.02245	-0.03344 to -0.01145	Yes	****	<0.0001	J-R
	pck1as2 0 min vs. pom1as1kin1as1 0 min	-0.001158	-0.01596 to 0.01365	No	ns	>0.9999	J-S
	pck1as2 0 min vs. pom1as1kin1as1 DMSO	-0.00254	-0.01364 to 0.008561	No	ns	>0.9999	J-T
	pck1as2 0 min vs. pom1as1kin1as1 Trt	-0.02631	-0.03743 to -0.01519	Yes	****	<0.0001	J-U
	pck1as2 0 min vs. shk1as2kin1as1 0 min	-0.003926	-0.01873 to 0.01088	No	ns	>0.9999	J-V
	pck1as2 0 min vs. shk1as2kin1as1 DMSO	-0.003555	-0.01462 to 0.007509	No	ns	>0.9999	J-W
	pck1as2 0 min vs. shk1as2kin1as1 Trt	-0.029	-0.04028 to -0.01772	Yes	****	<0.0001	J-X
	pck1as2 0 min vs. kin1as1pck1as2 0 min	-0.0003915	-0.01507 to 0.01429	No	ns	>0.9999	J-Y
	pck1as2 0 min vs. kin1as1pck1as2 DMSO	-0.0005565	-0.01162 to 0.01051	No	ns	>0.9999	J-Z
	pck1as2 0 min vs. kin1as1pck1as2 Trt	-0.01622	-0.02734 to -0.005100	Yes	****	<0.0001	J-AA
	pck1as2 0 min vs. shk1as2pck1as2 0 min	-0.002095	-0.01632 to 0.01213	No	ns	>0.9999	J-AB
	pck1as2 0 min vs. shk1as2pck1as2 DMSO	-0.002377	-0.01335 to 0.008601	No	ns	>0.9999	J-AC
	pck1as2 0 min vs. shk1as2pck1as2 0 min	-0.01825	-0.02960 to -0.006900	Yes	****	<0.0001	J-AD
	pck1as2 0 min vs. pomkinshk DMSO	-0.00445	-0.01530 to 0.006402	No	ns	>0.9999	J-AF
	pck1as2 0 min vs. pomkinshk Trt	-0.06153	-0.07232 to -0.05073	Yes	****	<0.0001	J-AG
	pck1as2 0 min vs. pomshkpck DMSO	-0.00368	-0.01432 to 0.006958	No	ns	>0.9999	J-AI
	pck1as2 0 min vs. pomshkpck TRT	-0.04023	-0.05088 to -0.02958	Yes	****	<0.0001	J-AJ
	pck1as2 0 min vs. pom kin pck DMSO	-0.002622	-0.01358 to 0.008339	No	ns	>0.9999	J-AL
	pck1as2 0 min vs. pom kin pck TRT	-0.03631	-0.04723 to -0.02540	Yes	****	<0.0001	J-AM
	pck1as2 0 min vs. shk kin pck DMSO	-0.003527	-0.01423 to 0.007173	No	ns	>0.9999	J-AO
	pck1as2 0 min vs. shk kin pck TRT	-0.02978	-0.04083 to -0.01873	Yes	****	<0.0001	J-AP
	pck1as2 0 min vs. W.T Cdc15 DMSO	-0.001117	-0.01182 to 0.009583	No	ns	>0.9999	J-AR
	pck1as2 0 min vs. W.T Cdc15 TRT	-0.002348	-0.01326 to 0.008565	No	ns	>0.9999	J-AS
	pck1as2 DMSO vs. pck1as2 Trt	-0.004161	-0.01354 to 0.005219	No	ns	0.9998	K-L
	pck1as2 DMSO vs. pom1as1shk1as2 0 min	-0.003923	-0.01332 to 0.005478	No	ns	>0.9999	K-M
	pck1as2 DMSO vs. pom1as1shk1as2 DMSO	-0.003707	-0.01311 to 0.005693	No	ns	>0.9999	K-N
	pck1as2 DMSO vs. pom1as1shk1as2 Trt	-0.04569	-0.05505 to -0.03633	Yes	****	<0.0001	K-O
	pck1as2 DMSO vs. pom1as1pck1as2 0 min	-0.004687	-0.01834 to 0.008964	No	ns	>0.9999	K-P
	pck1as2 DMSO vs. pom1as1pck1as2 DMSO	-0.0009095	-0.01027 to 0.008452	No	ns	>0.9999	K-Q
	pck1as2 DMSO vs. pom1as1pck1as2 Trt	-0.02237	-0.03175 to -0.01299	Yes	****	<0.0001	K-R
	pck1as2 DMSO vs. pom1as1kin1as1 0 min	-0.001078	-0.01473 to 0.01257	No	ns	>0.9999	K-S
	pck1as2 DMSO vs. pom1as1kin1as1 DMSO	-0.00246	-0.01197 to 0.007045	No	ns	>0.9999	K-T
	pck1as2 DMSO vs. pom1as1kin1as1 Trt	-0.02623	-0.03576 to -0.01670	Yes	****	<0.0001	K-U
	pck1as2 DMSO vs. shk1as2kin1as1 0 min	-0.003847	-0.01750 to 0.009803	No	ns	>0.9999	K-V
	pck1as2 DMSO vs. shk1as2kin1as1 DMSO	-0.003476	-0.01294 to 0.005987	No	ns	>0.9999	K-W
	pck1as2 DMSO vs. shk1as2kin1as1 Trt	-0.02892	-0.03863 to -0.01920	Yes	****	<0.0001	K-X
	pck1as2 DMSO vs. kin1as1pck1as2 0 min	-0.0003121	-0.01382 to 0.01320	No	ns	>0.9999	K-Y
	pck1as2 DMSO vs. kin1as1pck1as2 DMSO	-0.0004771	-0.009940 to 0.008986	No	ns	>0.9999	K-Z
	pck1as2 DMSO vs. kin1as1pck1as2 Trt	-0.01614	-0.02567 to -0.006614	Yes	****	<0.0001	K-AA
	pck1as2 DMSO vs. shk1as2pck1as2 0 min	-0.002015	-0.01503 to 0.01100	No	ns	>0.9999	K-AB
	pck1as2 DMSO vs. shk1as2pck1as2 DMSO	-0.002297	-0.01166 to 0.007064	No	ns	>0.9999	K-AC
	pck1as2 DMSO vs. shk1as2pck1as2 0 min	-0.01817	-0.02796 to -0.008376	Yes	****	<0.0001	K-AD
	pck1as2 DMSO vs. pomkinshk DMSO	-0.004371	-0.01358 to 0.004842	No	ns	0.9991	K-AF
	pck1as2 DMSO vs. pomkinshk Trt	-0.06145	-0.07059 to -0.05230	Yes	****	<0.0001	K-AG
	pck1as2 DMSO vs. pomshkpck DMSO	-0.003601	-0.01256 to 0.005360	No	ns	>0.9999	K-AI
	pck1as2 DMSO vs. pomshkpck TRT	-0.04015	-0.04913 to -0.03118	Yes	****	<0.0001	K-AJ
	pck1as2 DMSO vs. pom kin pck DMSO	-0.002543	-0.01188 to 0.006799	No	ns	>0.9999	K-AL
	pck1as2 DMSO vs. pom kin pck TRT	-0.03623	-0.04552 to -0.02695	Yes	****	<0.0001	K-AM
	pck1as2 DMSO vs. shk kin pck DMSO	-0.003448	-0.01248 to 0.005586	No	ns	>0.9999	K-AO
	pck1as2 DMSO vs. shk kin pck TRT	-0.0297	-0.03914 to -0.02026	Yes	****	<0.0001	K-AP
	pck1as2 DMSO vs. W.T Cdc15 DMSO	-0.001038	-0.01007 to 0.007996	No	ns	>0.9999	K-AR
	pck1as2 DMSO vs. W.T Cdc15 TRT	-0.002269	-0.01155 to 0.007016	No	ns	>0.9999	K-AS
	pck1as2 Trt vs. pom1as1shk1as2 0 min	0.0002389	-0.009201 to 0.009679	No	ns	>0.9999	L-M
	pck1as2 Trt vs. pom1as1shk1as2 DMSO	0.000454	-0.008986 to 0.009894	No	ns	>0.9999	L-N
	pck1as2 Trt vs. pom1as1shk1as2 Trt	-0.04153	-0.05093 to -0.03213	Yes	****	<0.0001	L-O
	pck1as2 Trt vs. pom1as1pck1as2 0 min	-0.0005251	-0.01420 to 0.01315	No	ns	>0.9999	L-P
	pck1as2 Trt vs. pom1as1pck1as2 DMSO	0.003252	-0.006148 to 0.01265	No	ns	>0.9999	L-Q
	pck1as2 Trt vs. pom1as1pck1as2 Trt	-0.0182	-0.02762 to -0.008785	Yes	****	<0.0001	L-R
	pck1as2 Trt vs. pom1as1kin1as1 0 min	0.003083	-0.01059 to 0.01676	No	ns	>0.9999	L-S
	pck1as2 Trt vs. pom1as1kin1as1 DMSO	0.001701	-0.007843 to 0.01124	No	ns	>0.9999	L-T
	pck1as2 Trt vs. pom1as1kin1as1 Trt	-0.02207	-0.03163 to -0.01250	Yes	****	<0.0001	L-U
	pck1as2 Trt vs. shk1as2kin1as1 0 min	0.0003148	-0.01336 to 0.01399	No	ns	>0.9999	L-V
	pck1as2 Trt vs. shk1as2kin1as1 DMSO	0.0006855	-0.008816 to 0.01019	No	ns	>0.9999	L-W
	pck1as2 Trt vs. shk1as2kin1as1 Trt	-0.02476	-0.03451 to -0.01500	Yes	****	<0.0001	L-X
	pck1as2 Trt vs. kin1as1pck1as2 0 min	0.003849	-0.009690 to 0.01739	No	ns	>0.9999	L-Y
	pck1as2 Trt vs. kin1as1pck1as2 DMSO	0.003684	-0.005817 to 0.01319	No	ns	>0.9999	L-Z
	pck1as2 Trt vs. kin1as1pck1as2 Trt	-0.01198	-0.02155 to -0.002414	Yes	***	0.0008	L-AA
	pck1as2 Trt vs. shk1as2pck1as2 0 min	0.002146	-0.01090 to 0.01519	No	ns	>0.9999	L-AB
	pck1as2 Trt vs. shk1as2pck1as2 DMSO	0.001864	-0.007536 to 0.01126	No	ns	>0.9999	L-AC
	pck1as2 Trt vs. shk1as2pck1as2 0 min	-0.01401	-0.02384 to -0.004177	Yes	****	<0.0001	L-AD
	pck1as2 Trt vs. pomkinshk DMSO	-0.0002092	-0.009462 to 0.009044	No	ns	>0.9999	L-AF
	pck1as2 Trt vs. pomkinshk Trt	-0.05729	-0.06647 to -0.04810	Yes	****	<0.0001	L-AG
	pck1as2 Trt vs. pomshkpck DMSO	0.0005607	-0.008441 to 0.009562	No	ns	>0.9999	L-AI
	pck1as2 Trt vs. pomshkpck TRT	-0.03599	-0.04501 to -0.02698	Yes	****	<0.0001	L-AJ
	pck1as2 Trt vs. pom kin pck DMSO	0.001619	-0.007762 to 0.01100	No	ns	>0.9999	L-AL
	pck1as2 Trt vs. pom kin pck TRT	-0.03207	-0.04140 to -0.02275	Yes	****	<0.0001	L-AM
	pck1as2 Trt vs. shk kin pck DMSO	0.0007135	-0.008361 to 0.009788	No	ns	>0.9999	L-AO
	pck1as2 Trt vs. shk kin pck TRT	-0.02554	-0.03502 to -0.01606	Yes	****	<0.0001	L-AP
	pck1as2 Trt vs. W.T Cdc15 DMSO	0.003124	-0.005951 to 0.01220	No	ns	>0.9999	L-AR
	pck1as2 Trt vs. W.T Cdc15 TRT	0.001892	-0.007432 to 0.01122	No	ns	>0.9999	L-AS
	pom1as1shk1as2 0 min vs. pom1as1shk1as2 DMSO	0.0002152	-0.009244 to 0.009675	No	ns	>0.9999	M-N
	pom1as1shk1as2 0 min vs. pom1as1shk1as2 Trt	-0.04177	-0.05119 to -0.03235	Yes	****	<0.0001	M-O
	pom1as1shk1as2 0 min vs. pom1as1pck1as2 0 min	-0.0007639	-0.01445 to 0.01293	No	ns	>0.9999	M-P
	pom1as1shk1as2 0 min vs. pom1as1pck1as2 DMSO	0.003013	-0.006407 to 0.01243	No	ns	>0.9999	M-Q
	pom1as1shk1as2 0 min vs. pom1as1pck1as2 Trt	-0.01844	-0.02788 to -0.009004	Yes	****	<0.0001	M-R
	pom1as1shk1as2 0 min vs. pom1as1kin1as1 0 min	0.002844	-0.01085 to 0.01653	No	ns	>0.9999	M-S
	pom1as1shk1as2 0 min vs. pom1as1kin1as1 DMSO	0.001462	-0.008102 to 0.01103	No	ns	>0.9999	M-T
	pom1as1shk1as2 0 min vs. pom1as1kin1as1 Trt	-0.02231	-0.03189 to -0.01272	Yes	****	<0.0001	M-U
	pom1as1shk1as2 0 min vs. shk1as2kin1as1 0 min	7.594e-05	-0.01361 to 0.01377	No	ns	>0.9999	M-V
	pom1as1shk1as2 0 min vs. shk1as2kin1as1 DMSO	0.0004466	-0.009075 to 0.009968	No	ns	>0.9999	M-W
	pom1as1shk1as2 0 min vs. shk1as2kin1as1 Trt	-0.025	-0.03477 to -0.01522	Yes	****	<0.0001	M-X
	pom1as1shk1as2 0 min vs. kin1as1pck1as2 0 min	0.00361	-0.009942 to 0.01716	No	ns	>0.9999	M-Y
	pom1as1shk1as2 0 min vs. kin1as1pck1as2 DMSO	0.003445	-0.006076 to 0.01297	No	ns	>0.9999	M-Z
	pom1as1shk1as2 0 min vs. kin1as1pck1as2 Trt	-0.01222	-0.02180 to -0.002633	Yes	***	0.0005	M-AA
	pom1as1shk1as2 0 min vs. shk1as2pck1as2 0 min	0.001907	-0.01115 to 0.01496	No	ns	>0.9999	M-AB
	pom1as1shk1as2 0 min vs. shk1as2pck1as2 DMSO	0.001625	-0.007795 to 0.01105	No	ns	>0.9999	M-AC
	pom1as1shk1as2 0 min vs. shk1as2pck1as2 0 min	-0.01425	-0.02410 to -0.004397	Yes	****	<0.0001	M-AD
	pom1as1shk1as2 0 min vs. pomkinshk DMSO	-0.0004481	-0.009721 to 0.008825	No	ns	>0.9999	M-AF
	pom1as1shk1as2 0 min vs. pomkinshk Trt	-0.05753	-0.06673 to -0.04832	Yes	****	<0.0001	M-AG
	pom1as1shk1as2 0 min vs. pomshkpck DMSO	0.0003218	-0.008701 to 0.009344	No	ns	>0.9999	M-AI
	pom1as1shk1as2 0 min vs. pomshkpck TRT	-0.03623	-0.04527 to -0.02719	Yes	****	<0.0001	M-AJ
	pom1as1shk1as2 0 min vs. pom kin pck DMSO	0.00138	-0.008021 to 0.01078	No	ns	>0.9999	M-AL
	pom1as1shk1as2 0 min vs. pom kin pck TRT	-0.03231	-0.04166 to -0.02297	Yes	****	<0.0001	M-AM
	pom1as1shk1as2 0 min vs. shk kin pck DMSO	0.0004746	-0.008621 to 0.009570	No	ns	>0.9999	M-AO
	pom1as1shk1as2 0 min vs. shk kin pck TRT	-0.02578	-0.03528 to -0.01628	Yes	****	<0.0001	M-AP
	pom1as1shk1as2 0 min vs. W.T Cdc15 DMSO	0.002885	-0.006210 to 0.01198	No	ns	>0.9999	M-AR
	pom1as1shk1as2 0 min vs. W.T Cdc15 TRT	0.001654	-0.007691 to 0.01100	No	ns	>0.9999	M-AS
	pom1as1shk1as2 DMSO vs. pom1as1shk1as2 Trt	-0.04198	-0.05140 to -0.03256	Yes	****	<0.0001	N-O
	pom1as1shk1as2 DMSO vs. pom1as1pck1as2 0 min	-0.0009791	-0.01467 to 0.01271	No	ns	>0.9999	N-P
	pom1as1shk1as2 DMSO vs. pom1as1pck1as2 DMSO	0.002798	-0.006622 to 0.01222	No	ns	>0.9999	N-Q
	pom1as1shk1as2 DMSO vs. pom1as1pck1as2 Trt	-0.01866	-0.02810 to -0.009219	Yes	****	<0.0001	N-R
	pom1as1shk1as2 DMSO vs. pom1as1kin1as1 0 min	0.002629	-0.01106 to 0.01632	No	ns	>0.9999	N-S
	pom1as1shk1as2 DMSO vs. pom1as1kin1as1 DMSO	0.001247	-0.008317 to 0.01081	No	ns	>0.9999	N-T
	pom1as1shk1as2 DMSO vs. pom1as1kin1as1 Trt	-0.02252	-0.03211 to -0.01294	Yes	****	<0.0001	N-U
	pom1as1shk1as2 DMSO vs. shk1as2kin1as1 0 min	-0.0001392	-0.01383 to 0.01355	No	ns	>0.9999	N-V
	pom1as1shk1as2 DMSO vs. shk1as2kin1as1 DMSO	0.0002315	-0.009290 to 0.009753	No	ns	>0.9999	N-W
	pom1as1shk1as2 DMSO vs. shk1as2kin1as1 Trt	-0.02521	-0.03498 to -0.01544	Yes	****	<0.0001	N-X
	pom1as1shk1as2 DMSO vs. kin1as1pck1as2 0 min	0.003395	-0.01016 to 0.01695	No	ns	>0.9999	N-Y
	pom1as1shk1as2 DMSO vs. kin1as1pck1as2 DMSO	0.00323	-0.006291 to 0.01275	No	ns	>0.9999	N-Z
	pom1as1shk1as2 DMSO vs. kin1as1pck1as2 Trt	-0.01243	-0.02202 to -0.002848	Yes	***	0.0003	N-AA
	pom1as1shk1as2 DMSO vs. shk1as2pck1as2 0 min	0.001692	-0.01136 to 0.01475	No	ns	>0.9999	N-AB
	pom1as1shk1as2 DMSO vs. shk1as2pck1as2 DMSO	0.00141	-0.008010 to 0.01083	No	ns	>0.9999	N-AC
	pom1as1shk1as2 DMSO vs. shk1as2pck1as2 0 min	-0.01446	-0.02431 to -0.004612	Yes	****	<0.0001	N-AD
	pom1as1shk1as2 DMSO vs. pomkinshk DMSO	-0.0006632	-0.009936 to 0.008610	No	ns	>0.9999	N-AF
	pom1as1shk1as2 DMSO vs. pomkinshk Trt	-0.05774	-0.06695 to -0.04854	Yes	****	<0.0001	N-AG
	pom1as1shk1as2 DMSO vs. pomshkpck DMSO	0.0001067	-0.008916 to 0.009129	No	ns	>0.9999	N-AI
	pom1as1shk1as2 DMSO vs. pomshkpck TRT	-0.03645	-0.04548 to -0.02741	Yes	****	<0.0001	N-AJ
	pom1as1shk1as2 DMSO vs. pom kin pck DMSO	0.001165	-0.008236 to 0.01057	No	ns	>0.9999	N-AL
	pom1as1shk1as2 DMSO vs. pom kin pck TRT	-0.03253	-0.04187 to -0.02318	Yes	****	<0.0001	N-AM
	pom1as1shk1as2 DMSO vs. shk kin pck DMSO	0.0002594	-0.008836 to 0.009355	No	ns	>0.9999	N-AO
	pom1as1shk1as2 DMSO vs. shk kin pck TRT	-0.02599	-0.03549 to -0.01649	Yes	****	<0.0001	N-AP
	pom1as1shk1as2 DMSO vs. W.T Cdc15 DMSO	0.00267	-0.006426 to 0.01177	No	ns	>0.9999	N-AR
	pom1as1shk1as2 DMSO vs. W.T Cdc15 TRT	0.001438	-0.007906 to 0.01078	No	ns	>0.9999	N-AS
	pom1as1shk1as2 Trt vs. pom1as1pck1as2 0 min	0.041	0.02734 to 0.05467	Yes	****	<0.0001	O-P
	pom1as1shk1as2 Trt vs. pom1as1pck1as2 DMSO	0.04478	0.03540 to 0.05416	Yes	****	<0.0001	O-Q
	pom1as1shk1as2 Trt vs. pom1as1pck1as2 Trt	0.02332	0.01392 to 0.03272	Yes	****	<0.0001	O-R
	pom1as1shk1as2 Trt vs. pom1as1kin1as1 0 min	0.04461	0.03095 to 0.05827	Yes	****	<0.0001	O-S
	pom1as1shk1as2 Trt vs. pom1as1kin1as1 DMSO	0.04323	0.03370 to 0.05275	Yes	****	<0.0001	O-T
	pom1as1shk1as2 Trt vs. pom1as1kin1as1 Trt	0.01946	0.009913 to 0.02901	Yes	****	<0.0001	O-U
	pom1as1shk1as2 Trt vs. shk1as2kin1as1 0 min	0.04184	0.02818 to 0.05551	Yes	****	<0.0001	O-V
	pom1as1shk1as2 Trt vs. shk1as2kin1as1 DMSO	0.04221	0.03273 to 0.05170	Yes	****	<0.0001	O-W
	pom1as1shk1as2 Trt vs. shk1as2kin1as1 Trt	0.01677	0.007036 to 0.02651	Yes	****	<0.0001	O-X
	pom1as1shk1as2 Trt vs. kin1as1pck1as2 0 min	0.04538	0.03185 to 0.05890	Yes	****	<0.0001	O-Y
	pom1as1shk1as2 Trt vs. kin1as1pck1as2 DMSO	0.04521	0.03573 to 0.05469	Yes	****	<0.0001	O-Z
	pom1as1shk1as2 Trt vs. kin1as1pck1as2 Trt	0.02955	0.02000 to 0.03909	Yes	****	<0.0001	O-AA
	pom1as1shk1as2 Trt vs. shk1as2pck1as2 0 min	0.04367	0.03065 to 0.05670	Yes	****	<0.0001	O-AB
	pom1as1shk1as2 Trt vs. shk1as2pck1as2 DMSO	0.04339	0.03401 to 0.05277	Yes	****	<0.0001	O-AC
	pom1as1shk1as2 Trt vs. shk1as2pck1as2 0 min	0.02752	0.01771 to 0.03733	Yes	****	<0.0001	O-AD
	pom1as1shk1as2 Trt vs. pomkinshk DMSO	0.04132	0.03209 to 0.05055	Yes	****	<0.0001	O-AF
	pom1as1shk1as2 Trt vs. pomkinshk Trt	-0.01576	-0.02492 to -0.006594	Yes	****	<0.0001	O-AG
	pom1as1shk1as2 Trt vs. pomshkpck DMSO	0.04209	0.03311 to 0.05107	Yes	****	<0.0001	O-AI
	pom1as1shk1as2 Trt vs. pomshkpck TRT	0.005536	-0.003459 to 0.01453	No	ns	0.9325	O-AJ
	pom1as1shk1as2 Trt vs. pom kin pck DMSO	0.04315	0.03379 to 0.05251	Yes	****	<0.0001	O-AL
	pom1as1shk1as2 Trt vs. pom kin pck TRT	0.009456	0.0001514 to 0.01876	Yes	*	0.04	O-AM
	pom1as1shk1as2 Trt vs. shk kin pck DMSO	0.04224	0.03319 to 0.05130	Yes	****	<0.0001	O-AO
	pom1as1shk1as2 Trt vs. shk kin pck TRT	0.01599	0.006528 to 0.02545	Yes	****	<0.0001	O-AP
	pom1as1shk1as2 Trt vs. W.T Cdc15 DMSO	0.04465	0.03560 to 0.05371	Yes	****	<0.0001	O-AR
	pom1as1shk1as2 Trt vs. W.T Cdc15 TRT	0.04342	0.03412 to 0.05272	Yes	****	<0.0001	O-AS
	pom1as1pck1as2 0 min vs. pom1as1pck1as2 DMSO	0.003777	-0.009886 to 0.01744	No	ns	>0.9999	P-Q
	pom1as1pck1as2 0 min vs. pom1as1pck1as2 Trt	-0.01768	-0.03136 to -0.004002	Yes	***	0.0004	P-R
	pom1as1pck1as2 0 min vs. pom1as1kin1as1 0 min	0.003608	-0.01329 to 0.02050	No	ns	>0.9999	P-S
	pom1as1pck1as2 0 min vs. pom1as1kin1as1 DMSO	0.002226	-0.01154 to 0.01599	No	ns	>0.9999	P-T
	pom1as1pck1as2 0 min vs. pom1as1kin1as1 Trt	-0.02154	-0.03532 to -0.007765	Yes	****	<0.0001	P-U
	pom1as1pck1as2 0 min vs. shk1as2kin1as1 0 min	0.0008399	-0.01605 to 0.01773	No	ns	>0.9999	P-V
	pom1as1pck1as2 0 min vs. shk1as2kin1as1 DMSO	0.001211	-0.01252 to 0.01494	No	ns	>0.9999	P-W
	pom1as1pck1as2 0 min vs. shk1as2kin1as1 Trt	-0.02423	-0.03814 to -0.01032	Yes	****	<0.0001	P-X
	pom1as1pck1as2 0 min vs. kin1as1pck1as2 0 min	0.004374	-0.01241 to 0.02116	No	ns	>0.9999	P-Y
	pom1as1pck1as2 0 min vs. kin1as1pck1as2 DMSO	0.004209	-0.009524 to 0.01794	No	ns	>0.9999	P-Z
	pom1as1pck1as2 0 min vs. kin1as1pck1as2 Trt	-0.01145	-0.02523 to 0.002323	No	ns	0.3301	P-AA
	pom1as1pck1as2 0 min vs. shk1as2pck1as2 0 min	0.002671	-0.01371 to 0.01905	No	ns	>0.9999	P-AB
	pom1as1pck1as2 0 min vs. shk1as2pck1as2 DMSO	0.002389	-0.01127 to 0.01605	No	ns	>0.9999	P-AC
	pom1as1pck1as2 0 min vs. shk1as2pck1as2 0 min	-0.01348	-0.02745 to 0.0004807	No	ns	0.0786	P-AD
	pom1as1pck1as2 0 min vs. pomkinshk DMSO	0.0003159	-0.01325 to 0.01388	No	ns	>0.9999	P-AF
	pom1as1pck1as2 0 min vs. pomkinshk Trt	-0.05676	-0.07028 to -0.04325	Yes	****	<0.0001	P-AG
	pom1as1pck1as2 0 min vs. pomshkpck DMSO	0.001086	-0.01231 to 0.01448	No	ns	>0.9999	P-AI
	pom1as1pck1as2 0 min vs. pomshkpck TRT	-0.03547	-0.04887 to -0.02206	Yes	****	<0.0001	P-AJ
	pom1as1pck1as2 0 min vs. pom kin pck DMSO	0.002144	-0.01151 to 0.01579	No	ns	>0.9999	P-AL
	pom1as1pck1as2 0 min vs. pom kin pck TRT	-0.03155	-0.04516 to -0.01794	Yes	****	<0.0001	P-AM
	pom1as1pck1as2 0 min vs. shk kin pck DMSO	0.001239	-0.01220 to 0.01468	No	ns	>0.9999	P-AO
	pom1as1pck1as2 0 min vs. shk kin pck TRT	-0.02501	-0.03873 to -0.01129	Yes	****	<0.0001	P-AP
	pom1as1pck1as2 0 min vs. W.T Cdc15 DMSO	0.003649	-0.009793 to 0.01709	No	ns	>0.9999	P-AR
	pom1as1pck1as2 0 min vs. W.T Cdc15 TRT	0.002418	-0.01119 to 0.01603	No	ns	>0.9999	P-AS
	pom1as1pck1as2 DMSO vs. pom1as1pck1as2 Trt	-0.02146	-0.03086 to -0.01206	Yes	****	<0.0001	Q-R
	pom1as1pck1as2 DMSO vs. pom1as1kin1as1 0 min	-0.0001689	-0.01383 to 0.01349	No	ns	>0.9999	Q-S
	pom1as1pck1as2 DMSO vs. pom1as1kin1as1 DMSO	-0.001551	-0.01108 to 0.007974	No	ns	>0.9999	Q-T
	pom1as1pck1as2 DMSO vs. pom1as1kin1as1 Trt	-0.02532	-0.03487 to -0.01577	Yes	****	<0.0001	Q-U
	pom1as1pck1as2 DMSO vs. shk1as2kin1as1 0 min	-0.002937	-0.01660 to 0.01073	No	ns	>0.9999	Q-V
	pom1as1pck1as2 DMSO vs. shk1as2kin1as1 DMSO	-0.002566	-0.01205 to 0.006915	No	ns	>0.9999	Q-W
	pom1as1pck1as2 DMSO vs. shk1as2kin1as1 Trt	-0.02801	-0.03774 to -0.01827	Yes	****	<0.0001	Q-X
	pom1as1pck1as2 DMSO vs. kin1as1pck1as2 0 min	0.0005974	-0.01293 to 0.01412	No	ns	>0.9999	Q-Y
	pom1as1pck1as2 DMSO vs. kin1as1pck1as2 DMSO	0.0004324	-0.009049 to 0.009914	No	ns	>0.9999	Q-Z
	pom1as1pck1as2 DMSO vs. kin1as1pck1as2 Trt	-0.01523	-0.02478 to -0.005685	Yes	****	<0.0001	Q-AA
	pom1as1pck1as2 DMSO vs. shk1as2pck1as2 0 min	-0.001106	-0.01413 to 0.01192	No	ns	>0.9999	Q-AB
	pom1as1pck1as2 DMSO vs. shk1as2pck1as2 DMSO	-0.001388	-0.01077 to 0.007993	No	ns	>0.9999	Q-AC
	pom1as1pck1as2 DMSO vs. shk1as2pck1as2 0 min	-0.01726	-0.02707 to -0.007448	Yes	****	<0.0001	Q-AD
	pom1as1pck1as2 DMSO vs. pomkinshk DMSO	-0.003461	-0.01269 to 0.005772	No	ns	>0.9999	Q-AF
	pom1as1pck1as2 DMSO vs. pomkinshk Trt	-0.06054	-0.06970 to -0.05137	Yes	****	<0.0001	Q-AG
	pom1as1pck1as2 DMSO vs. pomshkpck DMSO	-0.002691	-0.01167 to 0.006290	No	ns	>0.9999	Q-AI
	pom1as1pck1as2 DMSO vs. pomshkpck TRT	-0.03924	-0.04824 to -0.03025	Yes	****	<0.0001	Q-AJ
	pom1as1pck1as2 DMSO vs. pom kin pck DMSO	-0.001633	-0.01099 to 0.007728	No	ns	>0.9999	Q-AL
	pom1as1pck1as2 DMSO vs. pom kin pck TRT	-0.03532	-0.04463 to -0.02602	Yes	****	<0.0001	Q-AM
	pom1as1pck1as2 DMSO vs. shk kin pck DMSO	-0.002538	-0.01159 to 0.006516	No	ns	>0.9999	Q-AO
	pom1as1pck1as2 DMSO vs. shk kin pck TRT	-0.02879	-0.03825 to -0.01933	Yes	****	<0.0001	Q-AP
	pom1as1pck1as2 DMSO vs. W.T Cdc15 DMSO	-0.0001282	-0.009182 to 0.008926	No	ns	>0.9999	Q-AR
	pom1as1pck1as2 DMSO vs. W.T Cdc15 TRT	-0.001359	-0.01066 to 0.007945	No	ns	>0.9999	Q-AS
	pom1as1pck1as2 Trt vs. pom1as1kin1as1 0 min	0.02129	0.007611 to 0.03496	Yes	****	<0.0001	R-S
	pom1as1pck1as2 Trt vs. pom1as1kin1as1 DMSO	0.01991	0.01036 to 0.02945	Yes	****	<0.0001	R-T
	pom1as1pck1as2 Trt vs. pom1as1kin1as1 Trt	-0.003864	-0.01343 to 0.005702	No	ns	>0.9999	R-U
	pom1as1pck1as2 Trt vs. shk1as2kin1as1 0 min	0.01852	0.004842 to 0.03220	Yes	***	0.0001	R-V
	pom1as1pck1as2 Trt vs. shk1as2kin1as1 DMSO	0.01889	0.009389 to 0.02839	Yes	****	<0.0001	R-W
	pom1as1pck1as2 Trt vs. shk1as2kin1as1 Trt	-0.006553	-0.01631 to 0.003201	No	ns	0.8253	R-X
	pom1as1pck1as2 Trt vs. kin1as1pck1as2 0 min	0.02205	0.008515 to 0.03559	Yes	****	<0.0001	R-Y
	pom1as1pck1as2 Trt vs. kin1as1pck1as2 DMSO	0.02189	0.01239 to 0.03139	Yes	****	<0.0001	R-Z
	pom1as1pck1as2 Trt vs. kin1as1pck1as2 Trt	0.006225	-0.003341 to 0.01579	No	ns	0.8728	R-AA
	pom1as1pck1as2 Trt vs. shk1as2pck1as2 0 min	0.02035	0.007309 to 0.03339	Yes	****	<0.0001	R-AB
	pom1as1pck1as2 Trt vs. shk1as2pck1as2 DMSO	0.02007	0.01067 to 0.02947	Yes	****	<0.0001	R-AC
	pom1as1pck1as2 Trt vs. shk1as2pck1as2 0 min	0.004197	-0.005633 to 0.01403	No	ns	>0.9999	R-AD
	pom1as1pck1as2 Trt vs. pomkinshk DMSO	0.018	0.008743 to 0.02725	Yes	****	<0.0001	R-AF
	pom1as1pck1as2 Trt vs. pomkinshk Trt	-0.03908	-0.04827 to -0.02990	Yes	****	<0.0001	R-AG
	pom1as1pck1as2 Trt vs. pomshkpck DMSO	0.01877	0.009763 to 0.02777	Yes	****	<0.0001	R-AI
	pom1as1pck1as2 Trt vs. pomshkpck TRT	-0.01779	-0.02680 to -0.008771	Yes	****	<0.0001	R-AJ
	pom1as1pck1as2 Trt vs. pom kin pck DMSO	0.01982	0.01044 to 0.02920	Yes	****	<0.0001	R-AL
	pom1as1pck1as2 Trt vs. pom kin pck TRT	-0.01387	-0.02319 to -0.004543	Yes	****	<0.0001	R-AM
	pom1as1pck1as2 Trt vs. shk kin pck DMSO	0.01892	0.009843 to 0.02799	Yes	****	<0.0001	R-AO
	pom1as1pck1as2 Trt vs. shk kin pck TRT	-0.007334	-0.01681 to 0.002147	No	ns	0.5108	R-AP
	pom1as1pck1as2 Trt vs. W.T Cdc15 DMSO	0.02133	0.01225 to 0.03040	Yes	****	<0.0001	R-AR
	pom1as1pck1as2 Trt vs. W.T Cdc15 TRT	0.0201	0.01077 to 0.02942	Yes	****	<0.0001	R-AS
	pom1as1kin1as1 0 min vs. pom1as1kin1as1 DMSO	-0.001382	-0.01514 to 0.01238	No	ns	>0.9999	S-T
	pom1as1kin1as1 0 min vs. pom1as1kin1as1 Trt	-0.02515	-0.03893 to -0.01137	Yes	****	<0.0001	S-U
	pom1as1kin1as1 0 min vs. shk1as2kin1as1 0 min	-0.002768	-0.01966 to 0.01413	No	ns	>0.9999	S-V
	pom1as1kin1as1 0 min vs. shk1as2kin1as1 DMSO	-0.002397	-0.01613 to 0.01134	No	ns	>0.9999	S-W
	pom1as1kin1as1 0 min vs. shk1as2kin1as1 Trt	-0.02784	-0.04175 to -0.01393	Yes	****	<0.0001	S-X
	pom1as1kin1as1 0 min vs. kin1as1pck1as2 0 min	0.0007664	-0.01602 to 0.01755	No	ns	>0.9999	S-Y
	pom1as1kin1as1 0 min vs. kin1as1pck1as2 DMSO	0.0006014	-0.01313 to 0.01433	No	ns	>0.9999	S-Z
	pom1as1kin1as1 0 min vs. kin1as1pck1as2 Trt	-0.01506	-0.02884 to -0.001285	Yes	*	0.0127	S-AA
	pom1as1kin1as1 0 min vs. shk1as2pck1as2 0 min	-0.0009369	-0.01732 to 0.01545	No	ns	>0.9999	S-AB
	pom1as1kin1as1 0 min vs. shk1as2pck1as2 DMSO	-0.001219	-0.01488 to 0.01244	No	ns	>0.9999	S-AC
	pom1as1kin1as1 0 min vs. shk1as2pck1as2 0 min	-0.01709	-0.03105 to -0.003127	Yes	**	0.0014	S-AD
	pom1as1kin1as1 0 min vs. pomkinshk DMSO	-0.003292	-0.01685 to 0.01027	No	ns	>0.9999	S-AF
	pom1as1kin1as1 0 min vs. pomkinshk Trt	-0.06037	-0.07389 to -0.04685	Yes	****	<0.0001	S-AG
	pom1as1kin1as1 0 min vs. pomshkpck DMSO	-0.002522	-0.01591 to 0.01087	No	ns	>0.9999	S-AI
	pom1as1kin1as1 0 min vs. pomshkpck TRT	-0.03907	-0.05248 to -0.02567	Yes	****	<0.0001	S-AJ
	pom1as1kin1as1 0 min vs. pom kin pck DMSO	-0.001464	-0.01511 to 0.01219	No	ns	>0.9999	S-AL
	pom1as1kin1as1 0 min vs. pom kin pck TRT	-0.03515	-0.04877 to -0.02154	Yes	****	<0.0001	S-AM
	pom1as1kin1as1 0 min vs. shk kin pck DMSO	-0.00237	-0.01581 to 0.01107	No	ns	>0.9999	S-AO
	pom1as1kin1as1 0 min vs. shk kin pck TRT	-0.02862	-0.04234 to -0.01490	Yes	****	<0.0001	S-AP
	pom1as1kin1as1 0 min vs. W.T Cdc15 DMSO	4.078e-05	-0.01340 to 0.01348	No	ns	>0.9999	S-AR
	pom1as1kin1as1 0 min vs. W.T Cdc15 TRT	-0.001191	-0.01480 to 0.01242	No	ns	>0.9999	S-AS
	pom1as1kin1as1 DMSO vs. pom1as1kin1as1 Trt	-0.02377	-0.03346 to -0.01408	Yes	****	<0.0001	T-U
	pom1as1kin1as1 DMSO vs. shk1as2kin1as1 0 min	-0.001386	-0.01515 to 0.01238	No	ns	>0.9999	T-V
	pom1as1kin1as1 DMSO vs. shk1as2kin1as1 DMSO	-0.001015	-0.01064 to 0.008609	No	ns	>0.9999	T-W
	pom1as1kin1as1 DMSO vs. shk1as2kin1as1 Trt	-0.02646	-0.03633 to -0.01658	Yes	****	<0.0001	T-X
	pom1as1kin1as1 DMSO vs. kin1as1pck1as2 0 min	0.002148	-0.01148 to 0.01577	No	ns	>0.9999	T-Y
	pom1as1kin1as1 DMSO vs. kin1as1pck1as2 DMSO	0.001983	-0.007641 to 0.01161	No	ns	>0.9999	T-Z
	pom1as1kin1as1 DMSO vs. kin1as1pck1as2 Trt	-0.01368	-0.02337 to -0.003992	Yes	****	<0.0001	T-AA
	pom1as1kin1as1 DMSO vs. shk1as2pck1as2 0 min	0.0004451	-0.01269 to 0.01358	No	ns	>0.9999	T-AB
	pom1as1kin1as1 DMSO vs. shk1as2pck1as2 DMSO	0.000163	-0.009362 to 0.009688	No	ns	>0.9999	T-AC
	pom1as1kin1as1 DMSO vs. shk1as2pck1as2 0 min	-0.01571	-0.02566 to -0.005759	Yes	****	<0.0001	T-AD
	pom1as1kin1as1 DMSO vs. pomkinshk DMSO	-0.00191	-0.01129 to 0.007469	No	ns	>0.9999	T-AF
	pom1as1kin1as1 DMSO vs. pomkinshk Trt	-0.05899	-0.06830 to -0.04968	Yes	****	<0.0001	T-AG
	pom1as1kin1as1 DMSO vs. pomshkpck DMSO	-0.00114	-0.01027 to 0.007991	No	ns	>0.9999	T-AI
	pom1as1kin1as1 DMSO vs. pomshkpck TRT	-0.03769	-0.04684 to -0.02855	Yes	****	<0.0001	T-AJ
	pom1as1kin1as1 DMSO vs. pom kin pck DMSO	-8.223e-05	-0.009588 to 0.009423	No	ns	>0.9999	T-AL
	pom1as1kin1as1 DMSO vs. pom kin pck TRT	-0.03377	-0.04322 to -0.02432	Yes	****	<0.0001	T-AM
	pom1as1kin1as1 DMSO vs. shk kin pck DMSO	-0.0009875	-0.01019 to 0.008216	No	ns	>0.9999	T-AO
	pom1as1kin1as1 DMSO vs. shk kin pck TRT	-0.02724	-0.03684 to -0.01764	Yes	****	<0.0001	T-AP
	pom1as1kin1as1 DMSO vs. W.T Cdc15 DMSO	0.001423	-0.007781 to 0.01063	No	ns	>0.9999	T-AR
	pom1as1kin1as1 DMSO vs. W.T Cdc15 TRT	0.0001915	-0.009258 to 0.009641	No	ns	>0.9999	T-AS
	pom1as1kin1as1 Trt vs. shk1as2kin1as1 0 min	0.02238	0.008605 to 0.03616	Yes	****	<0.0001	U-V
	pom1as1kin1as1 Trt vs. shk1as2kin1as1 DMSO	0.02275	0.01311 to 0.03240	Yes	****	<0.0001	U-W
	pom1as1kin1as1 Trt vs. shk1as2kin1as1 Trt	-0.002689	-0.01258 to 0.007206	No	ns	>0.9999	U-X
	pom1as1kin1as1 Trt vs. kin1as1pck1as2 0 min	0.02592	0.01228 to 0.03956	Yes	****	<0.0001	U-Y
	pom1as1kin1as1 Trt vs. kin1as1pck1as2 DMSO	0.02575	0.01611 to 0.03540	Yes	****	<0.0001	U-Z
	pom1as1kin1as1 Trt vs. kin1as1pck1as2 Trt	0.01009	0.0003790 to 0.01980	Yes	*	0.0289	U-AA
	pom1as1kin1as1 Trt vs. shk1as2pck1as2 0 min	0.02421	0.01107 to 0.03736	Yes	****	<0.0001	U-AB
	pom1as1kin1as1 Trt vs. shk1as2pck1as2 DMSO	0.02393	0.01439 to 0.03348	Yes	****	<0.0001	U-AC
	pom1as1kin1as1 Trt vs. shk1as2pck1as2 0 min	0.008061	-0.001910 to 0.01803	No	ns	0.398	U-AD
	pom1as1kin1as1 Trt vs. pomkinshk DMSO	0.02186	0.01246 to 0.03126	Yes	****	<0.0001	U-AF
	pom1as1kin1as1 Trt vs. pomkinshk Trt	-0.03522	-0.04455 to -0.02588	Yes	****	<0.0001	U-AG
	pom1as1kin1as1 Trt vs. pomshkpck DMSO	0.02263	0.01347 to 0.03178	Yes	****	<0.0001	U-AI
	pom1as1kin1as1 Trt vs. pomshkpck TRT	-0.01392	-0.02309 to -0.004755	Yes	****	<0.0001	U-AJ
	pom1as1kin1as1 Trt vs. pom kin pck DMSO	0.02369	0.01416 to 0.03321	Yes	****	<0.0001	U-AL
	pom1as1kin1as1 Trt vs. pom kin pck TRT	-0.01	-0.01948 to -0.0005318	Yes	*	0.0225	U-AM
	pom1as1kin1as1 Trt vs. shk kin pck DMSO	0.02278	0.01356 to 0.03201	Yes	****	<0.0001	U-AO
	pom1as1kin1as1 Trt vs. shk kin pck TRT	-0.00347	-0.01310 to 0.006156	No	ns	>0.9999	U-AP
	pom1as1kin1as1 Trt vs. W.T Cdc15 DMSO	0.02519	0.01597 to 0.03442	Yes	****	<0.0001	U-AR
	pom1as1kin1as1 Trt vs. W.T Cdc15 TRT	0.02396	0.01449 to 0.03343	Yes	****	<0.0001	U-AS
	shk1as2kin1as1 0 min vs. shk1as2kin1as1 DMSO	0.0003707	-0.01336 to 0.01410	No	ns	>0.9999	V-W
	shk1as2kin1as1 0 min vs. shk1as2kin1as1 Trt	-0.02507	-0.03898 to -0.01116	Yes	****	<0.0001	V-X
	shk1as2kin1as1 0 min vs. kin1as1pck1as2 0 min	0.003535	-0.01325 to 0.02032	No	ns	>0.9999	V-Y
	shk1as2kin1as1 0 min vs. kin1as1pck1as2 DMSO	0.00337	-0.01036 to 0.01710	No	ns	>0.9999	V-Z
	shk1as2kin1as1 0 min vs. kin1as1pck1as2 Trt	-0.01229	-0.02607 to 0.001484	No	ns	0.1841	V-AA
	shk1as2kin1as1 0 min vs. shk1as2pck1as2 0 min	0.001831	-0.01455 to 0.01821	No	ns	>0.9999	V-AB
	shk1as2kin1as1 0 min vs. shk1as2pck1as2 DMSO	0.001549	-0.01211 to 0.01521	No	ns	>0.9999	V-AC
	shk1as2kin1as1 0 min vs. shk1as2pck1as2 0 min	-0.01432	-0.02829 to -0.0003591	Yes	*	0.035	V-AD
	shk1as2kin1as1 0 min vs. pomkinshk DMSO	-0.000524	-0.01409 to 0.01304	No	ns	>0.9999	V-AF
	shk1as2kin1as1 0 min vs. pomkinshk Trt	-0.0576	-0.07112 to -0.04409	Yes	****	<0.0001	V-AG
	shk1as2kin1as1 0 min vs. pomshkpck DMSO	0.0002459	-0.01315 to 0.01364	No	ns	>0.9999	V-AI
	shk1as2kin1as1 0 min vs. pomshkpck TRT	-0.03631	-0.04971 to -0.02290	Yes	****	<0.0001	V-AJ
	shk1as2kin1as1 0 min vs. pom kin pck DMSO	0.001304	-0.01235 to 0.01495	No	ns	>0.9999	V-AL
	shk1as2kin1as1 0 min vs. pom kin pck TRT	-0.03239	-0.04600 to -0.01878	Yes	****	<0.0001	V-AM
	shk1as2kin1as1 0 min vs. shk kin pck DMSO	0.0003987	-0.01304 to 0.01384	No	ns	>0.9999	V-AO
	shk1as2kin1as1 0 min vs. shk kin pck TRT	-0.02585	-0.03957 to -0.01213	Yes	****	<0.0001	V-AP
	shk1as2kin1as1 0 min vs. W.T Cdc15 DMSO	0.002809	-0.01063 to 0.01625	No	ns	>0.9999	V-AR
	shk1as2kin1as1 0 min vs. W.T Cdc15 TRT	0.001578	-0.01203 to 0.01519	No	ns	>0.9999	V-AS
	shk1as2kin1as1 DMSO vs. shk1as2kin1as1 Trt	-0.02544	-0.03527 to -0.01561	Yes	****	<0.0001	W-X
	shk1as2kin1as1 DMSO vs. kin1as1pck1as2 0 min	0.003164	-0.01043 to 0.01676	No	ns	>0.9999	W-Y
	shk1as2kin1as1 DMSO vs. kin1as1pck1as2 DMSO	0.002999	-0.006583 to 0.01258	No	ns	>0.9999	W-Z
	shk1as2kin1as1 DMSO vs. kin1as1pck1as2 Trt	-0.01267	-0.02231 to -0.003019	Yes	***	0.0002	W-AA
	shk1as2kin1as1 DMSO vs. shk1as2pck1as2 0 min	0.001461	-0.01164 to 0.01456	No	ns	>0.9999	W-AB
	shk1as2kin1as1 DMSO vs. shk1as2pck1as2 DMSO	0.001178	-0.008303 to 0.01066	No	ns	>0.9999	W-AC
	shk1as2kin1as1 DMSO vs. shk1as2pck1as2 0 min	-0.01469	-0.02460 to -0.004784	Yes	****	<0.0001	W-AD
	shk1as2kin1as1 DMSO vs. pomkinshk DMSO	-0.0008947	-0.01023 to 0.008441	No	ns	>0.9999	W-AF
	shk1as2kin1as1 DMSO vs. pomkinshk Trt	-0.05797	-0.06724 to -0.04870	Yes	****	<0.0001	W-AG
	shk1as2kin1as1 DMSO vs. pomshkpck DMSO	-0.0001248	-0.009212 to 0.008962	No	ns	>0.9999	W-AI
	shk1as2kin1as1 DMSO vs. pomshkpck TRT	-0.03668	-0.04578 to -0.02758	Yes	****	<0.0001	W-AJ
	shk1as2kin1as1 DMSO vs. pom kin pck DMSO	0.0009332	-0.008529 to 0.01040	No	ns	>0.9999	W-AL
	shk1as2kin1as1 DMSO vs. pom kin pck TRT	-0.03276	-0.04216 to -0.02335	Yes	****	<0.0001	W-AM
	shk1as2kin1as1 DMSO vs. shk kin pck DMSO	2.797e-05	-0.009131 to 0.009187	No	ns	>0.9999	W-AO
	shk1as2kin1as1 DMSO vs. shk kin pck TRT	-0.02622	-0.03579 to -0.01666	Yes	****	<0.0001	W-AP
	shk1as2kin1as1 DMSO vs. W.T Cdc15 DMSO	0.002438	-0.006721 to 0.01160	No	ns	>0.9999	W-AR
	shk1as2kin1as1 DMSO vs. W.T Cdc15 TRT	0.001207	-0.008200 to 0.01061	No	ns	>0.9999	W-AS
	shk1as2kin1as1 Trt vs. kin1as1pck1as2 0 min	0.02861	0.01483 to 0.04238	Yes	****	<0.0001	X-Y
	shk1as2kin1as1 Trt vs. kin1as1pck1as2 DMSO	0.02844	0.01861 to 0.03827	Yes	****	<0.0001	X-Z
	shk1as2kin1as1 Trt vs. kin1as1pck1as2 Trt	0.01278	0.002883 to 0.02267	Yes	***	0.0004	X-AA
	shk1as2kin1as1 Trt vs. shk1as2pck1as2 0 min	0.0269	0.01362 to 0.04019	Yes	****	<0.0001	X-AB
	shk1as2kin1as1 Trt vs. shk1as2pck1as2 DMSO	0.02662	0.01689 to 0.03636	Yes	****	<0.0001	X-AC
	shk1as2kin1as1 Trt vs. shk1as2pck1as2 0 min	0.01075	0.0005990 to 0.02090	Yes	*	0.0215	X-AD
	shk1as2kin1as1 Trt vs. pomkinshk DMSO	0.02455	0.01496 to 0.03414	Yes	****	<0.0001	X-AF
	shk1as2kin1as1 Trt vs. pomkinshk Trt	-0.03253	-0.04206 to -0.02300	Yes	****	<0.0001	X-AG
	shk1as2kin1as1 Trt vs. pomshkpck DMSO	0.02532	0.01597 to 0.03467	Yes	****	<0.0001	X-AI
	shk1as2kin1as1 Trt vs. pomshkpck TRT	-0.01123	-0.02060 to -0.001871	Yes	**	0.0021	X-AJ
	shk1as2kin1as1 Trt vs. pom kin pck DMSO	0.02638	0.01666 to 0.03609	Yes	****	<0.0001	X-AL
	shk1as2kin1as1 Trt vs. pom kin pck TRT	-0.007315	-0.01698 to 0.002347	No	ns	0.566	X-AM
	shk1as2kin1as1 Trt vs. shk kin pck DMSO	0.02547	0.01605 to 0.03489	Yes	****	<0.0001	X-AO
	shk1as2kin1as1 Trt vs. shk kin pck TRT	-0.0007813	-0.01059 to 0.009031	No	ns	>0.9999	X-AP
	shk1as2kin1as1 Trt vs. W.T Cdc15 DMSO	0.02788	0.01846 to 0.03730	Yes	****	<0.0001	X-AR
	shk1as2kin1as1 Trt vs. W.T Cdc15 TRT	0.02665	0.01699 to 0.03631	Yes	****	<0.0001	X-AS
	kin1as1pck1as2 0 min vs. kin1as1pck1as2 DMSO	-0.000165	-0.01376 to 0.01343	No	ns	>0.9999	Y-Z
	kin1as1pck1as2 0 min vs. kin1as1pck1as2 Trt	-0.01583	-0.02947 to -0.002188	Yes	**	0.0042	Y-AA
	kin1as1pck1as2 0 min vs. shk1as2pck1as2 0 min	-0.001703	-0.01797 to 0.01456	No	ns	>0.9999	Y-AB
	kin1as1pck1as2 0 min vs. shk1as2pck1as2 DMSO	-0.001985	-0.01551 to 0.01154	No	ns	>0.9999	Y-AC
	kin1as1pck1as2 0 min vs. shk1as2pck1as2 0 min	-0.01786	-0.03168 to -0.004029	Yes	***	0.0004	Y-AD
	kin1as1pck1as2 0 min vs. pomkinshk DMSO	-0.004059	-0.01748 to 0.009365	No	ns	>0.9999	Y-AF
	kin1as1pck1as2 0 min vs. pomkinshk Trt	-0.06114	-0.07451 to -0.04776	Yes	****	<0.0001	Y-AG
	kin1as1pck1as2 0 min vs. pomshkpck DMSO	-0.003289	-0.01654 to 0.009963	No	ns	>0.9999	Y-AI
	kin1as1pck1as2 0 min vs. pomshkpck TRT	-0.03984	-0.05310 to -0.02658	Yes	****	<0.0001	Y-AJ
	kin1as1pck1as2 0 min vs. pom kin pck DMSO	-0.002231	-0.01574 to 0.01128	No	ns	>0.9999	Y-AL
	kin1as1pck1as2 0 min vs. pom kin pck TRT	-0.03592	-0.04939 to -0.02245	Yes	****	<0.0001	Y-AM
	kin1as1pck1as2 0 min vs. shk kin pck DMSO	-0.003136	-0.01644 to 0.01017	No	ns	>0.9999	Y-AO
	kin1as1pck1as2 0 min vs. shk kin pck TRT	-0.02939	-0.04297 to -0.01581	Yes	****	<0.0001	Y-AP
	kin1as1pck1as2 0 min vs. W.T Cdc15 DMSO	-0.0007256	-0.01403 to 0.01258	No	ns	>0.9999	Y-AR
	kin1as1pck1as2 0 min vs. W.T Cdc15 TRT	-0.001957	-0.01543 to 0.01152	No	ns	>0.9999	Y-AS
	kin1as1pck1as2 DMSO vs. kin1as1pck1as2 Trt	-0.01566	-0.02531 to -0.006018	Yes	****	<0.0001	Z-AA
	kin1as1pck1as2 DMSO vs. shk1as2pck1as2 0 min	-0.001538	-0.01464 to 0.01156	No	ns	>0.9999	Z-AB
	kin1as1pck1as2 DMSO vs. shk1as2pck1as2 DMSO	-0.00182	-0.01130 to 0.007662	No	ns	>0.9999	Z-AC
	kin1as1pck1as2 DMSO vs. shk1as2pck1as2 0 min	-0.01769	-0.02760 to -0.007783	Yes	****	<0.0001	Z-AD
	kin1as1pck1as2 DMSO vs. pomkinshk DMSO	-0.003894	-0.01323 to 0.005442	No	ns	>0.9999	Z-AF
	kin1as1pck1as2 DMSO vs. pomkinshk Trt	-0.06097	-0.07024 to -0.05170	Yes	****	<0.0001	Z-AG
	kin1as1pck1as2 DMSO vs. pomshkpck DMSO	-0.003124	-0.01221 to 0.005963	No	ns	>0.9999	Z-AI
	kin1as1pck1as2 DMSO vs. pomshkpck TRT	-0.03968	-0.04878 to -0.03058	Yes	****	<0.0001	Z-AJ
	kin1as1pck1as2 DMSO vs. pom kin pck DMSO	-0.002066	-0.01153 to 0.007397	No	ns	>0.9999	Z-AL
	kin1as1pck1as2 DMSO vs. pom kin pck TRT	-0.03576	-0.04516 to -0.02635	Yes	****	<0.0001	Z-AM
	kin1as1pck1as2 DMSO vs. shk kin pck DMSO	-0.002971	-0.01213 to 0.006188	No	ns	>0.9999	Z-AO
	kin1as1pck1as2 DMSO vs. shk kin pck TRT	-0.02922	-0.03878 to -0.01966	Yes	****	<0.0001	Z-AP
	kin1as1pck1as2 DMSO vs. W.T Cdc15 DMSO	-0.0005606	-0.009720 to 0.008599	No	ns	>0.9999	Z-AR
	kin1as1pck1as2 DMSO vs. W.T Cdc15 TRT	-0.001792	-0.01120 to 0.007615	No	ns	>0.9999	Z-AS
	kin1as1pck1as2 Trt vs. shk1as2pck1as2 0 min	0.01413	0.0009787 to 0.02727	Yes	*	0.017	AA-AB
	kin1as1pck1as2 Trt vs. shk1as2pck1as2 DMSO	0.01384	0.004297 to 0.02339	Yes	****	<0.0001	AA-AC
	kin1as1pck1as2 Trt vs. shk1as2pck1as2 0 min	-0.002028	-0.01200 to 0.007943	No	ns	>0.9999	AA-AD
	kin1as1pck1as2 Trt vs. pomkinshk DMSO	0.01177	0.002369 to 0.02117	Yes	***	0.0008	AA-AF
	kin1as1pck1as2 Trt vs. pomkinshk Trt	-0.04531	-0.05464 to -0.03597	Yes	****	<0.0001	AA-AG
	kin1as1pck1as2 Trt vs. pomshkpck DMSO	0.01254	0.003386 to 0.02169	Yes	****	<0.0001	AA-AI
	kin1as1pck1as2 Trt vs. pomshkpck TRT	-0.02401	-0.03318 to -0.01484	Yes	****	<0.0001	AA-AJ
	kin1as1pck1as2 Trt vs. pom kin pck DMSO	0.0136	0.004071 to 0.02313	Yes	****	<0.0001	AA-AL
	kin1as1pck1as2 Trt vs. pom kin pck TRT	-0.02009	-0.02956 to -0.01062	Yes	****	<0.0001	AA-AM
	kin1as1pck1as2 Trt vs. shk kin pck DMSO	0.01269	0.003467 to 0.02192	Yes	****	<0.0001	AA-AO
	kin1as1pck1as2 Trt vs. shk kin pck TRT	-0.01356	-0.02318 to -0.003933	Yes	****	<0.0001	AA-AP
	kin1as1pck1as2 Trt vs. W.T Cdc15 DMSO	0.0151	0.005877 to 0.02433	Yes	****	<0.0001	AA-AR
	kin1as1pck1as2 Trt vs. W.T Cdc15 TRT	0.01387	0.004400 to 0.02334	Yes	****	<0.0001	AA-AS
	shk1as2pck1as2 0 min vs. shk1as2pck1as2 DMSO	-0.0002821	-0.01331 to 0.01274	No	ns	>0.9999	AB-AC
	shk1as2pck1as2 0 min vs. shk1as2pck1as2 0 min	-0.01615	-0.02949 to -0.002813	Yes	**	0.0017	AB-AD
	shk1as2pck1as2 0 min vs. pomkinshk DMSO	-0.002355	-0.01528 to 0.01057	No	ns	>0.9999	AB-AF
	shk1as2pck1as2 0 min vs. pomkinshk Trt	-0.05943	-0.07231 to -0.04656	Yes	****	<0.0001	AB-AG
	shk1as2pck1as2 0 min vs. pomshkpck DMSO	-0.001585	-0.01433 to 0.01116	No	ns	>0.9999	AB-AI
	shk1as2pck1as2 0 min vs. pomshkpck TRT	-0.03814	-0.05089 to -0.02539	Yes	****	<0.0001	AB-AJ
	shk1as2pck1as2 0 min vs. pom kin pck DMSO	-0.0005274	-0.01354 to 0.01249	No	ns	>0.9999	AB-AL
	shk1as2pck1as2 0 min vs. pom kin pck TRT	-0.03422	-0.04719 to -0.02125	Yes	****	<0.0001	AB-AM
	shk1as2pck1as2 0 min vs. shk kin pck DMSO	-0.001433	-0.01423 to 0.01136	No	ns	>0.9999	AB-AO
	shk1as2pck1as2 0 min vs. shk kin pck TRT	-0.02768	-0.04077 to -0.01460	Yes	****	<0.0001	AB-AP
	shk1as2pck1as2 0 min vs. W.T Cdc15 DMSO	0.0009777	-0.01182 to 0.01377	No	ns	>0.9999	AB-AR
	shk1as2pck1as2 0 min vs. W.T Cdc15 TRT	-0.0002536	-0.01323 to 0.01272	No	ns	>0.9999	AB-AS
	shk1as2pck1as2 DMSO vs. shk1as2pck1as2 0 min	-0.01587	-0.02568 to -0.006060	Yes	****	<0.0001	AC-AD
	shk1as2pck1as2 DMSO vs. pomkinshk DMSO	-0.002073	-0.01131 to 0.007160	No	ns	>0.9999	AC-AF
	shk1as2pck1as2 DMSO vs. pomkinshk Trt	-0.05915	-0.06832 to -0.04999	Yes	****	<0.0001	AC-AG
	shk1as2pck1as2 DMSO vs. pomshkpck DMSO	-0.001303	-0.01028 to 0.007678	No	ns	>0.9999	AC-AI
	shk1as2pck1as2 DMSO vs. pomshkpck TRT	-0.03786	-0.04685 to -0.02886	Yes	****	<0.0001	AC-AJ
	shk1as2pck1as2 DMSO vs. pom kin pck DMSO	-0.0002452	-0.009606 to 0.009116	No	ns	>0.9999	AC-AL
	shk1as2pck1as2 DMSO vs. pom kin pck TRT	-0.03394	-0.04324 to -0.02463	Yes	****	<0.0001	AC-AM
	shk1as2pck1as2 DMSO vs. shk kin pck DMSO	-0.001151	-0.01020 to 0.007904	No	ns	>0.9999	AC-AO
	shk1as2pck1as2 DMSO vs. shk kin pck TRT	-0.0274	-0.03686 to -0.01794	Yes	****	<0.0001	AC-AP
	shk1as2pck1as2 DMSO vs. W.T Cdc15 DMSO	0.00126	-0.007794 to 0.01031	No	ns	>0.9999	AC-AR
	shk1as2pck1as2 DMSO vs. W.T Cdc15 TRT	2.848e-05	-0.009276 to 0.009333	No	ns	>0.9999	AC-AS
	shk1as2pck1as2 0 min vs. pomkinshk DMSO	0.0138	0.004128 to 0.02347	Yes	****	<0.0001	AD-AF
	shk1as2pck1as2 0 min vs. pomkinshk Trt	-0.04328	-0.05289 to -0.03367	Yes	****	<0.0001	AD-AG
	shk1as2pck1as2 0 min vs. pomshkpck DMSO	0.01457	0.005137 to 0.02400	Yes	****	<0.0001	AD-AI
	shk1as2pck1as2 0 min vs. pomshkpck TRT	-0.02198	-0.03143 to -0.01254	Yes	****	<0.0001	AD-AJ
	shk1as2pck1as2 0 min vs. pom kin pck DMSO	0.01563	0.005833 to 0.02542	Yes	****	<0.0001	AD-AL
	shk1as2pck1as2 0 min vs. pom kin pck TRT	-0.01806	-0.02780 to -0.008325	Yes	****	<0.0001	AD-AM
	shk1as2pck1as2 0 min vs. shk kin pck DMSO	0.01472	0.005220 to 0.02422	Yes	****	<0.0001	AD-AO
	shk1as2pck1as2 0 min vs. shk kin pck TRT	-0.01153	-0.02142 to -0.001642	Yes	**	0.0038	AD-AP
	shk1as2pck1as2 0 min vs. W.T Cdc15 DMSO	0.01713	0.007631 to 0.02663	Yes	****	<0.0001	AD-AR
	shk1as2pck1as2 0 min vs. W.T Cdc15 TRT	0.0159	0.006161 to 0.02564	Yes	****	<0.0001	AD-AS
	pomkinshk DMSO vs. pomkinshk Trt	-0.05708	-0.06609 to -0.04806	Yes	****	<0.0001	AF-AG
	pomkinshk DMSO vs. pomshkpck DMSO	0.0007699	-0.008057 to 0.009597	No	ns	>0.9999	AF-AI
	pomkinshk DMSO vs. pomshkpck TRT	-0.03578	-0.04462 to -0.02694	Yes	****	<0.0001	AF-AJ
	pomkinshk DMSO vs. pom kin pck DMSO	0.001828	-0.007385 to 0.01104	No	ns	>0.9999	AF-AL
	pomkinshk DMSO vs. pom kin pck TRT	-0.03186	-0.04102 to -0.02271	Yes	****	<0.0001	AF-AM
	pomkinshk DMSO vs. shk kin pck DMSO	0.0009227	-0.007978 to 0.009824	No	ns	>0.9999	AF-AO
	pomkinshk DMSO vs. shk kin pck TRT	-0.02533	-0.03464 to -0.01601	Yes	****	<0.0001	AF-AP
	pomkinshk DMSO vs. W.T Cdc15 DMSO	0.003333	-0.005568 to 0.01223	No	ns	>0.9999	AF-AR
	pomkinshk DMSO vs. W.T Cdc15 TRT	0.002102	-0.007054 to 0.01126	No	ns	>0.9999	AF-AS
	pomkinshk Trt vs. pomshkpck DMSO	0.05785	0.04909 to 0.06660	Yes	****	<0.0001	AG-AI
	pomkinshk Trt vs. pomshkpck TRT	0.0213	0.01252 to 0.03007	Yes	****	<0.0001	AG-AJ
	pomkinshk Trt vs. pom kin pck DMSO	0.05891	0.04976 to 0.06805	Yes	****	<0.0001	AG-AL
	pomkinshk Trt vs. pom kin pck TRT	0.02521	0.01613 to 0.03430	Yes	****	<0.0001	AG-AM
	pomkinshk Trt vs. shk kin pck DMSO	0.058	0.04917 to 0.06683	Yes	****	<0.0001	AG-AO
	pomkinshk Trt vs. shk kin pck TRT	0.03175	0.02250 to 0.04100	Yes	****	<0.0001	AG-AP
	pomkinshk Trt vs. W.T Cdc15 DMSO	0.06041	0.05158 to 0.06924	Yes	****	<0.0001	AG-AR
	pomkinshk Trt vs. W.T Cdc15 TRT	0.05918	0.05009 to 0.06827	Yes	****	<0.0001	AG-AS
	pomshkpck DMSO vs. pomshkpck TRT	-0.03655	-0.04513 to -0.02797	Yes	****	<0.0001	AI-AJ
	pomshkpck DMSO vs. pom kin pck DMSO	0.001058	-0.007903 to 0.01002	No	ns	>0.9999	AI-AL
	pomshkpck DMSO vs. pom kin pck TRT	-0.03263	-0.04153 to -0.02373	Yes	****	<0.0001	AI-AM
	pomshkpck DMSO vs. shk kin pck DMSO	0.0001528	-0.008487 to 0.008793	No	ns	>0.9999	AI-AO
	pomshkpck DMSO vs. shk kin pck TRT	-0.0261	-0.03516 to -0.01703	Yes	****	<0.0001	AI-AP
	pomshkpck DMSO vs. W.T Cdc15 DMSO	0.002563	-0.006077 to 0.01120	No	ns	>0.9999	AI-AR
	pomshkpck DMSO vs. W.T Cdc15 TRT	0.001332	-0.007570 to 0.01023	No	ns	>0.9999	AI-AS
	pomshkpck TRT vs. pom kin pck DMSO	0.03761	0.02864 to 0.04659	Yes	****	<0.0001	AJ-AL
	pomshkpck TRT vs. pom kin pck TRT	0.00392	-0.004996 to 0.01284	No	ns	0.9998	AJ-AM
	pomshkpck TRT vs. shk kin pck DMSO	0.03671	0.02805 to 0.04536	Yes	****	<0.0001	AJ-AO
	pomshkpck TRT vs. shk kin pck TRT	0.01045	0.001374 to 0.01953	Yes	**	0.0049	AJ-AP
	pomshkpck TRT vs. W.T Cdc15 DMSO	0.03912	0.03046 to 0.04777	Yes	****	<0.0001	AJ-AR
	pomshkpck TRT vs. W.T Cdc15 TRT	0.03788	0.02897 to 0.04680	Yes	****	<0.0001	AJ-AS
	pom kin pck DMSO vs. pom kin pck TRT	-0.03369	-0.04298 to -0.02441	Yes	****	<0.0001	AL-AM
	pom kin pck DMSO vs. shk kin pck DMSO	-0.0009053	-0.009939 to 0.008129	No	ns	>0.9999	AL-AO
	pom kin pck DMSO vs. shk kin pck TRT	-0.02716	-0.03660 to -0.01772	Yes	****	<0.0001	AL-AP
	pom kin pck DMSO vs. W.T Cdc15 DMSO	0.001505	-0.007529 to 0.01054	No	ns	>0.9999	AL-AR
	pom kin pck DMSO vs. W.T Cdc15 TRT	0.0002737	-0.009011 to 0.009559	No	ns	>0.9999	AL-AS
	pom kin pck TRT vs. shk kin pck DMSO	0.03279	0.02381 to 0.04176	Yes	****	<0.0001	AM-AO
	pom kin pck TRT vs. shk kin pck TRT	0.006534	-0.002852 to 0.01592	No	ns	0.7604	AM-AP
	pom kin pck TRT vs. W.T Cdc15 DMSO	0.0352	0.02622 to 0.04417	Yes	****	<0.0001	AM-AR
	pom kin pck TRT vs. W.T Cdc15 TRT	0.03396	0.02474 to 0.04319	Yes	****	<0.0001	AM-AS
	shk kin pck DMSO vs. shk kin pck TRT	-0.02625	-0.03539 to -0.01711	Yes	****	<0.0001	AO-AP
	shk kin pck DMSO vs. W.T Cdc15 DMSO	0.00241	-0.006306 to 0.01113	No	ns	>0.9999	AO-AR
	shk kin pck DMSO vs. W.T Cdc15 TRT	0.001179	-0.007797 to 0.01015	No	ns	>0.9999	AO-AS
	shk kin pck TRT vs. W.T Cdc15 DMSO	0.02866	0.01952 to 0.03780	Yes	****	<0.0001	AP-AR
	shk kin pck TRT vs. W.T Cdc15 TRT	0.02743	0.01805 to 0.03682	Yes	****	<0.0001	AP-AS
	W.T Cdc15 DMSO vs. W.T Cdc15 TRT	-0.001231	-0.01021 to 0.007744	No	ns	>0.9999	AR-AS
	Test details	Mean 1	Mean 2	Mean Diff.	SE of diff.	n1	n2	q	DF
	pom1as1 0 min vs. pom1as1 DMSO	0.003718	0.00214	0.001578	0.003388	42	110	0.6586	4179
	pom1as1 0 min vs. pom1as1Trt	0.003718	0.02611	-0.02239	0.00345	42	97	9.178	4179
	pom1as1 0 min vs. kin1as1 0 min	0.003718	0.0006017	0.003116	0.004029	42	44	1.094	4179
	pom1as1 0 min vs. kin1as1 DMSO	0.003718	0.001381	0.002337	0.003331	42	125	0.9923	4179
	pom1as1 0 min vs. kin1as1 Trt	0.003718	0.01132	-0.0076	0.003444	42	98	3.12	4179
	pom1as1 0 min vs. shk1as2 0 min	0.003718	0.00483	-0.001112	0.003352	42	119	0.4692	4179
	pom1as1 0 min vs. shk1as2 DMSO	0.003718	0.005291	-0.001573	0.003265	42	148	0.6813	4179
	pom1as1 0 min vs. shk1as2 Trt	0.003718	0.01857	-0.01486	0.003288	42	139	6.389	4179
	pom1as1 0 min vs. pck1as2 0 min	0.003718	0.001166	0.002551	0.003655	42	69	0.9872	4179
	pom1as1 0 min vs. pck1as2 DMSO	0.003718	0.001246	0.002472	0.003345	42	121	1.045	4179
	pom1as1 0 min vs. pck1as2 Trt	0.003718	0.005407	-0.00169	0.003352	42	119	0.7128	4179
	pom1as1 0 min vs. pom1as1shk1as2 0 min	0.003718	0.005168	-0.001451	0.003356	42	118	0.6114	4179
	pom1as1 0 min vs. pom1as1shk1as2 DMSO	0.003718	0.004953	-0.001235	0.003356	42	118	0.5207	4179
	pom1as1 0 min vs. pom1as1shk1as2 Trt	0.003718	0.04694	-0.04322	0.003348	42	120	18.25	4179
	pom1as1 0 min vs. pom1as1pck1as2 0 min	0.003718	0.005932	-0.002215	0.004211	42	37	0.7438	4179
	pom1as1 0 min vs. pom1as1pck1as2 DMSO	0.003718	0.002155	0.001562	0.003348	42	120	0.6599	4179
	pom1as1 0 min vs. pom1as1pck1as2 Trt	0.003718	0.02361	-0.01989	0.003352	42	119	8.393	4179
	pom1as1 0 min vs. pom1as1kin1as1 0 min	0.003718	0.002324	0.001393	0.004211	42	37	0.468	4179
	pom1as1 0 min vs. pom1as1kin1as1 DMSO	0.003718	0.003706	1.146e-05	0.003375	42	113	0.004804	4179
	pom1as1 0 min vs. pom1as1kin1as1 Trt	0.003718	0.02748	-0.02376	0.003379	42	112	9.943	4179
	pom1as1 0 min vs. shk1as2kin1as1 0 min	0.003718	0.005092	-0.001375	0.004211	42	37	0.4617	4179
	pom1as1 0 min vs. shk1as2kin1as1 DMSO	0.003718	0.004722	-0.001004	0.003367	42	115	0.4217	4179
	pom1as1 0 min vs. shk1as2kin1as1 Trt	0.003718	0.03016	-0.02645	0.003414	42	104	10.95	4179
	pom1as1 0 min vs. kin1as1pck1as2 0 min	0.003718	0.001558	0.00216	0.004181	42	38	0.7305	4179
	pom1as1 0 min vs. kin1as1pck1as2 DMSO	0.003718	0.001723	0.001995	0.003367	42	115	0.8378	4179
	pom1as1 0 min vs. kin1as1pck1as2 Trt	0.003718	0.01739	-0.01367	0.003379	42	112	5.721	4179
	pom1as1 0 min vs. shk1as2pck1as2 0 min	0.003718	0.003261	0.0004566	0.004075	42	42	0.1584	4179
	pom1as1 0 min vs. shk1as2pck1as2 DMSO	0.003718	0.003543	0.0001745	0.003348	42	120	0.07369	4179
	pom1as1 0 min vs. shk1as2pck1as2 0 min	0.003718	0.01941	-0.0157	0.003429	42	101	6.474	4179
	pom1as1 0 min vs. pomkinshk DMSO	0.003718	0.005616	-0.001899	0.003321	42	128	0.8085	4179
	pom1as1 0 min vs. pomkinshk Trt	0.003718	0.06269	-0.05898	0.003309	42	132	25.21	4179
	pom1as1 0 min vs. pomshkpck DMSO	0.003718	0.004847	-0.001129	0.003275	42	144	0.4874	4179
	pom1as1 0 min vs. pomshkpck TRT	0.003718	0.0414	-0.03768	0.003278	42	143	16.26	4179
	pom1as1 0 min vs. pom kin pck DMSO	0.003718	0.003789	-7.077e-05	0.003345	42	121	0.02992	4179
	pom1as1 0 min vs. pom kin pck TRT	0.003718	0.03748	-0.03376	0.003334	42	124	14.32	4179
	pom1as1 0 min vs. shk kin pck DMSO	0.003718	0.004694	-0.000976	0.003288	42	139	0.4198	4179
	pom1as1 0 min vs. shk kin pck TRT	0.003718	0.03095	-0.02723	0.003363	42	116	11.45	4179
	pom1as1 0 min vs. W.T Cdc15 DMSO	0.003718	0.002284	0.001434	0.003288	42	139	0.6168	4179
	pom1as1 0 min vs. W.T Cdc15 TRT	0.003718	0.003515	0.000203	0.003334	42	124	0.08608	4179
	pom1as1 DMSO vs. pom1as1Trt	0.00214	0.02611	-0.02397	0.002601	110	97	13.03	4179
	pom1as1 DMSO vs. kin1as1 0 min	0.00214	0.0006017	0.001538	0.003331	110	44	0.6531	4179
	pom1as1 DMSO vs. kin1as1 DMSO	0.00214	0.001381	0.0007595	0.002442	110	125	0.4399	4179
	pom1as1 DMSO vs. kin1as1 Trt	0.00214	0.01132	-0.009177	0.002594	110	98	5.003	4179
	pom1as1 DMSO vs. shk1as2 0 min	0.00214	0.00483	-0.00269	0.00247	110	119	1.54	4179
	pom1as1 DMSO vs. shk1as2 DMSO	0.00214	0.005291	-0.003151	0.002351	110	148	1.895	4179
	pom1as1 DMSO vs. shk1as2 Trt	0.00214	0.01857	-0.01643	0.002383	110	139	9.752	4179
	pom1as1 DMSO vs. pck1as2 0 min	0.00214	0.001166	0.0009737	0.002868	110	69	0.4801	4179
	pom1as1 DMSO vs. pck1as2 DMSO	0.00214	0.001246	0.0008943	0.00246	110	121	0.5141	4179
	pom1as1 DMSO vs. pck1as2 Trt	0.00214	0.005407	-0.003267	0.00247	110	119	1.87	4179
	pom1as1 DMSO vs. pom1as1shk1as2 0 min	0.00214	0.005168	-0.003028	0.002475	110	118	1.73	4179
	pom1as1 DMSO vs. pom1as1shk1as2 DMSO	0.00214	0.004953	-0.002813	0.002475	110	118	1.607	4179
	pom1as1 DMSO vs. pom1as1shk1as2 Trt	0.00214	0.04694	-0.04479	0.002465	110	120	25.7	4179
	pom1as1 DMSO vs. pom1as1pck1as2 0 min	0.00214	0.005932	-0.003792	0.003549	110	37	1.511	4179
	pom1as1 DMSO vs. pom1as1pck1as2 DMSO	0.00214	0.002155	-1.522e-05	0.002465	110	120	0.00873	4179
	pom1as1 DMSO vs. pom1as1pck1as2 Trt	0.00214	0.02361	-0.02147	0.00247	110	119	12.29	4179
	pom1as1 DMSO vs. pom1as1kin1as1 0 min	0.00214	0.002324	-0.0001842	0.003549	110	37	0.07337	4179
	pom1as1 DMSO vs. pom1as1kin1as1 DMSO	0.00214	0.003706	-0.001566	0.002502	110	113	0.8854	4179
	pom1as1 DMSO vs. pom1as1kin1as1 Trt	0.00214	0.02748	-0.02534	0.002507	110	112	14.29	4179
	pom1as1 DMSO vs. shk1as2kin1as1 0 min	0.00214	0.005092	-0.002952	0.003549	110	37	1.176	4179
	pom1as1 DMSO vs. shk1as2kin1as1 DMSO	0.00214	0.004722	-0.002582	0.002491	110	115	1.466	4179
	pom1as1 DMSO vs. shk1as2kin1as1 Trt	0.00214	0.03016	-0.02802	0.002554	110	104	15.52	4179
	pom1as1 DMSO vs. kin1as1pck1as2 0 min	0.00214	0.001558	0.0005822	0.003514	110	38	0.2343	4179
	pom1as1 DMSO vs. kin1as1pck1as2 DMSO	0.00214	0.001723	0.0004172	0.002491	110	115	0.2369	4179
	pom1as1 DMSO vs. kin1as1pck1as2 Trt	0.00214	0.01739	-0.01525	0.002507	110	112	8.601	4179
	pom1as1 DMSO vs. shk1as2pck1as2 0 min	0.00214	0.003261	-0.001121	0.003388	110	42	0.468	4179
	pom1as1 DMSO vs. shk1as2pck1as2 DMSO	0.00214	0.003543	-0.001403	0.002465	110	120	0.8049	4179
	pom1as1 DMSO vs. shk1as2pck1as2 0 min	0.00214	0.01941	-0.01727	0.002574	110	101	9.492	4179
	pom1as1 DMSO vs. pomkinshk DMSO	0.00214	0.005616	-0.003476	0.002428	110	128	2.025	4179
	pom1as1 DMSO vs. pomkinshk Trt	0.00214	0.06269	-0.06055	0.002411	110	132	35.52	4179
	pom1as1 DMSO vs. pomshkpck DMSO	0.00214	0.004847	-0.002706	0.002365	110	144	1.618	4179
	pom1as1 DMSO vs. pomshkpck TRT	0.00214	0.0414	-0.03926	0.002369	110	143	23.44	4179
	pom1as1 DMSO vs. pom kin pck DMSO	0.00214	0.003789	-0.001648	0.00246	110	121	0.9475	4179
	pom1as1 DMSO vs. pom kin pck TRT	0.00214	0.03748	-0.03534	0.002446	110	124	20.43	4179
	pom1as1 DMSO vs. shk kin pck DMSO	0.00214	0.004694	-0.002554	0.002383	110	139	1.515	4179
	pom1as1 DMSO vs. shk kin pck TRT	0.00214	0.03095	-0.02881	0.002486	110	116	16.39	4179
	pom1as1 DMSO vs. W.T Cdc15 DMSO	0.00214	0.002284	-0.0001434	0.002383	110	139	0.08507	4179
	pom1as1 DMSO vs. W.T Cdc15 TRT	0.00214	0.003515	-0.001375	0.002446	110	124	0.7947	4179
	pom1as1Trt vs. kin1as1 0 min	0.02611	0.0006017	0.02551	0.003395	97	44	10.63	4179
	pom1as1Trt vs. kin1as1 DMSO	0.02611	0.001381	0.02473	0.002527	97	125	13.84	4179
	pom1as1Trt vs. kin1as1 Trt	0.02611	0.01132	0.01479	0.002675	97	98	7.819	4179
	pom1as1Trt vs. shk1as2 0 min	0.02611	0.00483	0.02128	0.002555	97	119	11.78	4179
	pom1as1Trt vs. shk1as2 DMSO	0.02611	0.005291	0.02082	0.00244	97	148	12.07	4179
	pom1as1Trt vs. shk1as2 Trt	0.02611	0.01857	0.007533	0.002471	97	139	4.312	4179
	pom1as1Trt vs. pck1as2 0 min	0.02611	0.001166	0.02494	0.002941	97	69	11.99	4179
	pom1as1Trt vs. pck1as2 DMSO	0.02611	0.001246	0.02486	0.002545	97	121	13.81	4179
	pom1as1Trt vs. pck1as2 Trt	0.02611	0.005407	0.0207	0.002555	97	119	11.46	4179
	pom1as1Trt vs. pom1as1shk1as2 0 min	0.02611	0.005168	0.02094	0.00256	97	118	11.57	4179
	pom1as1Trt vs. pom1as1shk1as2 DMSO	0.02611	0.004953	0.02115	0.00256	97	118	11.69	4179
	pom1as1Trt vs. pom1as1shk1as2 Trt	0.02611	0.04694	-0.02083	0.00255	97	120	11.55	4179
	pom1as1Trt vs. pom1as1pck1as2 0 min	0.02611	0.005932	0.02017	0.003609	97	37	7.906	4179
	pom1as1Trt vs. pom1as1pck1as2 DMSO	0.02611	0.002155	0.02395	0.00255	97	120	13.28	4179
	pom1as1Trt vs. pom1as1pck1as2 Trt	0.02611	0.02361	0.002495	0.002555	97	119	1.381	4179
	pom1as1Trt vs. pom1as1kin1as1 0 min	0.02611	0.002324	0.02378	0.003609	97	37	9.32	4179
	pom1as1Trt vs. pom1as1kin1as1 DMSO	0.02611	0.003706	0.0224	0.002585	97	113	12.25	4179
	pom1as1Trt vs. pom1as1kin1as1 Trt	0.02611	0.02748	-0.001369	0.00259	97	112	0.7472	4179
	pom1as1Trt vs. shk1as2kin1as1 0 min	0.02611	0.005092	0.02101	0.003609	97	37	8.235	4179
	pom1as1Trt vs. shk1as2kin1as1 DMSO	0.02611	0.004722	0.02139	0.002575	97	115	11.75	4179
	pom1as1Trt vs. shk1as2kin1as1 Trt	0.02611	0.03016	-0.004057	0.002636	97	104	2.177	4179
	pom1as1Trt vs. kin1as1pck1as2 0 min	0.02611	0.001558	0.02455	0.003574	97	38	9.713	4179
	pom1as1Trt vs. kin1as1pck1as2 DMSO	0.02611	0.001723	0.02438	0.002575	97	115	13.39	4179
	pom1as1Trt vs. kin1as1pck1as2 Trt	0.02611	0.01739	0.00872	0.00259	97	112	4.761	4179
	pom1as1Trt vs. shk1as2pck1as2 0 min	0.02611	0.003261	0.02285	0.00345	97	42	9.366	4179
	pom1as1Trt vs. shk1as2pck1as2 DMSO	0.02611	0.003543	0.02256	0.00255	97	120	12.51	4179
	pom1as1Trt vs. shk1as2pck1as2 0 min	0.02611	0.01941	0.006692	0.002655	97	101	3.565	4179
	pom1as1Trt vs. pomkinshk DMSO	0.02611	0.005616	0.02049	0.002514	97	128	11.53	4179
	pom1as1Trt vs. pomkinshk Trt	0.02611	0.06269	-0.03659	0.002498	97	132	20.72	4179
	pom1as1Trt vs. pomshkpck DMSO	0.02611	0.004847	0.02126	0.002453	97	144	12.26	4179
	pom1as1Trt vs. pomshkpck TRT	0.02611	0.0414	-0.01529	0.002457	97	143	8.803	4179
	pom1as1Trt vs. pom kin pck DMSO	0.02611	0.003789	0.02232	0.002545	97	121	12.4	4179
	pom1as1Trt vs. pom kin pck TRT	0.02611	0.03748	-0.01137	0.002532	97	124	6.353	4179
	pom1as1Trt vs. shk kin pck DMSO	0.02611	0.004694	0.02141	0.002471	97	139	12.26	4179
	pom1as1Trt vs. shk kin pck TRT	0.02611	0.03095	-0.004839	0.00257	97	116	2.663	4179
	pom1as1Trt vs. W.T Cdc15 DMSO	0.02611	0.002284	0.02382	0.002471	97	139	13.64	4179
	pom1as1Trt vs. W.T Cdc15 TRT	0.02611	0.003515	0.02259	0.002532	97	124	12.62	4179
	kin1as1 0 min vs. kin1as1 DMSO	0.0006017	0.001381	-0.000779	0.003274	44	125	0.3365	4179
	kin1as1 0 min vs. kin1as1 Trt	0.0006017	0.01132	-0.01072	0.003389	44	98	4.471	4179
	kin1as1 0 min vs. shk1as2 0 min	0.0006017	0.00483	-0.004228	0.003295	44	119	1.815	4179
	kin1as1 0 min vs. shk1as2 DMSO	0.0006017	0.005291	-0.004689	0.003207	44	148	2.068	4179
	kin1as1 0 min vs. shk1as2 Trt	0.0006017	0.01857	-0.01797	0.003231	44	139	7.868	4179
	kin1as1 0 min vs. pck1as2 0 min	0.0006017	0.001166	-0.0005647	0.003603	44	69	0.2217	4179
	kin1as1 0 min vs. pck1as2 DMSO	0.0006017	0.001246	-0.0006441	0.003288	44	121	0.2771	4179
	kin1as1 0 min vs. pck1as2 Trt	0.0006017	0.005407	-0.004806	0.003295	44	119	2.062	4179
	kin1as1 0 min vs. pom1as1shk1as2 0 min	0.0006017	0.005168	-0.004567	0.003299	44	118	1.958	4179
	kin1as1 0 min vs. pom1as1shk1as2 DMSO	0.0006017	0.004953	-0.004352	0.003299	44	118	1.865	4179
	kin1as1 0 min vs. pom1as1shk1as2 Trt	0.0006017	0.04694	-0.04633	0.003291	44	120	19.91	4179
	kin1as1 0 min vs. pom1as1pck1as2 0 min	0.0006017	0.005932	-0.005331	0.004166	44	37	1.81	4179
	kin1as1 0 min vs. pom1as1pck1as2 DMSO	0.0006017	0.002155	-0.001554	0.003291	44	120	0.6676	4179
	kin1as1 0 min vs. pom1as1pck1as2 Trt	0.0006017	0.02361	-0.02301	0.003295	44	119	9.875	4179
	kin1as1 0 min vs. pom1as1kin1as1 0 min	0.0006017	0.002324	-0.001723	0.004166	44	37	0.5848	4179
	kin1as1 0 min vs. pom1as1kin1as1 DMSO	0.0006017	0.003706	-0.003105	0.003319	44	113	1.323	4179
	kin1as1 0 min vs. pom1as1kin1as1 Trt	0.0006017	0.02748	-0.02687	0.003323	44	112	11.44	4179
	kin1as1 0 min vs. shk1as2kin1as1 0 min	0.0006017	0.005092	-0.004491	0.004166	44	37	1.525	4179
	kin1as1 0 min vs. shk1as2kin1as1 DMSO	0.0006017	0.004722	-0.00412	0.003311	44	115	1.76	4179
	kin1as1 0 min vs. shk1as2kin1as1 Trt	0.0006017	0.03016	-0.02956	0.003359	44	104	12.45	4179
	kin1as1 0 min vs. kin1as1pck1as2 0 min	0.0006017	0.001558	-0.0009562	0.004136	44	38	0.327	4179
	kin1as1 0 min vs. kin1as1pck1as2 DMSO	0.0006017	0.001723	-0.001121	0.003311	44	115	0.479	4179
	kin1as1 0 min vs. kin1as1pck1as2 Trt	0.0006017	0.01739	-0.01679	0.003323	44	112	7.144	4179
	kin1as1 0 min vs. shk1as2pck1as2 0 min	0.0006017	0.003261	-0.002659	0.004029	44	42	0.9335	4179
	kin1as1 0 min vs. shk1as2pck1as2 DMSO	0.0006017	0.003543	-0.002942	0.003291	44	120	1.264	4179
	kin1as1 0 min vs. shk1as2pck1as2 0 min	0.0006017	0.01941	-0.01881	0.003374	44	101	7.887	4179
	kin1as1 0 min vs. pomkinshk DMSO	0.0006017	0.005616	-0.005015	0.003264	44	128	2.173	4179
	kin1as1 0 min vs. pomkinshk Trt	0.0006017	0.06269	-0.06209	0.003251	44	132	27.01	4179
	kin1as1 0 min vs. pomshkpck DMSO	0.0006017	0.004847	-0.004245	0.003217	44	144	1.866	4179
	kin1as1 0 min vs. pomshkpck TRT	0.0006017	0.0414	-0.0408	0.00322	44	143	17.92	4179
	kin1as1 0 min vs. pom kin pck DMSO	0.0006017	0.003789	-0.003187	0.003288	44	121	1.371	4179
	kin1as1 0 min vs. pom kin pck TRT	0.0006017	0.03748	-0.03688	0.003277	44	124	15.91	4179
	kin1as1 0 min vs. shk kin pck DMSO	0.0006017	0.004694	-0.004092	0.003231	44	139	1.791	4179
	kin1as1 0 min vs. shk kin pck TRT	0.0006017	0.03095	-0.03034	0.003307	44	116	12.98	4179
	kin1as1 0 min vs. W.T Cdc15 DMSO	0.0006017	0.002284	-0.001682	0.003231	44	139	0.7362	4179
	kin1as1 0 min vs. W.T Cdc15 TRT	0.0006017	0.003515	-0.002913	0.003277	44	124	1.257	4179
	kin1as1 DMSO vs. kin1as1 Trt	0.001381	0.01132	-0.009937	0.00252	125	98	5.577	4179
	kin1as1 DMSO vs. shk1as2 0 min	0.001381	0.00483	-0.003449	0.002392	125	119	2.039	4179
	kin1as1 DMSO vs. shk1as2 DMSO	0.001381	0.005291	-0.00391	0.002269	125	148	2.437	4179
	kin1as1 DMSO vs. shk1as2 Trt	0.001381	0.01857	-0.01719	0.002302	125	139	10.56	4179
	kin1as1 DMSO vs. pck1as2 0 min	0.001381	0.001166	0.0002143	0.002801	125	69	0.1082	4179
	kin1as1 DMSO vs. pck1as2 DMSO	0.001381	0.001246	0.0001349	0.002382	125	121	0.08008	4179
	kin1as1 DMSO vs. pck1as2 Trt	0.001381	0.005407	-0.004027	0.002392	125	119	2.381	4179
	kin1as1 DMSO vs. pom1as1shk1as2 0 min	0.001381	0.005168	-0.003788	0.002397	125	118	2.235	4179
	kin1as1 DMSO vs. pom1as1shk1as2 DMSO	0.001381	0.004953	-0.003573	0.002397	125	118	2.108	4179
	kin1as1 DMSO vs. pom1as1shk1as2 Trt	0.001381	0.04694	-0.04555	0.002387	125	120	26.99	4179
	kin1as1 DMSO vs. pom1as1pck1as2 0 min	0.001381	0.005932	-0.004552	0.003495	125	37	1.842	4179
	kin1as1 DMSO vs. pom1as1pck1as2 DMSO	0.001381	0.002155	-0.0007747	0.002387	125	120	0.459	4179
	kin1as1 DMSO vs. pom1as1pck1as2 Trt	0.001381	0.02361	-0.02223	0.002392	125	119	13.14	4179
	kin1as1 DMSO vs. pom1as1kin1as1 0 min	0.001381	0.002324	-0.0009436	0.003495	125	37	0.3818	4179
	kin1as1 DMSO vs. pom1as1kin1as1 DMSO	0.001381	0.003706	-0.002326	0.002424	125	113	1.357	4179
	kin1as1 DMSO vs. pom1as1kin1as1 Trt	0.001381	0.02748	-0.02609	0.00243	125	112	15.19	4179
	kin1as1 DMSO vs. shk1as2kin1as1 0 min	0.001381	0.005092	-0.003712	0.003495	125	37	1.502	4179
	kin1as1 DMSO vs. shk1as2kin1as1 DMSO	0.001381	0.004722	-0.003341	0.002413	125	115	1.958	4179
	kin1as1 DMSO vs. shk1as2kin1as1 Trt	0.001381	0.03016	-0.02878	0.002479	125	104	16.42	4179
	kin1as1 DMSO vs. kin1as1pck1as2 0 min	0.001381	0.001558	-0.0001772	0.00346	125	38	0.07245	4179
	kin1as1 DMSO vs. kin1as1pck1as2 DMSO	0.001381	0.001723	-0.0003422	0.002413	125	115	0.2006	4179
	kin1as1 DMSO vs. kin1as1pck1as2 Trt	0.001381	0.01739	-0.01601	0.00243	125	112	9.316	4179
	kin1as1 DMSO vs. shk1as2pck1as2 0 min	0.001381	0.003261	-0.00188	0.003331	125	42	0.7984	4179
	kin1as1 DMSO vs. shk1as2pck1as2 DMSO	0.001381	0.003543	-0.002163	0.002387	125	120	1.281	4179
	kin1as1 DMSO vs. shk1as2pck1as2 0 min	0.001381	0.01941	-0.01803	0.002499	125	101	10.21	4179
	kin1as1 DMSO vs. pomkinshk DMSO	0.001381	0.005616	-0.004236	0.002348	125	128	2.551	4179
	kin1as1 DMSO vs. pomkinshk Trt	0.001381	0.06269	-0.06131	0.002331	125	132	37.2	4179
	kin1as1 DMSO vs. pomshkpck DMSO	0.001381	0.004847	-0.003466	0.002283	125	144	2.147	4179
	kin1as1 DMSO vs. pomshkpck TRT	0.001381	0.0414	-0.04002	0.002287	125	143	24.75	4179
	kin1as1 DMSO vs. pom kin pck DMSO	0.001381	0.003789	-0.002408	0.002382	125	121	1.43	4179
	kin1as1 DMSO vs. pom kin pck TRT	0.001381	0.03748	-0.0361	0.002367	125	124	21.57	4179
	kin1as1 DMSO vs. shk kin pck DMSO	0.001381	0.004694	-0.003313	0.002302	125	139	2.035	4179
	kin1as1 DMSO vs. shk kin pck TRT	0.001381	0.03095	-0.02957	0.002408	125	116	17.37	4179
	kin1as1 DMSO vs. W.T Cdc15 DMSO	0.001381	0.002284	-0.0009028	0.002302	125	139	0.5546	4179
	kin1as1 DMSO vs. W.T Cdc15 TRT	0.001381	0.003515	-0.002134	0.002367	125	124	1.275	4179
	kin1as1 Trt vs. shk1as2 0 min	0.01132	0.00483	0.006487	0.002548	98	119	3.601	4179
	kin1as1 Trt vs. shk1as2 DMSO	0.01132	0.005291	0.006026	0.002432	98	148	3.504	4179
	kin1as1 Trt vs. shk1as2 Trt	0.01132	0.01857	-0.007257	0.002463	98	139	4.166	4179
	kin1as1 Trt vs. pck1as2 0 min	0.01132	0.001166	0.01015	0.002935	98	69	4.891	4179
	kin1as1 Trt vs. pck1as2 DMSO	0.01132	0.001246	0.01007	0.002538	98	121	5.612	4179
	kin1as1 Trt vs. pck1as2 Trt	0.01132	0.005407	0.00591	0.002548	98	119	3.281	4179
	kin1as1 Trt vs. pom1as1shk1as2 0 min	0.01132	0.005168	0.006149	0.002552	98	118	3.407	4179
	kin1as1 Trt vs. pom1as1shk1as2 DMSO	0.01132	0.004953	0.006364	0.002552	98	118	3.526	4179
	kin1as1 Trt vs. pom1as1shk1as2 Trt	0.01132	0.04694	-0.03562	0.002543	98	120	19.81	4179
	kin1as1 Trt vs. pom1as1pck1as2 0 min	0.01132	0.005932	0.005385	0.003604	98	37	2.113	4179
	kin1as1 Trt vs. pom1as1pck1as2 DMSO	0.01132	0.002155	0.009162	0.002543	98	120	5.096	4179
	kin1as1 Trt vs. pom1as1pck1as2 Trt	0.01132	0.02361	-0.01229	0.002548	98	119	6.825	4179
	kin1as1 Trt vs. pom1as1kin1as1 0 min	0.01132	0.002324	0.008993	0.003604	98	37	3.529	4179
	kin1as1 Trt vs. pom1as1kin1as1 DMSO	0.01132	0.003706	0.007611	0.002578	98	113	4.175	4179
	kin1as1 Trt vs. pom1as1kin1as1 Trt	0.01132	0.02748	-0.01616	0.002583	98	112	8.846	4179
	kin1as1 Trt vs. shk1as2kin1as1 0 min	0.01132	0.005092	0.006225	0.003604	98	37	2.443	4179
	kin1as1 Trt vs. shk1as2kin1as1 DMSO	0.01132	0.004722	0.006596	0.002568	98	115	3.633	4179
	kin1as1 Trt vs. shk1as2kin1as1 Trt	0.01132	0.03016	-0.01885	0.002629	98	104	10.14	4179
	kin1as1 Trt vs. kin1as1pck1as2 0 min	0.01132	0.001558	0.009759	0.003569	98	38	3.867	4179
	kin1as1 Trt vs. kin1as1pck1as2 DMSO	0.01132	0.001723	0.009594	0.002568	98	115	5.285	4179
	kin1as1 Trt vs. kin1as1pck1as2 Trt	0.01132	0.01739	-0.00607	0.002583	98	112	3.323	4179
	kin1as1 Trt vs. shk1as2pck1as2 0 min	0.01132	0.003261	0.008056	0.003444	98	42	3.308	4179
	kin1as1 Trt vs. shk1as2pck1as2 DMSO	0.01132	0.003543	0.007774	0.002543	98	120	4.324	4179
	kin1as1 Trt vs. shk1as2pck1as2 0 min	0.01132	0.01941	-0.008097	0.002648	98	101	4.324	4179
	kin1as1 Trt vs. pomkinshk DMSO	0.01132	0.005616	0.005701	0.002507	98	128	3.216	4179
	kin1as1 Trt vs. pomkinshk Trt	0.01132	0.06269	-0.05138	0.00249	98	132	29.18	4179
	kin1as1 Trt vs. pomshkpck DMSO	0.01132	0.004847	0.006471	0.002446	98	144	3.742	4179
	kin1as1 Trt vs. pomshkpck TRT	0.01132	0.0414	-0.03008	0.002449	98	143	17.37	4179
	kin1as1 Trt vs. pom kin pck DMSO	0.01132	0.003789	0.007529	0.002538	98	121	4.195	4179
	kin1as1 Trt vs. pom kin pck TRT	0.01132	0.03748	-0.02616	0.002524	98	124	14.66	4179
	kin1as1 Trt vs. shk kin pck DMSO	0.01132	0.004694	0.006623	0.002463	98	139	3.802	4179
	kin1as1 Trt vs. shk kin pck TRT	0.01132	0.03095	-0.01963	0.002562	98	116	10.83	4179
	kin1as1 Trt vs. W.T Cdc15 DMSO	0.01132	0.002284	0.009034	0.002463	98	139	5.186	4179
	kin1as1 Trt vs. W.T Cdc15 TRT	0.01132	0.003515	0.007802	0.002524	98	124	4.371	4179
	shk1as2 0 min vs. shk1as2 DMSO	0.00483	0.005291	-0.000461	0.0023	119	148	0.2835	4179
	shk1as2 0 min vs. shk1as2 Trt	0.00483	0.01857	-0.01374	0.002332	119	139	8.333	4179
	shk1as2 0 min vs. pck1as2 0 min	0.00483	0.001166	0.003663	0.002826	119	69	1.833	4179
	shk1as2 0 min vs. pck1as2 DMSO	0.00483	0.001246	0.003584	0.002411	119	121	2.102	4179
	shk1as2 0 min vs. pck1as2 Trt	0.00483	0.005407	-0.0005774	0.002421	119	119	0.3373	4179
	shk1as2 0 min vs. pom1as1shk1as2 0 min	0.00483	0.005168	-0.0003386	0.002426	119	118	0.1973	4179
	shk1as2 0 min vs. pom1as1shk1as2 DMSO	0.00483	0.004953	-0.0001234	0.002426	119	118	0.07193	4179
	shk1as2 0 min vs. pom1as1shk1as2 Trt	0.00483	0.04694	-0.04211	0.002416	119	120	24.65	4179
	shk1as2 0 min vs. pom1as1pck1as2 0 min	0.00483	0.005932	-0.001103	0.003515	119	37	0.4435	4179
	shk1as2 0 min vs. pom1as1pck1as2 DMSO	0.00483	0.002155	0.002674	0.002416	119	120	1.565	4179
	shk1as2 0 min vs. pom1as1pck1as2 Trt	0.00483	0.02361	-0.01878	0.002421	119	119	10.97	4179
	shk1as2 0 min vs. pom1as1kin1as1 0 min	0.00483	0.002324	0.002506	0.003515	119	37	1.008	4179
	shk1as2 0 min vs. pom1as1kin1as1 DMSO	0.00483	0.003706	0.001124	0.002453	119	113	0.6477	4179
	shk1as2 0 min vs. pom1as1kin1as1 Trt	0.00483	0.02748	-0.02265	0.002459	119	112	13.03	4179
	shk1as2 0 min vs. shk1as2kin1as1 0 min	0.00483	0.005092	-0.0002626	0.003515	119	37	0.1057	4179
	shk1as2 0 min vs. shk1as2kin1as1 DMSO	0.00483	0.004722	0.0001081	0.002442	119	115	0.06257	4179
	shk1as2 0 min vs. shk1as2kin1as1 Trt	0.00483	0.03016	-0.02533	0.002507	119	104	14.29	4179
	shk1as2 0 min vs. kin1as1pck1as2 0 min	0.00483	0.001558	0.003272	0.00348	119	38	1.33	4179
	shk1as2 0 min vs. kin1as1pck1as2 DMSO	0.00483	0.001723	0.003107	0.002442	119	115	1.799	4179
	shk1as2 0 min vs. kin1as1pck1as2 Trt	0.00483	0.01739	-0.01256	0.002459	119	112	7.223	4179
	shk1as2 0 min vs. shk1as2pck1as2 0 min	0.00483	0.003261	0.001569	0.003352	119	42	0.6618	4179
	shk1as2 0 min vs. shk1as2pck1as2 DMSO	0.00483	0.003543	0.001287	0.002416	119	120	0.753	4179
	shk1as2 0 min vs. shk1as2pck1as2 0 min	0.00483	0.01941	-0.01458	0.002527	119	101	8.163	4179
	shk1as2 0 min vs. pomkinshk DMSO	0.00483	0.005616	-0.0007866	0.002378	119	128	0.4678	4179
	shk1as2 0 min vs. pomkinshk Trt	0.00483	0.06269	-0.05786	0.002361	119	132	34.66	4179
	shk1as2 0 min vs. pomshkpck DMSO	0.00483	0.004847	-1.673e-05	0.002314	119	144	0.01022	4179
	shk1as2 0 min vs. pomshkpck TRT	0.00483	0.0414	-0.03657	0.002317	119	143	22.32	4179
	shk1as2 0 min vs. pom kin pck DMSO	0.00483	0.003789	0.001041	0.002411	119	121	0.6108	4179
	shk1as2 0 min vs. pom kin pck TRT	0.00483	0.03748	-0.03265	0.002397	119	124	19.27	4179
	shk1as2 0 min vs. shk kin pck DMSO	0.00483	0.004694	0.000136	0.002332	119	139	0.08247	4179
	shk1as2 0 min vs. shk kin pck TRT	0.00483	0.03095	-0.02612	0.002437	119	116	15.16	4179
	shk1as2 0 min vs. W.T Cdc15 DMSO	0.00483	0.002284	0.002546	0.002332	119	139	1.544	4179
	shk1as2 0 min vs. W.T Cdc15 TRT	0.00483	0.003515	0.001315	0.002397	119	124	0.776	4179
	shk1as2 DMSO vs. shk1as2 Trt	0.005291	0.01857	-0.01328	0.002206	148	139	8.516	4179
	shk1as2 DMSO vs. pck1as2 0 min	0.005291	0.001166	0.004124	0.002722	148	69	2.142	4179
	shk1as2 DMSO vs. pck1as2 DMSO	0.005291	0.001246	0.004045	0.002289	148	121	2.499	4179
	shk1as2 DMSO vs. pck1as2 Trt	0.005291	0.005407	-0.0001165	0.0023	148	119	0.07163	4179
	shk1as2 DMSO vs. pom1as1shk1as2 0 min	0.005291	0.005168	0.0001224	0.002305	148	118	0.0751	4179
	shk1as2 DMSO vs. pom1as1shk1as2 DMSO	0.005291	0.004953	0.0003376	0.002305	148	118	0.2071	4179
	shk1as2 DMSO vs. pom1as1shk1as2 Trt	0.005291	0.04694	-0.04164	0.002294	148	120	25.67	4179
	shk1as2 DMSO vs. pom1as1pck1as2 0 min	0.005291	0.005932	-0.0006415	0.003433	148	37	0.2643	4179
	shk1as2 DMSO vs. pom1as1pck1as2 DMSO	0.005291	0.002155	0.003135	0.002294	148	120	1.933	4179
	shk1as2 DMSO vs. pom1as1pck1as2 Trt	0.005291	0.02361	-0.01832	0.0023	148	119	11.27	4179
	shk1as2 DMSO vs. pom1as1kin1as1 0 min	0.005291	0.002324	0.002967	0.003433	148	37	1.222	4179
	shk1as2 DMSO vs. pom1as1kin1as1 DMSO	0.005291	0.003706	0.001584	0.002333	148	113	0.9604	4179
	shk1as2 DMSO vs. pom1as1kin1as1 Trt	0.005291	0.02748	-0.02218	0.002339	148	112	13.41	4179
	shk1as2 DMSO vs. shk1as2kin1as1 0 min	0.005291	0.005092	0.0001983	0.003433	148	37	0.08171	4179
	shk1as2 DMSO vs. shk1as2kin1as1 DMSO	0.005291	0.004722	0.000569	0.002322	148	115	0.3466	4179
	shk1as2 DMSO vs. shk1as2kin1as1 Trt	0.005291	0.03016	-0.02487	0.00239	148	104	14.72	4179
	shk1as2 DMSO vs. kin1as1pck1as2 0 min	0.005291	0.001558	0.003733	0.003396	148	38	1.554	4179
	shk1as2 DMSO vs. kin1as1pck1as2 DMSO	0.005291	0.001723	0.003568	0.002322	148	115	2.173	4179
	shk1as2 DMSO vs. kin1as1pck1as2 Trt	0.005291	0.01739	-0.0121	0.002339	148	112	7.314	4179
	shk1as2 DMSO vs. shk1as2pck1as2 0 min	0.005291	0.003261	0.00203	0.003265	148	42	0.8791	4179
	shk1as2 DMSO vs. shk1as2pck1as2 DMSO	0.005291	0.003543	0.001748	0.002294	148	120	1.077	4179
	shk1as2 DMSO vs. shk1as2pck1as2 0 min	0.005291	0.01941	-0.01412	0.00241	148	101	8.287	4179
	shk1as2 DMSO vs. pomkinshk DMSO	0.005291	0.005616	-0.0003257	0.002254	148	128	0.2043	4179
	shk1as2 DMSO vs. pomkinshk Trt	0.005291	0.06269	-0.0574	0.002236	148	132	36.31	4179
	shk1as2 DMSO vs. pomshkpck DMSO	0.005291	0.004847	0.0004442	0.002186	148	144	0.2874	4179
	shk1as2 DMSO vs. pomshkpck TRT	0.005291	0.0414	-0.03611	0.00219	148	143	23.32	4179
	shk1as2 DMSO vs. pom kin pck DMSO	0.005291	0.003789	0.001502	0.002289	148	121	0.9282	4179
	shk1as2 DMSO vs. pom kin pck TRT	0.005291	0.03748	-0.03219	0.002274	148	124	20.02	4179
	shk1as2 DMSO vs. shk kin pck DMSO	0.005291	0.004694	0.000597	0.002206	148	139	0.3827	4179
	shk1as2 DMSO vs. shk kin pck TRT	0.005291	0.03095	-0.02565	0.002316	148	116	15.67	4179
	shk1as2 DMSO vs. W.T Cdc15 DMSO	0.005291	0.002284	0.003007	0.002206	148	139	1.928	4179
	shk1as2 DMSO vs. W.T Cdc15 TRT	0.005291	0.003515	0.001776	0.002274	148	124	1.105	4179
	shk1as2 Trt vs. pck1as2 0 min	0.01857	0.001166	0.01741	0.00275	139	69	8.951	4179
	shk1as2 Trt vs. pck1as2 DMSO	0.01857	0.001246	0.01733	0.002322	139	121	10.55	4179
	shk1as2 Trt vs. pck1as2 Trt	0.01857	0.005407	0.01317	0.002332	139	119	7.983	4179
	shk1as2 Trt vs. pom1as1shk1as2 0 min	0.01857	0.005168	0.01341	0.002338	139	118	8.11	4179
	shk1as2 Trt vs. pom1as1shk1as2 DMSO	0.01857	0.004953	0.01362	0.002338	139	118	8.24	4179
	shk1as2 Trt vs. pom1as1shk1as2 Trt	0.01857	0.04694	-0.02836	0.002327	139	120	17.23	4179
	shk1as2 Trt vs. pom1as1pck1as2 0 min	0.01857	0.005932	0.01264	0.003455	139	37	5.175	4179
	shk1as2 Trt vs. pom1as1pck1as2 DMSO	0.01857	0.002155	0.01642	0.002327	139	120	9.977	4179
	shk1as2 Trt vs. pom1as1pck1as2 Trt	0.01857	0.02361	-0.005038	0.002332	139	119	3.054	4179
	shk1as2 Trt vs. pom1as1kin1as1 0 min	0.01857	0.002324	0.01625	0.003455	139	37	6.652	4179
	shk1as2 Trt vs. pom1as1kin1as1 DMSO	0.01857	0.003706	0.01487	0.002366	139	113	8.888	4179
	shk1as2 Trt vs. pom1as1kin1as1 Trt	0.01857	0.02748	-0.008902	0.002371	139	112	5.309	4179
	shk1as2 Trt vs. shk1as2kin1as1 0 min	0.01857	0.005092	0.01348	0.003455	139	37	5.518	4179
	shk1as2 Trt vs. shk1as2kin1as1 DMSO	0.01857	0.004722	0.01385	0.002354	139	115	8.321	4179
	shk1as2 Trt vs. shk1as2kin1as1 Trt	0.01857	0.03016	-0.01159	0.002421	139	104	6.769	4179
	shk1as2 Trt vs. kin1as1pck1as2 0 min	0.01857	0.001558	0.01702	0.003419	139	38	7.039	4179
	shk1as2 Trt vs. kin1as1pck1as2 DMSO	0.01857	0.001723	0.01685	0.002354	139	115	10.12	4179
	shk1as2 Trt vs. kin1as1pck1as2 Trt	0.01857	0.01739	0.001187	0.002371	139	112	0.708	4179
	shk1as2 Trt vs. shk1as2pck1as2 0 min	0.01857	0.003261	0.01531	0.003288	139	42	6.585	4179
	shk1as2 Trt vs. shk1as2pck1as2 DMSO	0.01857	0.003543	0.01503	0.002327	139	120	9.134	4179
	shk1as2 Trt vs. shk1as2pck1as2 0 min	0.01857	0.01941	-0.0008406	0.002442	139	101	0.4868	4179
	shk1as2 Trt vs. pomkinshk DMSO	0.01857	0.005616	0.01296	0.002288	139	128	8.01	4179
	shk1as2 Trt vs. pomkinshk Trt	0.01857	0.06269	-0.04412	0.00227	139	132	27.49	4179
	shk1as2 Trt vs. pomshkpck DMSO	0.01857	0.004847	0.01373	0.002221	139	144	8.742	4179
	shk1as2 Trt vs. pomshkpck TRT	0.01857	0.0414	-0.02283	0.002225	139	143	14.51	4179
	shk1as2 Trt vs. pom kin pck DMSO	0.01857	0.003789	0.01479	0.002322	139	121	9.005	4179
	shk1as2 Trt vs. pom kin pck TRT	0.01857	0.03748	-0.01891	0.002307	139	124	11.59	4179
	shk1as2 Trt vs. shk kin pck DMSO	0.01857	0.004694	0.01388	0.00224	139	139	8.762	4179
	shk1as2 Trt vs. shk kin pck TRT	0.01857	0.03095	-0.01237	0.002349	139	116	7.449	4179
	shk1as2 Trt vs. W.T Cdc15 DMSO	0.01857	0.002284	0.01629	0.00224	139	139	10.28	4179
	shk1as2 Trt vs. W.T Cdc15 TRT	0.01857	0.003515	0.01506	0.002307	139	124	9.231	4179
	pck1as2 0 min vs. pck1as2 DMSO	0.001166	0.001246	-7.941e-05	0.002817	69	121	0.03986	4179
	pck1as2 0 min vs. pck1as2 Trt	0.001166	0.005407	-0.004241	0.002826	69	119	2.122	4179
	pck1as2 0 min vs. pom1as1shk1as2 0 min	0.001166	0.005168	-0.004002	0.00283	69	118	2	4179
	pck1as2 0 min vs. pom1as1shk1as2 DMSO	0.001166	0.004953	-0.003787	0.00283	69	118	1.892	4179
	pck1as2 0 min vs. pom1as1shk1as2 Trt	0.001166	0.04694	-0.04577	0.002822	69	120	22.94	4179
	pck1as2 0 min vs. pom1as1pck1as2 0 min	0.001166	0.005932	-0.004766	0.003806	69	37	1.771	4179
	pck1as2 0 min vs. pom1as1pck1as2 DMSO	0.001166	0.002155	-0.000989	0.002822	69	120	0.4957	4179
	pck1as2 0 min vs. pom1as1pck1as2 Trt	0.001166	0.02361	-0.02245	0.002826	69	119	11.23	4179
	pck1as2 0 min vs. pom1as1kin1as1 0 min	0.001166	0.002324	-0.001158	0.003806	69	37	0.4303	4179
	pck1as2 0 min vs. pom1as1kin1as1 DMSO	0.001166	0.003706	-0.00254	0.002853	69	113	1.259	4179
	pck1as2 0 min vs. pom1as1kin1as1 Trt	0.001166	0.02748	-0.02631	0.002858	69	112	13.02	4179
	pck1as2 0 min vs. shk1as2kin1as1 0 min	0.001166	0.005092	-0.003926	0.003806	69	37	1.459	4179
	pck1as2 0 min vs. shk1as2kin1as1 DMSO	0.001166	0.004722	-0.003555	0.002844	69	115	1.768	4179
	pck1as2 0 min vs. shk1as2kin1as1 Trt	0.001166	0.03016	-0.029	0.0029	69	104	14.14	4179
	pck1as2 0 min vs. kin1as1pck1as2 0 min	0.001166	0.001558	-0.0003915	0.003773	69	38	0.1468	4179
	pck1as2 0 min vs. kin1as1pck1as2 DMSO	0.001166	0.001723	-0.0005565	0.002844	69	115	0.2767	4179
	pck1as2 0 min vs. kin1as1pck1as2 Trt	0.001166	0.01739	-0.01622	0.002858	69	112	8.026	4179
	pck1as2 0 min vs. shk1as2pck1as2 0 min	0.001166	0.003261	-0.002095	0.003655	69	42	0.8105	4179
	pck1as2 0 min vs. shk1as2pck1as2 DMSO	0.001166	0.003543	-0.002377	0.002822	69	120	1.191	4179
	pck1as2 0 min vs. shk1as2pck1as2 0 min	0.001166	0.01941	-0.01825	0.002917	69	101	8.847	4179
	pck1as2 0 min vs. pomkinshk DMSO	0.001166	0.005616	-0.00445	0.002789	69	128	2.256	4179
	pck1as2 0 min vs. pomkinshk Trt	0.001166	0.06269	-0.06153	0.002774	69	132	31.36	4179
	pck1as2 0 min vs. pomshkpck DMSO	0.001166	0.004847	-0.00368	0.002734	69	144	1.903	4179
	pck1as2 0 min vs. pomshkpck TRT	0.001166	0.0414	-0.04023	0.002738	69	143	20.78	4179
	pck1as2 0 min vs. pom kin pck DMSO	0.001166	0.003789	-0.002622	0.002817	69	121	1.316	4179
	pck1as2 0 min vs. pom kin pck TRT	0.001166	0.03748	-0.03631	0.002805	69	124	18.31	4179
	pck1as2 0 min vs. shk kin pck DMSO	0.001166	0.004694	-0.003527	0.00275	69	139	1.814	4179
	pck1as2 0 min vs. shk kin pck TRT	0.001166	0.03095	-0.02978	0.002839	69	116	14.83	4179
	pck1as2 0 min vs. W.T Cdc15 DMSO	0.001166	0.002284	-0.001117	0.00275	69	139	0.5744	4179
	pck1as2 0 min vs. W.T Cdc15 TRT	0.001166	0.003515	-0.002348	0.002805	69	124	1.184	4179
	pck1as2 DMSO vs. pck1as2 Trt	0.001246	0.005407	-0.004161	0.002411	121	119	2.441	4179
	pck1as2 DMSO vs. pom1as1shk1as2 0 min	0.001246	0.005168	-0.003923	0.002416	121	118	2.296	4179
	pck1as2 DMSO vs. pom1as1shk1as2 DMSO	0.001246	0.004953	-0.003707	0.002416	121	118	2.17	4179
	pck1as2 DMSO vs. pom1as1shk1as2 Trt	0.001246	0.04694	-0.04569	0.002406	121	120	26.85	4179
	pck1as2 DMSO vs. pom1as1pck1as2 0 min	0.001246	0.005932	-0.004687	0.003508	121	37	1.889	4179
	pck1as2 DMSO vs. pom1as1pck1as2 DMSO	0.001246	0.002155	-0.0009095	0.002406	121	120	0.5346	4179
	pck1as2 DMSO vs. pom1as1pck1as2 Trt	0.001246	0.02361	-0.02237	0.002411	121	119	13.12	4179
	pck1as2 DMSO vs. pom1as1kin1as1 0 min	0.001246	0.002324	-0.001078	0.003508	121	37	0.4347	4179
	pck1as2 DMSO vs. pom1as1kin1as1 DMSO	0.001246	0.003706	-0.00246	0.002443	121	113	1.424	4179
	pck1as2 DMSO vs. pom1as1kin1as1 Trt	0.001246	0.02748	-0.02623	0.002449	121	112	15.15	4179
	pck1as2 DMSO vs. shk1as2kin1as1 0 min	0.001246	0.005092	-0.003847	0.003508	121	37	1.551	4179
	pck1as2 DMSO vs. shk1as2kin1as1 DMSO	0.001246	0.004722	-0.003476	0.002432	121	115	2.021	4179
	pck1as2 DMSO vs. shk1as2kin1as1 Trt	0.001246	0.03016	-0.02892	0.002497	121	104	16.38	4179
	pck1as2 DMSO vs. kin1as1pck1as2 0 min	0.001246	0.001558	-0.0003121	0.003473	121	38	0.1271	4179
	pck1as2 DMSO vs. kin1as1pck1as2 DMSO	0.001246	0.001723	-0.0004771	0.002432	121	115	0.2774	4179
	pck1as2 DMSO vs. kin1as1pck1as2 Trt	0.001246	0.01739	-0.01614	0.002449	121	112	9.321	4179
	pck1as2 DMSO vs. shk1as2pck1as2 0 min	0.001246	0.003261	-0.002015	0.003345	121	42	0.8521	4179
	pck1as2 DMSO vs. shk1as2pck1as2 DMSO	0.001246	0.003543	-0.002297	0.002406	121	120	1.35	4179
	pck1as2 DMSO vs. shk1as2pck1as2 0 min	0.001246	0.01941	-0.01817	0.002517	121	101	10.21	4179
	pck1as2 DMSO vs. pomkinshk DMSO	0.001246	0.005616	-0.004371	0.002368	121	128	2.61	4179
	pck1as2 DMSO vs. pomkinshk Trt	0.001246	0.06269	-0.06145	0.002351	121	132	36.97	4179
	pck1as2 DMSO vs. pomshkpck DMSO	0.001246	0.004847	-0.003601	0.002303	121	144	2.211	4179
	pck1as2 DMSO vs. pomshkpck TRT	0.001246	0.0414	-0.04015	0.002307	121	143	24.62	4179
	pck1as2 DMSO vs. pom kin pck DMSO	0.001246	0.003789	-0.002543	0.002401	121	121	1.498	4179
	pck1as2 DMSO vs. pom kin pck TRT	0.001246	0.03748	-0.03623	0.002387	121	124	21.47	4179
	pck1as2 DMSO vs. shk kin pck DMSO	0.001246	0.004694	-0.003448	0.002322	121	139	2.1	4179
	pck1as2 DMSO vs. shk kin pck TRT	0.001246	0.03095	-0.0297	0.002427	121	116	17.31	4179
	pck1as2 DMSO vs. W.T Cdc15 DMSO	0.001246	0.002284	-0.001038	0.002322	121	139	0.632	4179
	pck1as2 DMSO vs. W.T Cdc15 TRT	0.001246	0.003515	-0.002269	0.002387	121	124	1.345	4179
	pck1as2 Trt vs. pom1as1shk1as2 0 min	0.005407	0.005168	0.0002389	0.002426	119	118	0.1392	4179
	pck1as2 Trt vs. pom1as1shk1as2 DMSO	0.005407	0.004953	0.000454	0.002426	119	118	0.2646	4179
	pck1as2 Trt vs. pom1as1shk1as2 Trt	0.005407	0.04694	-0.04153	0.002416	119	120	24.31	4179
	pck1as2 Trt vs. pom1as1pck1as2 0 min	0.005407	0.005932	-0.0005251	0.003515	119	37	0.2112	4179
	pck1as2 Trt vs. pom1as1pck1as2 DMSO	0.005407	0.002155	0.003252	0.002416	119	120	1.903	4179
	pck1as2 Trt vs. pom1as1pck1as2 Trt	0.005407	0.02361	-0.0182	0.002421	119	119	10.63	4179
	pck1as2 Trt vs. pom1as1kin1as1 0 min	0.005407	0.002324	0.003083	0.003515	119	37	1.24	4179
	pck1as2 Trt vs. pom1as1kin1as1 DMSO	0.005407	0.003706	0.001701	0.002453	119	113	0.9806	4179
	pck1as2 Trt vs. pom1as1kin1as1 Trt	0.005407	0.02748	-0.02207	0.002459	119	112	12.69	4179
	pck1as2 Trt vs. shk1as2kin1as1 0 min	0.005407	0.005092	0.0003148	0.003515	119	37	0.1266	4179
	pck1as2 Trt vs. shk1as2kin1as1 DMSO	0.005407	0.004722	0.0006855	0.002442	119	115	0.397	4179
	pck1as2 Trt vs. shk1as2kin1as1 Trt	0.005407	0.03016	-0.02476	0.002507	119	104	13.97	4179
	pck1as2 Trt vs. kin1as1pck1as2 0 min	0.005407	0.001558	0.003849	0.00348	119	38	1.564	4179
	pck1as2 Trt vs. kin1as1pck1as2 DMSO	0.005407	0.001723	0.003684	0.002442	119	115	2.134	4179
	pck1as2 Trt vs. kin1as1pck1as2 Trt	0.005407	0.01739	-0.01198	0.002459	119	112	6.89	4179
	pck1as2 Trt vs. shk1as2pck1as2 0 min	0.005407	0.003261	0.002146	0.003352	119	42	0.9055	4179
	pck1as2 Trt vs. shk1as2pck1as2 DMSO	0.005407	0.003543	0.001864	0.002416	119	120	1.091	4179
	pck1as2 Trt vs. shk1as2pck1as2 0 min	0.005407	0.01941	-0.01401	0.002527	119	101	7.84	4179
	pck1as2 Trt vs. pomkinshk DMSO	0.005407	0.005616	-0.0002092	0.002378	119	128	0.1244	4179
	pck1as2 Trt vs. pomkinshk Trt	0.005407	0.06269	-0.05729	0.002361	119	132	34.32	4179
	pck1as2 Trt vs. pomshkpck DMSO	0.005407	0.004847	0.0005607	0.002314	119	144	0.3427	4179
	pck1as2 Trt vs. pomshkpck TRT	0.005407	0.0414	-0.03599	0.002317	119	143	21.96	4179
	pck1as2 Trt vs. pom kin pck DMSO	0.005407	0.003789	0.001619	0.002411	119	121	0.9494	4179
	pck1as2 Trt vs. pom kin pck TRT	0.005407	0.03748	-0.03207	0.002397	119	124	18.93	4179
	pck1as2 Trt vs. shk kin pck DMSO	0.005407	0.004694	0.0007135	0.002332	119	139	0.4326	4179
	pck1as2 Trt vs. shk kin pck TRT	0.005407	0.03095	-0.02554	0.002437	119	116	14.82	4179
	pck1as2 Trt vs. W.T Cdc15 DMSO	0.005407	0.002284	0.003124	0.002332	119	139	1.894	4179
	pck1as2 Trt vs. W.T Cdc15 TRT	0.005407	0.003515	0.001892	0.002397	119	124	1.117	4179
	pom1as1shk1as2 0 min vs. pom1as1shk1as2 DMSO	0.005168	0.004953	0.0002152	0.002431	118	118	0.1252	4179
	pom1as1shk1as2 0 min vs. pom1as1shk1as2 Trt	0.005168	0.04694	-0.04177	0.002421	118	120	24.4	4179
	pom1as1shk1as2 0 min vs. pom1as1pck1as2 0 min	0.005168	0.005932	-0.0007639	0.003519	118	37	0.307	4179
	pom1as1shk1as2 0 min vs. pom1as1pck1as2 DMSO	0.005168	0.002155	0.003013	0.002421	118	120	1.76	4179
	pom1as1shk1as2 0 min vs. pom1as1pck1as2 Trt	0.005168	0.02361	-0.01844	0.002426	118	119	10.75	4179
	pom1as1shk1as2 0 min vs. pom1as1kin1as1 0 min	0.005168	0.002324	0.002844	0.003519	118	37	1.143	4179
	pom1as1shk1as2 0 min vs. pom1as1kin1as1 DMSO	0.005168	0.003706	0.001462	0.002458	118	113	0.8412	4179
	pom1as1shk1as2 0 min vs. pom1as1kin1as1 Trt	0.005168	0.02748	-0.02231	0.002464	118	112	12.8	4179
	pom1as1shk1as2 0 min vs. shk1as2kin1as1 0 min	0.005168	0.005092	7.594e-05	0.003519	118	37	0.03052	4179
	pom1as1shk1as2 0 min vs. shk1as2kin1as1 DMSO	0.005168	0.004722	0.0004466	0.002447	118	115	0.2581	4179
	pom1as1shk1as2 0 min vs. shk1as2kin1as1 Trt	0.005168	0.03016	-0.025	0.002512	118	104	14.07	4179
	pom1as1shk1as2 0 min vs. kin1as1pck1as2 0 min	0.005168	0.001558	0.00361	0.003483	118	38	1.466	4179
	pom1as1shk1as2 0 min vs. kin1as1pck1as2 DMSO	0.005168	0.001723	0.003445	0.002447	118	115	1.991	4179
	pom1as1shk1as2 0 min vs. kin1as1pck1as2 Trt	0.005168	0.01739	-0.01222	0.002464	118	112	7.013	4179
	pom1as1shk1as2 0 min vs. shk1as2pck1as2 0 min	0.005168	0.003261	0.001907	0.003356	118	42	0.8038	4179
	pom1as1shk1as2 0 min vs. shk1as2pck1as2 DMSO	0.005168	0.003543	0.001625	0.002421	118	120	0.9492	4179
	pom1as1shk1as2 0 min vs. shk1as2pck1as2 0 min	0.005168	0.01941	-0.01425	0.002532	118	101	7.958	4179
	pom1as1shk1as2 0 min vs. pomkinshk DMSO	0.005168	0.005616	-0.0004481	0.002383	118	128	0.2659	4179
	pom1as1shk1as2 0 min vs. pomkinshk Trt	0.005168	0.06269	-0.05753	0.002366	118	132	34.38	4179
	pom1as1shk1as2 0 min vs. pomshkpck DMSO	0.005168	0.004847	0.0003218	0.002319	118	144	0.1963	4179
	pom1as1shk1as2 0 min vs. pomshkpck TRT	0.005168	0.0414	-0.03623	0.002323	118	143	22.06	4179
	pom1as1shk1as2 0 min vs. pom kin pck DMSO	0.005168	0.003789	0.00138	0.002416	118	121	0.8076	4179
	pom1as1shk1as2 0 min vs. pom kin pck TRT	0.005168	0.03748	-0.03231	0.002402	118	124	19.02	4179
	pom1as1shk1as2 0 min vs. shk kin pck DMSO	0.005168	0.004694	0.0004746	0.002338	118	139	0.2871	4179
	pom1as1shk1as2 0 min vs. shk kin pck TRT	0.005168	0.03095	-0.02578	0.002442	118	116	14.93	4179
	pom1as1shk1as2 0 min vs. W.T Cdc15 DMSO	0.005168	0.002284	0.002885	0.002338	118	139	1.745	4179
	pom1as1shk1as2 0 min vs. W.T Cdc15 TRT	0.005168	0.003515	0.001654	0.002402	118	124	0.9737	4179
	pom1as1shk1as2 DMSO vs. pom1as1shk1as2 Trt	0.004953	0.04694	-0.04198	0.002421	118	120	24.52	4179
	pom1as1shk1as2 DMSO vs. pom1as1pck1as2 0 min	0.004953	0.005932	-0.0009791	0.003519	118	37	0.3935	4179
	pom1as1shk1as2 DMSO vs. pom1as1pck1as2 DMSO	0.004953	0.002155	0.002798	0.002421	118	120	1.634	4179
	pom1as1shk1as2 DMSO vs. pom1as1pck1as2 Trt	0.004953	0.02361	-0.01866	0.002426	118	119	10.88	4179
	pom1as1shk1as2 DMSO vs. pom1as1kin1as1 0 min	0.004953	0.002324	0.002629	0.003519	118	37	1.057	4179
	pom1as1shk1as2 DMSO vs. pom1as1kin1as1 DMSO	0.004953	0.003706	0.001247	0.002458	118	113	0.7174	4179
	pom1as1shk1as2 DMSO vs. pom1as1kin1as1 Trt	0.004953	0.02748	-0.02252	0.002464	118	112	12.93	4179
	pom1as1shk1as2 DMSO vs. shk1as2kin1as1 0 min	0.004953	0.005092	-0.0001392	0.003519	118	37	0.05596	4179
	pom1as1shk1as2 DMSO vs. shk1as2kin1as1 DMSO	0.004953	0.004722	0.0002315	0.002447	118	115	0.1338	4179
	pom1as1shk1as2 DMSO vs. shk1as2kin1as1 Trt	0.004953	0.03016	-0.02521	0.002512	118	104	14.19	4179
	pom1as1shk1as2 DMSO vs. kin1as1pck1as2 0 min	0.004953	0.001558	0.003395	0.003483	118	38	1.378	4179
	pom1as1shk1as2 DMSO vs. kin1as1pck1as2 DMSO	0.004953	0.001723	0.00323	0.002447	118	115	1.867	4179
	pom1as1shk1as2 DMSO vs. kin1as1pck1as2 Trt	0.004953	0.01739	-0.01243	0.002464	118	112	7.137	4179
	pom1as1shk1as2 DMSO vs. shk1as2pck1as2 0 min	0.004953	0.003261	0.001692	0.003356	118	42	0.7131	4179
	pom1as1shk1as2 DMSO vs. shk1as2pck1as2 DMSO	0.004953	0.003543	0.00141	0.002421	118	120	0.8235	4179
	pom1as1shk1as2 DMSO vs. shk1as2pck1as2 0 min	0.004953	0.01941	-0.01446	0.002532	118	101	8.078	4179
	pom1as1shk1as2 DMSO vs. pomkinshk DMSO	0.004953	0.005616	-0.0006632	0.002383	118	128	0.3935	4179
	pom1as1shk1as2 DMSO vs. pomkinshk Trt	0.004953	0.06269	-0.05774	0.002366	118	132	34.51	4179
	pom1as1shk1as2 DMSO vs. pomshkpck DMSO	0.004953	0.004847	0.0001067	0.002319	118	144	0.06505	4179
	pom1as1shk1as2 DMSO vs. pomshkpck TRT	0.004953	0.0414	-0.03645	0.002323	118	143	22.19	4179
	pom1as1shk1as2 DMSO vs. pom kin pck DMSO	0.004953	0.003789	0.001165	0.002416	118	121	0.6817	4179
	pom1as1shk1as2 DMSO vs. pom kin pck TRT	0.004953	0.03748	-0.03253	0.002402	118	124	19.15	4179
	pom1as1shk1as2 DMSO vs. shk kin pck DMSO	0.004953	0.004694	0.0002594	0.002338	118	139	0.1569	4179
	pom1as1shk1as2 DMSO vs. shk kin pck TRT	0.004953	0.03095	-0.02599	0.002442	118	116	15.05	4179
	pom1as1shk1as2 DMSO vs. W.T Cdc15 DMSO	0.004953	0.002284	0.00267	0.002338	118	139	1.615	4179
	pom1as1shk1as2 DMSO vs. W.T Cdc15 TRT	0.004953	0.003515	0.001438	0.002402	118	124	0.847	4179
	pom1as1shk1as2 Trt vs. pom1as1pck1as2 0 min	0.04694	0.005932	0.041	0.003512	120	37	16.51	4179
	pom1as1shk1as2 Trt vs. pom1as1pck1as2 DMSO	0.04694	0.002155	0.04478	0.002411	120	120	26.27	4179
	pom1as1shk1as2 Trt vs. pom1as1pck1as2 Trt	0.04694	0.02361	0.02332	0.002416	120	119	13.65	4179
	pom1as1shk1as2 Trt vs. pom1as1kin1as1 0 min	0.04694	0.002324	0.04461	0.003512	120	37	17.96	4179
	pom1as1shk1as2 Trt vs. pom1as1kin1as1 DMSO	0.04694	0.003706	0.04323	0.002448	120	113	24.97	4179
	pom1as1shk1as2 Trt vs. pom1as1kin1as1 Trt	0.04694	0.02748	0.01946	0.002454	120	112	11.22	4179
	pom1as1shk1as2 Trt vs. shk1as2kin1as1 0 min	0.04694	0.005092	0.04184	0.003512	120	37	16.85	4179
	pom1as1shk1as2 Trt vs. shk1as2kin1as1 DMSO	0.04694	0.004722	0.04221	0.002437	120	115	24.5	4179
	pom1as1shk1as2 Trt vs. shk1as2kin1as1 Trt	0.04694	0.03016	0.01677	0.002502	120	104	9.479	4179
	pom1as1shk1as2 Trt vs. kin1as1pck1as2 0 min	0.04694	0.001558	0.04538	0.003476	120	38	18.46	4179
	pom1as1shk1as2 Trt vs. kin1as1pck1as2 DMSO	0.04694	0.001723	0.04521	0.002437	120	115	26.24	4179
	pom1as1shk1as2 Trt vs. kin1as1pck1as2 Trt	0.04694	0.01739	0.02955	0.002454	120	112	17.03	4179
	pom1as1shk1as2 Trt vs. shk1as2pck1as2 0 min	0.04694	0.003261	0.04367	0.003348	120	42	18.45	4179
	pom1as1shk1as2 Trt vs. shk1as2pck1as2 DMSO	0.04694	0.003543	0.04339	0.002411	120	120	25.45	4179
	pom1as1shk1as2 Trt vs. shk1as2pck1as2 0 min	0.04694	0.01941	0.02752	0.002522	120	101	15.43	4179
	pom1as1shk1as2 Trt vs. pomkinshk DMSO	0.04694	0.005616	0.04132	0.002373	120	128	24.62	4179
	pom1as1shk1as2 Trt vs. pomkinshk Trt	0.04694	0.06269	-0.01576	0.002356	120	132	9.461	4179
	pom1as1shk1as2 Trt vs. pomshkpck DMSO	0.04694	0.004847	0.04209	0.002308	120	144	25.78	4179
	pom1as1shk1as2 Trt vs. pomshkpck TRT	0.04694	0.0414	0.005536	0.002312	120	143	3.386	4179
	pom1as1shk1as2 Trt vs. pom kin pck DMSO	0.04694	0.003789	0.04315	0.002406	120	121	25.36	4179
	pom1as1shk1as2 Trt vs. pom kin pck TRT	0.04694	0.03748	0.009456	0.002392	120	124	5.592	4179
	pom1as1shk1as2 Trt vs. shk kin pck DMSO	0.04694	0.004694	0.04224	0.002327	120	139	25.67	4179
	pom1as1shk1as2 Trt vs. shk kin pck TRT	0.04694	0.03095	0.01599	0.002432	120	116	9.299	4179
	pom1as1shk1as2 Trt vs. W.T Cdc15 DMSO	0.04694	0.002284	0.04465	0.002327	120	139	27.13	4179
	pom1as1shk1as2 Trt vs. W.T Cdc15 TRT	0.04694	0.003515	0.04342	0.002392	120	124	25.68	4179
	pom1as1pck1as2 0 min vs. pom1as1pck1as2 DMSO	0.005932	0.002155	0.003777	0.003512	37	120	1.521	4179
	pom1as1pck1as2 0 min vs. pom1as1pck1as2 Trt	0.005932	0.02361	-0.01768	0.003515	37	119	7.112	4179
	pom1as1pck1as2 0 min vs. pom1as1kin1as1 0 min	0.005932	0.002324	0.003608	0.004342	37	37	1.175	4179
	pom1as1pck1as2 0 min vs. pom1as1kin1as1 DMSO	0.005932	0.003706	0.002226	0.003537	37	113	0.8899	4179
	pom1as1pck1as2 0 min vs. pom1as1kin1as1 Trt	0.005932	0.02748	-0.02154	0.003541	37	112	8.603	4179
	pom1as1pck1as2 0 min vs. shk1as2kin1as1 0 min	0.005932	0.005092	0.0008399	0.004342	37	37	0.2735	4179
	pom1as1pck1as2 0 min vs. shk1as2kin1as1 DMSO	0.005932	0.004722	0.001211	0.00353	37	115	0.485	4179
	pom1as1pck1as2 0 min vs. shk1as2kin1as1 Trt	0.005932	0.03016	-0.02423	0.003575	37	104	9.586	4179
	pom1as1pck1as2 0 min vs. kin1as1pck1as2 0 min	0.005932	0.001558	0.004374	0.004313	37	38	1.434	4179
	pom1as1pck1as2 0 min vs. kin1as1pck1as2 DMSO	0.005932	0.001723	0.004209	0.00353	37	115	1.686	4179
	pom1as1pck1as2 0 min vs. kin1as1pck1as2 Trt	0.005932	0.01739	-0.01145	0.003541	37	112	4.574	4179
	pom1as1pck1as2 0 min vs. shk1as2pck1as2 0 min	0.005932	0.003261	0.002671	0.004211	37	42	0.8971	4179
	pom1as1pck1as2 0 min vs. shk1as2pck1as2 DMSO	0.005932	0.003543	0.002389	0.003512	37	120	0.962	4179
	pom1as1pck1as2 0 min vs. shk1as2pck1as2 0 min	0.005932	0.01941	-0.01348	0.003589	37	101	5.313	4179
	pom1as1pck1as2 0 min vs. pomkinshk DMSO	0.005932	0.005616	0.0003159	0.003486	37	128	0.1281	4179
	pom1as1pck1as2 0 min vs. pomkinshk Trt	0.005932	0.06269	-0.05676	0.003474	37	132	23.11	4179
	pom1as1pck1as2 0 min vs. pomshkpck DMSO	0.005932	0.004847	0.001086	0.003442	37	144	0.4461	4179
	pom1as1pck1as2 0 min vs. pomshkpck TRT	0.005932	0.0414	-0.03547	0.003445	37	143	14.56	4179
	pom1as1pck1as2 0 min vs. pom kin pck DMSO	0.005932	0.003789	0.002144	0.003508	37	121	0.8641	4179
	pom1as1pck1as2 0 min vs. pom kin pck TRT	0.005932	0.03748	-0.03155	0.003499	37	124	12.75	4179
	pom1as1pck1as2 0 min vs. shk kin pck DMSO	0.005932	0.004694	0.001239	0.003455	37	139	0.507	4179
	pom1as1pck1as2 0 min vs. shk kin pck TRT	0.005932	0.03095	-0.02501	0.003526	37	116	10.03	4179
	pom1as1pck1as2 0 min vs. W.T Cdc15 DMSO	0.005932	0.002284	0.003649	0.003455	37	139	1.494	4179
	pom1as1pck1as2 0 min vs. W.T Cdc15 TRT	0.005932	0.003515	0.002418	0.003499	37	124	0.9772	4179
	pom1as1pck1as2 DMSO vs. pom1as1pck1as2 Trt	0.002155	0.02361	-0.02146	0.002416	120	119	12.56	4179
	pom1as1pck1as2 DMSO vs. pom1as1kin1as1 0 min	0.002155	0.002324	-0.0001689	0.003512	120	37	0.06803	4179
	pom1as1pck1as2 DMSO vs. pom1as1kin1as1 DMSO	0.002155	0.003706	-0.001551	0.002448	120	113	0.8959	4179
	pom1as1pck1as2 DMSO vs. pom1as1kin1as1 Trt	0.002155	0.02748	-0.02532	0.002454	120	112	14.59	4179
	pom1as1pck1as2 DMSO vs. shk1as2kin1as1 0 min	0.002155	0.005092	-0.002937	0.003512	120	37	1.183	4179
	pom1as1pck1as2 DMSO vs. shk1as2kin1as1 DMSO	0.002155	0.004722	-0.002566	0.002437	120	115	1.489	4179
	pom1as1pck1as2 DMSO vs. shk1as2kin1as1 Trt	0.002155	0.03016	-0.02801	0.002502	120	104	15.83	4179
	pom1as1pck1as2 DMSO vs. kin1as1pck1as2 0 min	0.002155	0.001558	0.0005974	0.003476	120	38	0.243	4179
	pom1as1pck1as2 DMSO vs. kin1as1pck1as2 DMSO	0.002155	0.001723	0.0004324	0.002437	120	115	0.2509	4179
	pom1as1pck1as2 DMSO vs. kin1as1pck1as2 Trt	0.002155	0.01739	-0.01523	0.002454	120	112	8.779	4179
	pom1as1pck1as2 DMSO vs. shk1as2pck1as2 0 min	0.002155	0.003261	-0.001106	0.003348	120	42	0.4671	4179
	pom1as1pck1as2 DMSO vs. shk1as2pck1as2 DMSO	0.002155	0.003543	-0.001388	0.002411	120	120	0.8141	4179
	pom1as1pck1as2 DMSO vs. shk1as2pck1as2 0 min	0.002155	0.01941	-0.01726	0.002522	120	101	9.678	4179
	pom1as1pck1as2 DMSO vs. pomkinshk DMSO	0.002155	0.005616	-0.003461	0.002373	120	128	2.063	4179
	pom1as1pck1as2 DMSO vs. pomkinshk Trt	0.002155	0.06269	-0.06054	0.002356	120	132	36.34	4179
	pom1as1pck1as2 DMSO vs. pomshkpck DMSO	0.002155	0.004847	-0.002691	0.002308	120	144	1.649	4179
	pom1as1pck1as2 DMSO vs. pomshkpck TRT	0.002155	0.0414	-0.03924	0.002312	120	143	24	4179
	pom1as1pck1as2 DMSO vs. pom kin pck DMSO	0.002155	0.003789	-0.001633	0.002406	120	121	0.9599	4179
	pom1as1pck1as2 DMSO vs. pom kin pck TRT	0.002155	0.03748	-0.03532	0.002392	120	124	20.89	4179
	pom1as1pck1as2 DMSO vs. shk kin pck DMSO	0.002155	0.004694	-0.002538	0.002327	120	139	1.543	4179
	pom1as1pck1as2 DMSO vs. shk kin pck TRT	0.002155	0.03095	-0.02879	0.002432	120	116	16.74	4179
	pom1as1pck1as2 DMSO vs. W.T Cdc15 DMSO	0.002155	0.002284	-0.0001282	0.002327	120	139	0.07788	4179
	pom1as1pck1as2 DMSO vs. W.T Cdc15 TRT	0.002155	0.003515	-0.001359	0.002392	120	124	0.8039	4179
	pom1as1pck1as2 Trt vs. pom1as1kin1as1 0 min	0.02361	0.002324	0.02129	0.003515	119	37	8.564	4179
	pom1as1pck1as2 Trt vs. pom1as1kin1as1 DMSO	0.02361	0.003706	0.01991	0.002453	119	113	11.48	4179
	pom1as1pck1as2 Trt vs. pom1as1kin1as1 Trt	0.02361	0.02748	-0.003864	0.002459	119	112	2.222	4179
	pom1as1pck1as2 Trt vs. shk1as2kin1as1 0 min	0.02361	0.005092	0.01852	0.003515	119	37	7.45	4179
	pom1as1pck1as2 Trt vs. shk1as2kin1as1 DMSO	0.02361	0.004722	0.01889	0.002442	119	115	10.94	4179
	pom1as1pck1as2 Trt vs. shk1as2kin1as1 Trt	0.02361	0.03016	-0.006553	0.002507	119	104	3.696	4179
	pom1as1pck1as2 Trt vs. kin1as1pck1as2 0 min	0.02361	0.001558	0.02205	0.00348	119	38	8.962	4179
	pom1as1pck1as2 Trt vs. kin1as1pck1as2 DMSO	0.02361	0.001723	0.02189	0.002442	119	115	12.68	4179
	pom1as1pck1as2 Trt vs. kin1as1pck1as2 Trt	0.02361	0.01739	0.006225	0.002459	119	112	3.58	4179
	pom1as1pck1as2 Trt vs. shk1as2pck1as2 0 min	0.02361	0.003261	0.02035	0.003352	119	42	8.586	4179
	pom1as1pck1as2 Trt vs. shk1as2pck1as2 DMSO	0.02361	0.003543	0.02007	0.002416	119	120	11.75	4179
	pom1as1pck1as2 Trt vs. shk1as2pck1as2 0 min	0.02361	0.01941	0.004197	0.002527	119	101	2.349	4179
	pom1as1pck1as2 Trt vs. pomkinshk DMSO	0.02361	0.005616	0.018	0.002378	119	128	10.7	4179
	pom1as1pck1as2 Trt vs. pomkinshk Trt	0.02361	0.06269	-0.03908	0.002361	119	132	23.41	4179
	pom1as1pck1as2 Trt vs. pomshkpck DMSO	0.02361	0.004847	0.01877	0.002314	119	144	11.47	4179
	pom1as1pck1as2 Trt vs. pomshkpck TRT	0.02361	0.0414	-0.01779	0.002317	119	143	10.86	4179
	pom1as1pck1as2 Trt vs. pom kin pck DMSO	0.02361	0.003789	0.01982	0.002411	119	121	11.63	4179
	pom1as1pck1as2 Trt vs. pom kin pck TRT	0.02361	0.03748	-0.01387	0.002397	119	124	8.183	4179
	pom1as1pck1as2 Trt vs. shk kin pck DMSO	0.02361	0.004694	0.01892	0.002332	119	139	11.47	4179
	pom1as1pck1as2 Trt vs. shk kin pck TRT	0.02361	0.03095	-0.007334	0.002437	119	116	4.256	4179
	pom1as1pck1as2 Trt vs. W.T Cdc15 DMSO	0.02361	0.002284	0.02133	0.002332	119	139	12.93	4179
	pom1as1pck1as2 Trt vs. W.T Cdc15 TRT	0.02361	0.003515	0.0201	0.002397	119	124	11.86	4179
	pom1as1kin1as1 0 min vs. pom1as1kin1as1 DMSO	0.002324	0.003706	-0.001382	0.003537	37	113	0.5525	4179
	pom1as1kin1as1 0 min vs. pom1as1kin1as1 Trt	0.002324	0.02748	-0.02515	0.003541	37	112	10.04	4179
	pom1as1kin1as1 0 min vs. shk1as2kin1as1 0 min	0.002324	0.005092	-0.002768	0.004342	37	37	0.9016	4179
	pom1as1kin1as1 0 min vs. shk1as2kin1as1 DMSO	0.002324	0.004722	-0.002397	0.00353	37	115	0.9605	4179
	pom1as1kin1as1 0 min vs. shk1as2kin1as1 Trt	0.002324	0.03016	-0.02784	0.003575	37	104	11.01	4179
	pom1as1kin1as1 0 min vs. kin1as1pck1as2 0 min	0.002324	0.001558	0.0007664	0.004313	37	38	0.2513	4179
	pom1as1kin1as1 0 min vs. kin1as1pck1as2 DMSO	0.002324	0.001723	0.0006014	0.00353	37	115	0.2409	4179
	pom1as1kin1as1 0 min vs. kin1as1pck1as2 Trt	0.002324	0.01739	-0.01506	0.003541	37	112	6.015	4179
	pom1as1kin1as1 0 min vs. shk1as2pck1as2 0 min	0.002324	0.003261	-0.0009369	0.004211	37	42	0.3146	4179
	pom1as1kin1as1 0 min vs. shk1as2pck1as2 DMSO	0.002324	0.003543	-0.001219	0.003512	37	120	0.4909	4179
	pom1as1kin1as1 0 min vs. shk1as2pck1as2 0 min	0.002324	0.01941	-0.01709	0.003589	37	101	6.734	4179
	pom1as1kin1as1 0 min vs. pomkinshk DMSO	0.002324	0.005616	-0.003292	0.003486	37	128	1.336	4179
	pom1as1kin1as1 0 min vs. pomkinshk Trt	0.002324	0.06269	-0.06037	0.003474	37	132	24.57	4179
	pom1as1kin1as1 0 min vs. pomshkpck DMSO	0.002324	0.004847	-0.002522	0.003442	37	144	1.036	4179
	pom1as1kin1as1 0 min vs. pomshkpck TRT	0.002324	0.0414	-0.03907	0.003445	37	143	16.04	4179
	pom1as1kin1as1 0 min vs. pom kin pck DMSO	0.002324	0.003789	-0.001464	0.003508	37	121	0.5902	4179
	pom1as1kin1as1 0 min vs. pom kin pck TRT	0.002324	0.03748	-0.03515	0.003499	37	124	14.21	4179
	pom1as1kin1as1 0 min vs. shk kin pck DMSO	0.002324	0.004694	-0.00237	0.003455	37	139	0.9699	4179
	pom1as1kin1as1 0 min vs. shk kin pck TRT	0.002324	0.03095	-0.02862	0.003526	37	116	11.48	4179
	pom1as1kin1as1 0 min vs. W.T Cdc15 DMSO	0.002324	0.002284	4.078e-05	0.003455	37	139	0.01669	4179
	pom1as1kin1as1 0 min vs. W.T Cdc15 TRT	0.002324	0.003515	-0.001191	0.003499	37	124	0.4812	4179
	pom1as1kin1as1 DMSO vs. pom1as1kin1as1 Trt	0.003706	0.02748	-0.02377	0.00249	113	112	13.5	4179
	pom1as1kin1as1 DMSO vs. shk1as2kin1as1 0 min	0.003706	0.005092	-0.001386	0.003537	113	37	0.5542	4179
	pom1as1kin1as1 DMSO vs. shk1as2kin1as1 DMSO	0.003706	0.004722	-0.001015	0.002474	113	115	0.5805	4179
	pom1as1kin1as1 DMSO vs. shk1as2kin1as1 Trt	0.003706	0.03016	-0.02646	0.002538	113	104	14.74	4179
	pom1as1kin1as1 DMSO vs. kin1as1pck1as2 0 min	0.003706	0.001558	0.002148	0.003502	113	38	0.8675	4179
	pom1as1kin1as1 DMSO vs. kin1as1pck1as2 DMSO	0.003706	0.001723	0.001983	0.002474	113	115	1.134	4179
	pom1as1kin1as1 DMSO vs. kin1as1pck1as2 Trt	0.003706	0.01739	-0.01368	0.00249	113	112	7.769	4179
	pom1as1kin1as1 DMSO vs. shk1as2pck1as2 0 min	0.003706	0.003261	0.0004451	0.003375	113	42	0.1865	4179
	pom1as1kin1as1 DMSO vs. shk1as2pck1as2 DMSO	0.003706	0.003543	0.000163	0.002448	113	120	0.09417	4179
	pom1as1kin1as1 DMSO vs. shk1as2pck1as2 0 min	0.003706	0.01941	-0.01571	0.002557	113	101	8.687	4179
	pom1as1kin1as1 DMSO vs. pomkinshk DMSO	0.003706	0.005616	-0.00191	0.002411	113	128	1.121	4179
	pom1as1kin1as1 DMSO vs. pomkinshk Trt	0.003706	0.06269	-0.05899	0.002394	113	132	34.85	4179
	pom1as1kin1as1 DMSO vs. pomshkpck DMSO	0.003706	0.004847	-0.00114	0.002347	113	144	0.687	4179
	pom1as1kin1as1 DMSO vs. pomshkpck TRT	0.003706	0.0414	-0.03769	0.002351	113	143	22.68	4179
	pom1as1kin1as1 DMSO vs. pom kin pck DMSO	0.003706	0.003789	-8.223e-05	0.002443	113	121	0.0476	4179
	pom1as1kin1as1 DMSO vs. pom kin pck TRT	0.003706	0.03748	-0.03377	0.002429	113	124	19.66	4179
	pom1as1kin1as1 DMSO vs. shk kin pck DMSO	0.003706	0.004694	-0.0009875	0.002366	113	139	0.5904	4179
	pom1as1kin1as1 DMSO vs. shk kin pck TRT	0.003706	0.03095	-0.02724	0.002469	113	116	15.61	4179
	pom1as1kin1as1 DMSO vs. W.T Cdc15 DMSO	0.003706	0.002284	0.001423	0.002366	113	139	0.8506	4179
	pom1as1kin1as1 DMSO vs. W.T Cdc15 TRT	0.003706	0.003515	0.0001915	0.002429	113	124	0.1115	4179
	pom1as1kin1as1 Trt vs. shk1as2kin1as1 0 min	0.02748	0.005092	0.02238	0.003541	112	37	8.939	4179
	pom1as1kin1as1 Trt vs. shk1as2kin1as1 DMSO	0.02748	0.004722	0.02275	0.002479	112	115	12.98	4179
	pom1as1kin1as1 Trt vs. shk1as2kin1as1 Trt	0.02748	0.03016	-0.002689	0.002543	112	104	1.495	4179
	pom1as1kin1as1 Trt vs. kin1as1pck1as2 0 min	0.02748	0.001558	0.02592	0.003506	112	38	10.45	4179
	pom1as1kin1as1 Trt vs. kin1as1pck1as2 DMSO	0.02748	0.001723	0.02575	0.002479	112	115	14.69	4179
	pom1as1kin1as1 Trt vs. kin1as1pck1as2 Trt	0.02748	0.01739	0.01009	0.002496	112	112	5.717	4179
	pom1as1kin1as1 Trt vs. shk1as2pck1as2 0 min	0.02748	0.003261	0.02421	0.003379	112	42	10.13	4179
	pom1as1kin1as1 Trt vs. shk1as2pck1as2 DMSO	0.02748	0.003543	0.02393	0.002454	112	120	13.79	4179
	pom1as1kin1as1 Trt vs. shk1as2pck1as2 0 min	0.02748	0.01941	0.008061	0.002563	112	101	4.448	4179
	pom1as1kin1as1 Trt vs. pomkinshk DMSO	0.02748	0.005616	0.02186	0.002416	112	128	12.79	4179
	pom1as1kin1as1 Trt vs. pomkinshk Trt	0.02748	0.06269	-0.03522	0.002399	112	132	20.76	4179
	pom1as1kin1as1 Trt vs. pomshkpck DMSO	0.02748	0.004847	0.02263	0.002353	112	144	13.6	4179
	pom1as1kin1as1 Trt vs. pomshkpck TRT	0.02748	0.0414	-0.01392	0.002357	112	143	8.356	4179
	pom1as1kin1as1 Trt vs. pom kin pck DMSO	0.02748	0.003789	0.02369	0.002449	112	121	13.68	4179
	pom1as1kin1as1 Trt vs. pom kin pck TRT	0.02748	0.03748	-0.01	0.002435	112	124	5.811	4179
	pom1as1kin1as1 Trt vs. shk kin pck DMSO	0.02748	0.004694	0.02278	0.002371	112	139	13.59	4179
	pom1as1kin1as1 Trt vs. shk kin pck TRT	0.02748	0.03095	-0.00347	0.002474	112	116	1.984	4179
	pom1as1kin1as1 Trt vs. W.T Cdc15 DMSO	0.02748	0.002284	0.02519	0.002371	112	139	15.02	4179
	pom1as1kin1as1 Trt vs. W.T Cdc15 TRT	0.02748	0.003515	0.02396	0.002435	112	124	13.92	4179
	shk1as2kin1as1 0 min vs. shk1as2kin1as1 DMSO	0.005092	0.004722	0.0003707	0.00353	37	115	0.1485	4179
	shk1as2kin1as1 0 min vs. shk1as2kin1as1 Trt	0.005092	0.03016	-0.02507	0.003575	37	104	9.918	4179
	shk1as2kin1as1 0 min vs. kin1as1pck1as2 0 min	0.005092	0.001558	0.003535	0.004313	37	38	1.159	4179
	shk1as2kin1as1 0 min vs. kin1as1pck1as2 DMSO	0.005092	0.001723	0.00337	0.00353	37	115	1.35	4179
	shk1as2kin1as1 0 min vs. kin1as1pck1as2 Trt	0.005092	0.01739	-0.01229	0.003541	37	112	4.91	4179
	shk1as2kin1as1 0 min vs. shk1as2pck1as2 0 min	0.005092	0.003261	0.001831	0.004211	37	42	0.615	4179
	shk1as2kin1as1 0 min vs. shk1as2pck1as2 DMSO	0.005092	0.003543	0.001549	0.003512	37	120	0.6238	4179
	shk1as2kin1as1 0 min vs. shk1as2pck1as2 0 min	0.005092	0.01941	-0.01432	0.003589	37	101	5.644	4179
	shk1as2kin1as1 0 min vs. pomkinshk DMSO	0.005092	0.005616	-0.000524	0.003486	37	128	0.2126	4179
	shk1as2kin1as1 0 min vs. pomkinshk Trt	0.005092	0.06269	-0.0576	0.003474	37	132	23.45	4179
	shk1as2kin1as1 0 min vs. pomshkpck DMSO	0.005092	0.004847	0.0002459	0.003442	37	144	0.101	4179
	shk1as2kin1as1 0 min vs. pomshkpck TRT	0.005092	0.0414	-0.03631	0.003445	37	143	14.91	4179
	shk1as2kin1as1 0 min vs. pom kin pck DMSO	0.005092	0.003789	0.001304	0.003508	37	121	0.5256	4179
	shk1as2kin1as1 0 min vs. pom kin pck TRT	0.005092	0.03748	-0.03239	0.003499	37	124	13.09	4179
	shk1as2kin1as1 0 min vs. shk kin pck DMSO	0.005092	0.004694	0.0003987	0.003455	37	139	0.1632	4179
	shk1as2kin1as1 0 min vs. shk kin pck TRT	0.005092	0.03095	-0.02585	0.003526	37	116	10.37	4179
	shk1as2kin1as1 0 min vs. W.T Cdc15 DMSO	0.005092	0.002284	0.002809	0.003455	37	139	1.15	4179
	shk1as2kin1as1 0 min vs. W.T Cdc15 TRT	0.005092	0.003515	0.001578	0.003499	37	124	0.6377	4179
	shk1as2kin1as1 DMSO vs. shk1as2kin1as1 Trt	0.004722	0.03016	-0.02544	0.002527	115	104	14.24	4179
	shk1as2kin1as1 DMSO vs. kin1as1pck1as2 0 min	0.004722	0.001558	0.003164	0.003495	115	38	1.28	4179
	shk1as2kin1as1 DMSO vs. kin1as1pck1as2 DMSO	0.004722	0.001723	0.002999	0.002463	115	115	1.722	4179
	shk1as2kin1as1 DMSO vs. kin1as1pck1as2 Trt	0.004722	0.01739	-0.01267	0.002479	115	112	7.224	4179
	shk1as2kin1as1 DMSO vs. shk1as2pck1as2 0 min	0.004722	0.003261	0.001461	0.003367	115	42	0.6135	4179
	shk1as2kin1as1 DMSO vs. shk1as2pck1as2 DMSO	0.004722	0.003543	0.001178	0.002437	115	120	0.6839	4179
	shk1as2kin1as1 DMSO vs. shk1as2pck1as2 0 min	0.004722	0.01941	-0.01469	0.002547	115	101	8.159	4179
	shk1as2kin1as1 DMSO vs. pomkinshk DMSO	0.004722	0.005616	-0.0008947	0.0024	115	128	0.5273	4179
	shk1as2kin1as1 DMSO vs. pomkinshk Trt	0.004722	0.06269	-0.05797	0.002382	115	132	34.41	4179
	shk1as2kin1as1 DMSO vs. pomshkpck DMSO	0.004722	0.004847	-0.0001248	0.002336	115	144	0.07555	4179
	shk1as2kin1as1 DMSO vs. pomshkpck TRT	0.004722	0.0414	-0.03668	0.002339	115	143	22.17	4179
	shk1as2kin1as1 DMSO vs. pom kin pck DMSO	0.004722	0.003789	0.0009332	0.002432	115	121	0.5426	4179
	shk1as2kin1as1 DMSO vs. pom kin pck TRT	0.004722	0.03748	-0.03276	0.002418	115	124	19.16	4179
	shk1as2kin1as1 DMSO vs. shk kin pck DMSO	0.004722	0.004694	2.797e-05	0.002354	115	139	0.0168	4179
	shk1as2kin1as1 DMSO vs. shk kin pck TRT	0.004722	0.03095	-0.02622	0.002458	115	116	15.09	4179
	shk1as2kin1as1 DMSO vs. W.T Cdc15 DMSO	0.004722	0.002284	0.002438	0.002354	115	139	1.465	4179
	shk1as2kin1as1 DMSO vs. W.T Cdc15 TRT	0.004722	0.003515	0.001207	0.002418	115	124	0.706	4179
	shk1as2kin1as1 Trt vs. kin1as1pck1as2 0 min	0.03016	0.001558	0.02861	0.00354	104	38	11.43	4179
	shk1as2kin1as1 Trt vs. kin1as1pck1as2 DMSO	0.03016	0.001723	0.02844	0.002527	104	115	15.92	4179
	shk1as2kin1as1 Trt vs. kin1as1pck1as2 Trt	0.03016	0.01739	0.01278	0.002543	104	112	7.105	4179
	shk1as2kin1as1 Trt vs. shk1as2pck1as2 0 min	0.03016	0.003261	0.0269	0.003414	104	42	11.14	4179
	shk1as2kin1as1 Trt vs. shk1as2pck1as2 DMSO	0.03016	0.003543	0.02662	0.002502	104	120	15.05	4179
	shk1as2kin1as1 Trt vs. shk1as2pck1as2 0 min	0.03016	0.01941	0.01075	0.002609	104	101	5.827	4179
	shk1as2kin1as1 Trt vs. pomkinshk DMSO	0.03016	0.005616	0.02455	0.002466	104	128	14.08	4179
	shk1as2kin1as1 Trt vs. pomkinshk Trt	0.03016	0.06269	-0.03253	0.002449	104	132	18.79	4179
	shk1as2kin1as1 Trt vs. pomshkpck DMSO	0.03016	0.004847	0.02532	0.002403	104	144	14.9	4179
	shk1as2kin1as1 Trt vs. pomshkpck TRT	0.03016	0.0414	-0.01123	0.002407	104	143	6.601	4179
	shk1as2kin1as1 Trt vs. pom kin pck DMSO	0.03016	0.003789	0.02638	0.002497	104	121	14.94	4179
	shk1as2kin1as1 Trt vs. pom kin pck TRT	0.03016	0.03748	-0.007315	0.002483	104	124	4.166	4179
	shk1as2kin1as1 Trt vs. shk kin pck DMSO	0.03016	0.004694	0.02547	0.002421	104	139	14.88	4179
	shk1as2kin1as1 Trt vs. shk kin pck TRT	0.03016	0.03095	-0.0007813	0.002522	104	116	0.4381	4179
	shk1as2kin1as1 Trt vs. W.T Cdc15 DMSO	0.03016	0.002284	0.02788	0.002421	104	139	16.28	4179
	shk1as2kin1as1 Trt vs. W.T Cdc15 TRT	0.03016	0.003515	0.02665	0.002483	104	124	15.18	4179
	kin1as1pck1as2 0 min vs. kin1as1pck1as2 DMSO	0.001558	0.001723	-0.000165	0.003495	38	115	0.06678	4179
	kin1as1pck1as2 0 min vs. kin1as1pck1as2 Trt	0.001558	0.01739	-0.01583	0.003506	38	112	6.385	4179
	kin1as1pck1as2 0 min vs. shk1as2pck1as2 0 min	0.001558	0.003261	-0.001703	0.004181	38	42	0.5761	4179
	kin1as1pck1as2 0 min vs. shk1as2pck1as2 DMSO	0.001558	0.003543	-0.001985	0.003476	38	120	0.8077	4179
	kin1as1pck1as2 0 min vs. shk1as2pck1as2 0 min	0.001558	0.01941	-0.01786	0.003554	38	101	7.105	4179
	kin1as1pck1as2 0 min vs. pomkinshk DMSO	0.001558	0.005616	-0.004059	0.00345	38	128	1.664	4179
	kin1as1pck1as2 0 min vs. pomkinshk Trt	0.001558	0.06269	-0.06114	0.003438	38	132	25.15	4179
	kin1as1pck1as2 0 min vs. pomshkpck DMSO	0.001558	0.004847	-0.003289	0.003406	38	144	1.365	4179
	kin1as1pck1as2 0 min vs. pomshkpck TRT	0.001558	0.0414	-0.03984	0.003409	38	143	16.53	4179
	kin1as1pck1as2 0 min vs. pom kin pck DMSO	0.001558	0.003789	-0.002231	0.003473	38	121	0.9083	4179
	kin1as1pck1as2 0 min vs. pom kin pck TRT	0.001558	0.03748	-0.03592	0.003463	38	124	14.67	4179
	kin1as1pck1as2 0 min vs. shk kin pck DMSO	0.001558	0.004694	-0.003136	0.003419	38	139	1.297	4179
	kin1as1pck1as2 0 min vs. shk kin pck TRT	0.001558	0.03095	-0.02939	0.003491	38	116	11.91	4179
	kin1as1pck1as2 0 min vs. W.T Cdc15 DMSO	0.001558	0.002284	-0.0007256	0.003419	38	139	0.3002	4179
	kin1as1pck1as2 0 min vs. W.T Cdc15 TRT	0.001558	0.003515	-0.001957	0.003463	38	124	0.7992	4179
	kin1as1pck1as2 DMSO vs. kin1as1pck1as2 Trt	0.001723	0.01739	-0.01566	0.002479	115	112	8.935	4179
	kin1as1pck1as2 DMSO vs. shk1as2pck1as2 0 min	0.001723	0.003261	-0.001538	0.003367	115	42	0.6461	4179
	kin1as1pck1as2 DMSO vs. shk1as2pck1as2 DMSO	0.001723	0.003543	-0.00182	0.002437	115	120	1.056	4179
	kin1as1pck1as2 DMSO vs. shk1as2pck1as2 0 min	0.001723	0.01941	-0.01769	0.002547	115	101	9.824	4179
	kin1as1pck1as2 DMSO vs. pomkinshk DMSO	0.001723	0.005616	-0.003894	0.0024	115	128	2.295	4179
	kin1as1pck1as2 DMSO vs. pomkinshk Trt	0.001723	0.06269	-0.06097	0.002382	115	132	36.19	4179
	kin1as1pck1as2 DMSO vs. pomshkpck DMSO	0.001723	0.004847	-0.003124	0.002336	115	144	1.891	4179
	kin1as1pck1as2 DMSO vs. pomshkpck TRT	0.001723	0.0414	-0.03968	0.002339	115	143	23.99	4179
	kin1as1pck1as2 DMSO vs. pom kin pck DMSO	0.001723	0.003789	-0.002066	0.002432	115	121	1.201	4179
	kin1as1pck1as2 DMSO vs. pom kin pck TRT	0.001723	0.03748	-0.03576	0.002418	115	124	20.91	4179
	kin1as1pck1as2 DMSO vs. shk kin pck DMSO	0.001723	0.004694	-0.002971	0.002354	115	139	1.785	4179
	kin1as1pck1as2 DMSO vs. shk kin pck TRT	0.001723	0.03095	-0.02922	0.002458	115	116	16.82	4179
	kin1as1pck1as2 DMSO vs. W.T Cdc15 DMSO	0.001723	0.002284	-0.0005606	0.002354	115	139	0.3368	4179
	kin1as1pck1as2 DMSO vs. W.T Cdc15 TRT	0.001723	0.003515	-0.001792	0.002418	115	124	1.048	4179
	kin1as1pck1as2 Trt vs. shk1as2pck1as2 0 min	0.01739	0.003261	0.01413	0.003379	112	42	5.912	4179
	kin1as1pck1as2 Trt vs. shk1as2pck1as2 DMSO	0.01739	0.003543	0.01384	0.002454	112	120	7.979	4179
	kin1as1pck1as2 Trt vs. shk1as2pck1as2 0 min	0.01739	0.01941	-0.002028	0.002563	112	101	1.119	4179
	kin1as1pck1as2 Trt vs. pomkinshk DMSO	0.01739	0.005616	0.01177	0.002416	112	128	6.889	4179
	kin1as1pck1as2 Trt vs. pomkinshk Trt	0.01739	0.06269	-0.04531	0.002399	112	132	26.71	4179
	kin1as1pck1as2 Trt vs. pomshkpck DMSO	0.01739	0.004847	0.01254	0.002353	112	144	7.537	4179
	kin1as1pck1as2 Trt vs. pomshkpck TRT	0.01739	0.0414	-0.02401	0.002357	112	143	14.41	4179
	kin1as1pck1as2 Trt vs. pom kin pck DMSO	0.01739	0.003789	0.0136	0.002449	112	121	7.853	4179
	kin1as1pck1as2 Trt vs. pom kin pck TRT	0.01739	0.03748	-0.02009	0.002435	112	124	11.67	4179
	kin1as1pck1as2 Trt vs. shk kin pck DMSO	0.01739	0.004694	0.01269	0.002371	112	139	7.57	4179
	kin1as1pck1as2 Trt vs. shk kin pck TRT	0.01739	0.03095	-0.01356	0.002474	112	116	7.75	4179
	kin1as1pck1as2 Trt vs. W.T Cdc15 DMSO	0.01739	0.002284	0.0151	0.002371	112	139	9.007	4179
	kin1as1pck1as2 Trt vs. W.T Cdc15 TRT	0.01739	0.003515	0.01387	0.002435	112	124	8.058	4179
	shk1as2pck1as2 0 min vs. shk1as2pck1as2 DMSO	0.003261	0.003543	-0.0002821	0.003348	42	120	0.1192	4179
	shk1as2pck1as2 0 min vs. shk1as2pck1as2 0 min	0.003261	0.01941	-0.01615	0.003429	42	101	6.662	4179
	shk1as2pck1as2 0 min vs. pomkinshk DMSO	0.003261	0.005616	-0.002355	0.003321	42	128	1.003	4179
	shk1as2pck1as2 0 min vs. pomkinshk Trt	0.003261	0.06269	-0.05943	0.003309	42	132	25.4	4179
	shk1as2pck1as2 0 min vs. pomshkpck DMSO	0.003261	0.004847	-0.001585	0.003275	42	144	0.6846	4179
	shk1as2pck1as2 0 min vs. pomshkpck TRT	0.003261	0.0414	-0.03814	0.003278	42	143	16.45	4179
	shk1as2pck1as2 0 min vs. pom kin pck DMSO	0.003261	0.003789	-0.0005274	0.003345	42	121	0.223	4179
	shk1as2pck1as2 0 min vs. pom kin pck TRT	0.003261	0.03748	-0.03422	0.003334	42	124	14.51	4179
	shk1as2pck1as2 0 min vs. shk kin pck DMSO	0.003261	0.004694	-0.001433	0.003288	42	139	0.6161	4179
	shk1as2pck1as2 0 min vs. shk kin pck TRT	0.003261	0.03095	-0.02768	0.003363	42	116	11.64	4179
	shk1as2pck1as2 0 min vs. W.T Cdc15 DMSO	0.003261	0.002284	0.0009777	0.003288	42	139	0.4204	4179
	shk1as2pck1as2 0 min vs. W.T Cdc15 TRT	0.003261	0.003515	-0.0002536	0.003334	42	124	0.1076	4179
	shk1as2pck1as2 DMSO vs. shk1as2pck1as2 0 min	0.003543	0.01941	-0.01587	0.002522	120	101	8.9	4179
	shk1as2pck1as2 DMSO vs. pomkinshk DMSO	0.003543	0.005616	-0.002073	0.002373	120	128	1.235	4179
	shk1as2pck1as2 DMSO vs. pomkinshk Trt	0.003543	0.06269	-0.05915	0.002356	120	132	35.51	4179
	shk1as2pck1as2 DMSO vs. pomshkpck DMSO	0.003543	0.004847	-0.001303	0.002308	120	144	0.7984	4179
	shk1as2pck1as2 DMSO vs. pomshkpck TRT	0.003543	0.0414	-0.03786	0.002312	120	143	23.15	4179
	shk1as2pck1as2 DMSO vs. pom kin pck DMSO	0.003543	0.003789	-0.0002452	0.002406	120	121	0.1441	4179
	shk1as2pck1as2 DMSO vs. pom kin pck TRT	0.003543	0.03748	-0.03394	0.002392	120	124	20.07	4179
	shk1as2pck1as2 DMSO vs. shk kin pck DMSO	0.003543	0.004694	-0.001151	0.002327	120	139	0.6992	4179
	shk1as2pck1as2 DMSO vs. shk kin pck TRT	0.003543	0.03095	-0.0274	0.002432	120	116	15.94	4179
	shk1as2pck1as2 DMSO vs. W.T Cdc15 DMSO	0.003543	0.002284	0.00126	0.002327	120	139	0.7655	4179
	shk1as2pck1as2 DMSO vs. W.T Cdc15 TRT	0.003543	0.003515	2.848e-05	0.002392	120	124	0.01684	4179
	shk1as2pck1as2 0 min vs. pomkinshk DMSO	0.01941	0.005616	0.0138	0.002486	101	128	7.851	4179
	shk1as2pck1as2 0 min vs. pomkinshk Trt	0.01941	0.06269	-0.04328	0.002469	101	132	24.79	4179
	shk1as2pck1as2 0 min vs. pomshkpck DMSO	0.01941	0.004847	0.01457	0.002424	101	144	8.499	4179
	shk1as2pck1as2 0 min vs. pomshkpck TRT	0.01941	0.0414	-0.02198	0.002427	101	143	12.81	4179
	shk1as2pck1as2 0 min vs. pom kin pck DMSO	0.01941	0.003789	0.01563	0.002517	101	121	8.779	4179
	shk1as2pck1as2 0 min vs. pom kin pck TRT	0.01941	0.03748	-0.01806	0.002503	101	124	10.21	4179
	shk1as2pck1as2 0 min vs. shk kin pck DMSO	0.01941	0.004694	0.01472	0.002442	101	139	8.526	4179
	shk1as2pck1as2 0 min vs. shk kin pck TRT	0.01941	0.03095	-0.01153	0.002542	101	116	6.416	4179
	shk1as2pck1as2 0 min vs. W.T Cdc15 DMSO	0.01941	0.002284	0.01713	0.002442	101	139	9.921	4179
	shk1as2pck1as2 0 min vs. W.T Cdc15 TRT	0.01941	0.003515	0.0159	0.002503	101	124	8.983	4179
	pomkinshk DMSO vs. pomkinshk Trt	0.005616	0.06269	-0.05708	0.002317	128	132	34.84	4179
	pomkinshk DMSO vs. pomshkpck DMSO	0.005616	0.004847	0.0007699	0.002269	128	144	0.4799	4179
	pomkinshk DMSO vs. pomshkpck TRT	0.005616	0.0414	-0.03578	0.002272	128	143	22.27	4179
	pomkinshk DMSO vs. pom kin pck DMSO	0.005616	0.003789	0.001828	0.002368	128	121	1.092	4179
	pomkinshk DMSO vs. pom kin pck TRT	0.005616	0.03748	-0.03186	0.002353	128	124	19.15	4179
	pomkinshk DMSO vs. shk kin pck DMSO	0.005616	0.004694	0.0009227	0.002288	128	139	0.5703	4179
	pomkinshk DMSO vs. shk kin pck TRT	0.005616	0.03095	-0.02533	0.002394	128	116	14.96	4179
	pomkinshk DMSO vs. W.T Cdc15 DMSO	0.005616	0.002284	0.003333	0.002288	128	139	2.06	4179
	pomkinshk DMSO vs. W.T Cdc15 TRT	0.005616	0.003515	0.002102	0.002353	128	124	1.263	4179
	pomkinshk Trt vs. pomshkpck DMSO	0.06269	0.004847	0.05785	0.00225	132	144	36.35	4179
	pomkinshk Trt vs. pomshkpck TRT	0.06269	0.0414	0.0213	0.002254	132	143	13.36	4179
	pomkinshk Trt vs. pom kin pck DMSO	0.06269	0.003789	0.05891	0.002351	132	121	35.44	4179
	pomkinshk Trt vs. pom kin pck TRT	0.06269	0.03748	0.02521	0.002336	132	124	15.27	4179
	pomkinshk Trt vs. shk kin pck DMSO	0.06269	0.004694	0.058	0.00227	132	139	36.14	4179
	pomkinshk Trt vs. shk kin pck TRT	0.06269	0.03095	0.03175	0.002377	132	116	18.89	4179
	pomkinshk Trt vs. W.T Cdc15 DMSO	0.06269	0.002284	0.06041	0.00227	132	139	37.64	4179
	pomkinshk Trt vs. W.T Cdc15 TRT	0.06269	0.003515	0.05918	0.002336	132	124	35.83	4179
	pomshkpck DMSO vs. pomshkpck TRT	0.004847	0.0414	-0.03655	0.002205	144	143	23.45	4179
	pomshkpck DMSO vs. pom kin pck DMSO	0.004847	0.003789	0.001058	0.002303	144	121	0.6496	4179
	pomshkpck DMSO vs. pom kin pck TRT	0.004847	0.03748	-0.03263	0.002288	144	124	20.17	4179
	pomshkpck DMSO vs. shk kin pck DMSO	0.004847	0.004694	0.0001528	0.002221	144	139	0.09728	4179
	pomshkpck DMSO vs. shk kin pck TRT	0.004847	0.03095	-0.0261	0.00233	144	116	15.84	4179
	pomshkpck DMSO vs. W.T Cdc15 DMSO	0.004847	0.002284	0.002563	0.002221	144	139	1.632	4179
	pomshkpck DMSO vs. W.T Cdc15 TRT	0.004847	0.003515	0.001332	0.002288	144	124	0.8231	4179
	pomshkpck TRT vs. pom kin pck DMSO	0.0414	0.003789	0.03761	0.002307	143	121	23.06	4179
	pomshkpck TRT vs. pom kin pck TRT	0.0414	0.03748	0.00392	0.002292	143	124	2.419	4179
	pomshkpck TRT vs. shk kin pck DMSO	0.0414	0.004694	0.03671	0.002225	143	139	23.34	4179
	pomshkpck TRT vs. shk kin pck TRT	0.0414	0.03095	0.01045	0.002334	143	116	6.335	4179
	pomshkpck TRT vs. W.T Cdc15 DMSO	0.0414	0.002284	0.03912	0.002225	143	139	24.87	4179
	pomshkpck TRT vs. W.T Cdc15 TRT	0.0414	0.003515	0.03788	0.002292	143	124	23.38	4179
	pom kin pck DMSO vs. pom kin pck TRT	0.003789	0.03748	-0.03369	0.002387	121	124	19.96	4179
	pom kin pck DMSO vs. shk kin pck DMSO	0.003789	0.004694	-0.0009053	0.002322	121	139	0.5513	4179
	pom kin pck DMSO vs. shk kin pck TRT	0.003789	0.03095	-0.02716	0.002427	121	116	15.83	4179
	pom kin pck DMSO vs. W.T Cdc15 DMSO	0.003789	0.002284	0.001505	0.002322	121	139	0.9166	4179
	pom kin pck DMSO vs. W.T Cdc15 TRT	0.003789	0.003515	0.0002737	0.002387	121	124	0.1622	4179
	pom kin pck TRT vs. shk kin pck DMSO	0.03748	0.004694	0.03279	0.002307	124	139	20.1	4179
	pom kin pck TRT vs. shk kin pck TRT	0.03748	0.03095	0.006534	0.002412	124	116	3.83	4179
	pom kin pck TRT vs. W.T Cdc15 DMSO	0.03748	0.002284	0.0352	0.002307	124	139	21.58	4179
	pom kin pck TRT vs. W.T Cdc15 TRT	0.03748	0.003515	0.03396	0.002372	124	124	20.25	4179
	shk kin pck DMSO vs. shk kin pck TRT	0.004694	0.03095	-0.02625	0.002349	139	116	15.81	4179
	shk kin pck DMSO vs. W.T Cdc15 DMSO	0.004694	0.002284	0.00241	0.00224	139	139	1.522	4179
	shk kin pck DMSO vs. W.T Cdc15 TRT	0.004694	0.003515	0.001179	0.002307	139	124	0.7227	4179
	shk kin pck TRT vs. W.T Cdc15 DMSO	0.03095	0.002284	0.02866	0.002349	116	139	17.26	4179
	shk kin pck TRT vs. W.T Cdc15 TRT	0.03095	0.003515	0.02743	0.002412	116	124	16.08	4179
	W.T Cdc15 DMSO vs. W.T Cdc15 TRT	0.002284	0.003515	-0.001231	0.002307	139	124	0.7548	4179

## Sheet: Single-as-mutant
				mNG-Cdc15 Pom1-as1 (3 Replicate)					mNG-Cdc15 Shk1-as2					mNG-Cdc15 Kin1-as1					mNG-Cdc15 Pck1-as2
				0 min (No Treatment)	15 min (DMSO)	15 min (3MB-PP1)			0 min (No Treatment)	15 min (DMSO)	15 min (3BrB-PP1)			0 min (No Treatment)	15 min (DMSO)	15 min (3MB-PP1)			0 min (No Treatment)	15 min (DMSO)	15 min (3MB-PP1+ 3BrB-PP1)
				0.0348776	0.000173275	0.0183514			0.000180583	0.0176925	0.0208585			0	0.0198637	0.0447106			0.00115275	0.000222873	0.0493784
				0.00641309	0.00147015	0.0639778			0	0.0984676	0.0314502			0.00141518	0.00833851	0.00169325			0.00102478	0.00095405	0.000581189
				0.00729156	0.00279829	0.0132586			0	0.00486945	0.0140427			0	0.00432518	0.00760835			0.00297899	0.00134874	0.00015102
				0.000132235	0.00132107	0.0198276			0.000146677	0.00159932	0.0820548			0	0.00332113	0.0069167			0.00370845	0.00033324	0.00315791
				0.000299487	0.00172567	0.0490797			0.00123637	0.00221272	0.0160273			0	0	0.02984			0.000625421	0.000205008	0.0152827
				0.00194084	0.00135995	0.0119226			0.00258317	0.000888964	0.0101123			0.000185172	0.000885425	0.0209307			0	0.000956482	0.0105339
				0.000466736	0.00236302	0.0221335			0	0.000228227	0.00650643			0	0.00177707	0.0195985			0.000880928	0	0.000165146
				0	0.000794122	0.0128144			0	0.00570988	0.0133121			0.000351729	0.00220584	0.00320138			0.000250519	0.0026354	0
				0.00206154	0.000884126	0.0270405			0	0.00647422	0.0215619			0.000352267	0.000707416	0.00267284			0	0.00384248	0.00364155
				0	0.00235088	0.0105475			0	0.00238973	0.0129194			0.000361417	0.0036552	0.00846629			0.000106554	0.00589811	0.00452954
				0	0.000315704	0.0112619			0.0172613	0.00125532	0.012121			0	0.00187432	0.00141473			0.000900994	0.00146389	0.00573944
				0.000890443	0.000662712	0.00811565			0.00820811	0	0.0281508			0	0.00465875	0.0236213			0.00106438	0.000553011	0.0323656
				0.00242836	0.000104413	0.0105066			0.00538103	0	0.0213932			0	0.00458187	0.0596792			0.00116008	0.000447316	0.00886727
				0.000104979	0.000344902	0.0130003			0	0.00505054	0.0119791			0	0	0.00131273			0.00454029	0.000229818	0.00388761
				0.00198803	0.000783729	0.030108			0.000250145	0.00300934	0.0242248			0	0.000139557	0.0492286			0.00836946	0.000918344	0.000704021
				0.000291939	0.000142113	0.0176194			0	0.000690128	0.0309185			0	0.0002922	0.0017551			0	0.00142732	0.00204235
				0.00100769	0.000594562	0.00952263			0.0024661	0.00153778	0.00503338			0.000664676	0.00223811	0.0116629			0.000412883	0.000892045	0.00382496
				0.00974368	0.0012006	0.0167413			0.00122814	0.00487305	0.00866904			0.000607884	0.000860604	0.00156275			0.00073719	9.9806e-05	0.00939629
				0.00303924	0.000364011	0.0256502			0.00189196	0.00140315	0.0133769			0	0.00108184	0.0564826			0.0016376	0.000554366	0.0166768
				0.00367009	0.000747045	0.00515621			0.000686794	0.00242619	0.0207659			8.65235e-05	0.00214528	0.00360831			0.000128879	0	0.00230445
				0.000990264	0	0.0306153			0.000861954	0.00126317	0.0073003			0.000639753	0.000285852	0.00141251			0.000143514	0	0.00426313
				0	0.000475107	0.0498483			0.00278509	0.000255237	0.00816101			0	0.000786055	0.00120828			0.000214556	0	0.000476808
				0.000331112	0	0.0885454			0.000998722	0.00281314	0.011852			0.000557922	0.00207932	0.00254047			0	0.005212	0.00596452
				0.00278501	0.000529231	0.0491757			0	0.00962013	0.0561125			0.000287942	0.000323944	0.00314804			0.000414479	0.00207886	0.00134682
				0.00114985	0.000393274	0.0144367			0.000407129	0.00504346	0.0505178			0.00044844	0.000822816	0.00289332			0.000251656	0.000525668	0.000108279
				0.00114985	0.00134178	0.0124659			0.00237505	0.00050501	0.00985561			0.00109321	0	0.00154377			0.000436397	0	0.000430456
				0.00109824	0.000516373	0.0249157			0.000623561	0.00190305	0.0260182			0.00024153	0.00123025	0.00111895			0.000850339	0.0020353	0.000166054
				0.00332559	0.00136134	0.0467444			0.00153049	0.00248586	0.0155093			0.000140202	0.00299067	0.00296393			0.000697481	0.000202234	0.000612229
				0.00199066	0	0.0605724			0.000123568	0.00231548	0.0427076			0.000552766	0.000597416	0.00509897			0.000889393	0	0.00460921
				0.0134071	0.000477291	0.0872711			0.00122609	0.00349838	0.0109183			0.00150866	0.00034995	0.0026525			0.000436344	0.00129314	0.0500295
				0.00515601	0	0.0570671			0.00176767	0.00827757	0.00902925			0.000657605	0.000306163	0.00389683			0.00380539	0.00371277	0.0147126
				0.0336969	0.000269066	0.0177143			0.000443047	0.00419653	0.0100523			0.00302408	0.000133465	0.00153622			0.000445431	0.000859921	0.0347396
				0.00176239	0.00296051	0.0638295			0.000768771	0.00296454	0.043494			0.000454833	0.000351435	0.0034945			0.00147	0.000289064	0.00157854
				0.00252129	0	0.013945			0.000245923	0.00338341	0.00840686			0.00118967	0.00168805	0.00668065			0.00013793	0	0.00102156
				0.000600677	0.000137604	0.0321174			0.00131066	0.003551	0.0254167			0.000343155	0	0.0171435			0.00181763	0.00235553	0
				0.00270591	0.000137604	0.0120341			0.00714201	0.00840686	0.0111994			0	0.00517248	0.0192544			0.00187748	0.00136236	0.00431396
				0	0.00270317	0.00437667			0.00160165	0.0254167	0.0730265			0.00233212	0.00281514	0.00659766			0.000186466	0.00258449	0.0102427
				0	0.00218662	0.0400585			0.00751745	0.0111994	0.0188601			0.00501288	0.00132303	0.00452022			0.00140944	0.0013548	0
				0.00168413	0.00504831	0.0614698			0.0154276	0.00699959	0.0123949			0.000119792	0.000609295	0.00549668			0.00181363	0.00189602	0.00104164
				0.00273594	0.00394315	0.0076447			0.0164592	0.00252988	0.0855573			0.000468811	0.000665759	0.00970426			0.00300751	0.00183918	0.000955286
				0.00183988	0.00271374	0.0524055			0.0149808	0.00707223	0.0299732			0.00200945	0.00077502	0.0345383			0.000317897	0.000378601	0.00146672
				0.000568068	0.00176222	0.0302296			0.0106164	0.00100328	0.00396822			0.000541552	0.00164639	0.00848255			0.000675537	0.00260411	0.00368185
					0.00105045	0.00900422			0.0137087	0.000318747	0.00707388			0.000260506	0.00244513	0.00236354			0.000994148	0.00218802	0.00350989
					0.000257898	0.0679338			0.0246638	0.00321754	0.00933136			0.000564325	0.00128764	0.00665087			0.0022319	0.000407443	0.0129596
					0.002346	0.00756237			0.0092231	0.00143841	0.0695363				0.000919734	0.00554377			0.00111664	0	0.0090813
					0.00157183	0.0172187			0.013564	0.00074673	0.0102838				0.000269038	0.00407886			0	0	0.00276208
					0.00559773	0.00621813			0.0280412	0.00260118	0.00442024				0.000230095	0.012762			0.000127397	0.00205563	0.00618009
					0.00348014	0.0103745			0.0172484	0.0127393	0.0878296				0.00082571	0.00524601			0.000347076	0.000484902	0.00635019
					0.000959953	0.0179299			0.0121458	0.00147944	0.00823899				0.00178874	0.00853671			0.00148891	0.000987877	0.00591362
					0.000239479	0.00381333			0.00524707	0.00336945	0.0131131				0.000882214	0.0126127			0.0110971	0.00138991	0.000965178
					0	0.00314253			0.0167558	0.00096305	0.00639988				0.000212427	0.00529462			0.000472477	0.000848574	0.0180047
					0.000409026	0.00461495			0.00035746	0.00449037	0.0181822				0.000473173	0.00513053			0.000151236	0.000155139	0.018954
					0.00160183	0.0426977			0.0139167	0.00293385	0.00828375				0.000158233	0.0078096			0.000658469	0	0.0117461
					0.00039054	0.0106992			0.00229405	0.0014863	0.0161462				0.000391959	0.0146254			0	0.000390433	0.00271933
					0.00406818	0.00320695			0.0019211	0.0020427	0.0044969				0.00596341	0.0209862			0.000279792	0.00166321	0.00611769
					0.00795908	0.0107743			0.00318445	0.0064016	0.0063007				0.000541361	0.0343629			0.000338182	0.0020606	0.000657844
					0.00308113	0.00469384			0.00810668	0.00222216	0.0135052				0.000160654	0.0156695			0	0.000930763	0.000876702
					0.00348388	0.00386037			0.00654064	0.00495886	0.00453393				0.000490656	0.00639197			0	0.000289387	0.0103855
					0.00837998	0.0741964			0.00468294	0	0.00760188				0.000155965	0.00699359			0.000673849	0.00104107	0.000158782
					0.00483937	0.0753564			0.00258679	0.00199983	0.00670326				0.00118205	0.00698635			0.000181319	0.00629719	0.0103131
					0.00152534	0.0243729			0.0173711	0	0.0128258				0	0.0128458			0.00468466	0.0038045	0.0159999
					0.000886096	0.038271			0.0029163	0.000921986	0.0199129				0	0.0102189			0.000620951	0.00382911	0.000289119
					0.000133465	0.0457416			0.000241267	0.00205556	0.0148954				0.000130726	0.00782167			0	0.00332331	0.000529315
					0.000351435	0.00757007			0.003541	0.000261732	0.01133				0.000410603	0.00848667			0.00259483	0.00123867	0.000235882
					0.00168805	0.032456			0.00302267	0.00148923	0.0137727				0	0.0182293			0.000296739	0.000760776	0.000110264
					0.00034995	0.0303884			0.00177071	0.00791573	0.0101983				0.00351467	0.0110847			0.000760867	0.000649551	0.000231029
					0.000306163	0.0497904			0.0036688	0.0220216	0.0192749				0.000911017	0.00668065			0.000181986	0	0.000689617
					0.000597416	0.0132658			0.000196512	0.00363322	0.0186813				0.000230837	0.0171435			0.000205352	0.000927992	0.00118807
					0.00123025	0.01962			0.00107471	0.00352995	0.0354857				0.00353737	0.0192544			0	0.00266843	0.000307564
					0.00299067	0.0154656			0.00528798	0.0107206	0.0108933				0.00109097	0.00659766				0.00281436	0.000968041
					0.000264948	0.00772915			0.00860029	0.0185508	0.0207925				0.00199743	0.00452022				0.00176051	0.0192601
					0.00046735	0.0337274			0.0132952	0.000339109	0.0186401				0.000427212	0.00549668				0.00162972	0.0170547
					0.00170524	0.0435643			0.00447565	0.0063705	0.0181483				0	0.00970426				0.00105899	0.000841962
					0.0108291	0.0123631			0.0014343	0.00994576	0.0156039				0.00103879	0.0345383				0.00248462	0.000940688
					0.0156872	0.0141159			0.00813118	0.00169738	0.0213609				0.00192085	0.00848255				0.00080139	0.00386034
					0.00752147	0.0384368			0.000140053	0.00122394	0.0127287				0	0.00236354				0.00476798	0.00368266
					0.00593526	0.00460097			0.00111352	0.00293946	0.0100563				0.00106749	0.00665087				0.00169009	0.00103467
					0.00178849	0.00618641			0.00120309	0.003353	0.0116781				0.000680418	0.00554377				0.00693694	0.00044642
					0.00140973	0.0149699			0.000955755	0.0208749	0.011278				0.00342144	0.00407886				0.00190999	0.000545192
					0.00167942	0.0351903			0.00101185	0.00195722	0.0144537				0	0.012762				0.00107737	0.00121256
					0.00075063	0.0158945			0.000400017	0.00401613	0.0179361				0	0.00524601				0.00209485	0.00531203
					0.0014276	0.0358327			0.00441156	0.00205556	0.0174777				0.00203896	0.00853671				0.00481101	0.00229689
					0.00730678	0.0274102			0.00306057	0.0198614	0.0136472				0.000609295	0.0126127				0.00102153	0.00056717
					0.00182204	0.0118931			0.00524817	0.000357447	0.0160142				0.000665759	0.00529462				0	0.016772
					0.00277008	0.0536211			0.00171825	0.00576465	0.019966				0.00077502	0.00513053				0.000713017	0.00119258
					0.00109592	0.0113403			0.00287711	0.0213812	0.0239406				0.00164639	0.0078096				0.000997648	0.000493818
					0.00380184	0.0469514			0.00336399	0.0152614	0.0190243				0.00244513	0.0146254				0.000458096	0.00467153
					0.00800497	0.0468043			0.0185774	0.00502193	0.00772141				0.00128764	0.0209862				0.00038495	0.029615
					0.00430876	0.0232565			0.000531884	0.00914459	0.0068639				0.000919734	0.0343629				0.000336646	0.010685
					0.00231772	0.0117621			0.000408379	0.00396884	0.00836514				0.000269038	0.0156695				0.00154828	0.000955311
					0.00125165	0.0205566			0.0010874	0.00680026	0.00715413				0.000230095	0.00639197				0.00105989	0.0100806
					0.00103459	0.0246028			7.17174e-05	0.00966678	0.0437406				0.00082571	0.00699359				0.00186191	0.00786934
					0.00171118	0.0305988			0.00116975	0.010249	0.0182024				0.00178874	0.00698635				0.000383228	0.000110619
					0.00430222	0.0137524			0.00697342	0.00165706	0.0397277				0.000882214	0.0128458				0	0.00069614
					0.00627593	0.0143495			0.00673273	0.006587	0.0199401				0.000212427	0.0102189				0.000167386	0.000354602
					0.00134785	0.0236175			0.00692275	0	0.0241115				0.000473173	0.00782167				0.000365965	0.000417425
					0.00173933	0.00488299			0.0255149	0.00943681	0.0194793				0.000158233	0.00848667				0.00019147	0.000383468
					0.000800677				0.00187106	0.000572173	0.0238031				0.000391959	0.0182293				0.000235748	0.0215898
					0.00635299				0.0025276	0.00247017	0.0730265				0.00596341	0.0110847				0.000217189	0.000177893
					0.00171546				0.0013698	0.00441305	0.0188601				0.000541361					0.000520095	0.000114517
					0.00104764				0.00560681	0.00343806	0.0123949				0.000160654					0.000232077	0.000580782
					0.00104806				0.00957929	0.00279923	0.0855573				0.000490656					0.000807204	0.00141885
					0.00182207				0.0120784	0.00285111	0.000568007				0.000155965					0.00155526	0.00212264
					0.0012737				0.00965848	0.000977675	0.0033233				0.00118205					0.000756215	0.00167875
					0.00303139				0.000231096	0.00812207	0.0299732				0					0.000376887	0.000878035
					0.00111274				0.00616078	0.00220806	0.00396822				0					9.56091e-05	0
					0.00113955				0.00531415	0.000995837	0.00333079				0.000130726					0.000126348	0
					0.00336581				0.00236009	0.00496105	0.000355421				0.000410603					0.000441276	0.000316032
					0.00253606				0	0.0046761	0.00707388				0					0.000172601	0.00532913
					0.00438062				0.000179839	0.00699959	0.00199828				0.00351467					0.000764805	0.000605812
									0.00914269	0.00252988	0.000236546				0.000911017					0.000500401	0.00199965
									0.00570308	0.00707223	0.00933136				0.000230837					0.000521489	0.00018861
									0.000977705	0.00100328	0.0695363				0.00353737					0.00015835	0.000732812
									0.000347017	0.000318747	0.0102838				0.00109097					0.00188243	0
									0.00316633	0.00321754	0.00442024				0.00199743					0.000378094	0.000633936
									0.00264217	0.00143841	0.0878296				0.000427212					0	0
									0.00794495	0.00074673	0.00823899				0					0.000877259	0.000215765
									0.0020137	0.00260118	0.0131131				0.00103879					0.000483988	0.000120084
									0.00243199	0.0127393	0.00639988				0.00192085					0	0.000213601
										0.00147944	0.0181822				0					0.000178692
										0.00336945	0.00828375				0.00106749					0.0041759
										0.00096305	0.0161462				0.000680418
										0.00449037	0.0044969				0.00342144
										0.00293385	0.0063007				0
										0.0014863	0.0135052				0
										0.0020427	0.00197307				0.00203896
										0.0064016	0.00453393
										0.00222216	0.00760188
										0.00495886	0.00670326
										0	0.00329956
										0.00199983	0.0128258
										0	0.0199129
										0.000921986	0.0148954
										0.00205556	0.01133
										0.000261732	0.00358279
										0.00148923	0.00395796
										0.00791573	0.00354523
										0.0220216	0.0137727
										0.00363322	0.0101983
										0.00352995
										0.0107206
										0.0185508
										0.000339109
										0.0063705
										0.00994576
										0.00169738
										0.00122394
										0.00293946

## Sheet: Double-as-mutant
	mNG-Cdc15 Pom1-as1 Shk1-as2 (THREE REPLICATE)				mNG-Cdc15 kin1as1 shk1as2				mNG-Cdc15 kin1as1 pck1as2					mNG-Cdc15 shk1as2 pck1as2				mNG-Cdc15 Pom1-as1 Pck1-as2					mNG-Cdc15 Pom1-as1 kin1as1
	0 min (No Treatment)	15 min (DMSO)	15 min (3MB-PP1+ 3BrB-PP1)		0 min (No Treatment)	15 min (DMSO)	15 min treatment		0 min (No Treatment)	15 min (DMSO)	15 min treatment			0 min (No Treatment)	15 min (DMSO)	15 min treatment		0 min (No Treatment)	15 min (DMSO)	15 min (3MB-PP1+ 3BrB-PP1)			0 min (No Treatment)	15 min (DMSO)	15 min (3MB-PP1)
	0.00487997	0.00942535	0.0783723		0.000860884	0.0038908	0.0560711		0.000157941	0	0.0369764			0.00018152	0.000838504	0.0389932		0.00186477	0.00367426	0.014872			0.00179616	0.00279319	0.0335675
	0.0127712	0.00580122	0.0543674		0	0.00958715	0.10177		0.00511567	0.000429634	0.00873354			0.000800602	0.000420597	0.00331043		0.000542095	0.0189485	0.0175756			0.00162698	0.00930151	0.00920928
	0.00798084	0.00633823	0.0971125		0.000883181	0.00865396	0.0410606		0.0127305	0.00172129	0.00466512			0.00179395	0.00191176	0.0622938		0.00636314	0.00170532	0.0159084			0.000198219	0.000232335	0.0291981
	0.0149541	0.00869694	0.0944063		0.0134141	0.0023106	0.000224742		0.000711176	9.23552e-05	0.049877			0.000204112	0.00164084	0.00477234		0.000716679	0.000768414	0.042643			0.000195652	0.00370451	0.101271
	0.000538368	0.0045924	0.0435564		0.00128029	0.00182734	0.0471624		0.00259718	0.00124707	0.0118854			0.000117795	0.00433568	0.00424808		0.00316807	0.00027962	0.0104315			0.000316345	0.00119106	0.0198927
	0.00111892	0.000312276	0.0537226		0.000802924	0.000869865	0.0694392		0	8.4636e-05	0.0156777			0.0021547	0.000701597	0.00406819		0.00145957	0.00265976	0.0771977			0.000500977	0.00156512	0.0457913
	0.00729607	0.00233334	0.00738724		0.00295301	0.0190658	0.000392594		0.000226178	0.000682173	0.0402384			0.00020688	0.00654652	0.0155002		0.00537775	0.000508213	0.0468663			0	0.00320307	0.00458352
	0.00458948	0.00391169	0.00592778		0.00829826	0.0220887	0.117738		0	0	0.0196061			0.00730621	0.00205731	0.00750288		0.0129258	0.00149321	0.0437504			0	0.00324137	0.00570772
	0.00154487	0.0303184	0.0144244		0	0.00639926	0.00168824		0	0.00228965	0.0242108			0.00126054	0.00163565	0.0336268		0.000844828	0.00564727	0.0454138			0.00280682	0.000492752	0.0356756
	0.00137823	0.0430662	0.041052		0.00339918	0.00425481	0.0518779		0.00118252	0.000630216	0.00780496			0.00048211	0.00121427	0.0126347		0.0022668	0.00137632	0.0325126			0.000111887	0.011459	0.0550284
	0.00759851	0.0108459	0.00505728		0.00831479	0.000991338	0.049512		0.000209413	0.00108399	0.0419818			0.00364431	0.00272519	0.106107		0.000533364	0.0271019	0.0254535			0.00323318	0.00479897	0.0326091
	0.0119703	0.00210923	0.0167914		0.00381156	0.0151241	0.0461873		0.000434168	0.000117658	0.0598412			0.00195635	0.00578453	0.00255243		0.00262677	0.00419165	0.00960408			0.000171476	0.00503428	0.153655
	0.00112116	0.00501458	0.0916504		0.00183975	0.000556096	0.0187604		0.000341824	0.00115368	0.0338762			0.00104306	0.00986236	0.00860584		0.00111751	0.00256917	0.0161943			0.000648448	0.000193945	0.0037095
	0.00536611	0.0140068	0.0570235		0.0206488	0.0119683	0.0577098		0	0.00063156	0.00804501			0.0013329	0.0123614	0.0439612		0.00283955	0.000861089	0.0287721			0.000478259	0.0047495	0.0161603
	0.00106356	0.001231	0.0463046		0.000815249	0.000575617	0.0359506		0.000155877	0.00032689	0.0354949			0.000453048	0.0112803	0.00461891		0.0089696	0.000174176	0.0479122			0.00991583	0	0.0530822
	0.00311987	0.00585545	0.00245124		0.00475246	0	0.0195012		9.78191e-05	0.000415128	0.00270057			0.0026945	0.00288349	0.00542856		0.0002924	0.000239179	0.00557135			0.000148761	0.00122726	0.0262007
	0.00272251	0.0153772	0.109587		0.00726949	0.00249485	0.00415384		0.00145335	0	0.0175256			0.00200096	0.005067	0.00278172		0.00186481	0.00063194	0.000406344			0.0225626	0.000635004	0.00523497
	0.00680117	0.000664778	0.145218		0.00117809	0.00302586	0.0235857		0.000136953	0	0.00997745			0.0198387	0.024859	0.00244257		0.000301049	0.00224364	0.00495639			0.00168088	0.00387661	0.00542726
	0.000391572	0.0065286	0.143006		0.00041557	0.00549576	0.0162626		0.000506925	0	0.0771453			0.00770491	0.00115341	0.00446421		0.00422755	0.00206427	0.0569872			0.00344612	0.000523173	0.0476452
	0.0101795	0.00317169	0.163365		0.00182521	0.00745093	0.0200149		0.000120661	0.000329045	0.0165084			0.00141991	0.000260383	0.00319977		0.000621982	0.00665793	0.0776695			0.000553987	0.000290981	0.00238562
	0.000675143	0.0168142	0.140166		0.0016661	0.00358074	0.0007467		9.61607e-05	0.000251004	0.0182559			0.00286427	0.000638687	0.00271711		0.00148996	0.000528293	0.0576838			0.000698334	0.00230422	0.0157786
	0.00753101	0	0.163922		0.0018068	0.0089818	0.0535191		0.000474568	0.00195382	0.0120077			0.000227512	0.000719948	0.00368167		0.00296469	0.00308986	0.0332542			0.00363434	0.0019313	0.00970793
	0.0040764	0.00887605	0.204719		0.000229282	0.0152974	0.0634063		0.000148595	0	0.0122771			0.00171786	0.000418617	0.00959751		0.00386519	0.00745687	0.0637488			0	0.00940924	0.0191655
	0.00196908	0.00584363	0.00596127		0	0.00510058	0.0110436		0.000466913	0.000517373	0.00225498			0.00225409	0.00261394	0.0374757		0.00107081	0.00954444	0.0236127			0.00130987	0.00178239	0.0108407
	0.000663301	0.0127242	0.178766		0	0.00261277	0.0338637		0.000155494	0.002428	0.0206421			0.00192911	0.0357798	0.00953487		0.00616098	0.000980374	0.049832			0.000313339	0.00143515	0.00416991
	0.000521994	0.00244569	0.00171273		0.00928311	0.00143576	0.0589575		0	0.000254702	0.00269476			0.00162805	0.00562775	0.0315071		0.00462253	0.00794967	0.0260589			0.000686477	0.00149391	0.0152387
	0.00177253	0.0105611	0.131409		0.00034006	0.00969947	0.00579024		0	0.00029147	0.00721341			0.00386434	0.00759573	0.00924517		0.0219284	0.00242944	0.0310818			0	0.000559973	0.00620776
	0.00257927	0.00626782	0.000843445		0.0122854	0.012956	0.141474		0.00372822	0.000654049	0.00278185			0.00452144	0.00389751	0.00857398		0.0157244	0.000100929	0.0732072			0.0032903	0.00148431	0.0121459
	0.00167189	0.00357023	0.00506145		0.00319941	0.0102053	0.0653053		0.00011368	0.000693992	0.0100254			0.00108592	0.00549548	0.0104053		0.0269999	0	0.0330623			0.00434473	0.00530729	0.0116689
	0.00516862	0.00329829	0.00248635		0.00467926	0.0157761	0.0295389		0.00645527	0	0.00309425			0.00195842	0.00133912	0.0379736		0.00227061	0.00102971	0.0119077			0.00126599	0.00992815	0.0133971
	0.01796	0.00183798	0.00224147		0.00447596	0.0121734	0.00393851		0.00134157	0.000931587	0.0112973			0.0182001	0.0150559	0.00997431		0.00440219	0.00291828	0.0500233			0.000152131	0.00188457	0.0063848
	0.0020955	0.00234111	0.145508		0.000469407	0.00507688	0.0125143		0.000185276	0.000319223	0.00591423			0.010223	0.00317344	0.0327751		0.0244427	0.0015315	0.040413			0.0012726	0.00310894	0.07293
	0.00456307	0.000871537	0.0113272		0.00170435	0.00686552	0.00448896		0.00378506	0	0.00852415			0.00331221	0.00147053	0.00785149		0.0124575	0.00715794	0.0150844			0.000104659	0.00446682	0.0715849
	0.00577854	0.00250513	0.00080937		0.0130147	0.0037323	9.58791e-05		0.00258766	0.00699809	0.00599095			0.00306844	0.000206303	0.0228159		0.00060105	0.00298026	0.00904429			0.00200559	0.00202523	0.0196933
	0.00246535	0.00190248	0.000239511		0.0482863	0.00632037	0.00344735		0.00260762	0.00460984	0.000563873			0.00629781	0.00245976	0.0103199		0.00912928	0.00238554	0.00422756			0.0024665	0.0118684	0.0054659
	0.000997844	0.000570219	0.00415372		0.00121024	0.000207872	0.012766		0.00167596	0.00364284	0.0128984			0.000721245	0.00398524	0.00897873		0.0114658	0.00283612	0.00134301			0.0059873	0.0283776	0.00618746
	0.00274012	0.00147219	0.0334176		0.00300829	0.000805093	0.00234285		0.00638687	0.00764738	0.0157976			0.00234353	0.00279824	0.00302398		0.0109766	0.00449001	0.0159071			0.00807534	0.0155954	0.0723417
	0.000300531	0	0.0260436			0.0029708	0.029332		0.00281365	0.0019453	0.0138038			0.000702106	0.00228568	0.00999584			0.00101368	0.0082905				0.00701833	0.0713222
	0.00267221	0.000908914	0.041272			0.00294306	0.0154393			0.00411396	0.00365714			0.00167722	0.00677376	0.0298489			0.000484384	0.049356				0.00285359	0.00795144
	0.000888979	0.00283794	0.0599587			0	0.00523384			0.00273395	0.0198819			0.00991538	0.0037587	0.0183743			0.00301876	0.0299456				0.00132818	0.0697828
	0.00138267	0	0.0542129			0.00103881	0.010247			0.00596302	0.00290572			0.000139251	0.000391439	0.0146189			0.00238739	0.0333462				0.000193068	0.0267974
	0.000846815	0.00175861	0.225981			0.000306628	0.0316921			0	0.00736264			0.00172085	0.00736751	0.0397965			0.000505566	0.0229564				0.00893307	0.206017
	0.00129089	0.00293561	0.101233			0.00370456	0.010569			0.00123937	0.0139719				0.0060683	0.0110204			0	0.00267286				0.00241402	0.126467
	0.00256908	0.0063627	0.131621			0.00100001	0.02899			0.00523818	0.00412092				0.0012226	0.0134627			0	0.0110352				0.000145078	0.0280841
	0.011747	0	0.0366846			0.00170024	0.0100881			0.00902714	0.00274412				0.0072336	0.0144397			0.000344506	0.010491				0.000258575	0.127082
	0.000145042	0.000521366	0.0133847			0	0.0146298			8.68249e-05	0.00766924				0.00739562	0.0318989			0	0.00949561				0.000556992	0.0176394
	0.00172222	0.00124911	0.0309641			0	0.0098689			0.000400158	0.00811371				0.00608683	0.00348812			0.000113883	0.05638				0.00147597	0.0201811
	0.000847097	0.00050747	0.0505053			0.00560223	0.00606944			0.00118996	0.00328597				0.00542121	0.0261891			0	0.0714537				0.00221863	0.0378953
	0.00382817	0.000326007	0.0604118			0.000419862	0.00923558			0.00079052	0.0135558				0.00269932	0.012064			0	0.00359073				0.00140302	0.0101517
	0.00711557	0.000492301	0.0108332			0.0164439	0.0209898			0.000288173	0.0515571				0.00112156	0.00748609			0.000220201	0.00635633				0	0.0301147
	0.00123233	0.000633864	0.0301216			0.00418251	0.0296882			0.00900454	0.00867773				0.00193848	0.0174447			0	0.00727575				0.00199031	0.0300765
	0.00123482	0.0031623	0.0131866			0.00834257	0.0144411			0.00325115	0.00748132				0.00519991	0.0279661			0	0.00769436				0.00147926	0.0132319
	0.00133257	0.00719255	0.102144			0.00172674	0.00604959			0.000486414	0.00177518				0.00136397	0.0121454			0.000139794	0.0207608				0.000925898	0.0183726
	0.00466923	0.00292788	0.0704248			0.00354081	0.00508723			0.00223711	0.026697				0.00196062	0.00839084			0	0.00570557				0.00155568	0.0050234
	0.00150841	0.00185712	0.0479229			0.000377025	0.0525211			0.00325944	0.0133926				0.00265872	0.0636919			0.00532771	0.00514942				0.00183582	0.0166406
	0.0259723	0.00361095	0.0121662			0.00188387	0.00650159			0.0162469	0.00485282				0.00467839	0.0266143			0.000824037	0.00829124				0.00202069	0.0117346
	0.00472363	0.000881643	0.00917405			0.0118039	0.0101705			0.00347132	0.00958986				0.000449313	0.00630787			0.000532244	0.012994				0.00172803	0.0434669
	0.0133918	0.000648825	0.0311017			0.00048295	0.0186116			0.00344443	0.00669144				0.00290685	0.00582224			0.000270726	0.00886836				0.00585858	0.00972078
	0.00529461	0.00333798	0.0314487			0.0101659	0.0121195			0.00533301	0.00797123				0.00175649	0.0478595			0	0.0131618				0.0150783	0.00774165
	0.022875	0.00166803	0.0304911			0.00145772	0.0339816			0.0047148	0.00938998				0.00326004	0.0194689			0	0.00673585				0.00729585	0.0113908
	0.0174259	0.00340053	0.00611448			0.00357095	0.00566441			0.00307207	0.0164082				0.00475906	0.0128505			0.00077527	0.0491016				0.00237324	0.00305912
	0.0121491	0.00155769	0.0132071			0.0113646	0.0172399			0.00294766	0.015048				0.0147534	0.0282198			0.000408721	0.0275691				0.00398274	0.00383988
	0.000482881	0.000818712	0.0113011			0.0177884	0.011942			0.00523675	0.0122709				0.000844169	0.00653012			0.000734516	0.00697469				0.0146663	0.00626121
	0.00261566	0.00918701	0.013567			0.0118896	0.00451003			0.00123695	0.058916				0.00810245	0.00589378			0	0.0100207				0.00308638	0.0247343
	0.0115041	0.00524245	0.0216076			0.00891981	0.00967321			0	0.00333144				0.000657969	0.0092495			0.00073472	0.0184559				0.00443893	0.00610814
	0.0046205	0.00301641	0.0198527			0.00240478	0.0160235			0.00220747	0.0148722				0.00201682	0.00546754			0.000214646	0.0201905				0.0142712	0.0270409
	0.00266468	0.00247186	0.0135286			0.0207578	0.00906927			0.000147935	0.0261567				0.000993688	0.005303			0.000156946	0.0326814				0.00445434	0.0139994
	0.00586104	0.000800866	0.00923946			0.00450438	0.00332063			0.0011223	0.00276334				0.000958167	0.0157843			0.0087136	0.0144156				0.003605	0.0126478
	0.00693783	0.000337348	0.0134312			0.000236889	0.00640308			0.00333737	0.0108556				0.00295631	0.00767271			0.000112709	0.0223297				0.0369165	0.00933024
	0.00162997	0	0.00721405			0.000232749	0.0122204			0.00554465	0.0114496				0.00046273	0.00418021			0.000421197	0.0256435				0.00250453	0.0215477
	0.0027173	0.000501712	0.013439			0.0100984	0.00651352			0.00192424	0.0167682				0.0090489	0.0190647			0	0.0170507				0.000612049	0.0134085
	0.000822638	0.000640223	0.00852351			0.00720952	0.0557827			0.000331906	0.00253446				0	0.00634202			0.000150334	0.115747				0.00754717	0.0306663
	0.00976068	0	0.0124103			0.00367827	0.0263469			0.00364201	0.00396408				0.00132815	0.0066379			0	0.00744589				0.000397158	0.0112903
	0.000836582	0.00218393	0.025844			0.00569541	0.0860957			0.00367451	0.00637964				0.000182384	0.00345227			0.0027224	0.0378778				0.00221824	0.03204
	0.000597798	0.00597685	0.00950002			0.000495662	0.0506455			0.00645277	0.00683011				0	0.0159199			0.000110215	0.067176				0.00398408	0.0102451
	0.000350177	0.00458028	0.0575016			0.00349391	0.0390611			0	0.00607057				0.0014976	0.00691896			0.000286194	0.0108018				0.000337265	0.0144943
	0.00145857	0.00344829	0.0883459			0.00041639	0.0182053			0	0.00517008				0.000337695	0.0325205			0.000763526	0.00512208				0.00202911	0.0226999
	0.000481966	0.00818389	0.0195438			0.0083428	0.0417596			0.00666438	0.0218455				0.000385458	0.0130702			0.000219355	0.0267915				0.00936361	0.0231991
	0.000447917	0.00544988	0.0180332			0.00303613	0.0469878			0	0.0063591				0	0.043578			0.00041971	0.0109668				0.000972276	0.0124919
	0.00530342	0.00924133	0.0752259			0.000375044	0.044635			0.00130434	0.00645537				0.000231124	0.033337			0.000123482	0.021473				0.00104875	0.00769699
	0.000200483	0.010776	0.0696033			0	0.0203334			0.000659014	0.0307988				0	0.0362584			0.000121678	0.00730421				0.0020654	0.0160206
	0.00289435	0.000756696	0.0186171			0	0.0386703			0.000968971	0.0116989				0.000969793	0.0128118			0.000105097	0.0238788				0.0186203	0.0201356
	0.00457643	0.0049433	0.0327313			0.00760917	0.0770013			0.000265632	0.0125251				0.00244496	0.00252539			0.0020895	0.00751295				0.00138011	0.0292058
	0.00880039	0.013087	0.149825			0.00135536	0.0423102			0.00218736	0.0262825				0.00012117	0.0220018			0.00621008	0.017789				0.00085989	0.00331242
	0.0119794	0.00858205	0.0703707			0.00217828	0.0391113			0.000569052	0.0351431				0.00451448	0.0075275			0.000368738	0.00858538				0.00188862	0.0101466
	0.0153063	0.00600326	0.0295643			0	0.0491569			0.000474722	0.0396903				0.00095651	0.0591879			0.00247294	0.0161361				0.00210124	0.00926774
	0.00353878	0.00457528	0.0376215			0.00222626	0.0807446			0	0.0398373				0.00239997	0.038119			0.00972827	0.0108804				0.000613186	0.00718183
	0.00101324	0.0104205	0.0177359			0.00361603	0.0743446			0.000412048	0.0153919				0.00698195	0.00369758			0.000108373	0.00689168				0.000677406	0.007347
	0.00765971	0.00415846	0.0341824			0.00291707	0.0556985			0.000265961	0.03682				0.0045583	0.0382748			0.00070543	0.00520291				0.00236498	0.0288771
	0.0183263	0.00876004	0.0789984			0.00342711	0.0239199			0.00191116	0.0354822				0.00222538	0.0104552			0.00136846	0.00576446				0.000267654	0.0138229
	0.000572439	0.000457635	0.00797866			0.00498647	0.0274004			0.000925649	0.031771				0.000534037	0.0137618			0.000278453	0.0167212				0.000346183	0.0121295
	0.00526246	0.00414422	0.0471872			0.00971215	0.0237595			0.000253553	0.0288859				0.00904525	0.0242848			0.000228717	0.0133734				9.80025e-05	0.0231574
	0.00191124	0.000658279	0.0553278			0.00525026	0.0216062			0.000180684	0.0459654				0.00237609	0.00617862			0.00049081	0.0285662				0.000744869	0.0148302
	0.00548247	0.00665589	0.0396687			0.0025399	0.0112793			0.000131178	0.0348085				0.0012533	0.0273875			0.00200789	0.0163669				0.000585463	0.00944519
	0.00774485	0.00242215	0.00466287			0.00368766	0.0643646			0.00263601	0.010481				0.00235915	0.00576178			0	0.00233685				0.00077365	0.0472104
	0.00212696	0.0068922	0.0950609			0	0.0690266			0.00123593	0.0118146				0.0042814	0.00684569			0	0.0213264				0.000181132	0.0602448
	0.00218896	0.00356805	0.0366514			0.00134702	0.0499924			0.000135874	0.0123014				0.00161665	0.0537794			0.0136045	0.0227039				0	0.00620063
	0.0138532	0.00519835	0.0322669			0.00122014	0.0164489			0.00014013	0.0141915				0.00343188	0.00660263			0.00324824	0.0332161				0.00653376	0.010892
	0.0064402	0.0019903	0.0172467			0.000645486	0.0105252			0	0.00652297				0.00141251	0.0348602			0.00104691	0.00703761				0.00172059	0.0336069
	0.00344679	0.00452411	0.0237037			0.00352789	0.0129734			0.000102343	0.0331075				0.000735715	0.0134435			0.00158495	0.00584761				0.000934442	0.0183118
	0.00325223	0.0230732	0.0111062			0.00165951	0.0722545			0.000103621	0.0227685				0.00125789	0.00916059			0.000685481	0.0238062				0.00584279	0.110862
	0.00106831	0.00191908	0.0135324			0.00592618	0.0340314			0	0.0198623				0.00106768	0.0303531			0.00138205	0.00723734				0	0.0519625
	0.00628081	0.00485565	0.117503			0.00565041	0.0497126			0.00021873	0.0281377				0.00200282	0.0025819			0.00143629	0.0129675				0.0103908	0.00908188
	0.00323228	0.00727348	0.0577355			0.000178915	0.0654587			0.000261734	0.0274726				0.000877455	0.0309918			0.000714198	0.00738477				0.00116055	0.0129537
	0.0122827	0.00727348	0.0536887			0.00280026	0.1097			0.000651619	0.0232977				0.000381152	0.0383564			0.00194853	0.00327195				0.000797761	0.0568029
	0.00254376	0.00145964	0.145131			0.000160137	0.0545518			0.000672295	0.0293319				0.000867538	0.00785283			0.000606505	0.0302936				0	0.0158354
	0.007931	0.000895453	0.013142			0.00203069				0.000401128	0.0210239				0.00044499	0.0111721			0.00102846	0.0253594				0.00060981	0.0174319
	0.00873876	0.00300397	0.0186297			0.00347568				0.00141939	0.0283796				0.000699922	0.0136386			0.00289234	0.00510352				0.000221125	0.0525565
	0.00881976	0.000321635	0.0109331			0.00451807				0.00110942	0.0125251				0.00279031	0.0352508			0.000743911	0.0066061				0.00151298	0.0158826
	0.0139643	0.000321635	0.0532114			0.000161817				0	0.0164201				0.00757896	0.0102659			0	0.0531723				0	0.0174455
	0.0012655	0	0.037373			0.00258665				0.000264907	0.0110219				0.00514281				0.000255182	0.00872092				0.00463317	0.0120539
	0.00628775	0.0148515	0.0300814			0.001036				0.000831737	0.0149661				0.00186852				0.00200803	0.0273596				0.00161636	0.0104139
	0.00255188	0.0106793	0.00406666			0.000154814				0.00255102					0.00276954				0.0037276	0.0148265				0.000420882
	0.00377104	0.004628	0.0825637			0.000502572				0.00020181					0.000941012				0.00259281	0.0373301
	0.0132049	0.000664264	0.0212791			0.0038532				0.000251933					0.00373548				0.00440337	0.00840397
	0.00283342	0	0.00492053												0.0071542				0.00394681	0.0325547
	0.00716516	0.0140744	0.0558168												0.00315442				0.00582425	0.0390847
	0.00447803	0.00824999	0.00610372												0.00245236				0	0.016825
			0.00555243												0.00247865				0	0.052014
			0.00859373												0.000980515				0.00522343

## Sheet: Triple-as-mutant
			Pom1-as1 Shk1-as2 Kin1-as1					Pom1-as1 Shk1-as2 Pck1-as2					Pom1-as1 Kin1-as1 Pck1-as2					Shk1-as2 Kin1-as1 Pck1-as2
			0 min	DMSO	Treatment			0 min	DMSO	Treatment			0 min	DMSO	Treatment			0 min	DMSO	Treatment
				0.00777564	0.023821				0.0160446	0.0364189				0.000372343	0.0526365				0.00572674	0.0257032
				0.00290389	0.0511958				0.0287782	0.141288				0.00981143	0.0432612				0.012267	0.0328755
				0.0049426	0.0209426				0.000843735	0.0194379				0.00785373	0.0381577				0.0043177	0.0179921
				0.000302491	0.0614306				0.001183	0.0360567				0.00862365	0.0735133				0.0105659	0.0515019
				0.00952845	0.0444612				0.00607821	0.0829809				0.00350558	0.0342278				0.0411584	0.0178651
				0.00104126	0.0275141				0.00641903	0.075698				0.00997933	0.0383937				0.0436988	0.0220198
				0.00332836	0.0313902				0.0072109	0.0459444				0	0.087865				0.0148557	0.0148603
				0.00367186	0.0929905				0	0.0111523				0.000605005	0.0989717				0.0102162	0.0484205
				0.00661374	0.0595156				0.00259221	0.0296407				0.00568727	0.0643487				0.0303578	0.00915155
				0.00483986	0.0316845				0.000576003	0.0343751				0.00161008	0.0461379				0.00623375	0.0202532
				0.00735007	0.0637378				0	0.0784869				0	0.03848				0.0208204	0.104468
				0.00260985	0.0558136				0.00239063	0.0584411				0	0.00320692				0.00749631	0.0225458
				0.000201984	0.0166865				0.00197503	0.0401716				0.00183813	0.0086481				0.00512694	0.118552
				0	0.168038				0	0.0158583				0.00185877	0.103753				0.00196958	0.0712928
				0.0277709	0.104538				0.00568147	0.037057				0	0.00596787				0.00337171	0.115258
				0.0143523	0.12099				0.0214944	0.0257334				0.000871841	0.0213149				0.00413136	0.0768373
				0.00664354	0.0598797				0	0.048957				0.00339536	0.0288389				0	0.0830738
				0.00217091	0.072291				0.00240537	0.0123051				0.000190715	0.0290003				0.00719012	0.0840866
				0.00471549	0.0444988				0	0.0335452				0.000224736	0.015343				0.00143729	0.0369166
				0.0135784	0.0190459				0.00692856	0.0254602				0.00186347	0.0815933				0.0012605	0.0611009
				0.000952891	0.0796856				0.00377697	0.0711112				0.00169175	0.113375				0.000916316	0.0698709
				0.000514029	0.0348263				0.000989756	0.00431458				0.00274714	0.110694				0.0124976	0.0548675
				0.000571975	0.0415631				0	0.0233363				0.0193878	0.108767				0.00224468	0.0383055
				0.00100016	0.0440456				8.32945e-05	0.0459778				0.00292803	0.0529114				0.000739029	0.0115778
				0.00332497	0.0642035				0.00109769	0.00411378				0.00576379	0.0116931				0.00913461	0.0411102
				0.00315665	0.0224237				0	0.0307506				0.00546989	0.036708				0.000897983	0.0166851
				0.000882133	0.108501				0.00502818	0.0554893				0.00101165	0.0104004				0.00211267	0.0144963
				0.0028409	0.0525621				0.000570638	0.0333607				0.00305765	0.0275776				0.00311589	0.0133967
				0.00559708	0.0507866				0.00038435	0.0486069				0.00451988	0.0313857				0.00158563	0.00662535
				0.00344297	0.035084				0.00021626	0.0344398				0.00410712	0.0299665				0.0013965	0.0141389
				0.00502572	0.0109597				0	0.0330973				0.000367992	0.00760436				0.00154805	0.00872069
				0.00299906	0.042287				0.00627637	0.0106745				0.00143108	0.00640291				0.00231597	0.0120977
				0.0137144	0.0573085				0.00392158	0.041406				0.00233885	0.0179248				0.000392679	0.0105411
				0.00558816	0.010971				0.00836274	0.0135344				0.00403549	0.00655786				0.00276221	0.0136774
				0.00149116	0.0198519				0	0.0437565				0.00230831	0.0112243				0.00114967	0.0263825
				0.00131534	0.034254				0.00041376	0.0433077				0.0011505	0.0316117				0.00478324	0.0663218
				0.00371927	0.0169985				0.000227346	0.0137082				0.00177036	0.015838				0.0136418	0.0101476
				0.00543268	0.0209911				0.000814841	0.00998095				0.00188026	0.0109707				0.00167819	0.0230993
				0.00345874	0.0171197				0.00246627	0.0236211				0	0.0237012				0.00170355	0.00373293
				0.00310621	0.0880294				0.00399432	0.043353				0.00174622	0.00958814				0.000718583	0.0244427
				0.00146396	0.0246467				0	0.0275735				0.000205805	0.0456963				0.00126402	0.0225325
				0.00377364	0.0882686				0	0.0271163				0.00154582	0.0299489				0.00403608	0.0103266
				0.0123754	0.0444398				0.000814592	0.0332543				0.00111784	0.00835946				0.00122299	0.0174063
				0.00930808	0.0704066				0.000383592	0.0199164				0.00251582	0.00759222				0.00218692	0.0124517
				0.00405349	0.0449948				0.00806971	0.0480283				0.0114797	0.0229721				0.00305352	0.0327065
				0.00491328	0.0109875				0.00172278	0.0642416				0.000981323	0.0778582				0.00132558	0.0255785
				0.00132033	0.0386347				0.0046931	0.0259596				0.000580528	0.0639462				0.000524981	0.00967191
				0.00177385	0.076565				0.00894055	0.0703413				0.00125921	0.0811457				0.00060662	0.0417183
				0.00126501	0.0984167				0.00315681	0.133033				0.00543754	0.0759105				0.00168269	0.0356823
				0.00204257	0.082195				0.0110917	0.0304424				0.00303854	0.0810027				0.00295219	0.100035
				0.00486	0.174921				0.0212734	0.0766803				0.00397166	0.0455924				0.000101158	0.0285848
				0.000913154	0.0242244				0.00686531	0.0277672				0.00113542	0.0806409				0.00460782	0.0325575
				0.0118571	0.0184664				0.00790199	0.0241159				0.00191121	0.0455488				0.00152106	0.0104008
				0.00209256	0.0345654				0	0.0225316				0.00455184	0.0221713				0.00113898	0.055453
				0.000854242	0.0362308				0.000720542	0.0573666				0.00134205	0.0198091				0.000205325	0.0522286
				0.00126763	0.0340268				0.00247041	0.070858				0.00201363	0.0264575				0.00107648	0.0249803
				0.00355174	0.0161858				0.0125287	0.00880648				0.00110104	0.0324527				0.000424648	0.00765977
				0.0063678	0.0500395				0.0016667	0.0313628				0.0156447	0.0225571				0.000102302	0.0284966
				0.00177437	0.11194				0.00750666	0.0228906				0.00158846	0.0406423				0.00111387	0.00876714
				0.00238083	0.0574886				0.00192111	0.00959495				0.0049386	0.0337009				0.001549	0.0449327
				0.00179262	0.0456553				0.0275229	0.0428158				0.0116538	0.0298214				9.88185e-05	0.00691489
				0.00159139	0.0338952				0.00174935	0.0262427				0.0297542	0.065897				0.00357528	0.0278381
				0.000724042	0.0526829				0.00534222	0.0320316				0.00319312	0.0236269				0.0027675	0.046709
				0.00337358	0.00990052				0.00403866	0.0184515				0.00578641	0.020504				0.000536707	0.012664
				0.00316733	0.0348563				0.0154188	0.0082815				0.00448122	0.00592262				0.00386551	0.0394255
				0	0.0208191				0.00523925	0.0200197				0.00512867	0.0313728				0	0.00878603
				0.00197707	0.126807				0.0264806	0.0369656				0.00620616	0.0126582				0.000623638	0.00913909
				0.00327176	0.0987158				0.0128152	0.0349709				0.00770631	0.0294846				0.00567282	0.010974
				0.00155217	0.0493709				0.00553943	0.0118763				0.0107826	0.0245531				0.00178493	0.0476946
				0.000403337	0.0698428				0.00429021	0.0696574				0.00861175	0.0165216				0.00239612	0.0187844
				0.00570136	0.0135546				0.00146222	0.0223797				0.00290549	0.0572912				0.000266393	0.0343655
				0.0120989	0.12009				0.00110747	0.0296907				0.00422814	0.0254694				0.0068703	0.0083968
				0.00153408	0.0316893				0.00307268	0.00488093				0.0014457	0.0109454				0.00484923	0.017245
				0.0066208	0.108402				0.00592054	0.0670724				0.00285423	0.0884776				0.000413188	0.0363703
				0.000330498	0.0441715				0.00126855	0.019183				0.0129269	0.0387679				7.87417e-05	0.0390698
				0.00437797	0.027923				0.00286881	0.0249104				0.00140883	0.0483768				0.0016476	0.0534037
				0.00192659	0.0265779				0.0108573	0.0179634				0.000764308	0.0945769				0.00332021	0.0260342
				0.00370554	0.0162458				0.00922472	0.0263825				0.000360165	0.00573857				0.00582645	0.0196592
				0.00610127	0.0300831				0.00508915	0.0867754				0.00170243	0.0314271				0.000660953	0.0265945
				0.010615	0.0665874				0.00880078	0.0916235				0.00519782	0.0238619				0.00605582	0.00975343
				0.00131394	0.0373462				0.00369587	0.041781				0.0118232	0.032046				0.000701051	0.0146606
				0.00101253	0.0328065				0.00255039	0.0334617				0.0114236	0.0464636				0.00609107	0.0565548
				0.00156059	0.0753998				0.00375865	0.0576167				0.00425841	0.00994468				0.00627332	0.0329827
				0.000259329	0.0351342				0.00525912	0.0457886				0.0120839	0.0229721				0.00252639	0.0282519
				0.000208916	0.0209065				0.000325638	0.0078532				0.00524622	0.055657				0.000427493	0.0732767
				0.0005704	0.0840302				0.00280055	0.0539089				0.00356874	0.0643898				0.0015324	0.00749363
				0.000369803	0.0209739				0.0026477	0.013111				0.00640185	0.0665637				0.000506767	0.0248772
				0.00403537	0.0261089				0.00260705	0.0740535				0.000927073	0.0397747				0	0.00750907
				0.00109655	0.223528				0.00566189	0.0210242				0.00046479	0.0420567				0.000465973	0.00874368
				0.00313466	0.261288				0.00612962	0.0643668				0.0128048	0.148818				0.000423824	0.0517118
				0.0071044	0.201444				0.0031107	0.0451781				0.00259783	0.0114325				0.000945006	0.0364192
				0.0183131	0.0825335				0.0113142	0.0752418				0.00367313	0.0536589				0.000768788	0.0311867
				0.00854518	0.166269				0.00246697	0.0611381				0.000437442	0.0667495				0.000343064	0.0334708
				0.00889136	0.186619				0.00291888	0.218237				0.00135504	0.0396475				0.000264602	0.00708006
				0.00169656	0.0115385				0.000830509	0.180767				0.0119743	0.0030946				0.000579406	0.0310963
				0.00032587	0.102789				0.00286093	0.0391043				0.000207024	0.0353459				0	0.00795642
				0.00041949	0.0715454				0.00498024	0.0395165				0.00178161	0.0676852				0.00127609	0.00410717
				0.00391722	0.0289253				0.00258467	0.0297562				0.000832659	0.0118859				0.000268214	0.00991182
				0.00306072	0.0140747				0.00571756	0.0375715				0.00247028	0.0083766				0.000383725	0.111524
				0.00578115	0.222649				0.00772885	0.0156821				0.000367285	0.0624193				0.0123885	0.00829694
				0.00364342	0.140586				0.000903545	0.0258175				0.000481292	0.00935756				0.0125007	0.0327893
				0.00754543	0.117884				0.00825613	0.00377231				0.00878359	0.0380077				0.00278201	0.034759
				0.00315184	0.031055				0.0116196	0.0207994				0.00344007	0.0292424				0.0314492	0.00852716
				0.00316905	0.287154				0.00677781	0.0423175				0.00405437	0.03554				0.0268282	0.0145301
				0.003458	0.049626				0.0107244	0.0312828				0.00190111	0.0466438				0.001911	0.00692094
				0.031717	0.0255598				0.0217418	0.0261667				0.000510808	0.0245247				0.00442309	0.00820778
				0.0298403	0.0176283				0.00374521	0.013975				0	0.0175752				0.00071123	0.0439371
				0.0520392	0.0324703				0.00187489	0.0264049				0.00129723	0.0102623				0.00793392	0.0216819
				0.0182913	0.0244416				0.00170919	0.0380258				0.00163209	0.0284643				0.0239029	0.00795659
				0.0165106	0.0521128				0.00173272	0.0445796				0	0.00335722				0.000195906	0.00314721
				0.00852337	0.0509312				0.000294439	0.021034				0.000299741	0.0141019				0.0024607	0.021386
				0.00159538	0.0744511				0.000355573	0.019993				0.00197182	0.0269379				0.00464088	0.0123875
				0.00071445	0.125209				0.00146627	0.0342679				0.000222064	0.00368095				0.00220768	0.0289405
				0.0158078	0.00880075				0.00387456	0.0262186				0.00112367	0.00785806				0.00144181	0.0394769
				0.00614048	0.197898				0.00253689	0.0266427				0.00151771	0.0144826				0.00111567	0.0650415
				0.00625881	0.0922094				0	0.0165649				0.000732583	0.00664342				0.0395282	0.0358927
				0.0105357	0.0228351				0.000256654	0.0253096				0.00680561	0.0055056				0.0028717
				0	0.106069				0.000446759	0.0184898				0.00137651	0.019559				0.00494648
				0.0057378	0.0837271				0.00367859	0.0145689				0.0018806	0.0132108				0.00432851
				0.0547038	0.125225				0.000496389	0.0588782				0.00176149	0.0250503				0.00703717
				0.00228651	0.0157683				0.00473944	0.016677				0.00445753	0.0313182				0.00408015
				0.00287882	0.100668				0.00324414	0.0285034					0.0642284				0.00468392
				0	0.0120039				0	0.0171793					0.0852642				0.00266512
				0.00198793	0.0286154				0.00166018	0.0305591					0.059762				0.00194392
				0.00099228	0.0454283				0.018209	0.0690214									0.00792838
				0.00578227	0.0518741				0.00192778	0.0158092									0.00430528
				0.00290129	0.0484939				0.00252584	0.0557827									0.00316742
				0.00952773	0.0337109				0.00440931	0.0373137									0.00222575
					0.0154904				0.00586732	0.0587598									0.00171586
					0.131984				0.00394368	0.025453									0.000324926
					0.0168115				0.0135504	0.085329									0.00346077
					0.0145492				0.0235106	0.133606									0.00457695
									0.00145824	0.0107022									0.003406
									0.00179462	0.0448396									0.00481353
									0.00317232	0.0496391									0.00150897
									0.0029494	0.0667546									0.000870237
									0.00158638	0.0780356									0.000263771
									0.00197695	0.0860386									0.00118429
									0.0120977	0.105382									0.000388859
									0.00918469	0.0663575
									0.00178489	0.00428736
									0.00324699	0.0409954
									0.00104667	0.0617628
									0.00251524
