# Supplementary material for: La pintura de Europa Oriental (1917-1989)
Source: eLife journal article supplement (doi:10.7554/elife.83062), 1990-01-01
Supplement: fig5-data1 [file as mutant mNG-Cdc15 Compiled Data ALL (Cells In Column) 4-19-21.xlsx]

## Sheet: Single-as-mutant
				mNG-Cdc15 Pom1-as1 (3 Replicate)					mNG-Cdc15 Shk1-as2					mNG-Cdc15 Kin1-as1					mNG-Cdc15 Pck1-as2
				0 min (No Treatment)	15 min (DMSO)	15 min (3MB-PP1)			0 min (No Treatment)	15 min (DMSO)	15 min (3BrB-PP1)			0 min (No Treatment)	15 min (DMSO)	15 min (3MB-PP1)			0 min (No Treatment)	15 min (DMSO)	15 min (3MB-PP1+ 3BrB-PP1)
				0.0348776	0.000173275	0.0183514			0.000180583	0.0176925	0.0208585			0	0.0198637	0.0447106			0.00115275	0.000222873	0.0493784
				0.00641309	0.00147015	0.0639778			0	0.0984676	0.0314502			0.00141518	0.00833851	0.00169325			0.00102478	0.00095405	0.000581189
				0.00729156	0.00279829	0.0132586			0	0.00486945	0.0140427			0	0.00432518	0.00760835			0.00297899	0.00134874	0.00015102
				0.000132235	0.00132107	0.0198276			0.000146677	0.00159932	0.0820548			0	0.00332113	0.0069167			0.00370845	0.00033324	0.00315791
				0.000299487	0.00172567	0.0490797			0.00123637	0.00221272	0.0160273			0	0	0.02984			0.000625421	0.000205008	0.0152827
				0.00194084	0.00135995	0.0119226			0.00258317	0.000888964	0.0101123			0.000185172	0.000885425	0.0209307			0	0.000956482	0.0105339
				0.000466736	0.00236302	0.0221335			0	0.000228227	0.00650643			0	0.00177707	0.0195985			0.000880928	0	0.000165146
				0	0.000794122	0.0128144			0	0.00570988	0.0133121			0.000351729	0.00220584	0.00320138			0.000250519	0.0026354	0
				0.00206154	0.000884126	0.0270405			0	0.00647422	0.0215619			0.000352267	0.000707416	0.00267284			0	0.00384248	0.00364155
				0	0.00235088	0.0105475			0	0.00238973	0.0129194			0.000361417	0.0036552	0.00846629			0.000106554	0.00589811	0.00452954
				0	0.000315704	0.0112619			0.0172613	0.00125532	0.012121			0	0.00187432	0.00141473			0.000900994	0.00146389	0.00573944
				0.000890443	0.000662712	0.00811565			0.00820811	0	0.0281508			0	0.00465875	0.0236213			0.00106438	0.000553011	0.0323656
				0.00242836	0.000104413	0.0105066			0.00538103	0	0.0213932			0	0.00458187	0.0596792			0.00116008	0.000447316	0.00886727
				0.000104979	0.000344902	0.0130003			0	0.00505054	0.0119791			0	0	0.00131273			0.00454029	0.000229818	0.00388761
				0.00198803	0.000783729	0.030108			0.000250145	0.00300934	0.0242248			0	0.000139557	0.0492286			0.00836946	0.000918344	0.000704021
				0.000291939	0.000142113	0.0176194			0	0.000690128	0.0309185			0	0.0002922	0.0017551			0	0.00142732	0.00204235
				0.00100769	0.000594562	0.00952263			0.0024661	0.00153778	0.00503338			0.000664676	0.00223811	0.0116629			0.000412883	0.000892045	0.00382496
				0.00974368	0.0012006	0.0167413			0.00122814	0.00487305	0.00866904			0.000607884	0.000860604	0.00156275			0.00073719	9.9806e-05	0.00939629
				0.00303924	0.000364011	0.0256502			0.00189196	0.00140315	0.0133769			0	0.00108184	0.0564826			0.0016376	0.000554366	0.0166768
				0.00367009	0.000747045	0.00515621			0.000686794	0.00242619	0.0207659			8.65235e-05	0.00214528	0.00360831			0.000128879	0	0.00230445
				0.000990264	0	0.0306153			0.000861954	0.00126317	0.0073003			0.000639753	0.000285852	0.00141251			0.000143514	0	0.00426313
				0	0.000475107	0.0498483			0.00278509	0.000255237	0.00816101			0	0.000786055	0.00120828			0.000214556	0	0.000476808
				0.000331112	0	0.0885454			0.000998722	0.00281314	0.011852			0.000557922	0.00207932	0.00254047			0	0.005212	0.00596452
				0.00278501	0.000529231	0.0491757			0	0.00962013	0.0561125			0.000287942	0.000323944	0.00314804			0.000414479	0.00207886	0.00134682
				0.00114985	0.000393274	0.0144367			0.000407129	0.00504346	0.0505178			0.00044844	0.000822816	0.00289332			0.000251656	0.000525668	0.000108279
				0.00114985	0.00134178	0.0124659			0.00237505	0.00050501	0.00985561			0.00109321	0	0.00154377			0.000436397	0	0.000430456
				0.00109824	0.000516373	0.0249157			0.000623561	0.00190305	0.0260182			0.00024153	0.00123025	0.00111895			0.000850339	0.0020353	0.000166054
				0.00332559	0.00136134	0.0467444			0.00153049	0.00248586	0.0155093			0.000140202	0.00299067	0.00296393			0.000697481	0.000202234	0.000612229
				0.00199066	0	0.0605724			0.000123568	0.00231548	0.0427076			0.000552766	0.000597416	0.00509897			0.000889393	0	0.00460921
				0.0134071	0.000477291	0.0872711			0.00122609	0.00349838	0.0109183			0.00150866	0.00034995	0.0026525			0.000436344	0.00129314	0.0500295
				0.00515601	0	0.0570671			0.00176767	0.00827757	0.00902925			0.000657605	0.000306163	0.00389683			0.00380539	0.00371277	0.0147126
				0.0336969	0.000269066	0.0177143			0.000443047	0.00419653	0.0100523			0.00302408	0.000133465	0.00153622			0.000445431	0.000859921	0.0347396
				0.00176239	0.00296051	0.0638295			0.000768771	0.00296454	0.043494			0.000454833	0.000351435	0.0034945			0.00147	0.000289064	0.00157854
				0.00252129	0	0.013945			0.000245923	0.00338341	0.00840686			0.00118967	0.00168805	0.00668065			0.00013793	0	0.00102156
				0.000600677	0.000137604	0.0321174			0.00131066	0.003551	0.0254167			0.000343155	0	0.0171435			0.00181763	0.00235553	0
				0.00270591	0.000137604	0.0120341			0.00714201	0.00840686	0.0111994			0	0.00517248	0.0192544			0.00187748	0.00136236	0.00431396
				0	0.00270317	0.00437667			0.00160165	0.0254167	0.0730265			0.00233212	0.00281514	0.00659766			0.000186466	0.00258449	0.0102427
				0	0.00218662	0.0400585			0.00751745	0.0111994	0.0188601			0.00501288	0.00132303	0.00452022			0.00140944	0.0013548	0
				0.00168413	0.00504831	0.0614698			0.0154276	0.00699959	0.0123949			0.000119792	0.000609295	0.00549668			0.00181363	0.00189602	0.00104164
				0.00273594	0.00394315	0.0076447			0.0164592	0.00252988	0.0855573			0.000468811	0.000665759	0.00970426			0.00300751	0.00183918	0.000955286
				0.00183988	0.00271374	0.0524055			0.0149808	0.00707223	0.0299732			0.00200945	0.00077502	0.0345383			0.000317897	0.000378601	0.00146672
				0.000568068	0.00176222	0.0302296			0.0106164	0.00100328	0.00396822			0.000541552	0.00164639	0.00848255			0.000675537	0.00260411	0.00368185
					0.00105045	0.00900422			0.0137087	0.000318747	0.00707388			0.000260506	0.00244513	0.00236354			0.000994148	0.00218802	0.00350989
					0.000257898	0.0679338			0.0246638	0.00321754	0.00933136			0.000564325	0.00128764	0.00665087			0.0022319	0.000407443	0.0129596
					0.002346	0.00756237			0.0092231	0.00143841	0.0695363				0.000919734	0.00554377			0.00111664	0	0.0090813
					0.00157183	0.0172187			0.013564	0.00074673	0.0102838				0.000269038	0.00407886			0	0	0.00276208
					0.00559773	0.00621813			0.0280412	0.00260118	0.00442024				0.000230095	0.012762			0.000127397	0.00205563	0.00618009
					0.00348014	0.0103745			0.0172484	0.0127393	0.0878296				0.00082571	0.00524601			0.000347076	0.000484902	0.00635019
					0.000959953	0.0179299			0.0121458	0.00147944	0.00823899				0.00178874	0.00853671			0.00148891	0.000987877	0.00591362
					0.000239479	0.00381333			0.00524707	0.00336945	0.0131131				0.000882214	0.0126127			0.0110971	0.00138991	0.000965178
					0	0.00314253			0.0167558	0.00096305	0.00639988				0.000212427	0.00529462			0.000472477	0.000848574	0.0180047
					0.000409026	0.00461495			0.00035746	0.00449037	0.0181822				0.000473173	0.00513053			0.000151236	0.000155139	0.018954
					0.00160183	0.0426977			0.0139167	0.00293385	0.00828375				0.000158233	0.0078096			0.000658469	0	0.0117461
					0.00039054	0.0106992			0.00229405	0.0014863	0.0161462				0.000391959	0.0146254			0	0.000390433	0.00271933
					0.00406818	0.00320695			0.0019211	0.0020427	0.0044969				0.00596341	0.0209862			0.000279792	0.00166321	0.00611769
					0.00795908	0.0107743			0.00318445	0.0064016	0.0063007				0.000541361	0.0343629			0.000338182	0.0020606	0.000657844
					0.00308113	0.00469384			0.00810668	0.00222216	0.0135052				0.000160654	0.0156695			0	0.000930763	0.000876702
					0.00348388	0.00386037			0.00654064	0.00495886	0.00453393				0.000490656	0.00639197			0	0.000289387	0.0103855
					0.00837998	0.0741964			0.00468294	0	0.00760188				0.000155965	0.00699359			0.000673849	0.00104107	0.000158782
					0.00483937	0.0753564			0.00258679	0.00199983	0.00670326				0.00118205	0.00698635			0.000181319	0.00629719	0.0103131
					0.00152534	0.0243729			0.0173711	0	0.0128258				0	0.0128458			0.00468466	0.0038045	0.0159999
					0.000886096	0.038271			0.0029163	0.000921986	0.0199129				0	0.0102189			0.000620951	0.00382911	0.000289119
					0.000133465	0.0457416			0.000241267	0.00205556	0.0148954				0.000130726	0.00782167			0	0.00332331	0.000529315
					0.000351435	0.00757007			0.003541	0.000261732	0.01133				0.000410603	0.00848667			0.00259483	0.00123867	0.000235882
					0.00168805	0.032456			0.00302267	0.00148923	0.0137727				0	0.0182293			0.000296739	0.000760776	0.000110264
					0.00034995	0.0303884			0.00177071	0.00791573	0.0101983				0.00351467	0.0110847			0.000760867	0.000649551	0.000231029
					0.000306163	0.0497904			0.0036688	0.0220216	0.0192749				0.000911017	0.00668065			0.000181986	0	0.000689617
					0.000597416	0.0132658			0.000196512	0.00363322	0.0186813				0.000230837	0.0171435			0.000205352	0.000927992	0.00118807
					0.00123025	0.01962			0.00107471	0.00352995	0.0354857				0.00353737	0.0192544			0	0.00266843	0.000307564
					0.00299067	0.0154656			0.00528798	0.0107206	0.0108933				0.00109097	0.00659766				0.00281436	0.000968041
					0.000264948	0.00772915			0.00860029	0.0185508	0.0207925				0.00199743	0.00452022				0.00176051	0.0192601
					0.00046735	0.0337274			0.0132952	0.000339109	0.0186401				0.000427212	0.00549668				0.00162972	0.0170547
					0.00170524	0.0435643			0.00447565	0.0063705	0.0181483				0	0.00970426				0.00105899	0.000841962
					0.0108291	0.0123631			0.0014343	0.00994576	0.0156039				0.00103879	0.0345383				0.00248462	0.000940688
					0.0156872	0.0141159			0.00813118	0.00169738	0.0213609				0.00192085	0.00848255				0.00080139	0.00386034
					0.00752147	0.0384368			0.000140053	0.00122394	0.0127287				0	0.00236354				0.00476798	0.00368266
					0.00593526	0.00460097			0.00111352	0.00293946	0.0100563				0.00106749	0.00665087				0.00169009	0.00103467
					0.00178849	0.00618641			0.00120309	0.003353	0.0116781				0.000680418	0.00554377				0.00693694	0.00044642
					0.00140973	0.0149699			0.000955755	0.0208749	0.011278				0.00342144	0.00407886				0.00190999	0.000545192
					0.00167942	0.0351903			0.00101185	0.00195722	0.0144537				0	0.012762				0.00107737	0.00121256
					0.00075063	0.0158945			0.000400017	0.00401613	0.0179361				0	0.00524601				0.00209485	0.00531203
					0.0014276	0.0358327			0.00441156	0.00205556	0.0174777				0.00203896	0.00853671				0.00481101	0.00229689
					0.00730678	0.0274102			0.00306057	0.0198614	0.0136472				0.000609295	0.0126127				0.00102153	0.00056717
					0.00182204	0.0118931			0.00524817	0.000357447	0.0160142				0.000665759	0.00529462				0	0.016772
					0.00277008	0.0536211			0.00171825	0.00576465	0.019966				0.00077502	0.00513053				0.000713017	0.00119258
					0.00109592	0.0113403			0.00287711	0.0213812	0.0239406				0.00164639	0.0078096				0.000997648	0.000493818
					0.00380184	0.0469514			0.00336399	0.0152614	0.0190243				0.00244513	0.0146254				0.000458096	0.00467153
					0.00800497	0.0468043			0.0185774	0.00502193	0.00772141				0.00128764	0.0209862				0.00038495	0.029615
					0.00430876	0.0232565			0.000531884	0.00914459	0.0068639				0.000919734	0.0343629				0.000336646	0.010685
					0.00231772	0.0117621			0.000408379	0.00396884	0.00836514				0.000269038	0.0156695				0.00154828	0.000955311
					0.00125165	0.0205566			0.0010874	0.00680026	0.00715413				0.000230095	0.00639197				0.00105989	0.0100806
					0.00103459	0.0246028			7.17174e-05	0.00966678	0.0437406				0.00082571	0.00699359				0.00186191	0.00786934
					0.00171118	0.0305988			0.00116975	0.010249	0.0182024				0.00178874	0.00698635				0.000383228	0.000110619
					0.00430222	0.0137524			0.00697342	0.00165706	0.0397277				0.000882214	0.0128458				0	0.00069614
					0.00627593	0.0143495			0.00673273	0.006587	0.0199401				0.000212427	0.0102189				0.000167386	0.000354602
					0.00134785	0.0236175			0.00692275	0	0.0241115				0.000473173	0.00782167				0.000365965	0.000417425
					0.00173933	0.00488299			0.0255149	0.00943681	0.0194793				0.000158233	0.00848667				0.00019147	0.000383468
					0.000800677				0.00187106	0.000572173	0.0238031				0.000391959	0.0182293				0.000235748	0.0215898
					0.00635299				0.0025276	0.00247017	0.0730265				0.00596341	0.0110847				0.000217189	0.000177893
					0.00171546				0.0013698	0.00441305	0.0188601				0.000541361					0.000520095	0.000114517
					0.00104764				0.00560681	0.00343806	0.0123949				0.000160654					0.000232077	0.000580782
					0.00104806				0.00957929	0.00279923	0.0855573				0.000490656					0.000807204	0.00141885
					0.00182207				0.0120784	0.00285111	0.000568007				0.000155965					0.00155526	0.00212264
					0.0012737				0.00965848	0.000977675	0.0033233				0.00118205					0.000756215	0.00167875
					0.00303139				0.000231096	0.00812207	0.0299732				0					0.000376887	0.000878035
					0.00111274				0.00616078	0.00220806	0.00396822				0					9.56091e-05	0
					0.00113955				0.00531415	0.000995837	0.00333079				0.000130726					0.000126348	0
					0.00336581				0.00236009	0.00496105	0.000355421				0.000410603					0.000441276	0.000316032
					0.00253606				0	0.0046761	0.00707388				0					0.000172601	0.00532913
					0.00438062				0.000179839	0.00699959	0.00199828				0.00351467					0.000764805	0.000605812
									0.00914269	0.00252988	0.000236546				0.000911017					0.000500401	0.00199965
									0.00570308	0.00707223	0.00933136				0.000230837					0.000521489	0.00018861
									0.000977705	0.00100328	0.0695363				0.00353737					0.00015835	0.000732812
									0.000347017	0.000318747	0.0102838				0.00109097					0.00188243	0
									0.00316633	0.00321754	0.00442024				0.00199743					0.000378094	0.000633936
									0.00264217	0.00143841	0.0878296				0.000427212					0	0
									0.00794495	0.00074673	0.00823899				0					0.000877259	0.000215765
									0.0020137	0.00260118	0.0131131				0.00103879					0.000483988	0.000120084
									0.00243199	0.0127393	0.00639988				0.00192085					0	0.000213601
										0.00147944	0.0181822				0					0.000178692
										0.00336945	0.00828375				0.00106749					0.0041759
										0.00096305	0.0161462				0.000680418
										0.00449037	0.0044969				0.00342144
										0.00293385	0.0063007				0
										0.0014863	0.0135052				0
										0.0020427	0.00197307				0.00203896
										0.0064016	0.00453393
										0.00222216	0.00760188
										0.00495886	0.00670326
										0	0.00329956
										0.00199983	0.0128258
										0	0.0199129
										0.000921986	0.0148954
										0.00205556	0.01133
										0.000261732	0.00358279
										0.00148923	0.00395796
										0.00791573	0.00354523
										0.0220216	0.0137727
										0.00363322	0.0101983
										0.00352995
										0.0107206
										0.0185508
										0.000339109
										0.0063705
										0.00994576
										0.00169738
										0.00122394
										0.00293946

## Sheet: Double-as-mutant
	mNG-Cdc15 Pom1-as1 Shk1-as2 (THREE REPLICATE)				mNG-Cdc15 kin1as1 shk1as2				mNG-Cdc15 kin1as1 pck1as2					mNG-Cdc15 shk1as2 pck1as2				mNG-Cdc15 Pom1-as1 Pck1-as2					mNG-Cdc15 Pom1-as1 kin1as1
	0 min (No Treatment)	15 min (DMSO)	15 min (3MB-PP1+ 3BrB-PP1)		0 min (No Treatment)	15 min (DMSO)	15 min treatment		0 min (No Treatment)	15 min (DMSO)	15 min treatment			0 min (No Treatment)	15 min (DMSO)	15 min treatment		0 min (No Treatment)	15 min (DMSO)	15 min (3MB-PP1+ 3BrB-PP1)			0 min (No Treatment)	15 min (DMSO)	15 min (3MB-PP1)
	0.00487997	0.00942535	0.0783723		0.000860884	0.0038908	0.0560711		0.000157941	0	0.0369764			0.00018152	0.000838504	0.0389932		0.00186477	0.00367426	0.014872			0.00179616	0.00279319	0.0335675
	0.0127712	0.00580122	0.0543674		0	0.00958715	0.10177		0.00511567	0.000429634	0.00873354			0.000800602	0.000420597	0.00331043		0.000542095	0.0189485	0.0175756			0.00162698	0.00930151	0.00920928
	0.00798084	0.00633823	0.0971125		0.000883181	0.00865396	0.0410606		0.0127305	0.00172129	0.00466512			0.00179395	0.00191176	0.0622938		0.00636314	0.00170532	0.0159084			0.000198219	0.000232335	0.0291981
	0.0149541	0.00869694	0.0944063		0.0134141	0.0023106	0.000224742		0.000711176	9.23552e-05	0.049877			0.000204112	0.00164084	0.00477234		0.000716679	0.000768414	0.042643			0.000195652	0.00370451	0.101271
	0.000538368	0.0045924	0.0435564		0.00128029	0.00182734	0.0471624		0.00259718	0.00124707	0.0118854			0.000117795	0.00433568	0.00424808		0.00316807	0.00027962	0.0104315			0.000316345	0.00119106	0.0198927
	0.00111892	0.000312276	0.0537226		0.000802924	0.000869865	0.0694392		0	8.4636e-05	0.0156777			0.0021547	0.000701597	0.00406819		0.00145957	0.00265976	0.0771977			0.000500977	0.00156512	0.0457913
	0.00729607	0.00233334	0.00738724		0.00295301	0.0190658	0.000392594		0.000226178	0.000682173	0.0402384			0.00020688	0.00654652	0.0155002		0.00537775	0.000508213	0.0468663			0	0.00320307	0.00458352
	0.00458948	0.00391169	0.00592778		0.00829826	0.0220887	0.117738		0	0	0.0196061			0.00730621	0.00205731	0.00750288		0.0129258	0.00149321	0.0437504			0	0.00324137	0.00570772
	0.00154487	0.0303184	0.0144244		0	0.00639926	0.00168824		0	0.00228965	0.0242108			0.00126054	0.00163565	0.0336268		0.000844828	0.00564727	0.0454138			0.00280682	0.000492752	0.0356756
	0.00137823	0.0430662	0.041052		0.00339918	0.00425481	0.0518779		0.00118252	0.000630216	0.00780496			0.00048211	0.00121427	0.0126347		0.0022668	0.00137632	0.0325126			0.000111887	0.011459	0.0550284
	0.00759851	0.0108459	0.00505728		0.00831479	0.000991338	0.049512		0.000209413	0.00108399	0.0419818			0.00364431	0.00272519	0.106107		0.000533364	0.0271019	0.0254535			0.00323318	0.00479897	0.0326091
	0.0119703	0.00210923	0.0167914		0.00381156	0.0151241	0.0461873		0.000434168	0.000117658	0.0598412			0.00195635	0.00578453	0.00255243		0.00262677	0.00419165	0.00960408			0.000171476	0.00503428	0.153655
	0.00112116	0.00501458	0.0916504		0.00183975	0.000556096	0.0187604		0.000341824	0.00115368	0.0338762			0.00104306	0.00986236	0.00860584		0.00111751	0.00256917	0.0161943			0.000648448	0.000193945	0.0037095
	0.00536611	0.0140068	0.0570235		0.0206488	0.0119683	0.0577098		0	0.00063156	0.00804501			0.0013329	0.0123614	0.0439612		0.00283955	0.000861089	0.0287721			0.000478259	0.0047495	0.0161603
	0.00106356	0.001231	0.0463046		0.000815249	0.000575617	0.0359506		0.000155877	0.00032689	0.0354949			0.000453048	0.0112803	0.00461891		0.0089696	0.000174176	0.0479122			0.00991583	0	0.0530822
	0.00311987	0.00585545	0.00245124		0.00475246	0	0.0195012		9.78191e-05	0.000415128	0.00270057			0.0026945	0.00288349	0.00542856		0.0002924	0.000239179	0.00557135			0.000148761	0.00122726	0.0262007
	0.00272251	0.0153772	0.109587		0.00726949	0.00249485	0.00415384		0.00145335	0	0.0175256			0.00200096	0.005067	0.00278172		0.00186481	0.00063194	0.000406344			0.0225626	0.000635004	0.00523497
	0.00680117	0.000664778	0.145218		0.00117809	0.00302586	0.0235857		0.000136953	0	0.00997745			0.0198387	0.024859	0.00244257		0.000301049	0.00224364	0.00495639			0.00168088	0.00387661	0.00542726
	0.000391572	0.0065286	0.143006		0.00041557	0.00549576	0.0162626		0.000506925	0	0.0771453			0.00770491	0.00115341	0.00446421		0.00422755	0.00206427	0.0569872			0.00344612	0.000523173	0.0476452
	0.0101795	0.00317169	0.163365		0.00182521	0.00745093	0.0200149		0.000120661	0.000329045	0.0165084			0.00141991	0.000260383	0.00319977		0.000621982	0.00665793	0.0776695			0.000553987	0.000290981	0.00238562
	0.000675143	0.0168142	0.140166		0.0016661	0.00358074	0.0007467		9.61607e-05	0.000251004	0.0182559			0.00286427	0.000638687	0.00271711		0.00148996	0.000528293	0.0576838			0.000698334	0.00230422	0.0157786
	0.00753101	0	0.163922		0.0018068	0.0089818	0.0535191		0.000474568	0.00195382	0.0120077			0.000227512	0.000719948	0.00368167		0.00296469	0.00308986	0.0332542			0.00363434	0.0019313	0.00970793
	0.0040764	0.00887605	0.204719		0.000229282	0.0152974	0.0634063		0.000148595	0	0.0122771			0.00171786	0.000418617	0.00959751		0.00386519	0.00745687	0.0637488			0	0.00940924	0.0191655
	0.00196908	0.00584363	0.00596127		0	0.00510058	0.0110436		0.000466913	0.000517373	0.00225498			0.00225409	0.00261394	0.0374757		0.00107081	0.00954444	0.0236127			0.00130987	0.00178239	0.0108407
	0.000663301	0.0127242	0.178766		0	0.00261277	0.0338637		0.000155494	0.002428	0.0206421			0.00192911	0.0357798	0.00953487		0.00616098	0.000980374	0.049832			0.000313339	0.00143515	0.00416991
	0.000521994	0.00244569	0.00171273		0.00928311	0.00143576	0.0589575		0	0.000254702	0.00269476			0.00162805	0.00562775	0.0315071		0.00462253	0.00794967	0.0260589			0.000686477	0.00149391	0.0152387
	0.00177253	0.0105611	0.131409		0.00034006	0.00969947	0.00579024		0	0.00029147	0.00721341			0.00386434	0.00759573	0.00924517		0.0219284	0.00242944	0.0310818			0	0.000559973	0.00620776
	0.00257927	0.00626782	0.000843445		0.0122854	0.012956	0.141474		0.00372822	0.000654049	0.00278185			0.00452144	0.00389751	0.00857398		0.0157244	0.000100929	0.0732072			0.0032903	0.00148431	0.0121459
	0.00167189	0.00357023	0.00506145		0.00319941	0.0102053	0.0653053		0.00011368	0.000693992	0.0100254			0.00108592	0.00549548	0.0104053		0.0269999	0	0.0330623			0.00434473	0.00530729	0.0116689
	0.00516862	0.00329829	0.00248635		0.00467926	0.0157761	0.0295389		0.00645527	0	0.00309425			0.00195842	0.00133912	0.0379736		0.00227061	0.00102971	0.0119077			0.00126599	0.00992815	0.0133971
	0.01796	0.00183798	0.00224147		0.00447596	0.0121734	0.00393851		0.00134157	0.000931587	0.0112973			0.0182001	0.0150559	0.00997431		0.00440219	0.00291828	0.0500233			0.000152131	0.00188457	0.0063848
	0.0020955	0.00234111	0.145508		0.000469407	0.00507688	0.0125143		0.000185276	0.000319223	0.00591423			0.010223	0.00317344	0.0327751		0.0244427	0.0015315	0.040413			0.0012726	0.00310894	0.07293
	0.00456307	0.000871537	0.0113272		0.00170435	0.00686552	0.00448896		0.00378506	0	0.00852415			0.00331221	0.00147053	0.00785149		0.0124575	0.00715794	0.0150844			0.000104659	0.00446682	0.0715849
	0.00577854	0.00250513	0.00080937		0.0130147	0.0037323	9.58791e-05		0.00258766	0.00699809	0.00599095			0.00306844	0.000206303	0.0228159		0.00060105	0.00298026	0.00904429			0.00200559	0.00202523	0.0196933
	0.00246535	0.00190248	0.000239511		0.0482863	0.00632037	0.00344735		0.00260762	0.00460984	0.000563873			0.00629781	0.00245976	0.0103199		0.00912928	0.00238554	0.00422756			0.0024665	0.0118684	0.0054659
	0.000997844	0.000570219	0.00415372		0.00121024	0.000207872	0.012766		0.00167596	0.00364284	0.0128984			0.000721245	0.00398524	0.00897873		0.0114658	0.00283612	0.00134301			0.0059873	0.0283776	0.00618746
	0.00274012	0.00147219	0.0334176		0.00300829	0.000805093	0.00234285		0.00638687	0.00764738	0.0157976			0.00234353	0.00279824	0.00302398		0.0109766	0.00449001	0.0159071			0.00807534	0.0155954	0.0723417
	0.000300531	0	0.0260436			0.0029708	0.029332		0.00281365	0.0019453	0.0138038			0.000702106	0.00228568	0.00999584			0.00101368	0.0082905				0.00701833	0.0713222
	0.00267221	0.000908914	0.041272			0.00294306	0.0154393			0.00411396	0.00365714			0.00167722	0.00677376	0.0298489			0.000484384	0.049356				0.00285359	0.00795144
	0.000888979	0.00283794	0.0599587			0	0.00523384			0.00273395	0.0198819			0.00991538	0.0037587	0.0183743			0.00301876	0.0299456				0.00132818	0.0697828
	0.00138267	0	0.0542129			0.00103881	0.010247			0.00596302	0.00290572			0.000139251	0.000391439	0.0146189			0.00238739	0.0333462				0.000193068	0.0267974
	0.000846815	0.00175861	0.225981			0.000306628	0.0316921			0	0.00736264			0.00172085	0.00736751	0.0397965			0.000505566	0.0229564				0.00893307	0.206017
	0.00129089	0.00293561	0.101233			0.00370456	0.010569			0.00123937	0.0139719				0.0060683	0.0110204			0	0.00267286				0.00241402	0.126467
	0.00256908	0.0063627	0.131621			0.00100001	0.02899			0.00523818	0.00412092				0.0012226	0.0134627			0	0.0110352				0.000145078	0.0280841
	0.011747	0	0.0366846			0.00170024	0.0100881			0.00902714	0.00274412				0.0072336	0.0144397			0.000344506	0.010491				0.000258575	0.127082
	0.000145042	0.000521366	0.0133847			0	0.0146298			8.68249e-05	0.00766924				0.00739562	0.0318989			0	0.00949561				0.000556992	0.0176394
	0.00172222	0.00124911	0.0309641			0	0.0098689			0.000400158	0.00811371				0.00608683	0.00348812			0.000113883	0.05638				0.00147597	0.0201811
	0.000847097	0.00050747	0.0505053			0.00560223	0.00606944			0.00118996	0.00328597				0.00542121	0.0261891			0	0.0714537				0.00221863	0.0378953
	0.00382817	0.000326007	0.0604118			0.000419862	0.00923558			0.00079052	0.0135558				0.00269932	0.012064			0	0.00359073				0.00140302	0.0101517
	0.00711557	0.000492301	0.0108332			0.0164439	0.0209898			0.000288173	0.0515571				0.00112156	0.00748609			0.000220201	0.00635633				0	0.0301147
	0.00123233	0.000633864	0.0301216			0.00418251	0.0296882			0.00900454	0.00867773				0.00193848	0.0174447			0	0.00727575				0.00199031	0.0300765
	0.00123482	0.0031623	0.0131866			0.00834257	0.0144411			0.00325115	0.00748132				0.00519991	0.0279661			0	0.00769436				0.00147926	0.0132319
	0.00133257	0.00719255	0.102144			0.00172674	0.00604959			0.000486414	0.00177518				0.00136397	0.0121454			0.000139794	0.0207608				0.000925898	0.0183726
	0.00466923	0.00292788	0.0704248			0.00354081	0.00508723			0.00223711	0.026697				0.00196062	0.00839084			0	0.00570557				0.00155568	0.0050234
	0.00150841	0.00185712	0.0479229			0.000377025	0.0525211			0.00325944	0.0133926				0.00265872	0.0636919			0.00532771	0.00514942				0.00183582	0.0166406
	0.0259723	0.00361095	0.0121662			0.00188387	0.00650159			0.0162469	0.00485282				0.00467839	0.0266143			0.000824037	0.00829124				0.00202069	0.0117346
	0.00472363	0.000881643	0.00917405			0.0118039	0.0101705			0.00347132	0.00958986				0.000449313	0.00630787			0.000532244	0.012994				0.00172803	0.0434669
	0.0133918	0.000648825	0.0311017			0.00048295	0.0186116			0.00344443	0.00669144				0.00290685	0.00582224			0.000270726	0.00886836				0.00585858	0.00972078
	0.00529461	0.00333798	0.0314487			0.0101659	0.0121195			0.00533301	0.00797123				0.00175649	0.0478595			0	0.0131618				0.0150783	0.00774165
	0.022875	0.00166803	0.0304911			0.00145772	0.0339816			0.0047148	0.00938998				0.00326004	0.0194689			0	0.00673585				0.00729585	0.0113908
	0.0174259	0.00340053	0.00611448			0.00357095	0.00566441			0.00307207	0.0164082				0.00475906	0.0128505			0.00077527	0.0491016				0.00237324	0.00305912
	0.0121491	0.00155769	0.0132071			0.0113646	0.0172399			0.00294766	0.015048				0.0147534	0.0282198			0.000408721	0.0275691				0.00398274	0.00383988
	0.000482881	0.000818712	0.0113011			0.0177884	0.011942			0.00523675	0.0122709				0.000844169	0.00653012			0.000734516	0.00697469				0.0146663	0.00626121
	0.00261566	0.00918701	0.013567			0.0118896	0.00451003			0.00123695	0.058916				0.00810245	0.00589378			0	0.0100207				0.00308638	0.0247343
	0.0115041	0.00524245	0.0216076			0.00891981	0.00967321			0	0.00333144				0.000657969	0.0092495			0.00073472	0.0184559				0.00443893	0.00610814
	0.0046205	0.00301641	0.0198527			0.00240478	0.0160235			0.00220747	0.0148722				0.00201682	0.00546754			0.000214646	0.0201905				0.0142712	0.0270409
	0.00266468	0.00247186	0.0135286			0.0207578	0.00906927			0.000147935	0.0261567				0.000993688	0.005303			0.000156946	0.0326814				0.00445434	0.0139994
	0.00586104	0.000800866	0.00923946			0.00450438	0.00332063			0.0011223	0.00276334				0.000958167	0.0157843			0.0087136	0.0144156				0.003605	0.0126478
	0.00693783	0.000337348	0.0134312			0.000236889	0.00640308			0.00333737	0.0108556				0.00295631	0.00767271			0.000112709	0.0223297				0.0369165	0.00933024
	0.00162997	0	0.00721405			0.000232749	0.0122204			0.00554465	0.0114496				0.00046273	0.00418021			0.000421197	0.0256435				0.00250453	0.0215477
	0.0027173	0.000501712	0.013439			0.0100984	0.00651352			0.00192424	0.0167682				0.0090489	0.0190647			0	0.0170507				0.000612049	0.0134085
	0.000822638	0.000640223	0.00852351			0.00720952	0.0557827			0.000331906	0.00253446				0	0.00634202			0.000150334	0.115747				0.00754717	0.0306663
	0.00976068	0	0.0124103			0.00367827	0.0263469			0.00364201	0.00396408				0.00132815	0.0066379			0	0.00744589				0.000397158	0.0112903
	0.000836582	0.00218393	0.025844			0.00569541	0.0860957			0.00367451	0.00637964				0.000182384	0.00345227			0.0027224	0.0378778				0.00221824	0.03204
	0.000597798	0.00597685	0.00950002			0.000495662	0.0506455			0.00645277	0.00683011				0	0.0159199			0.000110215	0.067176				0.00398408	0.0102451
	0.000350177	0.00458028	0.0575016			0.00349391	0.0390611			0	0.00607057				0.0014976	0.00691896			0.000286194	0.0108018				0.000337265	0.0144943
	0.00145857	0.00344829	0.0883459			0.00041639	0.0182053			0	0.00517008				0.000337695	0.0325205			0.000763526	0.00512208				0.00202911	0.0226999
	0.000481966	0.00818389	0.0195438			0.0083428	0.0417596			0.00666438	0.0218455				0.000385458	0.0130702			0.000219355	0.0267915				0.00936361	0.0231991
	0.000447917	0.00544988	0.0180332			0.00303613	0.0469878			0	0.0063591				0	0.043578			0.00041971	0.0109668				0.000972276	0.0124919
	0.00530342	0.00924133	0.0752259			0.000375044	0.044635			0.00130434	0.00645537				0.000231124	0.033337			0.000123482	0.021473				0.00104875	0.00769699
	0.000200483	0.010776	0.0696033			0	0.0203334			0.000659014	0.0307988				0	0.0362584			0.000121678	0.00730421				0.0020654	0.0160206
	0.00289435	0.000756696	0.0186171			0	0.0386703			0.000968971	0.0116989				0.000969793	0.0128118			0.000105097	0.0238788				0.0186203	0.0201356
	0.00457643	0.0049433	0.0327313			0.00760917	0.0770013			0.000265632	0.0125251				0.00244496	0.00252539			0.0020895	0.00751295				0.00138011	0.0292058
	0.00880039	0.013087	0.149825			0.00135536	0.0423102			0.00218736	0.0262825				0.00012117	0.0220018			0.00621008	0.017789				0.00085989	0.00331242
	0.0119794	0.00858205	0.0703707			0.00217828	0.0391113			0.000569052	0.0351431				0.00451448	0.0075275			0.000368738	0.00858538				0.00188862	0.0101466
	0.0153063	0.00600326	0.0295643			0	0.0491569			0.000474722	0.0396903				0.00095651	0.0591879			0.00247294	0.0161361				0.00210124	0.00926774
	0.00353878	0.00457528	0.0376215			0.00222626	0.0807446			0	0.0398373				0.00239997	0.038119			0.00972827	0.0108804				0.000613186	0.00718183
	0.00101324	0.0104205	0.0177359			0.00361603	0.0743446			0.000412048	0.0153919				0.00698195	0.00369758			0.000108373	0.00689168				0.000677406	0.007347
	0.00765971	0.00415846	0.0341824			0.00291707	0.0556985			0.000265961	0.03682				0.0045583	0.0382748			0.00070543	0.00520291				0.00236498	0.0288771
	0.0183263	0.00876004	0.0789984			0.00342711	0.0239199			0.00191116	0.0354822				0.00222538	0.0104552			0.00136846	0.00576446				0.000267654	0.0138229
	0.000572439	0.000457635	0.00797866			0.00498647	0.0274004			0.000925649	0.031771				0.000534037	0.0137618			0.000278453	0.0167212				0.000346183	0.0121295
	0.00526246	0.00414422	0.0471872			0.00971215	0.0237595			0.000253553	0.0288859				0.00904525	0.0242848			0.000228717	0.0133734				9.80025e-05	0.0231574
	0.00191124	0.000658279	0.0553278			0.00525026	0.0216062			0.000180684	0.0459654				0.00237609	0.00617862			0.00049081	0.0285662				0.000744869	0.0148302
	0.00548247	0.00665589	0.0396687			0.0025399	0.0112793			0.000131178	0.0348085				0.0012533	0.0273875			0.00200789	0.0163669				0.000585463	0.00944519
	0.00774485	0.00242215	0.00466287			0.00368766	0.0643646			0.00263601	0.010481				0.00235915	0.00576178			0	0.00233685				0.00077365	0.0472104
	0.00212696	0.0068922	0.0950609			0	0.0690266			0.00123593	0.0118146				0.0042814	0.00684569			0	0.0213264				0.000181132	0.0602448
	0.00218896	0.00356805	0.0366514			0.00134702	0.0499924			0.000135874	0.0123014				0.00161665	0.0537794			0.0136045	0.0227039				0	0.00620063
	0.0138532	0.00519835	0.0322669			0.00122014	0.0164489			0.00014013	0.0141915				0.00343188	0.00660263			0.00324824	0.0332161				0.00653376	0.010892
	0.0064402	0.0019903	0.0172467			0.000645486	0.0105252			0	0.00652297				0.00141251	0.0348602			0.00104691	0.00703761				0.00172059	0.0336069
	0.00344679	0.00452411	0.0237037			0.00352789	0.0129734			0.000102343	0.0331075				0.000735715	0.0134435			0.00158495	0.00584761				0.000934442	0.0183118
	0.00325223	0.0230732	0.0111062			0.00165951	0.0722545			0.000103621	0.0227685				0.00125789	0.00916059			0.000685481	0.0238062				0.00584279	0.110862
	0.00106831	0.00191908	0.0135324			0.00592618	0.0340314			0	0.0198623				0.00106768	0.0303531			0.00138205	0.00723734				0	0.0519625
	0.00628081	0.00485565	0.117503			0.00565041	0.0497126			0.00021873	0.0281377				0.00200282	0.0025819			0.00143629	0.0129675				0.0103908	0.00908188
	0.00323228	0.00727348	0.0577355			0.000178915	0.0654587			0.000261734	0.0274726				0.000877455	0.0309918			0.000714198	0.00738477				0.00116055	0.0129537
	0.0122827	0.00727348	0.0536887			0.00280026	0.1097			0.000651619	0.0232977				0.000381152	0.0383564			0.00194853	0.00327195				0.000797761	0.0568029
	0.00254376	0.00145964	0.145131			0.000160137	0.0545518			0.000672295	0.0293319				0.000867538	0.00785283			0.000606505	0.0302936				0	0.0158354
	0.007931	0.000895453	0.013142			0.00203069				0.000401128	0.0210239				0.00044499	0.0111721			0.00102846	0.0253594				0.00060981	0.0174319
	0.00873876	0.00300397	0.0186297			0.00347568				0.00141939	0.0283796				0.000699922	0.0136386			0.00289234	0.00510352				0.000221125	0.0525565
	0.00881976	0.000321635	0.0109331			0.00451807				0.00110942	0.0125251				0.00279031	0.0352508			0.000743911	0.0066061				0.00151298	0.0158826
	0.0139643	0.000321635	0.0532114			0.000161817				0	0.0164201				0.00757896	0.0102659			0	0.0531723				0	0.0174455
	0.0012655	0	0.037373			0.00258665				0.000264907	0.0110219				0.00514281				0.000255182	0.00872092				0.00463317	0.0120539
	0.00628775	0.0148515	0.0300814			0.001036				0.000831737	0.0149661				0.00186852				0.00200803	0.0273596				0.00161636	0.0104139
	0.00255188	0.0106793	0.00406666			0.000154814				0.00255102					0.00276954				0.0037276	0.0148265				0.000420882
	0.00377104	0.004628	0.0825637			0.000502572				0.00020181					0.000941012				0.00259281	0.0373301
	0.0132049	0.000664264	0.0212791			0.0038532				0.000251933					0.00373548				0.00440337	0.00840397
	0.00283342	0	0.00492053												0.0071542				0.00394681	0.0325547
	0.00716516	0.0140744	0.0558168												0.00315442				0.00582425	0.0390847
	0.00447803	0.00824999	0.00610372												0.00245236				0	0.016825
			0.00555243												0.00247865				0	0.052014
			0.00859373												0.000980515				0.00522343

## Sheet: Triple-as-mutant
			Pom1-as1 Shk1-as2 Kin1-as1					Pom1-as1 Shk1-as2 Pck1-as2					Pom1-as1 Kin1-as1 Pck1-as2					Shk1-as2 Kin1-as1 Pck1-as2
			0 min	DMSO	Treatment			0 min	DMSO	Treatment			0 min	DMSO	Treatment			0 min	DMSO	Treatment
				0.00777564	0.023821				0.0160446	0.0364189				0.000372343	0.0526365				0.00572674	0.0257032
				0.00290389	0.0511958				0.0287782	0.141288				0.00981143	0.0432612				0.012267	0.0328755
				0.0049426	0.0209426				0.000843735	0.0194379				0.00785373	0.0381577				0.0043177	0.0179921
				0.000302491	0.0614306				0.001183	0.0360567				0.00862365	0.0735133				0.0105659	0.0515019
				0.00952845	0.0444612				0.00607821	0.0829809				0.00350558	0.0342278				0.0411584	0.0178651
				0.00104126	0.0275141				0.00641903	0.075698				0.00997933	0.0383937				0.0436988	0.0220198
				0.00332836	0.0313902				0.0072109	0.0459444				0	0.087865				0.0148557	0.0148603
				0.00367186	0.0929905				0	0.0111523				0.000605005	0.0989717				0.0102162	0.0484205
				0.00661374	0.0595156				0.00259221	0.0296407				0.00568727	0.0643487				0.0303578	0.00915155
				0.00483986	0.0316845				0.000576003	0.0343751				0.00161008	0.0461379				0.00623375	0.0202532
				0.00735007	0.0637378				0	0.0784869				0	0.03848				0.0208204	0.104468
				0.00260985	0.0558136				0.00239063	0.0584411				0	0.00320692				0.00749631	0.0225458
				0.000201984	0.0166865				0.00197503	0.0401716				0.00183813	0.0086481				0.00512694	0.118552
				0	0.168038				0	0.0158583				0.00185877	0.103753				0.00196958	0.0712928
				0.0277709	0.104538				0.00568147	0.037057				0	0.00596787				0.00337171	0.115258
				0.0143523	0.12099				0.0214944	0.0257334				0.000871841	0.0213149				0.00413136	0.0768373
				0.00664354	0.0598797				0	0.048957				0.00339536	0.0288389				0	0.0830738
				0.00217091	0.072291				0.00240537	0.0123051				0.000190715	0.0290003				0.00719012	0.0840866
				0.00471549	0.0444988				0	0.0335452				0.000224736	0.015343				0.00143729	0.0369166
				0.0135784	0.0190459				0.00692856	0.0254602				0.00186347	0.0815933				0.0012605	0.0611009
				0.000952891	0.0796856				0.00377697	0.0711112				0.00169175	0.113375				0.000916316	0.0698709
				0.000514029	0.0348263				0.000989756	0.00431458				0.00274714	0.110694				0.0124976	0.0548675
				0.000571975	0.0415631				0	0.0233363				0.0193878	0.108767				0.00224468	0.0383055
				0.00100016	0.0440456				8.32945e-05	0.0459778				0.00292803	0.0529114				0.000739029	0.0115778
				0.00332497	0.0642035				0.00109769	0.00411378				0.00576379	0.0116931				0.00913461	0.0411102
				0.00315665	0.0224237				0	0.0307506				0.00546989	0.036708				0.000897983	0.0166851
				0.000882133	0.108501				0.00502818	0.0554893				0.00101165	0.0104004				0.00211267	0.0144963
				0.0028409	0.0525621				0.000570638	0.0333607				0.00305765	0.0275776				0.00311589	0.0133967
				0.00559708	0.0507866				0.00038435	0.0486069				0.00451988	0.0313857				0.00158563	0.00662535
				0.00344297	0.035084				0.00021626	0.0344398				0.00410712	0.0299665				0.0013965	0.0141389
				0.00502572	0.0109597				0	0.0330973				0.000367992	0.00760436				0.00154805	0.00872069
				0.00299906	0.042287				0.00627637	0.0106745				0.00143108	0.00640291				0.00231597	0.0120977
				0.0137144	0.0573085				0.00392158	0.041406				0.00233885	0.0179248				0.000392679	0.0105411
				0.00558816	0.010971				0.00836274	0.0135344				0.00403549	0.00655786				0.00276221	0.0136774
				0.00149116	0.0198519				0	0.0437565				0.00230831	0.0112243				0.00114967	0.0263825
				0.00131534	0.034254				0.00041376	0.0433077				0.0011505	0.0316117				0.00478324	0.0663218
				0.00371927	0.0169985				0.000227346	0.0137082				0.00177036	0.015838				0.0136418	0.0101476
				0.00543268	0.0209911				0.000814841	0.00998095				0.00188026	0.0109707				0.00167819	0.0230993
				0.00345874	0.0171197				0.00246627	0.0236211				0	0.0237012				0.00170355	0.00373293
				0.00310621	0.0880294				0.00399432	0.043353				0.00174622	0.00958814				0.000718583	0.0244427
				0.00146396	0.0246467				0	0.0275735				0.000205805	0.0456963				0.00126402	0.0225325
				0.00377364	0.0882686				0	0.0271163				0.00154582	0.0299489				0.00403608	0.0103266
				0.0123754	0.0444398				0.000814592	0.0332543				0.00111784	0.00835946				0.00122299	0.0174063
				0.00930808	0.0704066				0.000383592	0.0199164				0.00251582	0.00759222				0.00218692	0.0124517
				0.00405349	0.0449948				0.00806971	0.0480283				0.0114797	0.0229721				0.00305352	0.0327065
				0.00491328	0.0109875				0.00172278	0.0642416				0.000981323	0.0778582				0.00132558	0.0255785
				0.00132033	0.0386347				0.0046931	0.0259596				0.000580528	0.0639462				0.000524981	0.00967191
				0.00177385	0.076565				0.00894055	0.0703413				0.00125921	0.0811457				0.00060662	0.0417183
				0.00126501	0.0984167				0.00315681	0.133033				0.00543754	0.0759105				0.00168269	0.0356823
				0.00204257	0.082195				0.0110917	0.0304424				0.00303854	0.0810027				0.00295219	0.100035
				0.00486	0.174921				0.0212734	0.0766803				0.00397166	0.0455924				0.000101158	0.0285848
				0.000913154	0.0242244				0.00686531	0.0277672				0.00113542	0.0806409				0.00460782	0.0325575
				0.0118571	0.0184664				0.00790199	0.0241159				0.00191121	0.0455488				0.00152106	0.0104008
				0.00209256	0.0345654				0	0.0225316				0.00455184	0.0221713				0.00113898	0.055453
				0.000854242	0.0362308				0.000720542	0.0573666				0.00134205	0.0198091				0.000205325	0.0522286
				0.00126763	0.0340268				0.00247041	0.070858				0.00201363	0.0264575				0.00107648	0.0249803
				0.00355174	0.0161858				0.0125287	0.00880648				0.00110104	0.0324527				0.000424648	0.00765977
				0.0063678	0.0500395				0.0016667	0.0313628				0.0156447	0.0225571				0.000102302	0.0284966
				0.00177437	0.11194				0.00750666	0.0228906				0.00158846	0.0406423				0.00111387	0.00876714
				0.00238083	0.0574886				0.00192111	0.00959495				0.0049386	0.0337009				0.001549	0.0449327
				0.00179262	0.0456553				0.0275229	0.0428158				0.0116538	0.0298214				9.88185e-05	0.00691489
				0.00159139	0.0338952				0.00174935	0.0262427				0.0297542	0.065897				0.00357528	0.0278381
				0.000724042	0.0526829				0.00534222	0.0320316				0.00319312	0.0236269				0.0027675	0.046709
				0.00337358	0.00990052				0.00403866	0.0184515				0.00578641	0.020504				0.000536707	0.012664
				0.00316733	0.0348563				0.0154188	0.0082815				0.00448122	0.00592262				0.00386551	0.0394255
				0	0.0208191				0.00523925	0.0200197				0.00512867	0.0313728				0	0.00878603
				0.00197707	0.126807				0.0264806	0.0369656				0.00620616	0.0126582				0.000623638	0.00913909
				0.00327176	0.0987158				0.0128152	0.0349709				0.00770631	0.0294846				0.00567282	0.010974
				0.00155217	0.0493709				0.00553943	0.0118763				0.0107826	0.0245531				0.00178493	0.0476946
				0.000403337	0.0698428				0.00429021	0.0696574				0.00861175	0.0165216				0.00239612	0.0187844
				0.00570136	0.0135546				0.00146222	0.0223797				0.00290549	0.0572912				0.000266393	0.0343655
				0.0120989	0.12009				0.00110747	0.0296907				0.00422814	0.0254694				0.0068703	0.0083968
				0.00153408	0.0316893				0.00307268	0.00488093				0.0014457	0.0109454				0.00484923	0.017245
				0.0066208	0.108402				0.00592054	0.0670724				0.00285423	0.0884776				0.000413188	0.0363703
				0.000330498	0.0441715				0.00126855	0.019183				0.0129269	0.0387679				7.87417e-05	0.0390698
				0.00437797	0.027923				0.00286881	0.0249104				0.00140883	0.0483768				0.0016476	0.0534037
				0.00192659	0.0265779				0.0108573	0.0179634				0.000764308	0.0945769				0.00332021	0.0260342
				0.00370554	0.0162458				0.00922472	0.0263825				0.000360165	0.00573857				0.00582645	0.0196592
				0.00610127	0.0300831				0.00508915	0.0867754				0.00170243	0.0314271				0.000660953	0.0265945
				0.010615	0.0665874				0.00880078	0.0916235				0.00519782	0.0238619				0.00605582	0.00975343
				0.00131394	0.0373462				0.00369587	0.041781				0.0118232	0.032046				0.000701051	0.0146606
				0.00101253	0.0328065				0.00255039	0.0334617				0.0114236	0.0464636				0.00609107	0.0565548
				0.00156059	0.0753998				0.00375865	0.0576167				0.00425841	0.00994468				0.00627332	0.0329827
				0.000259329	0.0351342				0.00525912	0.0457886				0.0120839	0.0229721				0.00252639	0.0282519
				0.000208916	0.0209065				0.000325638	0.0078532				0.00524622	0.055657				0.000427493	0.0732767
				0.0005704	0.0840302				0.00280055	0.0539089				0.00356874	0.0643898				0.0015324	0.00749363
				0.000369803	0.0209739				0.0026477	0.013111				0.00640185	0.0665637				0.000506767	0.0248772
				0.00403537	0.0261089				0.00260705	0.0740535				0.000927073	0.0397747				0	0.00750907
				0.00109655	0.223528				0.00566189	0.0210242				0.00046479	0.0420567				0.000465973	0.00874368
				0.00313466	0.261288				0.00612962	0.0643668				0.0128048	0.148818				0.000423824	0.0517118
				0.0071044	0.201444				0.0031107	0.0451781				0.00259783	0.0114325				0.000945006	0.0364192
				0.0183131	0.0825335				0.0113142	0.0752418				0.00367313	0.0536589				0.000768788	0.0311867
				0.00854518	0.166269				0.00246697	0.0611381				0.000437442	0.0667495				0.000343064	0.0334708
				0.00889136	0.186619				0.00291888	0.218237				0.00135504	0.0396475				0.000264602	0.00708006
				0.00169656	0.0115385				0.000830509	0.180767				0.0119743	0.0030946				0.000579406	0.0310963
				0.00032587	0.102789				0.00286093	0.0391043				0.000207024	0.0353459				0	0.00795642
				0.00041949	0.0715454				0.00498024	0.0395165				0.00178161	0.0676852				0.00127609	0.00410717
				0.00391722	0.0289253				0.00258467	0.0297562				0.000832659	0.0118859				0.000268214	0.00991182
				0.00306072	0.0140747				0.00571756	0.0375715				0.00247028	0.0083766				0.000383725	0.111524
				0.00578115	0.222649				0.00772885	0.0156821				0.000367285	0.0624193				0.0123885	0.00829694
				0.00364342	0.140586				0.000903545	0.0258175				0.000481292	0.00935756				0.0125007	0.0327893
				0.00754543	0.117884				0.00825613	0.00377231				0.00878359	0.0380077				0.00278201	0.034759
				0.00315184	0.031055				0.0116196	0.0207994				0.00344007	0.0292424				0.0314492	0.00852716
				0.00316905	0.287154				0.00677781	0.0423175				0.00405437	0.03554				0.0268282	0.0145301
				0.003458	0.049626				0.0107244	0.0312828				0.00190111	0.0466438				0.001911	0.00692094
				0.031717	0.0255598				0.0217418	0.0261667				0.000510808	0.0245247				0.00442309	0.00820778
				0.0298403	0.0176283				0.00374521	0.013975				0	0.0175752				0.00071123	0.0439371
				0.0520392	0.0324703				0.00187489	0.0264049				0.00129723	0.0102623				0.00793392	0.0216819
				0.0182913	0.0244416				0.00170919	0.0380258				0.00163209	0.0284643				0.0239029	0.00795659
				0.0165106	0.0521128				0.00173272	0.0445796				0	0.00335722				0.000195906	0.00314721
				0.00852337	0.0509312				0.000294439	0.021034				0.000299741	0.0141019				0.0024607	0.021386
				0.00159538	0.0744511				0.000355573	0.019993				0.00197182	0.0269379				0.00464088	0.0123875
				0.00071445	0.125209				0.00146627	0.0342679				0.000222064	0.00368095				0.00220768	0.0289405
				0.0158078	0.00880075				0.00387456	0.0262186				0.00112367	0.00785806				0.00144181	0.0394769
				0.00614048	0.197898				0.00253689	0.0266427				0.00151771	0.0144826				0.00111567	0.0650415
				0.00625881	0.0922094				0	0.0165649				0.000732583	0.00664342				0.0395282	0.0358927
				0.0105357	0.0228351				0.000256654	0.0253096				0.00680561	0.0055056				0.0028717
				0	0.106069				0.000446759	0.0184898				0.00137651	0.019559				0.00494648
				0.0057378	0.0837271				0.00367859	0.0145689				0.0018806	0.0132108				0.00432851
				0.0547038	0.125225				0.000496389	0.0588782				0.00176149	0.0250503				0.00703717
				0.00228651	0.0157683				0.00473944	0.016677				0.00445753	0.0313182				0.00408015
				0.00287882	0.100668				0.00324414	0.0285034					0.0642284				0.00468392
				0	0.0120039				0	0.0171793					0.0852642				0.00266512
				0.00198793	0.0286154				0.00166018	0.0305591					0.059762				0.00194392
				0.00099228	0.0454283				0.018209	0.0690214									0.00792838
				0.00578227	0.0518741				0.00192778	0.0158092									0.00430528
				0.00290129	0.0484939				0.00252584	0.0557827									0.00316742
				0.00952773	0.0337109				0.00440931	0.0373137									0.00222575
					0.0154904				0.00586732	0.0587598									0.00171586
					0.131984				0.00394368	0.025453									0.000324926
					0.0168115				0.0135504	0.085329									0.00346077
					0.0145492				0.0235106	0.133606									0.00457695
									0.00145824	0.0107022									0.003406
									0.00179462	0.0448396									0.00481353
									0.00317232	0.0496391									0.00150897
									0.0029494	0.0667546									0.000870237
									0.00158638	0.0780356									0.000263771
									0.00197695	0.0860386									0.00118429
									0.0120977	0.105382									0.000388859
									0.00918469	0.0663575
									0.00178489	0.00428736
									0.00324699	0.0409954
									0.00104667	0.0617628
									0.00251524
