# Supplementary material for: La pintura de Europa Oriental (1917-1989)
Source: eLife journal article supplement (doi:10.7554/elife.83062), 1990-01-01
Supplement: fig5-data1 [file cdc15-GFP mutants.xlsx]

## Sheet: background
mNG-cdc15 Localization			Number of pixels per image:
			2826560
							Rep 2							Rep 3
WT (3019)							WT (3019)							WT (3019)
SUM Background	Area	Mean	IntDen	RawIntDen			SUM Background	Area	Mean	IntDen	RawIntDen			SUM Background	Area	Mean	IntDen	RawIntDen
1	5494.65	7146.29	3.92664e+07	7561185995			1	5314.45	6317.25	3.35727e+07	6464812525			1	4853.56	7762.55	37675968	7254938764
2	4704.01	6792.64	3.19526e+07	6152836928			2	4171.65	6624.38	2.76346e+07	5321359304			2	4056.54	7740.06	3.13979e+07	6046021428
3	5233.18	6761.35	3.53834e+07	6813474139			3	5488.2	6261.45	3.43641e+07	6617198057			3	4471.94	7382.62	3.30147e+07	6357350708
4	3652.69	6740.73	2.46218e+07	4741214238			4	3946.65	6610.53	2.60894e+07	5023818463			4	5210.75	7448.8	3.88138e+07	7474039707
							5	6022.54	7008.65	4.22099e+07	8127994789
Average:		6860.25	3.2806e+07	6317177825										Average:		7583.51
							Average:		6564.45
11A (9446)							11A (9446)							11A (9446)
SUM Background	Area	Mean	IntDen	RawIntDen			SUM Background	Area	Mean	IntDen	RawIntDen			SUM Background	Area	Mean	IntDen	RawIntDen
1	3654.73	6837.89	2.49907e+07	4812235872			1	5469.36	6827.37	3.73413e+07	7190492283			1	3554.4	7331.98	2.60608e+07	5018307538
2	4546.21	6526.96	2.96729e+07	5713865678			2	5441.7	6892.93	3.75092e+07	7222827363			2	3701.11	7202.41	2.66569e+07	5133090509
3	4937.16	6673.09	3.29461e+07	6344144258			3	5766.72	6964.43	4.01619e+07	7733642038			3	4149.27	7265.82	3.01478e+07	5805308477
4	3567.14	6731.91	2.40137e+07	4624110886			4	3886.6	6866.24	2.66864e+07	5138764967			4	4406.71	7426.63	3.2727e+07	6301963540
							5	6071.72	6959.32	4.22551e+07	8136696519			5	4020.78	7641.39	3.07244e+07	5916333269
Average:		6692.46
							Average:		6902.06					Average:		7373.65
13A (8621)							13A (8621)							13A (8621)
SUM Background	Area	Mean	IntDen	RawIntDen			SUM Background	Area	Mean	IntDen	RawIntDen			SUM Background	Area	Mean	IntDen	RawIntDen
1	3640.07	7044.29	2.56417e+07	4937605651			1	3999.63	7069.63	2.82759e+07	5444844087			1	3781.54	7786.73	2.94458e+07	5670133723
2	4431.17	6682.48	2.96112e+07	5701978108			3	3248.17	6728.26	2.18546e+07	4208347414			2	4457.83	7387.35	3.29315e+07	6341346394
3	2054	6714.34	1.37913e+07	2655663234			4	4602.05	6944.22	3.19576e+07	6153805188			3	4721.16	7557.62	3.56807e+07	6870735145
4	4007.98	6728.12	2.69662e+07	5192648591										4	2574.77	7832.72	2.01674e+07	3883468176
Average:		6792.31					Average:		6914.04					Average:		7641.11
18A (8461)							18A (8461)							18A (8461)
SUM Background	Area	Mean	IntDen	RawIntDen			SUM Background	Area	Mean	IntDen	RawIntDen			SUM Background	Area	Mean	IntDen	RawIntDen
1	4246.68	6807.43	2.8909e+07	5566753951			1	4860.82	6523.09	3.17076e+07	6105653475			1	5505.27	7484.98	4.12068e+07	7934841561
2	3550.84	7459.19	2.64864e+07	5100259761			2	4913.36	6439.4	3.16391e+07	6092472643			2	5173.13	7203.14	37262823	7175382966
3	4214.52	7121.7	3.00145e+07	5779641132			3	6189.74	6400.66	3.96184e+07	7628972838			3	3521.57	7234.45	2.54766e+07	4905811227
4	3025.56	6664.24	2.01631e+07	3882630285			4	3502.53	6772.79	2.37219e+07	4567926125			4	4232.06	7082.42	2.99732e+07	5771687642
Average:		7013.14					Average:		6533.99					Average:		7251.25
27A (10307)							27A (10307)							27A (10307)
SUM Background	Area	Mean	IntDen	RawIntDen			SUM Background	Area	Mean	IntDen	RawIntDen			SUM Background	Area	Mean	IntDen	RawIntDen
1	5732.29	7075.88	4.0561e+07	7810484615			1	5723.21	7000.68	4.00663e+07	7715234007			1	2637.95	7168.98	1.89114e+07	3641613725
2	4638.05	6690.74	3.1032e+07	5975565021			2	3696.42	6508.04	2.40565e+07	4632347493			2	3232.22	7145.16	2.30947e+07	4447154281
3	5291.51	6701.54	3.54612e+07	6828468956			3	4905.41	6621.22	3.24798e+07	6254354787			3	4523.75	6602.81	2.98695e+07	5751710491
4	5147.78	6859.15	3.53094e+07	6799230692			4	6218.75	8284.28	5.15178e+07	9920346054			4	2131.21	7226.15	1.54004e+07	2965532349
5	2870.65	7118.12	2.04336e+07	3934731470			5	6650.94	8707.94	5.7916e+07	11152388122
6	3758.95	7009.86	2.63497e+07	5073941409
Average:		6909.22					Average:		7424.43					Average:		7035.77

## Sheet: WT
3019	cdc15 WT
rep1		Area	Mean	IntDen	RawIntDen		Ratio of RawIntDen		average of ratio:		rep2		Area	Mean	IntDen	RawIntDen		Ratio of RawIntDen		average of ratio:		rep3		Area	Mean	IntDen	RawIntDen		Ratio of RawIntDen		average of ratio:
1	1	103.48	53.28	5513.83	1061752		0.0208469		0.00762005		1	1	65.69	123.63	8121.86	1563957		0.0470254		0.0244742		1	1	74.55	2.76	205.43	39558		0.00212778		0.00613785
	2	49.36	5358.89	264491	50930859							2	37.95	4550.87	172712	33257732							2	47.45	2034.71	96546.8	18591188
	3	71.09	12.79	909.55	175145		0.00419828					3	55.42	122	6761.2	1301947		0.03443					5	56.71	4.1	232.28	44729		0.00300476
	4	50.52	4288.04	216649	41718299							4	46.74	4201.59	196375	37814338							6	36.49	2118.71	77305.4	14886033
	5	94.33	51.78	4884.25	940519		0.0171592					5	84.83	167.82	14236.3	2741362		0.0718923					7	73.25	0.72	52.93	10193		0.000525094
	6	52.08	5465.82	284643	54811213							6	47.96	4128.57	198023	38131514							8	50.12	2011.17	100808	19411772
	7	80.27	81.45	6537.97	1258961		0.0238864					7	56.99	9.96	567.66	109309		0.00477651					9	77.98	2.02	157.7	30366		0.00167811
	8	55.02	4974.63	273711	52706163							8	31.74	3744.22	118844	22884687							10	49.23	1908.79	93971.7	18095324
	9	49.73	377.8	18787.7	3617782		0.0790504					9	77.36	35.38	2736.84	527010		0.0127392					11	68.38	7.46	509.86	98180		0.00600798
	10	42.57	5583.2	237667	45765528							10	54.2	3963.71	214837	41369279							12	39.82	2131.14	84864.3	16341591
	11	55.5	17.23	956.6	184204		0.00509468					11	77.46	181.47	14057	2706840		0.0766594					13	97.14	2.01	195.42	37631		0.00205066
	12	46.16	4067.98	187764	36156166							12	46.06	3980.83	183370	35309973							14	62.26	1530.63	95297.8	18350678
	13	79.08	3.79	299.58	57687		0.00170171					13	65.77	36.64	2409.54	463985		0.0163873					15	59.49	14.58	867.53	167053		0.00912898
	14	50.06	3516.91	176045	33899475							14	42.37	3470.67	147037	28313733							16	41.63	2282.55	95030.4	18299204
	15	74.81	35.57	2660.76	512360		0.0148182					15	89.12	71.42	6365.11	1225675		0.0416129					17	60.31	7.82	471.35	90763		0.00476645
	16	39.22	4578.45	179561	34576464							16	45.08	3393.34	152960	29454224							18	44.39	2227.66	98888.1	19042038
2	1	75.34	1.01	75.75	14587		0.000722166					17	69.25	104.54	7239.25	1394000		0.0485063					19	71.76	3.12	223.87	43109		0.00200439
	2	44.65	2349.54	104896	20198960							18	38.13	3913.73	149243	28738544							20	47.03	2374.66	111690	21507264
	3	119.04	8.41	1000.64	192684		0.00622066					19	91.08	21.26	1936.23	372843		0.0122908					21	68.22	0.7	47.55	9157		0.000539575
	4	55.53	2896.74	160857	30974873							20	44.19	3564.64	157534	30335070							22	44.68	1972.43	88131.6	16970761
	5	74.78	11.26	842.22	162179		0.00730933					21	91.13	11.87	1081.81	208314		0.00656056					23	61.63	41.83	2578.07	496437		0.024328
	6	39.63	2907.61	115225	22187947							22	49.7	3317.92	164895	31752454							24	42.57	2489.14	105971	20406003
	7	47.66	31.67	1509.46	290664		0.01255					23	86.42	19.94	1722.97	331778		0.0114577					25	57.17	1.38	79.11	15233		0.000806405
	8	38.64	3112.97	120276	23160462							24	42.12	3570.49	150376	28956698							26	48.14	2037.98	98098.6	18890020
	9	77.69	3.22	250.01	48143		0.00176834				2	1	111.7	7.55	843.33	162393		0.00461182					27	69.94	8.58	599.92	115522		0.00633224
	10	47.07	3003.64	141383	27224973							2	55.69	3283.81	182863	35212335							28	42.79	2214.01	94741	18243463
	11	81.53	6.31	514.87	99145		0.00410495					3	53.93	132.75	7158.64	1378479		0.0467464					29	63.87	1.05	67.09	12919		0.000704737
	12	43.57	2878.73	125428	24152529							4	35.84	4272.45	153138	29488456							30	42.61	2234.2	95198.9	18331649
	13	76.86	9.94	764.1	147137		0.00465577					5	61.14	52.1	3185.26	613359		0.0149951					31	46.61	16.81	783.5	150871		0.00997572
	14	59.68	2750.01	164120	31603118							6	52.09	4078.17	212421	40904065							32	38.1	2061.31	78540.2	15123826
	15	68.71	8.56	588.17	113259		0.00400825					7	115.27	43.57	5021.98	967039		0.0289922					33	97.68	5.92	578.75	111444		0.00566264
	16	52.34	2803.5	146740	28256487							8	52.75	3283.96	173218	33355172							34	48.65	2100.6	102204	19680568
	17	119.91	1.46	174.93	33684		0.00108518					9	98.37	28.6	2813.57	541786		0.0136324					35	117.22	28.33	3320.88	639474		0.0293467
	18	55.07	2926.93	161196	31040100							10	52.06	3964.73	206388	39742464							36	64.06	1766.4	113160	21790299
	19	63.07	1.69	106.31	20471		0.000765661					11	89.11	53.41	4759.21	916441		0.0277175					37	77.54	1.5	116.41	22417		0.000950984
	20	50.78	2734.06	138846	26736379							12	44.88	3825.92	171704	33063570							38	58.55	2090.68	122415	23572424
	21	97.03	2.93	284.3	54746		0.00167318					13	109.6	9.68	1061.48	204400		0.00525514					39	68.49	4.69	321.14	61839		0.00360374
	22	52.89	3212.54	169919	32719764							14	60.53	3336.93	201989	38895264							40	44.11	2020.45	89112.7	17159668
	23	82.87	5.16	427.52	82323		0.00263588					15	85.63	18.25	1562.7	300916		0.0106455					1	61.57	11.18	688.6	132598		0.00622405
	24	53.57	3027.5	162191	31231657							16	41.86	3506.65	146795	28267094							2	45.37	2438.38	110636	21304150
	25	96.54	14.74	1423.17	274047		0.00872834					17	73.01	33.72	2461.71	474031		0.012751				5	3	77.77	32.33	2514.75	484244		0.0170495
	26	48.46	3364.48	163051	31397371							18	61.21	3154.25	193060	37175970							4	49.86	2957.95	147497	28402190
3	1	68.68	13.26	910.59	175344		0.0084691					19	114.49	5.35	612.39	117923		0.0036709					5	128.81	3.9	502.96	96851		0.00252145
	2	37.08	2899.72	107519	20703980							20	53.52	3116.99	166823	32123730							6	69.19	2882.83	199473	38410793
	3	62.36	12.67	790.11	152145		0.00553426					21	75.06	19.82	1487.96	286523		0.00954946					7	52.71	2.82	148.87	28667		0.00138277
	4	45.18	3160.31	142767	27491495							22	44.01	3540.73	155816	30004106							8	47.55	2264.01	107662	20731584
	5	79.63	3.32	264.23	50881		0.00180438																9	91.61	2.03	185.63	35746		0.00132366
	6	57.71	2537.67	146439	28198570																		10	61.69	2273.37	140243	27005387
	7	69.17	4.97	344.07	66255		0.002773																11	123.73	6.77	838.28	161420		0.0048853
	8	38.48	3224.84	124079	23892871																		12	67.67	2535.84	171592	33041976
	9	58.16	1.7	98.99	19062		0.000839577																13	116.66	15.02	1752.39	337442		0.00838463
	10	40.73	2894.85	117907	22704290																		14	79.41	2631.79	209000	40245303
	11	85.63	5.2	444.9	85671		0.00298445																15	82.45	27.1	2234.57	430292		0.0178257
	12	53.57	2782.92	149073	28705795																		16	41.92	2990.07	125357	24138841
	13	45.65	8.05	367.56	70778		0.00311396																17	99.16	4	396.93	76434		0.00236998
	14	39.13	3016.49	118036	22729246																		18	63.41	2641.36	167484	32250947
	15	102.34	43.07	4407.48	848710		0.0306755																19	87.22	10.54	919.15	176992		0.00429875
	16	51.29	2801.19	143681	27667400																		20	67.72	3157.43	213817	41172919
	17	100.81	5.16	520.24	100179		0.00282627																21	60.38	44.6	2692.85	518540		0.0149686
	18	64.22	2866.38	184074	35445657																		22	45.42	3960.87	179900	34641811
	19	58.62	9.19	538.44	103683		0.00447356																23	64.56	11.82	762.91	146907		0.00423963
	20	47.34	2542.71	120361	23176823																		24	45.43	3961.01	179947	34650913
	21	126.61	13.72	1736.62	334406		0.00800697																25	90.83	5.3	481.04	92630		0.00320034
	22	64.15	3381.18	216889	41764372																		26	48.29	3112.57	150309	28943767
4	1	47.8	22.51	1076.04	207203		0.00962818																27	48.98	17.88	875.98	168680		0.00643713
	2	40.35	2770.05	111759	21520484																		28	36.58	3720.6	136082	26204208
	3	116.1	3.28	380.34	73239		0.00233376																29	75.9	2.43	184.6	35546		0.00139306
	4	65.88	2473.78	162973	31382373																		30	50.35	2631.92	132511	25516473
	5	91.4	3.06	279.78	53875		0.00167552																31	79.03	6.86	541.94	104356		0.00477507
	6	63.1	2646.21	166981	32154146																		32	49.89	2274.84	113493	21854354
	7	71.31	13.27	946.36	182233		0.00567452
	8	54.66	3050.95	166774	32114257
	9	57.21	9.5	543.37	104633		0.00468821
	10	42.51	2726.4	115902	22318347
	11	61.43	6.9	423.76	81599		0.00330822
	12	44.88	2854.14	128092	24665503
	13	110.89	2.2	244.47	47076		0.00178397
	14	49.17	2786.82	137039	26388392
	15	79.91	0.29	23.34	4495		0.000153026
	16	60.4	2525.72	152544	29374069
	17	104.12	11.26	1172.33	225746		0.00767476
	18	52.17	2928.23	152752	29414098
	19	57.65	8.27	476.74	91801		0.00334986
	20	47.79	2977.77	142315	27404406
	21	75.4	4.31	325.31	62642		0.00187305
	22	60.32	2879.12	173679	33443802
	23	113.89	5.68	646.49	124490		0.00400943
	24	54.92	2935.83	161244	31049328
	25	68.8	31.63	2176.07	419028		0.0121512
	26	52.17	3432.99	179083	34484431
	27	108.77	4.98	541.78	104326		0.00315037
	28	56.23	3058.32	171973	33115469
	29	81.57	4.26	347.47	66909		0.00220375
	30	49.86	3162.32	157672	30361472

## Sheet: 11A
11A	9446	cdc15-11A
rep1	rep1		Area	Mean	IntDen	RawIntDen		Ratio of RawIntDen		average of ratio:		rep2		Area	Mean	IntDen	RawIntDen		Ratio of RawIntDen		average of ratio:		rep3		Area	Mean	IntDen	RawIntDen		Ratio of RawIntDen		average of ratio:
2	1	1	74.3	0.98	72.64	13987		0.000774549		0.0286693		1	1	54.82	45.32	2484.57	478432		0.022523		0.0467167		1	1	69.64	131.29	9142.71	1760533		0.0609603		0.0330662
		2	42.46	2208.42	93779.2	18058252							2	46.05	2395.34	110312	21241888							2	51.15	2931.98	149978	28880006
		3	88.38	6.15	543.79	104713		0.00395245					3	116.83	20.61	2407.46	463584		0.0192295					3	89.47	4.59	411.01	79144		0.00400671
		4	51.86	2652.77	137583	26493221							4	52.93	2365.15	125196	24107961							4	46.93	2185.78	102580	19752878
		5	80.6	4.84	390.21	75140		0.00258646					5	46.88	38.58	1808.68	348283		0.0190689					5	113.95	20.08	2288.06	440593		0.0129705
		6	55.89	2699.44	150868	29051328							6	39.48	2402.27	94850.1	18264482							6	73.82	2389.66	176406	33968954
		7	83.35	21.22	1768.28	340503		0.0100229					7	49.58	56.52	2802.4	539635		0.0261818					7	74.95	28.95	2169.66	417792		0.018524
		8	57.23	3082.51	176424	33972390							8	43.08	2484.46	107036	20611064							8	48.11	2434.6	117127	22554096
		9	99.74	70.27	7009.11	1349685		0.0365826					9	86.23	50.89	4388.35	845028		0.0377854					9	54.56	60.6	3306.64	636731		0.0358367
		10	57.7	3320.8	191597	36894132							10	46.91	2475.52	116139	22363871							10	38.68	2385.55	92269.5	17767558
		11	66.6	4.6	306.5	59020		0.00284057					11	74.59	51.5	3841.31	739689		0.0342607					11	62.97	18.46	1162.72	223896		0.0115841
		12	41.5	2600.12	107901	20777556							12	45.94	2440.38	112120	21590018							12	41.84	2399.19	100372	19327858
		13	71.01	3.82	271.41	52263		0.00252385					13	73.28	17.74	1300.22	250372		0.0118401					13	67.14	60.72	4076.83	785040		0.0344671
		14	48.3	2226.63	107538	20707640							14	39.51	2779.46	109815	21146118							14	39.22	3015.96	118282	22776509
		15	66.06	23.96	1582.51	304731		0.0147904					15	67.1	18.77	1259.25	242483		0.00818461					15	62.82	19.8	1243.74	239497		0.011939
		16	41.79	2560.06	106996	20603337							16	58.24	2641.94	153856	29626687							16	43.87	2374.52	104174	20059977
		17	135.34	18.76	2539.16	488945		0.0175321					17	52.89	5.6	296.3	57056		0.00251358					17	48.42	3.89	188.12	36225		0.00211678
		18	54.61	2652.02	144830	27888635							18	43.64	2701.31	117880	22699128							18	36.33	2446.15	88871.8	17113281
3		19	56.5	14.18	801.29	154298		0.00817764					19	103.7	42.59	4416.4	850428		0.029822					19	38.39	5.59	214.44	41293		0.00313618
		20	38.75	2528.92	97985.7	18868279							20	56.23	2633.62	148092	28516839							20	31.88	2145.1	68376.3	13166641
		21	68.38	54.35	3716.62	715678		0.0335894					21	78.66	31.08	2444.5	470716		0.0185129					21	111.01	2.42	268.52	51707		0.00224057
		22	43.82	2525.09	110649	21306671							22	47.01	2808.93	132043	25426393							22	55.16	2172.82	119845	23077574
		23	69.55	36.88	2564.72	493867		0.0154526					23	74.03	17.44	1290.92	248582		0.00849552					23	62.6	12.73	796.65	153404		0.00897899
		24	57.59	2882.14	165973	31960050							24	56.75	2677.8	151953	29260353							24	39.55	2243.27	88723.7	17084764
		25	51.28	31.96	1639.11	315629		0.0141239					25	131.75	122.41	16127.2	3105471		0.0703573					25	46.99	130.82	6146.95	1183665		0.0460396
		26	37.15	3123.72	116052	22347107							26	73.83	3104.63	229218	44138588							26	42.29	3157.28	133514	25709730
		27	77.82	22.7	1766.71	340201		0.0180877					27	115.86	62.1	7195.3	1385538		0.0391936					27	90.48	9.81	887.78	170953		0.00753943
		28	42.07	2321.74	97674.7	18808390							28	63.31	2899.77	183584	35351112							28	47.75	2465.96	117752	22674531
		29	51.97	18.11	941.34	181265		0.0121368				2	1	56.97	25.69	1463.73	281858		0.0136558					29	66.52	33.86	2252.82	433807		0.022524
		30	37.9	2046.48	77560.6	14935179							2	43.94	2439.16	107187	20640132							30	38.36	2607.25	100019	19259730
	2	1	71.97	34.7	2497.09	480844		0.0167169					3	88.88	187.48	16663.3	3208702		0.110942				2	1	48.36	80.38	3887.59	748601		0.0318944
		2	51.71	2888.53	149376	28764009							4	52.63	2853.98	150197	28922237							2	37.98	3209.52	121890	23471253
		3	83.43	58.93	4916.54	946737		0.0321404					5	83.71	17.36	1453.18	279827		0.0167794					3	82.01	21.09	1729.67	333068		0.0175865
		4	60.32	2535.83	152971	29456259							6	42.97	2015.32	86605	16676792							4	46.81	2101.05	98352.4	18938888
		5	84.32	23.58	1988.52	382913		0.0172303					7	47.62	350.47	16689.7	3213791		0.141072					5	64.31	28.72	1846.73	355610		0.0176248
		6	45.41	2541.25	115408	22223229							8	39.28	3011.8	118306	22781262							6	46.27	2264.76	104781	20176719
		7	79.08	140.16	11084.1	2134380		0.0711904					9	50.52	221.73	11202.8	2157227		0.0896763					7	113.34	157.57	17858.6	3438877		0.115764
		8	49.37	3153.6	155697	29981306							10	42.55	2936.13	124925	24055708							8	60.15	2564.84	154268	29705981
		9	105.58	76.3	8055.84	1551245		0.0525949					11	61.58	172.73	10637.1	2048291		0.104692					9	127.73	24.02	3068.49	590872		0.0212997
		10	58.23	2630.59	153168	29494230							12	36.3	2798.99	101604	19564954							10	63.91	2254.07	144062	27740856
		11	68.03	122.92	8362.26	1610249		0.0746229					13	40.55	72.88	2955.09	569036		0.0376303					11	114.96	94.09	10816.6	2082868		0.0648209
		12	41.2	2720.09	112060	21578484							14	33.66	2332.88	78529.5	15121755							12	61.36	2719.65	166870	32132669
		13	88.34	31.34	2768.35	533078		0.0215647					15	44.2	513.76	22710.2	4373119		0.200369					13	169.16	87.24	14758.2	2841859		0.0758626
		14	48.01	2673.87	128374	24719917							16	35.48	3194.57	113342	21825294							14	74.35	2616.69	194538	37460586
		15	55.62	196.45	10926.5	2104028		0.0713014					17	41.88	24.78	1037.54	199790		0.0145187					15	105.24	26.71	2810.63	541220		0.0236863
		16	45.74	3350.24	153244	29508915							18	33.77	2116.09	71462.4	13760915							16	54.72	2168.51	118661	22849539
		17	86.75	65.68	5697.53	1097124		0.0406143					19	54.31	71.51	3883.58	747828		0.0343305					17	66.16	53.77	3557.69	685074		0.0379715
		18	50.13	2798.14	140284	27013276							20	47.5	2381.72	113123	21783224							18	36.7	2552.97	93693.7	18041805
		19	82.01	21.33	1749.11	336811		0.0118854					21	54.21	48.84	2647.53	509813		0.0259499					19	80.25	76.91	6171.88	1188466		0.0511335
		20	53.89	2730.87	147165	28338242							22	44.74	2280.45	102025	19646055							20	49.33	2446.57	120701	23242419
		21	119	31.99	3806.47	732979		0.026462					23	56.04	107.57	6028.56	1160869		0.0573593					21	53.88	83.08	4476.1	861924		0.0531781
		22	52.04	2764.4	143847	27699338							24	43.02	2443.09	105102	20238545							22	39.54	2128.74	84171.8	16208236
		23	68.55	52	3564.83	686449		0.0259294					25	105.42	7.45	785.31	151221		0.00673899					23	75.4	180.21	13588.9	2616697		0.101212
rep2		24	48.75	2820.26	137482	26473776							26	61.73	1887.75	116533	22439712							24	55.05	2439.03	134262	25853698
2	3	1	101.94	156.64	15967.6	3074754		0.107128					27	96.51	51.82	5001.73	963140		0.0423921					25	83.92	36.09	3028.19	583113		0.030956
		2	53.74	2773.39	149053	28701787							28	55.72	2117.61	117987	22719816							26	45.26	2161.43	97822.6	18836855
		3	100.93	85.34	8613	1658531		0.0755461					29	59.73	20.27	1210.52	233100		0.0116212
		4	53.83	2117.87	114010	21953890							30	48.39	2152.62	104165	20058127
		5	153.01	29.23	4472.03	861141		0.0253065					31	52.18	60.7	3167.51	609940		0.0301387
		6	69.38	2547.04	176715	34028421							32	42.46	2474.96	105098	20237770
		7	81.32	34.94	2841.34	547133		0.0218598					33	44.22	207.22	9163.1	1764460		0.0980601
		8	48.68	2670.06	129980	25029183							34	33.71	2772.09	93443.8	17993667
		9	69.17	12.84	888.51	171093		0.00689938					35	42.16	239.6	10100.9	1945038		0.111039
		10	44.84	2872.17	128781	24798314							36	35.53	2560.17	90966.7	17516676
		11	140.52	10.22	1436.19	276554		0.01102
		12	61.96	2103.4	130326	25095673
		13	101.92	9.85	1004.28	193385		0.00785356
		14	52.17	2451.11	127875	24623874
3	4	1	51.77	24.92	1289.74	248354		0.0148179
		2	45.66	1906.1	87039.1	16760367
		3	56.37	130.56	7359.39	1417135		0.0592595
		4	43.09	2882.25	124189	23914046
		5	88.54	6.97	616.94	118799		0.00695694
		6	46.59	1903.5	88679.9	17076330
		7	135.23	8.95	1210.26	233049		0.00867087
		8	59.89	2330.46	139577	26877246
		9	84.5	85.24	7203.07	1387034		0.0620772
		10	48.05	2414.75	116034	22343694
		11	69.58	12.05	838.53	161468		0.00850226
		12	45.18	2183.15	98624.1	18991195
		13	91.76	53	4863.42	936507		0.0409652
		14	51.36	2311.53	118721	22861024
		15	114.34	55.57	6353.72	1223481		0.0448163
		16	54.25	2613.43	141772	27299896
		17	49.66	165.96	8242.09	1587109		0.0756725
		18	38.21	2850.42	108918	20973405
4
rep3
1
2
3

## Sheet: 13A
8621	cdc15-13A
rep1		Area	Mean	IntDen	RawIntDen		Ratio of RawIntDen		average of ratio:		rep2		Area	Mean	IntDen	RawIntDen		Ratio of RawIntDen		average of ratio:		rep3		Area	Mean	IntDen	RawIntDen		Ratio of RawIntDen		average of ratio:
1	1	64.56	77.95	5032.76	969116		0.0379295		0.049256		1	1	50.42	267.3	13477.3	2595203		0.143448		0.0610752		1	1	69.3	74.32	5150.85	991855		0.0383326		0.0535537
	2	49.53	2678.81	132687	25550464							2	38.94	2412.54	93952.4	18091613							2	51.07	2631.17	134372	25874967
	3	66.89	88.3	5905.97	1137263		0.0421972					3	73.02	53.97	3940.83	758852		0.0277097					3	80.06	8.16	652.93	125729		0.00652204
	4	57.7	2425.84	139961	26951127							4	57.04	2493.47	142218	27385751							4	48.2	2076.88	100111	19277556
	5	75.92	5.51	418.66	80617		0.0031717					5	56.71	63.9	3623.63	697772		0.0469573					5	83.76	95.56	8003.49	1541163		0.0540065
	6	61.19	2157.33	131997	25417605							6	44.15	1747.79	77168.7	14859712							6	52.3	2833.55	148195	28536633
	7	94.53	167.45	15829.1	3048076		0.09099					7	74.17	97.49	7230.96	1392404		0.045109					7	76.88	99.73	7668.01	1476563		0.0697905
	8	56.96	3054.25	173965	33499029							8	60.92	2631.28	160300	30867570							8	52.91	2076.46	109872	21157088
	9	72.11	73.21	5279.28	1016585		0.0390894					9	54.21	305.93	16584.8	3193595		0.112394					9	101.24	18.58	1880.46	362104		0.0149019
	10	39.86	3388.05	135056	26006661							10	45.38	3251.81	147560	28414298							10	61.62	2047.8	126189	24299151
	11	52.25	45.02	2352.3	452963		0.0243469					11	62.68	43.23	2709.56	521757		0.024051					11	100.11	22.04	2206.38	424863		0.0192723
	12	38.24	2526.42	96616.3	18604582							12	49.24	2288.14	112659	21693820							12	57.29	1998.3	114484	22045292
	13	100.11	135.37	13552.4	2609671		0.091023					13	48.38	553.63	26787	5158151		0.229215					13	77.9	30.84	2402.51	462631		0.0244332
	14	51.99	2863.9	148890	28670454							14	36.08	3238.85	116864	22503551							14	43.47	2261.92	98329.8	18934533
	15	70.61	71.17	5025.28	967675		0.0487177					15	49.28	302	14883.2	2865936		0.133406					15	77.38	193.21	14950.1	2878822		0.141586
	16	41.71	2473.28	103151	19862885							16	39.02	2859.03	111563	21482778							16	51.87	2035.72	105591	20332725
	17	81.22	27.45	2229.25	429268		0.0167602					17	51.18	168.83	8640.48	1663824		0.0720809					17	96.73	74.42	7198.68	1386189		0.059805
	18	46.63	2852.15	133009	25612345							18	41.73	2872.77	119872	23082731							18	50.46	2385.6	120369	23178490
	19	89.61	37.13	3326.99	640651		0.0292744					19	53.84	218.83	11782.4	2268833		0.0917906					19	57.49	98.25	5648.4	1087665		0.0625071
	20	45.15	2517.18	113649	21884344							20	43.58	2945.71	128361	24717478							20	40.85	2211.86	90364.2	17400669
	21	75.08	30.99	2326.38	447972		0.0187083					21	69.17	45.01	3113.51	599542		0.0277144					21	128.19	45.76	5865.3	1129431		0.0368882
	22	46.72	2661.75	124351	23945134							22	60.01	1872	112343	21632880							22	68.36	2326.04	159002	30617669
	23	61.09	71.68	4378.86	843200		0.0282746					23	59.99	102.15	6127.89	1179995		0.050454					23	89.61	108.07	9684.27	1864817		0.0902854
	24	44.79	3457.6	154869	29821799							24	49.04	2476.71	121455	23387533							24	52.43	2045.83	107263	20654693
	25	66.87	34.37	2298.49	442601		0.0235255					25	53.07	101.84	5404.88	1040772		0.0482605					25	143.73	5.3	761.32	146600		0.00628009
	26	37.02	2639.03	97702.1	18813660							26	44.38	2523.78	111994	21565709							26	74.86	1619.28	121227	23343601
	27	71.25	62.72	4468.74	860508		0.0306831					27	45.18	77.47	3500.05	673975		0.043615					27	74.55	22.56	1682.08	323903		0.0195519
	28	53.09	2743.32	145642	28045006							28	38.4	2089.63	80248.7	15452814							28	44.06	1952.65	86031.2	16566297
	29	64.33	25.18	1619.8	311912		0.0138333					29	64.86	5.94	385.08	74151		0.00401954					29	86	15.48	1331.41	256378		0.0152717
	30	43.14	2714.33	117095	22547934							30	50.27	1905.55	95801.4	18447655							30	47.07	1852.35	87181.7	16787835
	31	70.69	12.09	854.36	164517		0.00778389					31	63.1	46.5	2933.83	564942		0.0267279				2	1	96.54	33.35	3219.68	619986		0.0305482
	32	46.16	2377.99	109760	21135575							32	51.14	2146.3	109766	21136775							2	60.19	1750.96	105397	20295360
2	1	87.49	97.27	8510.27	1638751		0.0622165					33	79.84	175.86	14041.3	2703808		0.0817803					3	66.52	64.36	4281.6	824471		0.056856
	2	41.81	3271.58	136785	26339513							34	64.39	2666.49	171695	33061843							4	41.51	1813.99	75306	14501034
	3	97.81	54.57	5337.05	1027710		0.032989					35	54.21	26.73	1449.01	279024		0.0183402					5	90.96	84.24	7662.47	1475497		0.0839781
	4	50.26	3218.97	161783	31153146							36	43.11	1832.76	79007.2	15213752							6	51.08	1786.3	91243.7	17570026
	5	138.31	18.64	2578.8	496578		0.0159548					37	49.81	250.19	12461.4	2399577		0.107705					7	104.72	89.51	9373.48	1804972		0.0652422
	6	66.02	2448.4	161632	31124064							38	36.97	3129.54	115699	22279162							8	66.95	2145.96	143672	27665712
	7	53.67	395.09	21205.2	4083300		0.107088					39	58.67	150.18	8810.8	1696621		0.083338					9	91.97	18.97	1744.67	335956		0.0213805
	8	44.87	4412.73	198017	38130425							40	47.56	2223.01	105724	20358313							10	56.59	1441.84	81601	15713200
	9	96.13	28.88	2776.25	534599		0.0216843					41	65.22	33.78	2203.28	424266		0.0222353					11	58.27	182.47	10632	2047323		0.129007
	10	52.08	2458.25	128031	24653784							42	52.5	1887.32	99089.2	19080764							12	36.52	2256.8	82414.3	15869814
	11	66.6	460.13	30645.8	5901203		0.197269				2	1	44.85	275.21	12342.4	2376677		0.133845					13	54.22	163.58	8868.92	1707812		0.10781
	12	40.99	3789.52	155350	29914438							2	36.76	2508.4	92214.7	17756991							14	35.34	2327.84	82264.4	15840964
	13	71.79	67.72	4861.44	936126		0.0448125					3	63.42	182.64	11583.5	2230546		0.0906294					15	55.75	108.1	6027.21	1160608		0.0747492
	14	39.58	2740.73	108484	20889821							4	50.62	2525.06	127812	24611720							16	38.03	2119.97	80632.4	15526692
	15	78.93	82.21	6488.68	1249469		0.0482289					5	78.29	23.84	1866.08	359336		0.0143439					17	101.89	40.99	4176.23	804181		0.0267358
	16	43.71	3078.31	134539	25907060							6	65.96	1972.4	130096	25051484							18	74.58	2094.33	156204	30078807
	17	74	84.08	6222.43	1198200		0.0502645					7	75.4	9.43	711.03	136917		0.00563304					19	69.86	176.07	12299.8	2368464		0.114596
	18	43.59	2840.21	123794	23837889							8	63.87	1976.42	126225	24306062							20	43.6	2461.94	107332	20667991
	19	69.72	67.14	4680.89	901359		0.0340298					9	50.17	180.57	9058.66	1744349		0.0873709					21	97.06	22.74	2207	424984		0.0162173
	20	56.59	2430.7	137552	26487307							10	40.55	2556.65	103680	19964867							22	70.41	1932.71	136089	26205582
	21	58.11	72.25	4197.99	808371		0.036813					11	48.3	142.54	6884.09	1325611		0.0760059					23	77.96	58.47	4557.96	877688		0.059397
	22	45.94	2482.07	114036	21958845							12	40.03	2262.41	90573.1	17440887							24	47.73	1607.73	76737.2	14776633
	23	97.5	62.94	6136.19	1181594		0.0411463					13	71.8	38.68	2776.82	534708		0.025418
	24	53.06	2810.42	149131	28716863							14	61.09	1788.37	109246	21036611
	25	93.24	56.48	5266.47	1014120		0.0365611					15	91.18	16.45	1499.71	288787		0.00985707
	26	53.17	2709.29	144046	27737692							16	77.82	1955.12	152146	29297440
	27	52.19	363.85	18990	3656741		0.150187					17	64.83	34.49	2235.9	430549		0.0201569
	28	33.85	3734.9	126442	24347839							18	53.85	2059.78	110925	21359902
	29	110.36	42.55	4696.2	904307		0.0387741					19	66.05	7.18	474.32	91335		0.00465834
	30	52.24	2318.56	121117	23322444							20	55.77	1825.75	101821	19606765
	31	78.57	9.96	782.4	150660		0.00766579					21	61.18	193.97	11867.3	2285185		0.10551
	32	46.54	2193.23	102064	19653563							22	48.84	2303.12	112476	21658536
3	1	79.92	56	4475.77	861860		0.0316656					23	55.34	2.17	119.85	23079		0.0017006
	2	55.61	2541.79	141345	27217514							24	46.84	1504.56	70476.7	13571105
	3	65.66	244.19	16034.1	3087542		0.149646
	4	38.87	2756.48	107146	20632282
	5	64.34	97.32	6261.67	1205756		0.048677
	6	53.63	2398.39	128637	24770527
	7	59.98	282.55	16947.9	3263508		0.105932
	8	48.15	3323	159988	30807534
	9	117.62	8.85	1041.41	200536		0.00823597
	10	62	2039.43	126447	24348810
	11	140.86	135.7	19115.2	3680850		0.102691
	12	62.62	2972.63	186143	35843988
	13	94.52	10.3	973.92	187539		0.00926232
	14	53.67	1959.31	105148	20247529
	15	57.11	138.08	7886.53	1518642		0.0900385
	16	36.94	2371.23	87590.6	16866576
	17	75.01	113.32	8500.12	1636796		0.0612736
	18	47.28	2933.87	138724	26712911
	19	117.99	100.15	11817	2275491		0.0595732
	20	59.99	3306.49	198360	38196548
	21	94.39	200.78	18951.6	3649343		0.110685
	22	55.4	3090.9	171221	32970579
	23	61.32	103.32	6335.38	1219950		0.0578887
	24	40.15	2725.92	109441	21074079
	25	100.62	44.83	4511.12	868667		0.0335785
	26	58.52	2295.66	134345	25869749
	27	72.41	16.22	1174.36	226137		0.0124995
	28	46.55	2018.26	93952.8	18091695
	29	66.21	93.28	6176.03	1189266		0.0595036
	30	43.22	2401.35	103793	19986460
4	1	64.14	123.46	7918.66	1524829		0.0504223
	2	55.29	2840.34	157047	30241151
	3	80.2	57.41	4604.21	886594		0.0507384
	4	43.14	2103.51	90744.2	17473829
	5	82.63	22.49	1858.58	357891		0.0193871
	6	47.7	2009.61	95866.7	18460238
	7	82.67	110.89	9167.46	1765299		0.0674354
	8	55.77	2437.62	135944	26177630
	9	97.22	26.69	2594.44	499590		0.016915
	10	54.91	2793.2	153381	29535244
	11	66.63	137.7	9175.49	1766845		0.07662
	12	44.75	2676.09	119753	23059845
	13	76.52	51.02	3903.5	751663		0.0366636
	14	43.98	2420.79	106468	20501640
	15	94.66	42.7	4041.89	778313		0.0306702
	16	59.3	2222.34	131786	25376883
	17	64.81	149.83	9710.49	1869867		0.0859764
	18	37.52	3010.19	112944	21748602
	19	89.84	33.57	3016.05	580775		0.0339696
	20	49.4	1797.21	88786.7	17096893
	21	78.4	11.01	863.24	166226		0.0076462
	22	43.21	2612.94	112897	21739687
	23	88.34	43.44	3837.59	738972		0.0332111
	24	51.46	2245.28	115551	22250750
	25	82.11	44.93	3689.77	710508		0.0325589
	26	48.78	2323	113326	21822218

## Sheet: 18A
8461	cdc15-18A
rep1		Area	Mean	IntDen	RawIntDen		Ratio of RawIntDen		average of ratio:		rep2		Area	Mean	IntDen	RawIntDen		Ratio of RawIntDen		average of ratio:		rep3		Area	Mean	IntDen	RawIntDen		Ratio of RawIntDen		average of ratio:
1	1	98.28	14.99	1473.63	283765		0.0167709		0.0504759		1	1	70.52	42.42	2991.27	576004		0.0295619		0.0588989		1	1	77.21	15.21	1174.47	226158		0.0138837		0.0516209
	2	49.76	1766	87868.3	16920057							2	45.82	2208.4	101187	19484690							2	47.55	1779.11	84593.8	16289500
	3	70.98	32.97	2340.14	450621		0.024451					3	47.3	146.54	6931.27	1334696		0.0757966					3	67.84	65.37	4434.66	853945		0.060656
	4	40.11	2386.32	95707.2	18429521							4	38.79	2357.28	91445.7	17608917							4	52.83	1383.91	73111.7	14078492
	5	43.84	45.51	1995.27	384213		0.0212626					5	56.11	260.95	14641.1	2819312		0.148788					5	53.03	51.24	2717.33	523253		0.0488977
	6	36.03	2604.48	93839.6	18069897							6	46.21	2129.28	98402.4	18948504							6	43.49	1277.73	55571.7	10700976
	7	62.93	57.47	3616.31	696362		0.0445776					7	68.89	225.64	15544.5	2993275		0.172033					7	70.52	199.22	14049.8	2705453		0.136697
	8	46.21	1755.4	81123.9	15621336							8	41.8	2161.42	90357.8	17399434							8	47.74	2152.91	102781	19791660
	9	78.15	4.22	329.98	63541		0.00489582					9	90.69	62.04	5626.93	1083530		0.0467399					9	77.23	37.72	2913.49	561025		0.0333185
	10	40.47	1665.64	67399.9	12978631							10	52.51	2292.76	120388	23182115							10	54.13	1615.49	87443.5	16838256
	11	97.35	5.97	580.83	111846		0.00719784					11	59.49	166.48	9903.59	1907049		0.0880027					11	68.32	133.29	9106.65	1753590		0.104473
	12	46.97	1718.14	80695.4	15538833							12	44.61	2522.45	112537	21670348							12	48.17	1809.52	87167.3	16785064
	13	83.01	1.96	162.3	31253		0.00218796					13	61.75	6.04	372.69	71765		0.00469804					13	95.32	5.39	513.61	98902		0.00632129
	14	44.41	1670.46	74179.3	14284078							14	46.98	1688.65	79328	15275524							14	54.82	1482.18	81251.2	15645859
	15	47.93	7.87	377.15	72624		0.00638257					15	58.58	6.99	409.39	78832		0.00459131					15	101.7	13.52	1374.72	264719		0.0136897
	16	37.8	1563.19	59090.2	11378493							16	45.43	1962.49	89165.5	17169843							16	56.31	1783.21	100421	19337129
	17	92.15	36.05	3322.08	639704		0.0411217					17	58.89	216.4	12743.9	2453986		0.106812					17	66.65	42.06	2803.4	539826		0.0313356
	18	48.32	1672.01	80786.5	15556364							18	45.91	2598.95	119311	22974742							18	59.57	1501.94	89463.6	17227249
	19	63.21	54.21	3426.83	659875		0.0313962					19	74.58	87.09	6495.55	1250793		0.0606489					19	65.87	1.82	119.99	23105		0.00198094
	20	52.11	2094.44	109148	21017674							20	58.85	1819.94	107101	20623513							20	48.88	1239.23	60571.2	11663672
	21	53.84	127.48	6864.08	1321757		0.0914914				2	1	63.24	25.38	1604.98	309057		0.0248837				2	1	70.01	32.83	2298.85	442669		0.0399899
	22	38.63	1942.29	75024.3	14446788							2	43.47	1483.88	64499.3	12420082							2	42.36	1357.22	57485.6	11069516
	23	74.69	10.59	790.69	152257		0.0110799					3	55.57	8.92	495.84	95479		0.00675754					3	41.55	15.45	641.8	123585		0.012044
	24	42.79	1667.69	71363	13741768							4	44.39	1652.93	73375.3	14129264							4	35.06	1519.94	53287.4	10261093
	25	54.14	26.24	1420.86	273602		0.0163989					5	53.98	3.54	191.27	36832		0.00377499					5	117.99	28.32	3340.96	643340		0.0396013
	26	38.67	2240.69	86643.6	16684210							6	41.38	1224.51	50668.8	9756858							6	61.87	1363.67	84364.9	16245431
2	1	68.57	125.43	8600.45	1656116		0.101657					7	55.6	204.24	11356.2	2186768		0.123844					7	66.84	14.66	979.6	188633		0.0118978
	2	48.26	1753.06	84602.7	16291214							8	44.76	2048.43	91697.9	17657478							8	50.13	1642.26	82334.4	15854426
	3	72.62	0.44	31.79	6121		0.000659775					9	89.07	12.88	1147.65	220993		0.0171434					9	56.47	372.82	21051.4	4053693		0.232685
	4	42.64	1129.87	48178.9	9277402							10	48.84	1370.78	66944.1	12890844							10	45.26	1999.01	90471.6	17421346
	5	85.9	19.01	1632.84	314423		0.0202871					11	71.18	227.44	16188.2	3117225		0.145987					11	113.71	7.47	848.89	163463		0.00986695
	6	44.52	1807.84	80486.7	15498641							12	55.38	2002.32	110888	21352784							12	61.41	1400.99	86033.4	16566712
	7	49.26	135.12	6656.36	1281758		0.0961077					13	76.96	0.53	40.96	7887		0.000477168				3	1	129.96	15.88	2064.11	397468		0.0216232
	8	42.95	1612.46	69259.3	13336679							14	57.24	1499.48	85836.4	16528778							2	71.04	1343.78	95457.9	18381516
	9	54.59	305.73	16690	3213842		0.196676					15	64.83	14.57	944.61	181895		0.0116177					3	62.6	57.3	3586.67	690655		0.0711266
	10	42.25	2008.7	84860.2	16340807							16	51.42	1581.16	81307.4	15656676							4	43.02	1172.17	50426.6	9710223
	11	99.58	20.48	2039.45	392720		0.0219251					17	61.47	129.56	7964.49	1533654		0.113349					5	85.68	72.74	6231.86	1200016		0.0836134
	12	48.92	1901.27	93019.1	17911894							18	40.93	1716.61	70265.1	13530350							6	47.57	1566.81	74531.8	14351955
	13	145.24	25.75	3740.11	720201		0.0283623					19	67.24	317.5	21349	4110997		0.145096					7	56.34	189.67	10685.2	2057550		0.149453
	14	65.08	2026.41	131869	25392900							20	55.32	2659.63	147137	28332992							8	39.81	1796.11	71495.1	13767207
	15	72.29	43.52	3146.23	605842		0.0326319				3	1	41.8	78.75	3292.14	633939		0.0511679					9	70.19	22.6	1586.5	305499		0.0320872
	16	49.26	1957.2	96415.8	18565967							2	34.5	1864.75	64339.9	12389382							10	42.57	1161.37	49443.5	9520909
	17	52.72	112.36	5923.55	1140647		0.0689922					3	54.68	289.66	15839.6	3050106		0.138092					11	75.25	20.27	1525.08	293672		0.0260816
	18	41.21	2083.55	85858.2	16532988							4	42.3	2711.79	114704	22087519							12	45.23	1292.74	58473.4	11259728
	19	71.98	104.03	7488.45	1441987		0.104073					5	65.21	74.54	4860.3	935907		0.0480936					13	96.14	16.2	1557.58	299929		0.0157035
	20	46.38	1551.4	71953.8	13855530							6	53.45	1890.8	101059	19460111							14	64.47	1538.55	99186.7	19099530
3	1	41.8	7.98	333.6	64238		0.00564097					7	115.78	27.36	3167.3	609899		0.0307738					15	49.85	113.83	5675.02	1092791		0.0790505
	2	37.27	1586.92	59138.3	11387758							8	54.67	1882.48	102922	19818796							16	39.35	1824.46	71789.8	13823956
	3	35.51	69.57	2469.96	475619		0.039912					9	54.15	11.74	635.93	122456		0.0105196					17	66.03	50.29	3320.34	639369		0.0497007
	4	27.92	2216.24	61885.2	11916706							10	41.43	1459.29	60452.1	11640739							18	48.62	1373.96	66806.6	12864378
	5	47.67	62.28	2968.99	571713		0.0472784					11	66.88	11.1	742.34	142946		0.0126853					19	78.09	7.95	621.04	119589		0.00871139
	6	31.43	1998.1	62798	12092474							12	41.52	1409.46	58519.7	11268638							20	64.23	1109.86	71291	13727893
	7	42.38	75.68	3207.06	617556		0.0432219					13	74.67	33.59	2507.75	482896		0.0274293					21	108.37	53.31	5777.7	1112563		0.0592739
	8	30.15	2461.33	74199.8	14288027							14	54.26	1685.02	91426	17605129							22	63.26	1540.91	97474.6	18769852
	9	60.47	58.69	3548.64	683331		0.0313749					15	108.41	1.1	119.68	23045		0.00124578
	10	44.18	2560.19	113104	21779549							16	59.63	1611.08	96065	18498419
	11	37.03	158.63	5873.77	1131062		0.09359					17	100.54	103.95	10451.3	2012516		0.0971371
	12	28.37	2212.21	62760.7	12085286							18	59.08	1821.07	107593	20718298
	13	31.33	278.06	8710.37	1677282		0.114655					19	88.07	20.48	1803.65	347314		0.0192201
	14	27.86	2727.25	75970.3	14628958							20	49.91	1880.17	93841.8	18070308
	15	68.2	309.75	21123.9	4067651		0.18999
	16	33.87	3282.7	111184	21409783
	17	67.98	78.27	5320.57	1024537		0.0625612
	18	33.7	2523.35	85045.9	16376567
	19	51.85	154.09	7989.29	1538430		0.0983026
	20	38.63	2104.05	81272.4	15649942
	21	44.87	42.91	1925.46	370770		0.0274982
	22	32.66	2143.97	70021.5	13483450
	23	83.8	1.91	160	30809		0.00165447
	24	51.83	1865.89	96704.8	18621621
	25	40.82	115.99	4734.43	911669		0.0548566
	26	34.31	2515.38	86305.7	16619144
	27	51.56	30.14	1553.86	299213		0.0183281
	28	41.47	2044.25	84780	16325362
4	1	57.23	203.68	11656.2	2244537		0.079297
	2	40.37	3641.51	146994	28305442
	3	86.37	165.07	14257.5	2745451		0.0934626
	4	52.43	2909.56	152548	29374876
	5	59.15	233.42	13806.6	2658612		0.093613
	6	47.15	3127.76	147486	28400038
	7	91.97	23.5	2161.5	416221		0.0161521
	8	45.59	2935.29	133822	25768893
	9	61.75	37.47	2313.4	445471		0.0222351
	10	38.76	2684.16	104043	20034579
	11	64.72	35.62	2305.34	443919		0.0183008
	12	56.28	2238.33	125969	24256765
	13	85.57	166.61	14257.5	2745451		0.0962727
	14	49.43	2995.84	148095	28517429
	15	73.72	39.97	2946.75	567430		0.0250499
	16	53.87	2183.75	117635	22652028
	17	88.87	29.42	2614.74	503499		0.0194806
	18	50.05	2681.69	134223	25846132
	19	81.82	114.47	9366.44	1803616		0.0890513
	20	49.18	2138.49	105180	20253682

## Sheet: 27A
10307	cdc15-27A
rep1		Area	Mean	IntDen	RawIntDen		Ratio of RawIntDen		average of ratio:		rep2		Area	Mean	IntDen	RawIntDen		Ratio of RawIntDen		average of ratio:		rep3		Area	Mean	IntDen	RawIntDen		Ratio of RawIntDen		average of ratio:
1	1	119.96	72.96	8752.45	1685385		0.0680673		0.10728		1	1	54.11	150.4	8137.59	1566986		0.067935		0.106116		1	1	69.22	103.84	7188.39	1384207		0.0750785		0.111108
	2	55.33	2324.06	128585	24760585							2	43.13	2777.36	119785	23065963							2	49.13	1948.92	95744.9	18436789
	3	83.17	59.36	4937.06	950687		0.0389828					3	55.05	240.24	13224.7	2546576		0.115422					3	89.32	56.77	5070.51	976385		0.0428418
	4	55.71	2273.24	126647	24387338							4	32.33	3544.3	114578	22063269							4	67.2	1761.24	118354	22790498
	5	101.7	35.73	3634.21	699809		0.0283137					5	39.83	181.57	7232.16	1392635		0.0686156					5	66.06	206.84	13662.9	2630953		0.123168
	6	55.76	2301.76	128355	24716283							6	31.56	3339.29	105401	20296196							6	53.75	2063.83	110929	21360685
	7	88.28	261.61	23095.7	4447347		0.147414					7	60.76	411.01	24972.7	4808787		0.141182					7	87.74	75.38	6613.87	1273576		0.0518149
	8	52.39	2990.29	156672	30169037							8	47.83	3697.85	176883	34060915							8	59.58	2142.36	127644	24579339
	9	83.68	116.17	9721.13	1871916		0.0788236					9	40.14	207.23	8317.62	1601654		0.0884441					9	61.83	74.46	4603.96	886546		0.0411338
	10	46.21	2668.63	123328	23748158							10	34.24	2746.32	94043.9	18109229							10	48.33	2315.75	111926	21552724
	11	78.42	118.04	9256.49	1782443		0.0749033				2	1	84.54	52.35	4425.53	852187		0.0419517					11	96.65	49.44	4778.62	920178		0.0343541
	12	48.84	2530.47	123579	23796579							2	43.53	2423.18	105491	20313545							12	57.05	2438.33	139099	26785109
	13	61.37	72.7	4461.47	859107		0.037439					3	56.35	47.98	2703.43	520576		0.0251505					13	80.81	79.11	6393.1	1231065		0.0520126
	14	40.95	2910.19	119166	22946861							4	42.56	2525.74	107490	20698440							14	56.37	2180.43	122914	23668579
2	1	101.37	25.87	2622.64	505020		0.0248532					5	61.13	362.54	22161.5	4267460		0.148812					15	96.14	44.02	4232.19	814957		0.0321876
	2	55.06	1916.45	105525	20320141							6	47.04	3165.92	148923	28676915							16	66.77	1969.28	131485	25319008
	3	67.85	78.01	5293.14	1019255		0.0693959					7	60.72	207.45	12595.9	2425479		0.108389					17	57.38	318.74	18289.3	3521806		0.144677
	4	42.98	1774.5	76274.6	14687543							8	46.07	2522.28	116210	22377636							18	44.05	2869.9	126414	24342470
	5	66.81	83.28	5564.11	1071433		0.047862					9	57.03	414.84	23656.9	4555411		0.180032					19	99.23	397.08	39400.4	7587007		0.205688
	6	49.87	2330.89	116253	22385876							10	40.64	3233.24	131404	25303372							20	67.36	2843.73	191554	36886001
	7	54.95	257.46	14148.2	2724405		0.112195					11	43.4	357.2	15502.4	2985155		0.144958					21	104.63	54.75	5728.5	1103089		0.0469624
	8	42.4	2974.37	126104	24282757							12	33.64	3178.95	106944	20593254							22	56.59	2155.52	121981	23488752
	9	59.45	233.92	13906.7	2677894		0.137077					13	49.7	138.86	6901.03	1328872		0.0564354					23	62.64	153.49	9614.58	1851398		0.0805832
	10	39.13	2593	101452	19535686							14	40.77	2999.21	122282	23546768							24	53.72	2220.88	119313	22974995
	11	51.94	133.74	6945.89	1337510		0.0747415					15	50.55	205.28	10376.8	1998174		0.0812245				2	1	63.56	321.73	20450.3	3937935		0.15892
	12	42.03	2210.91	92932.1	17895144							16	41.96	3045.01	127755	24600618							2	45.85	2806.9	128683	24779328
	13	60.82	136.59	8307.54	1599713		0.0949154				3	1	89.35	44.98	4018.72	773851		0.0436535					3	61.41	484.42	29750.3	5728754		0.154949
	14	38.98	2245.12	87525.8	16854097							2	52.34	1758.82	92059.6	17727122							4	53.62	3580.8	192000	36971804
	15	58.95	162.37	9571.87	1843174		0.100374					3	75.9	239.97	18214.6	3507433		0.216825					5	78.45	220.87	17327	3336523		0.0860137
	16	37.35	2552.9	95361.7	18362986							4	44.75	1877.04	84005.9	16176299							6	62.28	3234.71	201445	38790589
	17	63.3	251.31	15909.2	3063499		0.151537					5	50.8	239.98	12190.6	2347440		0.15146					7	65.81	383.32	25225.4	4857441		0.17754
	18	39.73	2642.64	104986	20216192							6	41.58	1935.89	80487.1	15498710							8	54.54	2605.19	142083	27359741
	19	44.35	139.11	6169.3	1187970		0.0894943					7	36.14	182.03	6579.45	1266948		0.127181					9	96.95	438.76	42537.8	8191148		0.176979
	20	35.47	1943.24	68935.1	13274249							8	30.63	1688.73	51733	9961789							10	55.48	4332.41	240355	46283130
	21	80.02	226.43	18118	3488831		0.129816					9	80.13	263.22	21090.1	4061145		0.203024					11	76.19	432.05	32919.5	6339027		0.183228
	22	49.97	2792.81	139567	26875205							10	44.05	2358.05	103880	20003312							12	53.73	3343.93	179664	34596307
	23	59.98	60.56	3632.41	699462		0.025878					11	79.21	84.5	6692.82	1288779		0.0738151					13	77.98	263.42	20540	3955204		0.110084
	24	50.46	2781.64	140367	27029193							12	52.05	1742.12	90670.1	17459565							14	46.24	4035.13	186584	35928821
	25	112.17	162.75	18255.9	3515379		0.102092					13	61.95	87.8	5439.17	1047375		0.062147					15	97.64	260.91	25475.6	4905615		0.139026
	26	63.62	2810.89	178818	34433382							14	50.87	1720.41	87521.1	16853182							16	53.85	3402.67	183244	35285672
3	1	92.15	116.29	10716.3	2063554		0.0814924					15	116.76	52.51	6130.7	1180537		0.08177					17	75.51	298.01	22504	4333397		0.140672
	2	53.43	2461.08	131501	25322044							16	61.09	1227.35	74974.9	14437280							18	46.94	3408	159974	30804890
	3	66.79	346.9	23171	4461841		0.152601																19	55.6	518.92	28853.7	5556107		0.184667
	4	42.11	3606.15	151841	29238678																		20	41.78	3739.39	156247	30087105
	5	104.96	194.63	20429.6	3933946		0.135123																21	77.13	250.48	19318.8	3720059		0.112894
	6	58.74	2573.94	151192	29113804																		22	59.54	2874.13	171124	32951863
	7	76.34	74.91	5718.59	1101180		0.0492097
	8	49.14	2364.71	116209	22377292
	9	102.2	72.85	7445.44	1433704		0.0531442
	10	58.93	2377.51	140099	26977644
	11	76.29	190.9	14563.4	2804355		0.124917
	12	46.42	2511.71	116584	22449669
	13	67.32	20.11	1353.77	260684		0.011541
	14	48.03	2442.17	117301	22587673
	15	74.05	179.92	13323.5	2565597		0.101679
	16	45.31	2891.95	131035	25232264
	17	49.01	539.89	26461.3	5095437		0.167039
	18	39.58	4002.15	158414	30504414
5	1	106.46	326.68	34778.3	6696962		0.257915
	2	53.41	2524.63	134844	25965814
	3	73.53	426.5	31362.4	6039198		0.222276
	4	57.25	2464.61	141097	27169849
	5	56.04	70.55	3953.81	761351		0.0453664
	6	43.84	1988.19	87152.9	16782280
	7	54.93	269.42	14800	2849909		0.140302
	8	38.7	2725.81	105487	20312735
	9	57.38	366.35	21020.7	4047776		0.187048
	10	36.13	3110.57	112381	21640267
	11	115.29	186.84	21540.5	4147871		0.13133
	12	65.82	2491.8	164018	31583614
	13	57.33	75.54	4330.62	833910		0.0369682
	14	45.27	2587.46	117144	22557478
	15	86.09	281.5	24233.1	4666367		0.146931
	16	49.62	3323.79	164928	31758859
	17	78.1	126.69	9895.01	1905398		0.0952345
	18	48.51	2141.9	103902	20007444
	19	63.98	401.99	25718.9	4952466		0.185995
	20	41.47	3334.62	138277	26626902
	21	83.29	66.89	5571.24	1072807		0.0485565
	22	49.12	2336.01	114737	22094013
	23	64.92	499.81	32450.3	6248678		0.227689
	24	42.81	3329.36	142520	27443884
6	1	103.9	216.67	22512.2	4334973		0.163148
	2	58.96	2340.42	137986	26570738
	3	83.87	170.77	14322.3	2757927		0.120909
	4	48.82	2426.6	118456	22810000
	5	94.15	132.27	12453.6	2398089		0.102674
	6	55.68	2178.35	121293	23356291
	7	113.68	120.53	13702	2638484		0.0966321
	8	65.39	2168.57	141796	27304436
	9	76.58	320.68	24556.9	4728709		0.16058
	10	63.77	2398.02	152926	29447657
	11	59.9	420.8	25204.9	4853495		0.1617
	12	47.59	3275.37	155875	30015455
