# Supplementary material for: La pintura de Europa Oriental (1917-1989)
Source: eLife journal article supplement (doi:10.7554/elife.83062), 1990-01-01
Supplement: fig5-data1 [file mNG cdc15 localization Final.xlsx]

## Sheet: background
mNG-cdc15 Localization			Number of pixels per image:
			2826560
Rep 1						Rep2						Rep3
WT (1498-2)						WT (1498-2)						WT (1498-2)
SUM Background	Area	Mean	IntDen	RawIntDen		SUM Background	Area	Mean	IntDen	RawIntDen		SUM Background	Area	Mean	IntDen	RawIntDen
1	3514.34	6799.51	2.38958e+07	4601406054		1	4113.18	6488.25	2.66873e+07	5138952322		1	5090.78	5974.9	3.04169e+07	5857121579
2	3962.98	6568.44	2.60306e+07	5012489195		2	5043.75	6576.64	3.31709e+07	6387434307		2	6874.83	6047.85	4.15779e+07	8006308667
3	4439.14	6335.73	2.81252e+07	5415822794		3	5254.27	6686.35	3.51319e+07	6765045262		3	5347.84	6188.72	3.30962e+07	6373060432
4	3204.65	6255.22	2.00458e+07	3860043677		4	2391.14	6716.7	1.60606e+07	3092643694		4	6021.09	6427.32	3.86994e+07	7452020044
5	3940.07	6223.26	2.452e+07	4721615999		5	4264.8	6978.86	2.97635e+07	5731294953		5	5105.18	6227.56	3.17928e+07	6122061592
6	1750.06	6370.24	1.11483e+07	2146731780
						Average:		6689.36				Average:		6173.27
Average:		6425.4	2.22943e+07	4.29302e+09
1A (1183-3)						1A (1183-3)						1A (1183-3)
SUM Background	Area	Mean	IntDen	RawIntDen		SUM Background	Area	Mean	IntDen	RawIntDen		SUM Background	Area	Mean	IntDen	RawIntDen
1	5318.85	6054.26	3.22017e+07	6200803345		1	7261.51	6638.47	4.82053e+07	9282488691		1	3219.25	8855.74	2.85089e+07	5489710543
2	4975.06	6161.22	3.06524e+07	5902476113		2	6675.74	6778.84	4.52538e+07	8714127542		2	3684.65	6907.84	2.5453e+07	4901262130
3	4913.97	6258.89	3.0756e+07	5922420002		3	5349.72	6503.06	3.47895e+07	6699121176		3	2886.41	6666.92	1.92435e+07	3705554106
4	5788.05	6471.86	3.74595e+07	7213250697		4	6820	6621.58	4.51592e+07	8695917278		4	4610.38	6938.77	3.19904e+07	6160111045
5	4152.02	6558.12	2.72295e+07	5243343200		5	5570.04	6528.46	3.63638e+07	7002262032		5	3619.66	7104.62	2.57163e+07	4951960453
						6	5536.52	6654.05	3.68403e+07	7094012110
Average:		6300.87
						Average:		6620.74				Average:		7294.78
5A (706-2)						5A (706-2)						5A (706-2)
SUM Background	Area	Mean	IntDen	RawIntDen		SUM Background	Area	Mean	IntDen	RawIntDen		SUM Background	Area	Mean	IntDen	RawIntDen
1	5288.72	6751.73	3.5708e+07	6875977487		1	3190.77	7215.88	2.30242e+07	4433582137		1	5892.64	6471.31	3.81331e+07	7342965090
2	4654.41	6712.18	3.12412e+07	6015854868		2	3464.36	7277.34	2.52114e+07	4854737339		2	4009.72	6372.43	2.55517e+07	4920268870
3	3196.01	7038.12	2.24939e+07	4331455696		3	5194.35	7288.93	3.78613e+07	7290626026		3	4449.54	6414.1	2.85398e+07	5495663725
4	5328.02	7022.9	3.74181e+07	7205290736		4	4919.15	7298.18	3.59008e+07	6913118359		4	4166.59	6480.21	2.70004e+07	5199234542
5	1899.76	8038.48	1.52712e+07	2940635701		5	4194.22	7589.35	3.18314e+07	6129503674		5	4615.49	6878.32	3.17468e+07	6113214834
6	6773.52	6886.34	4.66448e+07	8981981042
						Average:		7333.94				Average:		6523.27
Average:		7074.96
11A						11A						11A
SUM Background	Area	Mean	IntDen	RawIntDen		SUM Background	Area	Mean	IntDen	RawIntDen		SUM Background	Area	Mean	IntDen	RawIntDen
2	4335.23	7008.19	3.03821e+07	5850428567		1	4720.22	7118.02	3.35986e+07	6469793941		1	4677.31	6702.52	3.13497e+07	6036749610
3	7335.53	6958.13	5.10416e+07	9828640935		2	2844.84	7060.43	2.00858e+07	3867751443		2	3293.67	6753.24	2.22429e+07	4283126708
4	3957.37	7005.57	27723591	5338494688		3	4245.34	6904.52	2.93121e+07	5644371203		3	4365.99	6734.71	2.94037e+07	5662016489
5	5706.51	6915.1	3.94611e+07	7598683875		4	5568.01	7071.82	3.93759e+07	7582287929		4	1561.5	6849.9	1.06961e+07	2059662731
6	5410.85	6748.6	3.65157e+07	7031516439		5	3781.91	6857.17	2.59332e+07	4993730423		5	2711.59	7212.32	1.95569e+07	3765899270
7	7795.21	7239.76	5.64354e+07	10867285959		6	3462.58	6689.88	2.31642e+07	4460535057
												Average:		6850.54
Average:		6979.22				Average:		6950.31
22A (19616)						22A (19616)						22A (19616)
SUM Background	Area	Mean	IntDen	RawIntDen		SUM Background	Area	Mean	IntDen	RawIntDen		SUM Background	Area	Mean	IntDen	RawIntDen
1	3392.07	7173.41	2.43327e+07	4685540145		1	2816.36	6948.96	1.95708e+07	3768572509		1	4059.78	6423.6	2.60784e+07	5021697910
2	1469.54	6919.56	1.01686e+07	1958076654		2	2950.25	7097.58	2.09396e+07	4032164427		2	5813.07	6337.35	3.68395e+07	7093868705
3	2870.05	6657.63	1.91077e+07	3679415167		3	5271.31	7058.25	3.72062e+07	7164480661		3	6876.62	6215.83	4.27439e+07	8230833705
4	2872.76	6517.68	1.87237e+07	3605470337		4	4663.7	7311.36	3.4098e+07	6565952454		4	5894.27	6539.04	3.85429e+07	7421870869
5	4410.05	6960.23	3.0695e+07	5910668899		5	5445.1	6836.93	3.72278e+07	7168639246		5	5149.65	6578.79	3.38785e+07	6523688197
						6	3950.84	7451.37	2.94392e+07	5668846914
Average:		6845.7
						Average:		7117.41				Average:		6418.92
31A						31A						31A
SUM Background	Area	Mean	IntDen	RawIntDen		SUM Background	Area	Mean	IntDen	RawIntDen		SUM Background	Area	Mean	IntDen	RawIntDen
1	4538.49	6718.85	3.04935e+07	5871869310		1	3603.48	6504.06	2.34373e+07	4513117808		1	3191.82	7887.67	2.5176e+07	4847933959
2	6262.79	6779.57	4.2459e+07	8175960017		2	5044.18	6360.25	3.20822e+07	6177797490		2	4501.06	8170.45	3.67756e+07	7081571699
3	4373.98	6782.68	2.96673e+07	5712775201		3	5764.74	6422.2	3.70223e+07	7129069909		3	2480.61	8140.38	2.01931e+07	3888416102
4	4546.73	6633.3	3.01598e+07	5807618408		4	5105.68	6226.64	3.17913e+07	6121772710		4	3299.75	7697.83	2.54009e+07	4891231631
5	4631.15	6731.32	3.11737e+07	6002854026		5	6052.47	6394.3	3.87013e+07	7452380895		5	3577.82	7954.27	2.8459e+07	5480104110
6	3256.34	6878.34	2.23982e+07	4313027434		6	6499.37	6579.01	4.27594e+07	8233819963
												Average:		7970.12
Average:		6754.01				Average:		6414.41
11A Final						11A Final						11A Final
SUM Background	Area	Mean	IntDen	RawIntDen		SUM Background	Area	Mean	IntDen	RawIntDen		SUM Background	Area	Mean	IntDen	RawIntDen
1	7095.08	7630.87	5.41416e+07	10425579683		1	4004.12	7220.86	2.89132e+07	5567575434		1	2896.82	7830.51	2.26836e+07	4367985309
2	3957.19	7025.12	2.77997e+07	5353153003		2	4047.01	7273.4	2.94356e+07	5668153205		2	2420.49	8159.15	1.97492e+07	3802933106
3	6874.63	7486.26	5.14653e+07	9910225128		3	6596.63	7597.4	5.01172e+07	9650642571		3	3465.36	7378.27	2.55684e+07	4923478375
4	4278.37	7244.48	3.09946e+07	5968368662		4	4044.79	7096.55	2.87041e+07	5527294005		4	3373.97	7513.16	2.53492e+07	4881278938
						5	4246.98	7206.18	3.06045e+07	5893251230		5	3354.74	7872.95	2.64117e+07	5085871037
Average:		7346.68
						Average:		7278.88				Average:		7750.81

## Sheet: WT
1498-2	cdc15
rep1			Area	Mean	IntDen	RawIntDen		Ratio of RawIntDen			average of ratio:
1	1	0	0	0	0			0			0.00144849
		0	0	0	0
	2	0	0	0	0			0
		0	0	0	0
	3	1	51.02	7.41	378.08	72804		0.00407107
		2	34.52	2690.43	92870.5	17883275
	4	3	45.15	3.84	173.45	33399		0.00188703
		4	34.47	2666.75	91914.6	17699205
	5	5	69.75	0	0	0		0
		6	37	3437.99	127192	24492242
	6	7	50.55	0.55	27.8	5353		0.000220936
		8	40.7	3091.58	125823	24228736
	7	9	47.91	1.24	59.31	11421		0.000623755
		10	30.95	3072.16	95087	18310085
	8	11	49.36	0.62	30.4	5853		0.000312933
		12	36.42	2666.62	97130.9	18703668
	9	13	61.93	0.46	28.78	5542		0.000207413
		14	40.89	3393.83	138759	26719610
	10	15	90.96	0	0	0		0
		16	44.32	2179.93	96622	18605683
	11	17	43.84	5.72	250.85	48304		0.00249062
		18	34.34	2932.76	100718	19394374
	12	19	62.73	0	0	0		0
		20	41.18	3018.02	124272	23929913
2	13	0	0	0	0	0		0
			0	0	0	0
	14		0	0	0	0		0
			0	0	0	0
	15	1	43.41	0	0	0		0
		2	37.48	2316.13	86818.2	16717835
	16	3	51.56	1.14	58.6	11285		0.000460877
		4	42.5	2992.29	127159	24485903
	17	5	62.23	22.86	1422.99	274013		0.0139074
		6	34.04	3006.2	102319	19702652
	18	7	48.78	3.19	155.65	29972		0.00172727
		8	32.43	2778.58	90112.8	17352253
	19	9	67.3	2.85	192.08	36988		0.00165595
		10	39.74	2918.64	115996	22336376
	20	11	46.94	0.42	19.76	3805		0.000210701
		12	36.68	2556.44	93781.6	18058724
	21	13	44.2	5.86	259.04	49882		0.00325631
		14	29.8	2669.67	79551.5	15318555
	22	15	90.98	0	0	0		0
		16	45.91	2786.83	127951	24638355
	23	17	48.04	0.4	18.99	3657		0.000173764
		18	35.18	3106.85	109294	21045825
	24	19	50.17	1.21	60.51	11651		0.00058219
		20	40.38	2573.94	103927	20012352
	25	21	84.36	1.53	129.17	24873		0.00115903
		22	42.34	2632.18	111446	21460127
	26	23	53.47	8.13	434.73	83713		0.00471345
		24	31.04	2971.46	92232.6	17760439
Rep 2
file			Area	Mean	IntDen	RawIntDen		Ratio of RawIntDen			average ratio:
2			0	0	0	0		0			0.00260284
			0	0	0	0
			0	0	0	0		0
			0	0	0	0
		1	67.61	0.7	47.22	9092		0.000312641
		2	54.09	2791.98	151023	29081260
		3	54.47	25.4	1383.42	266393		0.0101153
		4	46.55	2937.95	136765	26335762
		5	48.03	12.85	616.98	118806		0.00496631
		6	41.74	2976.53	124233	23922408
		7	57.44	0.31	17.6	3390		0.000169726
		8	46.59	2226.19	103725	19973407
		9	46.92	4.09	191.77	36928		0.00150584
		10	40.85	3117.22	127352	24523137
		11	64.71	0.21	13.75	2647		0.000104369
		12	51.6	2552.52	131708	25361824
		13	50.19	0	0	0		0
		14	41.63	2452.09	102089	19658393
		15	60.89	0	0	0		0
		16	49.27	2394.41	117979	22718156
		17	46.24	0.39	18.19	3502		0.000169265
		18	40.81	2632.92	107443	20689468
		19	73.61	1.65	121.4	23376		0.000768839
		20	60.1	2627.4	157894	30404303
3			0	0	0	0		0
			0	0	0	0
		1	54.2	16.21	878.49	169163		0.00696287
		2	46.02	2741.48	126168	24295013
		3	40.86	2.92	119.49	23009		0.00145341
		4	36.32	2263.52	82212.8	15831025
		5	56.02	0	0	0		0
		6	47.58	2154.21	102508	19739046
		7	40.22	4.52	181.83	35013		0.00268568
		8	33.56	2017.48	67702.7	13036934
		9	86.28	0.79	68.26	13145		0.00043593
		10	65.19	2401.94	156594	30153909
		11	66.26	21.98	1456.19	280406		0.0116642
		12	50.31	2481.67	124843	24039899
		13	59.15	0	0	0		0
		14	47.92	1850.36	88664.2	17073303
		15	61.69	6.29	387.78	74672		0.00285504
		16	53.99	2515.58	135824	26154469
		17	51.98	11.02	572.91	110321		0.00633171
		18	44.01	2056.12	90483.2	17423572
		19	49.01	16.84	825.19	158900		0.00936414
		20	39.83	2212.67	88122.4	16968982
Rep 3
file			Area	Mean	IntDen	RawIntDen		Ratio of RawIntDen			average ratio:
1	1		0	0	0	0		0			0.000393544
			0	0	0	0
	2		0	0	0	0		0
			0	0	0	0
	3		0	0	0	0		0
			0	0	0	0
	4		0	0	0	0		0
			0	0	0	0
	5	1	64.27	0	0	0		0
		2	46.86	2801.69	131281	25279665
	6	3	61.18	1.29	78.99	15210		0.00064835
		4	33.12	3678.78	121829	23459569
	7	5	105.08	0.14	14.3	2754		9.79922e-05
		6	52.07	2802.86	145950	28104270
	8	7	62.26	3.42	213.05	41025		0.00174181
		8	33.49	3652.78	122315	23553145
	9	9	43.81	0.57	25.03	4819		0.000267947
		10	28.44	3283.72	93398.3	17984909
2	10		0	0	0	0		0
			0	0	0	0
	11		0	0	0	0		0
			0	0	0	0
	12		0	0	0	0		0
			0	0	0	0
	13		0	0	0	0		0
			0	0	0	0
	14		0	0	0	0		0
			0	0	0	0
	15	1	78.16	1.18	91.95	17706		0.000640262
		2	49.27	2914.66	143613	27654297
	16	3	66.84	3.26	217.89	41958		0.00207811
		4	39.58	2648.97	104852	20190417
	17	5	45.48	0.4	18.07	3480		0.000221407
		6	36.52	2235.17	81624.3	15717691
3	18		0	0	0	0		0
			0	0	0	0
		1	70.74	1.05	74.54	14353		0.000701072
		2	40.49	2625.74	106319	20472930
		3	52.69	5.05	266.14	51248		0.00250096
		4	38.62	2755.7	106415	20491350
		5	73.9	0	0	0		0
		6	39.11	2184.49	85446	16453604
		7	75.7	0.23	17.35	3341		0.000153599
		8	41.93	2694.01	112958	21751422
		9	42.59	0	0	0		0
		10	35.26	2115.96	74600.7	14365221

## Sheet: 1A
1183-3	cdc15-1A
rep1			Area	Mean	IntDen	RawIntDen		Ratio of RawIntDen			average of ratio:
2			0	0	0	0		0			0.000671413
			0	0	0	0
			0	0	0	0		0
			0	0	0	0
			0	0	0	0		0
			0	0	0	0
			0	0	0	0		0
			0	0	0	0
		1	41.75	1.78	74.22	14292		0.000845226
		2	35.24	2492.13	87811.4	16909085
		3	91.75	0	0	0		0
		4	43.94	2238.75	98368.8	18942041
		5	51.8	0	0	0		0
		6	35.47	2309.27	81907.8	15772289
		7	67.02	1.04	69.72	13426		0.000777887
		8	36.51	2454.78	89631.5	17259578
		9	47.56	1.36	64.77	12472		0.000722376
		10	35.61	2517.53	89661	17265250
		11	50.87	9.1	462.79	89116		0.00554368
		12	31.15	2679.65	83481.1	16075241
		13	70.46	0.35	24.35	4688		0.000273865
		14	37.87	2347.49	88895.7	17117893
		15	42.53	0.46	19.61	3776		0.000218219
		16	35.15	2556.31	89860.6	17303690
		17	59.07	2.36	139.46	26854		0.00122711
		18	38.61	2943.38	113647	21883999
		19	60.53	1.1	66.67	12838		0.000590995
		20	36.18	3117.94	112809	21722671
3			0	0	0	0		0
			0	0	0	0
			0	0	0	0		0
			0	0	0	0
			0	0	0	0		0
			0	0	0	0
			0	0	0	0		0
			0	0	0	0
		1	45.57	1.43	65.12	12539		0.000577548
		2	38.21	2951.03	112747	21710761
		3	55.3	5.24	289.62	55769		0.0026536
		4	37.12	2940.59	109141	21016364
		5	53.47	4.19	224.07	43148		0.00221926
		6	35.31	2859.62	100968	19442560
		7	61.69	1.9	117.17	22562		0.00119272
		8	38.57	2546.64	98236	18916468
		9	61.57	0.45	27.45	5285		0.000316414
		10	39.1	2218.17	86740.2	16702814
		11	66.99	0.53	35.58	6851		0.000300828
		12	42.81	2762.47	118268	22773816
		13	84.16	0.19	16.32	3143		0.000140811
		14	45.09	2570.92	115915	22320744
		15	91.02	0.68	61.66	11874		0.000509402
		16	46.82	2585.66	121051	23309700
		17	77.77	0.43	33.14	6381		0.000322055
		18	42.53	2419.21	102894	19813365
		19	60.49	0.56	33.98	6543		0.000367565
		20	34.75	2660.43	92442.8	17800919
rep2			Area	Mean	IntDen	RawIntDen		Ratio of RawIntDen			average of ratio:
1			0	0	0	0		0			0.00173308
			0	0	0	0
		1	50.15	11.96	599.84	115507		0.00596234
		2	41.39	2430.41	100606	19372776
		3	57.33	5.55	317.97	61229		0.00325923
		4	42.07	2319.01	97560.1	18786315
		5	97.43	0.21	20.49	3946		0.000175019
		6	52.53	2228.76	117085	22546152
		7	66.16	2.27	149.95	28874		0.00139262
		8	39.44	2730.27	107673	20733652
		9	61.37	4.48	274.72	52901		0.00246471
		10	37.72	2954.76	111462	21463352
		11	46.13	25.45	1173.94	226055		0.0101594
		12	38.12	3031.44	115551	22250755
		13	68.46	0.76	52.06	10024		0.000606356
		14	49.43	1736.87	85850.8	16531548
2			0	0	0	0		0
			0	0	0	0
		1	65.52	3.72	244.03	46991		0.00259857
		2	39.92	2352.46	93909.6	18083380
		3	71.1	0.57	40.41	7781		0.000340244
		4	51.29	2315.6	118761	22868878
		5	77.69	1.27	98.82	19029		0.00107493
		6	43.68	2104.45	91932.2	17702596
		7	59.98	0	0	0		0
		8	51.37	2188.89	112433	21650359
		9	58	0.95	55.31	10650		0.000529127
		10	45.98	2273.27	104525	20127503
		11	79.68	1.58	125.93	24249		0.00121893
		12	44.6	2316.46	103311	19893734
		13	74.37	2.51	186.9	35989		0.00124383
		14	60.25	2493.89	150259	28934126
3		1	57.89	0.35	20.12	3874		0.000211131
		2	48.41	1968.33	95287.9	18348781
		3	47.86	11.61	555.42	106952		0.00673459
		4	38.41	2146.95	82472.3	15880996
		5	109.82	0.52	57.26	11027		0.000421912
		6	59.92	2265.19	135727	26135789
		7	87.83	1.65	145.33	27985		0.00103457
		8	56.97	2465.58	140474	27049919
		9	128.25	0	0	0		0
		10	69.61	1811.04	126065	24275222
		11	84.32	0.55	46.21	8899		0.000433254
		12	51.41	2074.95	106667	20539914
		13	84.6	0	0	0		0
		14	53.93	2194.07	118317	22783208
rep3			Area	Mean	IntDen	RawIntDen		Ratio of RawIntDen			average of ratio:
1			0	0	0	0		0			0.000560947
			0	0	0	0
			0	0	0	0		0
			0	0	0	0
			0	0	0	0		0
			0	0	0	0
		1	85.49	0.95	80.89	15577		0.00121555
		2	43.05	1546	66549.1	12814791
		3	58.94	5.79	341.37	65735		0.00454868
		4	31.64	2371.81	75048.5	14451444
		5	62.4	2.46	153.5	29559		0.00205979
		6	36.81	2024.33	74524.1	14350470
		7	55.8	0	0	0		0
		8	35.23	2355.64	82989.9	15980658
2			0	0	0	0		0
			0	0	0	0
			0	0	0	0		0
			0	0	0	0
			0	0	0	0		0
			0	0	0	0
		1	57.49	0	0	0		0
		2	34.31	1561.72	53584.3	10318270
		3	51.85	0.58	30.16	5808		0.000711811
		4	30.7	1380.39	42373.3	8159472
		5	52.36	0.27	14.3	2754		0.000230702
		6	36.78	1685.61	61993.2	11937498
		7	46.63	0	0	0		0
		8	28.53	1753.49	50020	9631930
3			0	0	0	0		0
			0	0	0	0
			0	0	0	0		0
			0	0	0	0
			0	0	0	0		0
			0	0	0	0
		1	67.44	0	0	0		0
		2	32.17	1389.8	44704.7	8608409
		3	76.96	0.3	23.25	4477		0.000427039
		4	37.93	1435.35	54444	10483824
		5	51.3	1.23	63.31	12192		0.0011073
		6	28.91	1978.18	57179.5	11010562
		7	61.18	0.76	46.44	8942		0.000709212
		8	36.71	1783.61	65477.1	12608363
		9	81.75	1.1	90.01	17333		0.00133075
		10	42.31	1598.75	67640.7	13024993

## Sheet: 5A
706-2	cdc15-5A
Rep 2
file			Area	Mean	IntDen	RawIntDen		Ratio of RawIntDen			average of ratio:
1		1	75.49	19.06	1438.97	277090		0.0100319			0.00821404
		2	48.92	2932.15	143439	27620835
		3	61.9	6.04	373.91	72000		0.00289112
		4	40.63	3183.01	129329	24903858
		5	64.96	53.68	3487.05	671472		0.0262031
		6	38.36	3469.49	133078	25625656
		7	69.74	5.8	404.33	77858		0.0031516
		8	43.99	2916.68	128293	24704279
		9	47.01	4.25	199.81	38475		0.00170604
		10	40.89	2864.13	117117	22552186
		11	43.2	4.45	192.36	37042		0.00187662
		12	35.24	2909.16	102506	19738665
		13	82.91	5.66	469.43	90394		0.00379211
		14	46.2	2679.26	123791	23837398
		15	65.31	12.64	825.56	158971		0.00733272
		16	38.91	2893.32	112586	21679680
		17	70.89	9.16	649.15	125001		0.00596812
		18	38.98	2790.03	108769	20944780
		19	74.78	11.25	840.99	161942		0.00642931
		20	46.88	2789.99	130805	25188073
2		1	48.35	36.34	1756.87	338306		0.0203085
		2	36.66	2359.54	86509.2	16658337
		3	65.06	2.52	164.22	31622		0.00158857
		4	41.63	2483.28	103375	19905966
		5	42.63	7.01	298.94	57565		0.00268924
		6	36.98	3006.41	111163	21405647
		7	76.29	44.36	3384	651628		0.0129989
		8	58.45	4453.59	260330	50129601
		9	65.81	21.98	1446.55	278549		0.0108774
		10	43.75	3039.88	132986	25607936
		11	72.11	10.99	792.48	152601		0.00603827
		12	39.17	3350.87	131243	25272286
		13	79.85	25.44	2031.52	391192		0.0165528
		14	41.46	2960.41	122730	23632987
		15	70.69	13.21	933.6	179775		0.00656629
		16	47.88	2969.79	142180	27378476
		17	53.03	8.76	464.36	89418		0.00418163
		18	40.56	2737.97	111048	21383508
		19	59.46	18.57	1103.86	212560		0.0130965
		20	34.12	2470.36	84286.2	16230270
Rep 3
file			Area	Mean	IntDen	RawIntDen		Ratio of RawIntDen			average of ratio:
1		1	51.04	18.35	936.61	180355		0.00716723			0.00319071
		2	32.89	3973.45	130680	25163853
		3	45.2	23.16	1047	201612		0.00763983
		4	34.58	3962.99	137045	26389580
		5	86.28	1.97	170.3	32793		0.00118329
		6	44.05	3267.31	143919	27713320
		7	61.07	27.87	1701.89	327719		0.0114263
		8	39.65	3756.04	148945	28681104
		9	94.54	1.05	99.56	19171		0.000998024
		10	42.95	2322.73	99755	19208962
		11	56.79	12.7	721.07	138850		0.00656035
		12	39.51	2781.58	109913	21165043
		13	55.84	4.17	233.01	44868		0.00198838
		14	38.03	3080.98	117184	22565124
		15	56.03	3.05	170.89	32907		0.00133988
		16	45.18	2822.94	127542	24559590
2		1	61.69	0.82	50.63	9749		0.000549165
		2	40.56	2272.75	92190.9	17752420
		3	71.54	0	0	0		0
		4	48.8	2076.61	101339	19513911
		5	80.42	5.51	443.34	85371		0.00368976
		6	50.03	2401.63	120155	23137278
		7	66.38	1.95	129.29	24896		0.0011176
		8	46.8	2471.85	115684	22276294
		9	71.53	1.9	135.73	26137		0.00134372
		10	41.44	2437.8	101013	19451202
		11	71.76	5.73	411.13	79167		0.0038836
		12	42.01	2519.77	105862	20384963
		13	57.24	0.86	48.99	9434		0.000421613
		14	43.81	2652.44	116202	22375973
		15	90.49	1.09	98.26	18921		0.000992017
		16	51.6	1919.42	99050.3	19073269
		17	56.67	0.3	16.9	3255		0.000171654
		18	48.16	2044.7	98475.1	18962519
3		1	82.24	1.38	113.24	21806		0.000962659
		2	46.31	2540.3	117634	22651854
		3	80.62	4.07	327.76	63114		0.00289767
		4	43.72	2587.11	113111	21780913
		5	50.88	2	101.76	19595		0.00122522
		6	39.35	2110.74	83054.2	15993048
		7	61.21	14.84	908.32	174907		0.0115126
		8	40.62	1942.29	78897.4	15192594
		9	60.78	2	121.34	23366		0.00121424
		10	39.15	2552.84	99933.5	19243339
		11	74.1	8.13	602.36	115992		0.00578008
		12	50.5	2063.5	104214	20067547
		13	54.93	3.35	183.88	35408		0.00251214
		14	32.2	2272.98	73196	14094731
Rep 4
file			Area	Mean	IntDen	RawIntDen		Ratio of RawIntDen			average of ratio:
1	1	1	77.69	0	0	0		0			0.00850185
		2	51.72	2500.58	129339	24905756
	2	3	47.3	7.16	338.71	65222		0.00385009
		4	31.11	2827.64	87973.9	16940385
	3	5	72.63	8.51	618.26	119053		0.00625015
		6	41.51	2382.79	98919.2	19048034
	4	7	49.85	46.74	2330.36	448737		0.0220854
		8	39.88	2645.95	105516	20318230
	5	9	52.04	33.9	1764.05	339688		0.0144071
		10	44.33	2761.85	122443	23577890
	6	11	61.69	4.07	250.9	48313		0.00194199
		12	50.17	2575.1	129196	24878087
	7	13	106.87	5.28	564.4	108681		0.00439441
		14	51.78	2480.36	128435	24731642
2	8	1	70.51	2.51	177.05	34093		0.00187015
		2	40.87	2316.4	94671.6	18230103
	9	3	95.35	9.28	884.69	170357		0.00614074
		4	50.86	2832.56	144069	27742079
	10	5	74	28.59	2115.72	407406		0.0163085
		6	43.39	2989.62	129731	24981256
	11	7	81.76	11.71	957.42	184362		0.00843412
		8	44.93	2526.48	113517	21859064
	12	9	65.43	18.02	1179.02	227034		0.0112818
		10	38.22	2734.24	104507	20123990
	13	11	73.21	4.25	311.21	59927		0.00322873
		12	43.78	2201.46	96387.6	18560533
3	14	1	104.64	14.42	1508.91	290558		0.00941339
		2	58.07	2760.37	160294	30866456
	15	3	86.04	7.15	615.55	118531		0.00444736
		4	45.36	3051.52	138408	26652001
	16	5	69.27	25.2	1745.81	336175		0.012919
		6	39.34	3435.22	135135	26021764
4	18	1	56.26	7.58	426.2	82069		0.00449549
		2	42.92	2209.08	94805.2	18255834
	19	3	59.79	42.95	2568.06	494509		0.0242885
		4	37.65	2808.64	105731	20359810
	20	5	49.33	25.31	1248.76	240464		0.0131981
		6	35.62	2656.3	94616.8	18219547
	21	7	67.4	12.57	847.01	163101		0.00699507
		8	42.71	2834.84	121086	23316565
	22	9	69.67	12.12	844.53	162623		0.00692322
		10	43.52	2803.05	121985	23489520
	23	11	93.57	6.79	635.69	122409		0.00416755
		12	53.89	2830.21	152533	29371951

## Sheet: 11A
cdc15-11A
rep1	Image	Area	Mean	IntDen	RawIntDen		Ratio of RawIntDen				average of ratio:
1	1	60.74	0	0	0		0				0.00922266
	2	52.72	2022.83	106645	20535806
	3	61.04	3.8	231.84	44643		0.00237525
	4	48.47	2013.61	97605.6	18795074
	5	65.23	7.01	457.43	88084		0.00390481
	6	51.16	2289.67	117146	22557834
	7	51.88	21.38	1109.16	213581		0.0116826
	8	41	2315.64	94941.2	18282016
	9	57.91	12.97	751.42	144695		0.00533922
	10	50.85	2767.6	140736	27100382
	11	69.41	16.79	1165.34	224399		0.00772497
	12	54.3	2778.17	150853	29048539
	13	48.67	90.92	4425.33	852149		0.0435754
	14	37.7	2693.63	101556	19555719
	15	81.61	4.72	385.46	74224		0.00257238
	16	64.13	2336.56	149844	28854209
	17	63.21	1.58	99.77	19212		0.000902901
	18	50.81	2174.78	110500	21278092
2	1	54.11	28.22	1527.16	294072		0.0175208
	2	41.36	2107.24	87162.7	16784185
	3	56.17	1.75	98.49	18965		0.00105757
	4	48.27	1929.48	93126.7	17932617
	5	50.5	23.02	1162.32	223819		0.0122757
	6	42.73	2215.94	94685.3	18232739
	7	80.17	2.63	210.99	40628		0.00173013
	8	61.64	1978.31	121949	23482593
	9	57.33	1.92	109.8	21144		0.00108229
	10	48.63	2086.33	101455	19536407
	11	55.9	14.71	822.54	158389		0.00776384
	12	45.72	2317.49	105945	20400851
	13	54.53	7.61	415.01	79914		0.00508905
	14	43.57	1871.65	81548.6	15703127
	15	54.53	19.79	1079.11	207795		0.0118003
	16	43.55	2099.6	91447.9	17609338
	17	38.96	109.96	4284.66	825061		0.0537016
	18	32.79	2433.29	79786.5	15363800
	19	86.81	0	0	0		0
	20	67.81	1840.44	124804	24032427
	21	65.93	2.64	173.83	33472		0.00149124
	22	55.29	2108.18	116564	22445772
4	1	68.1	3.77	256.74	49439		0.00266944
	2	50.75	1895.05	96178.9	18520357
	3	65.07	4.42	287.84	55426		0.00246376
	4	56.31	2074.75	116828	22496513
	5	49.06	19.01	932.57	179578		0.00964562
	6	41.22	2345.37	96683.8	18617578
	7	57.33	38.76	2222.27	427924		0.0270967
	8	38.78	2114.97	82012.7	15792486
	9	66.93	3.64	243.67	46922		0.00229812
	10	52.63	2014.56	106031	20417524
rep2	Image	Area	Mean	IntDen	RawIntDen		Ratio of RawIntDen
1	1	64.41	12.08	778.28	149867		0.00919773
	2	39.55	2139.71	84616.7	16293910
	3	107.02	1.95	209.11	40266		0.00187584
	4	61.45	1814.19	111474	21465533
	5	99.73	1.14	113.39	21835		0.00114569
	6	57.15	1731.8	98973.2	19058422
	7	74.7	8.44	630.84	121476		0.00727916
	8	44.5	1947.51	86664.2	16688181
	9	92.83	1.47	136.14	26216		0.00132787
	10	54.93	1866.42	102528	19742952
	11	90.05	2.71	243.8	46947		0.0020441
	12	55.28	2157.55	119272	22967110
2	1	91.06	2.16	196.52	37843		0.00184647
	2	61.55	1729.08	106433	20494815
	3	75.7	3.28	248.22	47797		0.00359414
	4	49.29	1401.03	69061.5	13298590
	5	78.42	1.39	109.07	21002		0.00154766
	6	47.87	1472.3	70472.1	13570204
	7	57.8	17.28	998.71	192314		0.0124452
	8	36.45	2201.58	80249	15452859
	9	100.33	1.41	141.01	27153		0.00178197
	10	59.13	1338.27	79131	15237590
	11	82.61	17.29	1428.63	275099		0.0159874
	12	49.64	1800.29	89359.6	17207216
	13	53.5	29.51	1578.91	304038		0.024863
	14	35.26	1800.96	63504.6	12228545
3	1	81.79	7.52	614.77	118381		0.00648963
	2	53.58	1767.94	94731.1	18241561
	3	62.05	45.18	2803.29	539806		0.0296713
	4	39.91	2367.02	94478.3	18192886
	5	63.9	11.72	749.1	144248		0.00825521
	6	41.8	2170.63	90742.8	17473568
	7	75.34	13.98	1053.04	202774		0.0106229
	8	45.62	2173.09	99128.9	19088408
	9	71.01	15.79	1121.13	215887		0.0105344
	10	47.05	2261.97	106426	20493468
	11	69.28	12.77	884.9	170397		0.0089522
	12	47.31	2089.36	98846.8	19034091
	13	73.12	10.1	738.76	142257		0.0068151
	14	52.77	2054.1	108401	20873808
	15	65.01	58.55	3806.36	732959		0.0395629
	16	42.51	2263.19	96210.5	18526433
	17	106.19	19.91	2114.68	407206		0.0130272
	18	60.95	2663.21	162328	31258056
	19	73.69	20.55	1514.66	291665		0.0122819
	20	44.57	2766.81	123324	23747498
rep3	Image	Area	Mean	IntDen	RawIntDen		Ratio of RawIntDen
1	1	61.18	0.32	19.47	3750		0.000235621
	2	46.36	1782.83	82650.8	15915358
	3	85.63	0.31	26.24	5053		0.000230147
	4	62.64	1820.22	114018	21955530
	5	48.61	8.5	413.19	79565		0.00493819
	6	40.18	2082.48	83672.9	16112183
	7	119.23	1.1	131.14	25252		0.00129945
	8	56.38	1789.89	100918	19432829
		0	0	0	0		0
		0	0	0	0
		0	0	0	0		0
		0	0	0	0
2	1	74.86	22.54	1687.73	324991		0.0179635
	2	43.42	2163.83	93953.1	18091748
	3	115.96	7.15	828.78	159591		0.00753311
	4	57.6	1909.96	110018	21185281
	5	51.04	2.1	107.08	20619		0.00117852
	6	42.55	2135.18	90857.4	17495631
	7	76.87	1.07	82.12	15814		0.000879246
	8	46.19	2022.02	93403.3	17985875
	9	77.71	77.4	6014.9	1158238		0.0567821
	10	48.25	2195.21	105929	20397929
	11	74.94	36.18	2711.29	522090		0.0307185
	12	45.23	1951.54	88262.4	16995940
	13	112.3	0.58	64.83	12483		0.000931737
	14	56.48	1231.96	69575.5	13397562
	15	76.34	0.32	24.26	4671		0.000431892
	16	43.33	1296.32	56165	10815209
3	1	58.99	22.56	1331.1	256319		0.0166722
	2	50.24	1589.22	79839.8	15374077
	3	81.52	4.51	367.34	70735		0.0046817
	4	54.2	1447.76	78462.4	15108833
	5	110.65	10.69	1182.79	227759		0.0101115
	6	70.91	1649.55	116974	22524638
	7	68.02	0.62	42.48	8180		0.000638168
	8	56.18	1184.87	66565.4	12817936
	9	66.42	2.88	191.26	36829		0.00270447
	10	47.18	1498.77	70719.3	13617819
	11	64.92	12.08	784.02	150973		0.00795355
	12	45.58	2162.93	98575.4	18981833
	13	57.44	45.17	2594.47	499594		0.0295104
	14	42.97	2046.1	87916.9	16929409
	15	65.15	1.44	93.5	18005		0.0013889
	16	43.74	1539.05	67321.1	12963450
	17	51.84	2.52	130.55	25138		0.00214375
	18	43.24	1408.21	60895.8	11726188
	19	92.85	1.39	129.39	24916		0.00161829
	20	51.24	1560.56	79956.4	15396532
	21	57.64	6.78	390.81	75255		0.00579662
	22	41.19	1636.73	67420.3	12982560

## Sheet: 22A
19616	cdc15-22A
rep1			Area	Mean	IntDen	RawIntDen		Ratio of RawIntDen			average of ratio:
1		1	46.27	155.05	7174.12	1381459		0.0677645			0.0864735
		2	38.17	2773.63	105868	20386182
		3	80.42	46.8	3763.25	724657		0.0273647
		4	50.89	2702.19	137522	26481455
		5	87.08	78.38	6825.49	1314326		0.0566685
		6	48.02	2508.19	120446	23193228
		7	59.86	353.36	21150.6	4072793		0.180279
		8	34.47	3403.38	117322	22591656
		9	61.32	239.43	14681.9	2827168		0.131568
		10	34.84	3202.89	111591	21488184
		11	57.96	204.3	11840.3	2279994		0.0940833
		12	46.05	2732.72	125850	24233787
		13	57.21	169.19	9678.86	1863775		0.0640239
		14	44.93	3365	151176	29110592
		15	54.57	294.04	16045.4	3089720		0.112177
		16	39.5	3620.79	143037	27543351
		17	57.69	39.19	2261.17	435414		0.0209594
		18	47.01	2294.73	107883	20774149
		19	53.09	233.95	12421.4	2391874		0.0993092
		20	40.47	3091.01	125078	24085120
3		1	49.88	101.71	5073.28	976919		0.0656461
		2	34.38	2247.98	77282.3	14881596
		3	40.51	146.32	5926.94	1141300		0.0760362
		4	33.03	2359.68	77948.9	15009950
		5	49.44	129.69	6411.58	1234624		0.0642684
		6	40.17	2483.57	99762.6	19210440
		7	68.2	69.1	4712.37	907420		0.042802
		8	41.68	2641.8	110097	21200406
		9	88.15	35.49	3128.15	602361		0.0309138
		10	50.3	2011.89	101189	19485151
		11	41.82	163.86	6851.77	1319387		0.0749523
		12	34.61	2641.11	91415	17603015
		13	48.61	182.52	8871.9	1708386		0.0792901
		14	42.03	2661.97	111892	21546023
4		1	49.73	278.92	13870.5	2670925		0.112631
		2	33.37	3690.89	123150	23713938
		3	59.41	295.37	17547.8	3379023		0.139359
		4	36.82	3419.38	125917	24246817
		5	72.91	100.54	7330.46	1411564		0.0615153
		6	42.51	2803.49	119165	22946553
		7	43.72	630.29	27553.8	5305792		0.229348
		8	34.77	3455.45	120139	23134225
		9	74.1	110.73	8204.62	1579894		0.0714566
		10	42.52	2700.61	114820	22109854
Rep2
file			Area	Mean	IntDen	RawIntDen		Ratio of RawIntDen			average of ratio:
1		1	74.16	120.01	8899.45	1713691		0.067122			0.0815666
		2	45.99	2883.23	132586	25530984
		3	56.7	130.78	7415.02	1427848		0.0500866
		4	36.65	4039.62	148044	28507589
		5	74.5	100.77	7507.3	1445616		0.0525423
		6	48.23	2962.25	142881	27513390
		7	60.55	101.35	6136.48	1181650		0.0499093
		8	39.27	3130.91	122953	23675963
		9	50.91	227.27	11571.4	2228202		0.107816
		10	34.73	3090.13	107326	20666801
		11	87.87	155.79	13688.7	2635911		0.0771083
		12	51.28	3461.72	177525	34184516
		13	73.58	153.65	11304.9	2176888		0.0578247
		14	54.86	3563.98	195503	37646357
		15	78.38	166.89	13080.8	2518861		0.102153
		16	42.63	3003.73	128051	24657617
		17	87.83	244.58	21480.7	4136345		0.119087
		18	51.93	3473.73	180378	34733874
		19	61.1	145.26	8875.81	1709139		0.0703426
		20	38.87	3246.14	126180	24297353
3		1	58.27	105.47	6145.24	1183337		0.0558537
		2	45.88	2398.01	110024	21186375
		3	60.05	167.21	10041.8	1933664		0.0867272
		4	40.56	2854.79	115786	22295936
		5	100.33	82.29	8256.56	1589895		0.0649595
		6	57.29	2218.56	127103	24475161
		7	92.27	46.12	4255.02	819353		0.0335576
		8	55.48	2285.53	126797	24416311
		9	60.68	102.95	6246.9	1202912		0.0686026
		10	40.14	2268.37	91059.2	17534485
4		1	99.82	87.4	8723.85	1679877		0.0655802
		2	57.59	2309.79	133026	25615621
		3	81.12	167.36	13576.5	2614311		0.0930512
		4	47.5	3071.54	145904	28095404
		5	91.69	178.54	16369.8	3152190		0.0868607
		6	54.13	3481.41	188460	36290172
		7	61.43	479.85	29479.4	5676591		0.165663
		8	49.11	3623.33	177948	34265852
		9	82.94	130.29	10807.3	2081068		0.0855602
		10	48.02	2630.35	126312	24322857
		11	104.36	286.57	29907.3	5758998		0.147222
		12	55.81	3639.87	203144	39117664
		13	53.87	207.79	11194.2	2155563		0.0868348
		14	39.18	3290.53	128913	24823726
Rep3
file			Area	Mean	IntDen	RawIntDen		Ratio of RawIntDen			average of ratio:
1		1	58.81	146.78	8632.01	1662192		0.0776966			0.0516699
		2	44.9	2474.36	111099	21393359
		3	69.17	80.92	5597.27	1077818		0.0489909
		4	40.85	2796.9	114251	22000379
		5	62.84	72.4	4549.53	876064		0.0458173
		6	37.48	2649.41	99297.2	19120817
		7	68.42	49.5	3386.46	652101		0.0296021
		8	46.31	2470.16	114399	22028850
		9	58.33	52.76	3077.45	592598		0.0341117
		10	39.36	2292.16	90216.9	17372299
		11	87.53	25.25	2209.67	425497		0.0185668
		12	49.2	2418.95	119012	22917096
		13	83.04	38.43	3191.36	614533		0.0255724
		14	44.78	2787.19	124797	24031126
		15	55.84	70.3	3925.06	755816		0.0322858
		16	48.11	2527	121572	23410168
		17	63.12	125.05	7892.94	1519876		0.0770689
		18	34.83	2940.8	102414	19721013
2		1	64.5	217.98	14059.3	2707272		0.128871
		2	38.26	2851.59	109096	21007639
		3	53.47	164.12	8775.47	1689818		0.0937374
		4	42.1	2223.93	93617.6	18027144
		5	48.52	33.78	1639.22	315650		0.0170364
		6	40.04	2402.8	96218.6	18528004
		7	71.19	41.01	2919.3	562144		0.0258077
		8	43.42	2605.19	113117	21782024
		9	92.23	67.81	6253.7	1204222		0.0422463
		10	53.79	2751.96	148030	28504798
		11	56.15	133.85	7515.29	1447156		0.0601905
		12	45.01	2774.08	124858	24042934
		13	85.25	15.7	1338.79	257800		0.0147783
		14	48.57	1865.32	90591.5	17444440
		15	48.27	117.48	5671	1092017		0.0591219
		16	37.16	2581.14	95920.6	18470609
		17	45.48	45.68	2077.37	400022		0.0246248
		18	35.98	2344.79	84361	16244672
3		1	66.54	93.64	6231.39	1199926		0.0679799
		2	43.76	2094.6	91665.2	17651195
		3	51.28	224.15	11494.7	2213434		0.12382
		4	32.88	2823.15	92833.8	17876205
		5	81.82	84.85	6941.87	1336736		0.0564857
		6	45.01	2730.48	122896	23665054
		7	44.85	84.11	3771.96	726335		0.046056
		8	37.64	2175.87	81899.6	15770707
		9	76.03	61.99	4712.88	907520		0.0538531
		10	41.75	2095.99	87513.7	16851772
		11	79.09	44.87	3548.67	683337		0.0357564
		12	47.11	2106.58	99245.8	19110913

## Sheet: 31A
cdc15-31A
rep1			Area	Mean	IntDen	RawIntDen		Ratio of RawIntDen			average of ratio:
1	1	1	56.83	870.44	49470.3	9526074		0.289639			0.100852
		2	40.84	4181.75	170800	32889445
	2	3	58.42	317.31	18537.9	3569692		0.127658
		4	39.44	3681.75	145215	27962885
	3	5	49.58	258.14	12799.9	2464765		0.0970492
		6	39.07	3375.92	131891	25397066
	4	7	67.13	386.86	25970.7	5000963		0.149366
		8	52.06	3340.11	173873	33481291
	5	9	56.62	243.9	13808.8	2659041		0.0794412
		10	47.59	3652.53	173824	33471802
	6	11	47.91	573.85	27491.3	5293771		0.151875
		12	38.55	4695.69	181013	34856078
	7	13	58.89	386.76	22776.3	4385841		0.125884
		14	44.82	4036.64	180930	34840213
	8	15	94.13	138.58	13044.4	2511857		0.0511945
		16	65.86	3868.87	254802	49065004
2	9	1	60.49	449.38	27182.9	5234385		0.180402
		2	44.89	3356.67	150680	29015098
	10	3	49.66	123.39	6127.66	1179951		0.0688004
		4	39.53	2253.07	89064.3	17150349
	11	5	78.63	123.79	9733.9	1874375		0.0709121
		6	48.72	2817.65	137267	26432374
	12	7	55.18	199.96	11033.4	2124598		0.0836932
		8	41.58	3170.82	131831	25385551
	13	9	53.45	42.3	2260.91	435365		0.0267942
		10	36.65	2302.46	84380.6	16248450
	14	11	48.36	70.16	3393.27	653414		0.0359068
		12	40.25	2347.76	94502.3	18197499
	15	13	54.86	260.95	14315.9	2756685		0.100992
		14	44.75	3167.34	141753	27296114
	16	15	58.45	293.4	17150.2	3302476		0.123539
		16	41.63	3334.45	138825	26732253
	17	17	59.19	159.86	9462.14	1822044		0.0781245
		18	41.57	2913.47	121116	23322323
3	18	1	75.98	187.56	14249.8	2743953		0.10305
		2	51.15	2703.56	138280	26627383
	19	3	50.91	270.55	13774.8	2652496		0.105244
		4	42.53	3077.69	130884	25203230
	20	5	57.85	173.12	10014.4	1928378		0.0773983
		6	46.57	2778.21	129387	24914982
	21	7	55.67	83.14	4628.18	891210		0.0391052
		8	43.06	2748.44	118352	22790085
	22	9	99.15	70.86	7025.92	1352921		0.0526636
		10	53.71	2484.03	133411	25689847
rep2			Area	Mean	IntDen	RawIntDen		Ratio of RawIntDen			average of ratio:
1	1	1	67.32	259.19	17448.4	3359886		0.130889			0.0988805
		2	47.24	2822.09	133307	25669761
	2	3	61.43	134.53	8264.74	1591470		0.0689834
		4	46.48	2577.69	119808	23070332
	3	5	64.61	31.52	2036.59	392168		0.0248901
		6	42.59	1920.99	81823	15755954
	4	7	53.66	196.43	10539.4	2029490		0.101427
		8	36.14	2874.92	103912	20009415
	5	9	74	121.88	9019.58	1736823		0.0700817
		10	47.65	2700.83	128701	24782840
	6	11	69.72	95.95	6689.73	1288184		0.0512995
		12	46.32	2815.14	130405	25111022
	7	13	77.46	33.86	2622.89	505068		0.0238887
		14	51.4	2136.26	109796	21142567
	8	15	55.12	221.08	12185.9	2346540		0.110633
		16	38.01	2897.57	110148	21210181
2	9	1	46.09	305.88	14097.6	2714665		0.165719
		2	33.83	2514.75	85069.4	16381084
	10	3	74.48	135.58	10097.8	1944453		0.0958486
		4	45.07	2337.72	105352	20286714
	11	5	65.2	87.25	5689	1095482		0.0569901
		6	42.49	2349.34	99824.4	19222334
	12	7	50.87	123.97	6306.69	1214426		0.0669481
		8	38.41	2452.65	94202.7	18139816
	13	9	83.92	161.7	13570	2613068		0.120205
		10	52.73	2141.09	112891	21738505
	14	11	48.42	364.79	17663.4	3401294		0.164928
		12	35.69	3001.01	107098	20622917
	15	13	70.11	169.16	11859.1	2283602		0.0930961
		14	48.62	2620.11	127385	24529506
	16	15	69	138.91	9584.54	1845613		0.0895037
		16	49.88	2146.85	107085	20620513
	17	17	88.57	104.88	9289.7	1788838		0.076875
		18	51.99	2324.39	120842	23269430
	18	19	89.76	111.59	10016.6	1928803		0.0864973
		20	51.81	2235.26	115802	22298996
3	19	1	54.04	141.63	7653.45	1473759		0.100574
		2	38.63	1969.82	76097.6	14653472
	20	3	59.62	47.25	2816.91	542428		0.0341024
		4	44.84	1842.24	82601.6	15905881
	21	5	49.82	396.98	19778.7	3808606		0.216093
		6	35.11	2606.84	91528.6	17624875
	22	7	47.65	223.26	10638.8	2048625		0.126903
		8	35.08	2389.46	83834.1	16143213
	23	9	51.28	445.86	22864.8	4402886		0.197877
		10	38.91	2969.92	115551	22250627
rep3			Area	Mean	IntDen	RawIntDen		Ratio of RawIntDen			average of ratio:
1	1	1	82.74	154.46	12780.3	2461001		0.0865368			0.0760222
		2	44.82	3294.96	147687	28438778
	2	3	70.47	235.32	16583.2	3193291		0.113986
		4	39.28	3703.7	145485	28014803
	3	5	58.74	304.15	17867.3	3440554		0.153769
		6	35.25	3296.71	116195	22374757
	4	7	44.39	84.68	3758.75	723790		0.0458448
		8	30.3	2706.18	81988.5	15787830
	5	9	51.38	125.97	6472.7	1246393		0.0693688
		10	33.28	2803.94	93308.5	17967630
	6	11	67.86	79.52	5396.76	1039208		0.0589995
		12	36.86	2481.52	91471.3	17613845
	7	13	43.99	128.76	5663.62	1090595		0.0765342
		14	32.16	2300.95	74001.1	14249764
	8	15	70.28	48.38	3400.5	654805		0.0442346
		16	38.43	2000.13	76874.1	14802989
	9	17	37.38	93.12	3480.77	670262		0.05115
		18	32.64	2084.61	68050.2	13103848
2	10	1	40.35	152.07	6136.31	1181617		0.0845301
		2	31.92	2274.43	72593.2	13978662
	11	3	96.47	30.34	2926.48	563528		0.0360061
		4	52.85	1538.02	81277.4	15650906
	12	5	55.05	313.9	17279.3	3327333		0.152082
		6	34.9	3255.73	113618	21878506
	13	7	65.51	134.62	8819.06	1698211		0.101739
		8	42.28	2050.08	86682.9	16691790
	14	9	51.94	94.97	4932.39	949789		0.0691918
		10	38.62	1845.76	71285.8	13726892
3	15	1	51.25	70.54	3615.44	696195		0.0425112
		2	34.61	2457.13	85046.8	16376744
	16	3	43.67	94.6	4131.58	795583		0.0478792
		4	35.79	2411.33	86291.8	16616479
	17	5	40.51	220.36	8926.18	1718838		0.100231
		6	34.33	2594.36	89056	17148749
	18	7	51.3	112.31	5761.99	1109537		0.0774057
		8	33.87	2197.8	74438.8	14334044
	19	9	51.6	119.14	6147.59	1183789		0.0698285
		10	33.25	2647.64	88038.4	16952813
	20	11	58.81	67.34	3959.96	762535		0.0386148
		12	44.26	2316.93	102550	19747228
