# Supplementary material for: La pintura de Europa Oriental (1917-1989)
Source: eLife journal article supplement (doi:10.7554/elife.83062), 1990-01-01
Supplement: fig5-figsupp2-data1 [file Tip septa count_All Strains.xlsx]

## Sheet: Combined results-all replicates
Inhibitor (s)	wt						mid1△						kin1as1						shk1as2						pck1as2						mid1△ pom1as1						mid1△ kin1as1						mid1△ shk1as2						mid1△ pck1as2
	Rep 1		Rep 2		Rep 3		Rep 1		Rep 2		Rep 3		Rep 1		Rep 2		Rep 3		Rep 1		Rep 2		Rep 3		Rep 1		Rep 2		Rep 3		Rep 1		Rep 2		Rep 3		Rep 1		Rep 2		Rep 3		Rep 1		Rep 2		Rep 3		Rep 1
	tip septa	no tip septa	tip septa	no tip septa	tip septa	no tip septa	tip septa	no tip septa	tip septa	no tip septa	tip septa	no tip septa	tip septa	no tip septa	tip septa	no tip septa	tip septa	no tip septa	tip septa	no tip septa	tip septa	no tip septa	tip septa	no tip septa	tip septa	no tip septa	tip septa	no tip septa	tip septa	no tip septa	tip septa	no tip septa	tip septa	no tip septa	tip septa	no tip septa	tip septa	no tip septa	tip septa	no tip septa	tip septa	no tip septa	tip septa	no tip septa	tip septa	no tip septa	tip septa	no tip septa	tip septa
	0	257	0	122	0	230	9	102	3	49	2	47	0	34	0	89	0	111	0	78	0	42	0	29	0	54	0	29	0	86	53	5	71	2	80	3	16	45	13	34	23	51	27	60	27	80	18	48	14
%	0	100	0	100	0	100	8.10811	91.8919	5.76923	94.2308	4.08163	95.9184	0	100	0	100	0	100	0	100	0	100	0	100	0	100	0	100	0	100	91.3793	8.62069	97.2603	2.73973	96.3855	3.61446	26.2295	73.7705	27.6596	72.3404	31.0811	68.9189	31.0345	68.9655	25.2336	74.7664	27.2727	72.7273	19.4444
DMSO
	wt						mid1△						kin1as1						shk1as2						pck1as2						mid1△ pom1as1						mid1△ kin1as1						mid1△ shk1as2						mid1△ pck1as2
	Rep 1		Rep 2		Rep 3		Rep 1		Rep 2		Rep 3		Rep 1		Rep 2		Rep 3		Rep 1		Rep 2		Rep 3		Rep 1		Rep 2		Rep 3		Rep 1		Rep 2		Rep 3		Rep 1		Rep 2		Rep 3		Rep 1		Rep 2		Rep 3		Rep 1
	tip septa	no tip septa	tip septa	no tip septa	tip septa	no tip septa	tip septa	no tip septa	tip septa	no tip septa	tip septa	no tip septa	tip septa	no tip septa	tip septa	no tip septa	tip septa	no tip septa	tip septa	no tip septa	tip septa	no tip septa	tip septa	no tip septa	tip septa	no tip septa	tip septa	no tip septa	tip septa	no tip septa	tip septa	no tip septa	tip septa	no tip septa	tip septa	no tip septa	tip septa	no tip septa	tip septa	no tip septa	tip septa	no tip septa	tip septa	no tip septa	tip septa	no tip septa	tip septa	no tip septa	tip septa
	0	98	0	201	0	101	5	97	12	189	4	153	0	47	0	57	0	63	0	65	0	49	0	33	0	27	0	44	0	76	2	63	8	69	7	73	2	55	6	49	3	45	7	70	4	93	4	35	7
%	0	100	0	100	0	100	4.90196	95.098	5.97015	94.0299	2.54777	97.4522	0	100	0	100	0	100	0	100	0	100	0	100	0	100	0	100	0	100	3.07692	96.9231	10.3896	89.6104	8.75	91.25	3.50877	96.4912	10.9091	89.0909	6.25	93.75	9.09091	90.9091	4.12371	95.8763	10.2564	89.7436	6.42202
[truncated: 5 more columns]
