# Supplementary material for: La pintura de Europa Oriental (1917-1989)
Source: eLife journal article supplement (doi:10.7554/elife.83062), 1990-01-01
Supplement: fig7-data1 [file LLPS-FRAP.xlsx]

## Sheet: 100percent Laser-FRAP
100 percent laser, 0.3 sec pulse
																		real value				real value
		Area	Mean	Int Den	Raw Int Den	Spot of interst (Background)	Area	Mean	Int Den	Raw Int Den		Spot of interst (Photobleaching control)	Area		Area	Mean	Int Den	Raw Int Den	Spot of interst (Background)	Area	Mean	Int Den	Raw Int Den
	2	0.645	19554.5	12612	1075495	2	0.645	1927.4	1243.12	106007		2	0.645	20066.2	12942.1	1103640		969488	997633	1001046	0.996591	972805	974744	99.801
	3	0.645	19537.7	12601.2	1074572	3	0.645	1936.04	1248.68	106482		3	0.645	20012.6	12907.5	1100694		968090	994212		0.993173	974744		100
	4	0.645	19553.4	12611.3	1075435	4	0.645	1930.26	1244.96	106164		4	0.645	20107.9	12969	1105935		969271	999771		0.998726	970507		99.5653
	5	0.645	19546.1	12606.6	1075035	5	0.645	1933.44	1247.01	106339		5	0.645	20109.2	12969.9	1106008		968696	999669		0.998624	970030		99.5164
	6	0.645	11000.7	7095.1	605037	6	0.645	1904.73	1228.49	104760		6	0.645	19956.4	12871.3	1097601		500277	992841		0.991804	504411		51.7481
	7	0.645	12084.1	7793.85	664623	7	0.645	1893.24	1221.08	104128		7	0.645	19992.9	12894.8	1099612		560495	995484		0.994444	563627		57.823
	8	0.645	12438.6	8022.52	684123	8	0.645	1921.65	1239.41	105691		8	0.645	19896.6	12832.7	1094314		578432	988623		0.98759	585701		60.0876
	9	0.645	12656.3	8162.93	696096	9	0.645	1910	1231.89	105050		9	0.645	19968.4	12879	1098263		591046	993213		0.992175	595707		61.1142
	10	0.645	12887.1	8311.82	708793	10	0.645	1901.33	1226.3	104573		10	0.645	19938.3	12859.6	1096605		604220	992032		0.990995	609710		62.5508
	11	0.645	12971.5	8366.21	713431	11	0.645	1923.93	1240.88	105816		11	0.645	19995.9	12896.8	1099777		607615	993961		0.992922	611946		62.7802
	12	0.645	13078	8434.9	719289	12	0.645	1907.06	1229.99	104888		12	0.645	19986.3	12890.5	1099245		614401	994357		0.993318	618534		63.456
	13	0.645	13168.2	8493.1	724252	13	0.645	1906.55	1229.66	104860		13	0.645	19853.1	12804.6	1091920		619392	987060		0.986029	628168		64.4444
	14	0.645	13265.4	8555.78	729597	14	0.645	1909.8	1231.76	105039		14	0.645	19941.7	12861.8	1096793		624558	991754		0.990718	630410		64.6744
	15	0.645	13407.9	8647.69	737434	15	0.645	1895.49	1222.53	104252		15	0.645	19960.7	12874	1097838		633182	993586		0.992548	637936		65.4465
	16	0.645	13380.5	8629.99	735925	16	0.645	1904.29	1228.21	104736		16	0.645	19907.3	12839.6	1094901		631189	990165		0.98913	638125		65.4659
	17	0.645	13522.7	8721.7	743746	17	0.645	1915.13	1235.2	105332		17	0.645	19961.1	12874.3	1097859		638414	992527		0.99149	643894		66.0577
	18	0.645	13571.8	8753.39	746448	18	0.645	1911.36	1232.77	105125		18	0.645	19925.8	12851.5	1095919		641323	990794		0.989759	647959		66.4748
	19	0.645	13619.7	8784.33	749086	19	0.645	1919.51	1238.03	105573		19	0.645	19914.1	12844	1095275		643513	989702		0.988668	650889		66.7753
	20	0.645	13694.8	8832.71	753212	20	0.645	1906.29	1229.5	104846		20	0.645	19930.5	12854.6	1096178		648366	991332		0.990296	654719		67.1683
	21	0.645	13785.1	8890.94	758178	21	0.645	1895.67	1222.65	104262		21	0.645	19961	12874.2	1097854		653916	993592		0.992554	658822		67.5892
	22	0.645	13850.6	8933.19	761781	22	0.645	1903.16	1227.48	104674		22	0.645	19979	12885.8	1098843		657107	994169		0.99313	661652		67.8796
	23	0.645	13917.8	8976.56	765479	23	0.645	1900	1225.44	104500		23	0.645	19933.3	12856.4	1096331		660979	991831		0.990795	667120		68.4405
	24	0.645	13936.7	8988.72	766516	24	0.645	1899.06	1224.83	104448		24	0.645	19980.3	12886.7	1098916		662068	994468		0.993429	666447		68.3715
	25	0.645	14077.9	9079.85	774287	25	0.645	1915.24	1235.27	105338		25	0.645	19988.7	12892.1	1099378		668949	994040		0.993001	673664		69.1118
	26	0.645	14058.2	9067.13	773202	26	0.645	1911.74	1233.02	105146		26	0.645	19970.3	12880.2	1098366		668056	993220		0.992182	673320		69.0766
	27	0.645	14181.7	9146.79	779995	27	0.645	1901.11	1226.16	104561		27	0.645	20021	12913	1101157		675434	996596		0.995555	678450		69.6029
	28	0.645	14184.7	9148.69	780157	28	0.645	1911.93	1233.13	105156		28	0.645	20025	12915.5	1101373		675001	996217		0.995176	678273		69.5847
	29	0.645	14211.2	9165.78	781615	29	0.645	1912.11	1233.25	105166		29	0.645	20086.3	12955.1	1104749		676449	999583		0.998539	677439		69.4991
	30	0.645	14275.2	9207.05	785134	30	0.645	1904.6	1228.41	104753		30	0.645	20023.2	12914.4	1101277		680381	996524		0.995483	683468		70.1177
	31	0.645	14384.1	9277.34	791128	31	0.645	1908.09	1230.66	104945		31	0.645	20108.9	12969.7	1105991		686183	1001046		1	686183		70.3962
	32	0.645	14383.8	9277.14	791111	32	0.645	1916.06	1235.8	105383		32	0.645	20030.1	12918.8	1101653		685728	996270		0.995229	689015		70.6868
	33	0.645	14412.1	9295.35	792664	33	0.645	1922.71	1240.09	105749		33	0.645	20086.9	12955.4	1104779		686915	999030		0.997986	688301		70.6135
	34	0.645	14389.7	9280.93	791434	34	0.645	1900.26	1225.61	104514		34	0.645	20044.8	12928.3	1102465		686920	997951		0.996908	689050		70.6904
	35	0.645	14403.5	9289.83	792193	35	0.645	1901.96	1226.71	104608		35	0.645	20029.9	12918.7	1101647		687585	997039		0.995997	690348		70.8235
	36	0.645	14512.7	9360.28	798201	36	0.645	1903.33	1227.59	104683		36	0.645	20057.5	12936.5	1103162		693518	998479		0.997436	695301		71.3316
	37	0.645	14478.5	9338.18	796316	37	0.645	1912.53	1233.52	105189		37	0.645	20027.1	12916.9	1101489		691127	996300		0.995259	694419		71.2412
	38	0.645	14497.4	9350.39	797357	38	0.645	1878.84	1211.79	103336		38	0.645	20029.2	12918.3	1101608		694021	998272		0.997229	695950		71.3982
	39	0.645	14552.5	9385.92	800387	39	0.645	1906.56	1229.68	104861		39	0.645	20005.3	12902.8	1100292		695526	995431		0.994391	699449		71.7572
	40	0.645	14555.9	9388.09	800572	40	0.645	1911.65	1232.96	105141		40	0.645	20074.6	12947.5	1104104		695431	998963		0.997919	696881		71.4937
	41	0.645	14531.5	9372.39	799233	41	0.645	1897.74	1223.99	104376		41	0.645	20001.9	12900.6	1100106		694857	995730		0.99469	698567		71.6667
	42	0.645	14553.1	9386.33	800422	42	0.645	1918.65	1237.47	105526		42	0.645	20037.4	12923.5	1102058		694896	996532		0.995491	698044		71.613
	43	0.645	14635.5	9439.44	804951	43	0.645	1905.07	1228.71	104779		43	0.645	19969.6	12879.8	1098330		700172	993551		0.992513	705454		72.3732
	44	0.645	14653.9	9451.29	805962	44	0.645	1900.47	1225.75	104526		44	0.645	19973.7	12882.5	1098556		701436	994030		0.992991	706387		72.4689
	45	0.645	14643.6	9444.7	805400	45	0.645	1913.71	1234.29	105254		45	0.645	20001.2	12900.1	1100064		700146	994810		0.993771	704535		72.2789
	46	0.645	14635.7	9439.56	804961	46	0.645	1900.71	1225.9	104539		46	0.645	20013.5	12908.1	1100742		700422	996203		0.995162	703827		72.2063
	47	0.645	14672.8	9463.51	807004	47	0.645	1905.47	1228.97	104801		47	0.645	20014.3	12908.6	1100785		702203	995984		0.994943	705772		72.4058
	48	0.645	14689.4	9474.24	807919	48	0.645	1896.93	1223.46	104331		48	0.645	19984.9	12889.6	1099167		703588	994836		0.993796	707980		72.6324
	49	0.645	14727	9498.48	809986	49	0.645	1905.55	1229.02	104805		49	0.645	20008.4	12904.8	1100460		705181	995655		0.994615	708999		72.7369
	50	0.645	14711.5	9488.47	809132	50	0.645	1895.98	1222.85	104279		50	0.645	19985.2	12889.9	1099188		704853	994909		0.993869	709201		72.7576
	51	0.645	14661.9	9456.49	806405	51	0.645	1895.84	1222.76	104271		51	0.645	19934.5	12857.2	1096398		702134	992127		0.99109	708446		72.6802
	52	0.645	14669.6	9461.45	806828	52	0.645	1891.74	1220.12	104046		52	0.645	19967.8	12878.6	1098228		702782	994182		0.993143	707634		72.5969
	53	0.645	14723.9	9496.49	809816	53	0.645	1908.87	1231.16	104988		53	0.645	19985.8	12890.2	1099219		704828	994231		0.993192	709659		72.8046
	54	0.645	14739.2	9506.36	810658	54	0.645	1893.67	1221.36	104152		54	0.645	19907.2	12839.5	1094895		706506	990743		0.989708	713853		73.2349
	55	0.645	14737.9	9505.51	810585	55	0.645	1903.35	1227.6	104684		55	0.645	19990.6	12893.3	1099482		705901	994798		0.993759	710335		72.8739
	56	0.645	14776.3	9530.28	812698	56	0.645	1901.62	1226.49	104589		56	0.645	19943.3	12862.9	1096884		708109	992295		0.991258	714354		73.2863
	57	0.645	14800.4	9545.79	814020	57	0.645	1902.42	1227	104633		57	0.645	19910.8	12841.9	1095096		709387	990463		0.989428	716967		73.5543
	58	0.645	14749.8	9513.18	811239	58	0.645	1869.6	1205.84	102828		58	0.645	19878.2	12820.8	1093300		708411	990472		0.989437	715974		73.4525
	59	0.645	14769.2	9525.7	812307	59	0.645	1903.87	1227.94	104713		59	0.645	19925.8	12851.6	1095921		707594	991208		0.990172	714617		73.3133
	60	0.645	14770.6	9526.61	812385	60	0.645	1902.22	1226.87	104622		60	0.645	19886.4	12826.1	1093750		707763	989128		0.988094	716291		73.485
	61	0.645	14799.5	9545.21	813971	61	0.645	1889.09	1218.41	103900		61	0.645	19860.2	12809.2	1092310		710071	988410		0.987377	719149		73.7782
	62	0.645	14717	9492	809433	62	0.645	1888.49	1218.02	103867		62	0.645	19877.7	12820.5	1093273		705566	989406		0.988372	713867		73.2363
	63	0.645	14751	9513.94	811304	63	0.645	1899.04	1224.82	104447		63	0.645	19857.8	12807.7	1092178		706857	987731		0.986699	716386		73.4947
	64	0.645	14850.3	9578.02	816769	64	0.645	1886.96	1217.04	103783		64	0.645	19831.3	12790.6	1090720		712986	986937		0.985906	723179		74.1916
	65	0.645	14793.4	9541.32	813639	65	0.645	1901.42	1226.36	104578		65	0.645	19872.9	12817.4	1093007		709061	988429		0.987396	718112		73.6718
																		0	0			#DIV/0!
																		0	0			#DIV/0!
	1	0.41	19866.1	8153.73	695312	1	0.41	1771.54	727.104	62004		1	0.41	22414.8	9199.83	784518		633308	722514	722514	1	633308	634731	99.7759
	2	0.41	19797.3	8125.52	692906	2	0.41	1782.69	731.677	62394		2	0.41	22418.8	9201.46	784657		630512	722263		0.999653	630731		99.3699
	3	0.41	19735.7	8100.23	690750	3	0.41	1780.46	730.763	62316		3	0.41	22378.6	9184.97	783251		628434	720935		0.997815	629810		99.2248
	4	0.41	19834.8	8140.89	694217	4	0.41	1784.57	732.451	62460		4	0.41	22331.1	9165.48	781589		631757	719129		0.995315	634731		100
	5	0.41	19877.1	8158.25	695697	5	0.41	1782.6	731.642	62391		5	0.41	22410.9	9198.21	784380		633306	721989		0.999273	633767		99.8481
	6	0.41	10926.4	4484.59	382425	6	0.41	1776.63	729.191	62182		6	0.41	22398.5	9193.13	783947		320243	721765		0.998963	320575		50.5057
	7	0.41	12197.8	5006.4	426922	7	0.41	1747.14	717.089	61150		7	0.41	22369.9	9181.39	782946		365772	721796		0.999006	366136		57.6836
	8	0.41	12548.1	5150.2	439185	8	0.41	1771.49	727.08	62002		8	0.41	22329.4	9164.79	781530		377183	719528		0.995867	378748		59.6707
	9	0.41	12916.8	5301.52	452089	9	0.41	1768.06	725.673	61882		9	0.41	22383.1	9186.83	783410		390207	721528		0.998635	390740		61.56
	10	0.41	13106.3	5379.27	458719	10	0.41	1770.43	726.646	61965		10	0.41	22257.4	9135.21	779008		396754	717043		0.992428	399781		62.9844
	11	0.41	13232.6	5431.13	463141	11	0.41	1785.2	732.709	62482		11	0.41	22289.4	9148.35	780128		400659	717646		0.993262	403377		63.5509
	12	0.41	13375.9	5489.94	468156	12	0.41	1758.29	721.663	61540		12	0.41	22315.9	9159.23	781056		406616	719516		0.995851	408310		64.3281
	13	0.41	13500.6	5541.11	472520	13	0.41	1777.77	729.66	62222		13	0.41	22344.1	9170.83	782045		410298	719823		0.996276	411832		64.8829
	14	0.41	13586.8	5576.49	475537	14	0.41	1733.09	711.32	60658		14	0.41	22305.3	9154.9	780687		414879	720029		0.996561	416311		65.5886
	15	0.41	13708.3	5626.36	479790	15	0.41	1771.54	727.104	62004		15	0.41	22253.7	9133.72	778881		417786	716877		0.992198	421071		66.3386
	16	0.41	13824.3	5673.96	483849	16	0.41	1770.23	726.564	61958		16	0.41	22274.9	9142.42	779623		421891	717665		0.993289	424742		66.9168
	17	0.41	13867.4	5691.68	485360	17	0.41	1750.2	718.344	61257		17	0.41	22182.4	9104.45	776385		424103	715128		0.989777	428483		67.5063
	18	0.41	13954.4	5727.38	488404	18	0.41	1765.46	724.606	61791		18	0.41	22241	9128.49	778435		426613	716644		0.991876	430107		67.7622
	19	0.41	13949.3	5725.27	488224	19	0.41	1761.66	723.046	61658		19	0.41	22217.3	9118.75	777604		426566	715946		0.99091	430479		67.8208
	20	0.41	14083.9	5780.52	492936	20	0.41	1761.2	722.859	61642		20	0.41	22313.7	9158.33	780979		431294	719337		0.995603	433199		68.2492
	21	0.41	14139.2	5803.23	494872	21	0.41	1763.06	723.621	61707		21	0.41	22254.6	9134.06	778910		433165	717203		0.992649	436373		68.7493
	22	0.41	14217.6	5835.39	497615	22	0.41	1777.97	729.742	62229		22	0.41	22226.7	9122.63	777935		435386	715706		0.990577	439528		69.2463
	23	0.41	14259.1	5852.44	499069	23	0.41	1760.26	722.472	61609		23	0.41	22238.7	9127.54	778354		437460	716745		0.992015	440981		69.4753
	24	0.41	14358.8	5893.35	502557	24	0.41	1777.89	729.707	62226		24	0.41	22215.7	9118.11	777550		440331	715324		0.990049	444757		70.0702
	25	0.41	14282.9	5862.23	499903	25	0.41	1771.77	727.198	62012		25	0.41	22116.7	9077.46	774083		437891	712071		0.985546	444313		70.0002
	26	0.41	14362	5894.67	502670	26	0.41	1764.43	724.184	61755		26	0.41	22228.4	9123.32	777994		440915	716239		0.991315	444778		70.0735
	27	0.41	14418.2	5917.73	504636	27	0.41	1774.74	728.417	62116		27	0.41	22089.6	9066.35	773136		442520	711020		0.984092	449674		70.8448
	28	0.41	14440.7	5926.98	505425	28	0.41	1764.14	724.067	61745		28	0.41	22229.1	9123.6	778018		443680	716273		0.991362	447546		70.5096
	29	0.41	14526.5	5962.21	508429	29	0.41	1767.31	725.368	61856		29	0.41	22152.4	9092.13	775334		446573	713478		0.987494	452229		71.2473
	30	0.41	14546	5970.2	509111	30	0.41	1765.4	724.583	61789		30	0.41	22227.6	9122.99	777966		447322	716177		0.991229	451280		71.0979
	31	0.41	14567.4	5978.96	509858	31	0.41	1769.34	726.201	61927		31	0.41	22076.9	9061.12	772690		447931	710763		0.983736	455337		71.737
	32	0.41	14569.8	5979.97	509944	32	0.41	1756.14	720.783	61465		32	0.41	22083.5	9063.83	772921		448479	711456		0.984695	455450		71.7548
	33	0.41	14614.6	5998.36	511512	33	0.41	1769.83	726.4	61944		33	0.41	22174.8	9101.33	776119		449568	714175		0.988458	454817		71.6552
	34	0.41	14647.8	6011.99	512674	34	0.41	1771.09	726.916	61988		34	0.41	22175.1	9101.46	776130		450686	714142		0.988413	455969		71.8367
	35	0.41	14681.7	6025.9	513860	35	0.41	1755.97	720.713	61459		35	0.41	22050.1	9050.15	771754		452401	710295		0.983088	460184		72.5006
	36	0.41	14787.4	6069.26	517558	36	0.41	1770.69	726.752	61974		36	0.41	22173.3	9100.7	776065		455584	714091		0.988342	460958		72.6226
	37	0.41	14725.5	6043.88	515394	37	0.41	1751.54	718.895	61304		37	0.41	22098	9069.79	773429		454090	712125		0.985621	460715		72.5843
	38	0.41	14692.4	6030.27	514233	38	0.41	1768.94	726.037	61913		38	0.41	22075.7	9060.64	772649		452320	710736		0.983699	459816		72.4426
	39	0.41	14785.9	6068.64	517505	39	0.41	1767.09	725.274	61848		39	0.41	22110.2	9074.82	773858		455657	712010		0.985462	462379		72.8465
	40	0.41	14797.7	6073.52	517921	40	0.41	1776.69	729.215	62184		40	0.41	22115.6	9077.01	774045		455737	711861		0.985256	462557		72.8745
	41	0.41	14879.7	6107.17	520791	41	0.41	1760.6	722.612	61621		41	0.41	22079	9062.01	772766		459170	711145		0.984265	466511		73.4974
	42	0.41	14823.2	6083.97	518812	42	0.41	1755.29	720.431	61435		42	0.41	22086.7	9065.15	773033		457377	711598		0.984892	464393		73.1638
	43	0.41	14893.5	6112.82	521273	43	0.41	1752.86	719.435	61350		43	0.41	22172.7	9100.47	776045		459923	714695		0.989178	464955		73.2523
	44	0.41	14863.4	6100.47	520219	44	0.41	1742.03	714.99	60971		44	0.41	22028.3	9041.21	770992		459248	710021		0.982709	467329		73.6263
	45	0.41	14931.6	6128.47	522607	45	0.41	1747.14	717.089	61150		45	0.41	22139.1	9086.66	774868		461457	713718		0.987826	467144		73.5972
	46	0.41	14946	6134.35	523109	46	0.41	1744.77	716.116	61067		46	0.41	22078.7	9061.86	772753		462042	711686		0.985013	469072		73.9009
	47	0.41	14942.4	6132.88	522983	47	0.41	1761.69	723.058	61659		47	0.41	22115.1	9076.8	774027		461324	712368		0.985957	467894		73.7154
	48	0.41	14967.4	6143.14	523858	48	0.41	1747.94	717.418	61178		48	0.41	22088	9065.71	773081		462680	711903		0.985314	469576		73.9804
	49	0.41	14948	6135.18	523179	49	0.41	1769.83	726.4	61944		49	0.41	22099.7	9070.52	773491		461235	711547		0.984821	468344		73.7862
	50	0.41	14992.9	6153.6	524750	50	0.41	1766.86	725.181	61840		50	0.41	22119.2	9078.5	774172		462910	712332		0.985908	469527		73.9726
	51	0.41	14995.8	6154.82	524854	51	0.41	1764.09	724.043	61743		51	0.41	22130	9082.92	774549		463111	712806		0.986564	469418		73.9555
	52	0.41	15023.8	6166.3	525833	52	0.41	1753.03	719.505	61356		52	0.41	22132.8	9084.09	774649		464477	713293		0.987238	470481		74.123
	53	0.41	14954.7	6137.94	523415	53	0.41	1753.8	719.822	61383		53	0.41	21998.9	9029.14	769963		462032	708580		0.980715	471118		74.2232
	54	0.41	15090	6193.46	528149	54	0.41	1764.83	724.348	61769		54	0.41	22092.2	9067.41	773226		466380	711457		0.984696	473628		74.6188
	55	0.41	15050.3	6177.17	526760	55	0.41	1754.43	720.079	61405		55	0.41	22071.6	9058.97	772506		465355	711101		0.984204	472824		74.492
	56	0.41	15098.6	6197.01	528452	56	0.41	1766	724.829	61810		56	0.41	22069.2	9057.98	772422		466642	710612		0.983527	474458		74.7495
	57	0.41	15092.1	6194.34	528224	57	0.41	1752.86	719.435	61350		57	0.41	22064.5	9056.07	772259		466874	710909		0.983938	474495		74.7554
	58	0.41	15133.9	6211.47	529685	58	0.41	1777.63	729.602	62217		58	0.41	22061.5	9054.81	772152		467468	709935		0.98259	475751		74.9532
	59	0.41	15087.5	6192.46	528064	59	0.41	1734.11	711.742	60694		59	0.41	22074.7	9060.23	772614		467370	711920		0.985337	474325		74.7285
	60	0.41	15110.7	6201.97	528875	60	0.41	1759.29	722.073	61575		60	0.41	21955.3	9011.25	768437		467300	706862		0.978337	477647		75.252
	61	0.41	15160.7	6222.47	530623	61	0.41	1751.51	718.883	61303		61	0.41	22017.6	9036.79	770615		469320	709312		0.981728	478055		75.3162
	62	0.41	15135.7	6212.21	529748	62	0.41	1744.17	715.87	61046		62	0.41	21955.5	9011.32	768443		468702	707397		0.979077	478718		75.4207
	63	0.41	15186.1	6232.92	531514	63	0.41	1749.83	718.191	61244		63	0.41	21989.4	9025.23	769629		470270	708385		0.980445	479650		75.5674
	64	0.41	15163.1	6223.48	530709	64	0.41	1731.63	710.722	60607		64	0.41	22043.1	9047.28	771510		470102	710903		0.98393	477780		75.2729
	65	0.41	15205	6240.66	532174	65	0.41	1756.83	721.065	61489		65	0.41	22045.9	9048.42	771607		470685	710118		0.982843	478901		75.4495
																		0	0			#DIV/0!
																		0	0			#DIV/0!
	1	0.305	20743.2	6324.48	539322	1	0.305	1785.35	544.343	46419		1	0.305	23074.3	7035.24	599932		492903	553513	556230	0.995115	495322	496830	99.6966
	2	0.305	20833.8	6352.12	541679	2	0.305	1774.88	541.153	46147		2	0.305	23168.3	7063.91	602377		495532	556230		1	495532		99.7387
	3	0.305	20762.5	6330.37	539824	3	0.305	1795.69	547.497	46688		3	0.305	23095	7041.55	600470		493136	553782		0.995599	495316		99.6952
	4	0.305	20746.5	6325.51	539410	4	0.305	1793.42	546.805	46629		4	0.305	23099.6	7042.95	600590		492781	553961		0.995921	494799		99.5913
	5	0.305	20797.8	6341.13	540742	5	0.305	1785.42	544.366	46421		5	0.305	23070.8	7034.18	599842		494321	553421		0.99495	496830		100
	6	0.305	12202.8	3720.57	317273	6	0.305	1761.92	537.201	45810		6	0.305	22914.6	6986.55	595780		271463	549970		0.988746	274553		55.2609
	7	0.305	13467.1	4106.05	350145	7	0.305	1754.42	534.914	45615		7	0.305	22888.7	6978.64	595106		304530	549491		0.987885	308265		62.0463
	8	0.305	13823.9	4214.83	359421	8	0.305	1764.27	537.917	45871		8	0.305	22950.6	6997.51	596715		313550	550844		0.990317	316616		63.7272
	9	0.305	14122.3	4305.82	367180	9	0.305	1752.12	534.211	45555		9	0.305	22997.2	7011.71	597926		321625	552371		0.993062	323872		65.1877
	10	0.305	14294.1	4358.19	371646	10	0.305	1772.38	540.391	46082		10	0.305	23104.3	7044.4	600713		325564	554631		0.997125	326503		65.7172
	11	0.305	14510.7	4424.25	377279	11	0.305	1764.27	537.917	45871		11	0.305	23095.3	7041.65	600479		331408	554608		0.997084	332377		66.8996
	12	0.305	14629.4	4460.42	380364	12	0.305	1754.73	535.008	45623		12	0.305	23017.8	7018	598462		334741	552839		0.993904	336794		67.7886
	13	0.305	14695.8	4480.69	382092	13	0.305	1783.65	543.827	46375		13	0.305	22909.5	6985	595648		335717	549273		0.987493	339969		68.4277
	14	0.305	14795.4	4511.04	384680	14	0.305	1772.15	540.321	46076		14	0.305	22891.7	6979.56	595184		338604	549108		0.987196	342996		69.0368
	15	0.305	14866.2	4532.64	386522	15	0.305	1764.77	538.069	45884		15	0.305	22929.1	6990.97	596157		340638	550273		0.98929	344326		69.3045
	16	0.305	14996.5	4572.35	389909	16	0.305	1764.12	537.87	45867		16	0.305	22901.3	6982.48	595433		344042	549566		0.988019	348214		70.0871
	17	0.305	15062.3	4592.43	391621	17	0.305	1755.81	535.337	45651		17	0.305	23027.6	7020.99	598717		345970	553066		0.994312	347949		70.0339
	18	0.305	15083.4	4598.86	392169	18	0.305	1795.08	547.31	46672		18	0.305	22900	6982.09	595400		345497	548728		0.986513	350221		70.491
	19	0.305	15144.7	4617.53	393761	19	0.305	1763.85	537.788	45860		19	0.305	22988	7008.91	597687		347901	551827		0.992084	350677		70.5829
	20	0.305	15168.1	4624.68	394371	20	0.305	1773.96	540.872	46123		20	0.305	22832.5	6961.51	593645		348248	547522		0.984345	353787		71.2088
	21	0.305	15236.2	4645.42	396140	21	0.305	1768.04	539.066	45969		21	0.305	22882.7	6976.83	594951		350171	548982		0.986969	354794		71.4116
	22	0.305	15228.5	4643.09	395941	22	0.305	1741.92	531.103	45290		22	0.305	22897.7	6981.38	595339		350651	550049		0.988888	354591		71.3708
	23	0.305	15441	4707.89	401467	23	0.305	1761.08	536.943	45788		23	0.305	22839.4	6963.62	593825		355679	548037		0.98527	360996		72.6599
	24	0.305	15374.5	4687.6	399737	24	0.305	1760.58	536.791	45775		24	0.305	22807	6953.74	592982		353962	547207		0.983778	359799		72.4188
	25	0.305	15469.9	4716.7	402218	25	0.305	1753.04	534.492	45579		25	0.305	22796.3	6950.46	592703		356639	547124		0.983629	362575		72.9776
	26	0.305	15498.5	4725.4	402960	26	0.305	1774.62	541.071	46140		26	0.305	22805.4	6953.26	592941		356820	546801		0.983048	362973		73.0578
	27	0.305	15529.5	4734.86	403767	27	0.305	1769.85	539.617	46016		27	0.305	22882.7	6976.83	594951		357751	548935		0.986885	362505		72.9636
	28	0.305	15491.2	4723.2	402772	28	0.305	1738.38	530.024	45198		28	0.305	22747.3	6935.55	591431		357574	546233		0.982027	364118		73.2883
	29	0.305	15547.8	4740.46	404244	29	0.305	1778.23	542.173	46234		29	0.305	22818.3	6957.18	593276		358010	547042		0.983482	364023		73.2691
	30	0.305	15622	4763.06	406171	30	0.305	1787.62	545.035	46478		30	0.305	22790.5	6948.69	592552		359693	546074		0.981741	366383		73.7441
	31	0.305	15662.8	4775.5	407232	31	0.305	1765.35	538.245	45899		31	0.305	22732.9	6931.14	591055		361333	545156		0.980091	368673		74.205
	32	0.305	15654.2	4772.88	407009	32	0.305	1777.62	541.986	46218		32	0.305	22739	6933.02	591215		360791	544997		0.979805	368227		74.1153
	33	0.305	15695.6	4785.5	408085	33	0.305	1763.96	537.823	45863		33	0.305	22799.4	6951.41	592784		362222	546921		0.983264	368387		74.1475
	34	0.305	15681.6	4781.23	407721	34	0.305	1780.77	542.947	46300		34	0.305	22766.5	6941.39	591929		361421	545629		0.980941	368443		74.1588
	35	0.305	15712.9	4790.79	408536	35	0.305	1766.77	538.679	45936		35	0.305	22624.9	6898.22	588248		362600	542312		0.974978	371906		74.8557
	36	0.305	15762	4805.76	409813	36	0.305	1769.46	539.5	46006		36	0.305	22777	6944.6	592203		363807	546197		0.981962	370490		74.5707
	37	0.305	15695.9	4785.61	408094	37	0.305	1779.27	542.49	46261		37	0.305	22657.2	6908.06	589087		361833	542826		0.975902	370768		74.6267
	38	0.305	15734.9	4797.5	409108	38	0.305	1747.5	532.804	45435		38	0.305	22708.7	6923.77	590427		363673	544992		0.979796	371172		74.7081
	39	0.305	15891.6	4845.26	413181	39	0.305	1783.65	543.827	46375		39	0.305	22746.1	6935.16	591398		366806	545023		0.979852	374348		75.3474
	40	0.305	15800	4817.33	410799	40	0.305	1767.96	539.042	45967		40	0.305	22670.9	6912.25	589444		364832	543477		0.977072	373393		75.1551
	41	0.305	15810.4	4820.5	411070	41	0.305	1744.92	532.018	45368		41	0.305	22740.4	6933.44	591251		365702	545883		0.981398	372634		75.0023
	42	0.305	15884	4842.94	412983	42	0.305	1773	540.579	46098		42	0.305	22741.6	6933.8	591282		366885	545184		0.980141	374318		75.3414
	43	0.305	15862.1	4836.27	412414	43	0.305	1763.88	537.799	45861		43	0.305	22665.9	6910.72	589314		366553	543453		0.977029	375171		75.5129
	44	0.305	15998.5	4877.85	415960	44	0.305	1765.38	538.257	45900		44	0.305	22768.7	6942.07	591987		370060	546087		0.981765	376933		75.8677
	45	0.305	15901.6	4848.32	413442	45	0.305	1768.04	539.066	45969		45	0.305	22717.2	6926.37	590648		367473	544679		0.979233	375266		75.5321
	46	0.305	15948.8	4862.71	414669	46	0.305	1751.88	534.141	45549		46	0.305	22740.2	6933.37	591245		369120	545696		0.981062	376245		75.7292
	47	0.305	15963.2	4867.11	415044	47	0.305	1742.46	531.268	45304		47	0.305	22645.2	6904.4	588775		369740	543471		0.977062	378420		76.167
	48	0.305	16012.8	4882.22	416333	48	0.305	1748.54	533.12	45462		48	0.305	22549.7	6875.28	586292		370871	540830		0.972314	381431		76.773
	49	0.305	16044.8	4891.99	417166	49	0.305	1760.96	536.908	45785		49	0.305	22651.7	6906.4	588945		371381	543160		0.976503	380318		76.5488
	50	0.305	16030.2	4887.53	416786	50	0.305	1741.12	530.857	45269		50	0.305	22654.7	6907.3	589022		371517	543753		0.977569	380042		76.4933
	51	0.305	16086	4904.53	418235	51	0.305	1750.31	533.66	45508		51	0.305	22612.8	6894.53	587933		372727	542425		0.975181	382213		76.9304
	52	0.305	16014.5	4882.73	416376	52	0.305	1737.58	529.778	45177		52	0.305	22741.2	6933.68	591272		371199	546095		0.981779	378088		76.1001
	53	0.305	16099	4908.5	418574	53	0.305	1750.23	533.636	45506		53	0.305	22663.2	6909.9	589244		373068	543738		0.977542	381639		76.8148
	54	0.305	16143.7	4922.12	419735	54	0.305	1780.42	542.842	46291		54	0.305	22745.8	6935.07	591390		373444	545099		0.979988	381070		76.7002
	55	0.305	16097.9	4908.17	418546	55	0.305	1752.38	534.293	45562		55	0.305	22669	6911.67	589395		372984	543833		0.977712	381486		76.7841
	56	0.305	16147.4	4923.27	419833	56	0.305	1759.69	536.521	45752		56	0.305	22620.3	6896.83	588129		374081	542377		0.975095	383636		77.2167
	57	0.305	16204.3	4940.62	421313	57	0.305	1731.73	527.996	45025		57	0.305	22617.7	6896.01	588059		376288	543034		0.976276	385432		77.5782
	58	0.305	16245.8	4953.25	422390	58	0.305	1751.31	533.965	45534		58	0.305	22724.1	6928.45	590826		376856	545292		0.980335	384415		77.3736
	59	0.305	16253	4955.44	422577	59	0.305	1778.88	542.373	46251		59	0.305	22653.2	6906.83	588982		376326	542731		0.975731	385686		77.6294
	60	0.305	16280.5	4963.84	423293	60	0.305	1777.12	541.833	46205		60	0.305	22673.6	6913.07	589514		377088	543309		0.97677	386056		77.7038
	61	0.305	16232.4	4949.18	422043	61	0.305	1765.08	538.163	45892		61	0.305	22723.3	6928.21	590805		376151	544913		0.979654	383963		77.2826
	62	0.305	16326.7	4977.94	424495	62	0.305	1748.31	533.05	45456		62	0.305	22783.1	6946.45	592361		379039	546905		0.983235	385502		77.5923
	63	0.305	16297.1	4968.9	423724	63	0.305	1755.88	535.36	45653		63	0.305	22651.1	6906.2	588928		378071	543275		0.976709	387087		77.9113
	64	0.305	16310.5	4972.99	424073	64	0.305	1751.15	533.918	45530		64	0.305	22667.7	6911.27	589361		378543	543831		0.977709	387174		77.9288
	65	0.305	16359.7	4987.98	425352	65	0.305	1735.23	529.063	45116		65	0.305	22673	6912.88	589498		380236	544382		0.978699	388512		78.1981
																		0	0			#DIV/0!
																		0	0			#DIV/0!
	1	0.281	19165.6	5393.99	459974	1	0.281	1654.29	465.586	39703		1	0.281	17110.7	4815.66	410657		420271	370954	372541	0.99574	422069	422069	100
	2	0.281	19090.7	5372.91	458177	2	0.281	1672.33	470.664	40136		2	0.281	17086.6	4808.87	410078		418041	369942		0.993024	420978		99.7415
	3	0.281	19054.8	5362.8	457314	3	0.281	1686.92	474.768	40486		3	0.281	17209.5	4843.45	413027		416828	372541		1	416828		98.7583
	4	0.281	19047.4	5360.73	457138	4	0.281	1670.33	470.101	40088		4	0.281	17014.3	4788.53	408343		417050	368255		0.988495	421904		99.9609
	5	0.281	19080.9	5370.16	457942	5	0.281	1680.96	473.091	40343		5	0.281	17051	4798.86	409224		417599	368881		0.990176	421742		99.9226
	6	0.281	10334.5	2908.56	248028	6	0.281	1671.79	470.511	40123		6	0.281	17186.7	4837.05	412481		207905	372358		0.999509	208007		49.2827
	7	0.281	11383.8	3203.88	273212	7	0.281	1687.79	475.014	40507		7	0.281	17055	4799.99	409321		232705	368814		0.989996	235057		55.6915
	8	0.281	11765.5	3311.31	282373	8	0.281	1661.75	467.685	39882		8	0.281	17092.4	4810.5	410217		242491	370335		0.994079	243935		57.7952
	9	0.281	12037.8	3387.92	288906	9	0.281	1675.75	471.625	40218		9	0.281	17053.7	4799.62	409289		248688	369071		0.990686	251026		59.4751
	10	0.281	12233	3442.88	293593	10	0.281	1679.79	472.763	40315		10	0.281	16966.2	4774.99	407189		253278	366874		0.984788	257190		60.9356
	11	0.281	12390.1	3487.09	297363	11	0.281	1672.42	470.687	40138		11	0.281	16986.2	4780.62	407669		257225	367531		0.986552	260731		61.7746
	12	0.281	12510.1	3520.86	300242	12	0.281	1672	470.57	40128		12	0.281	16994	4782.8	407855		260114	367727		0.987078	263519		62.4351
	13	0.281	12652.6	3560.97	303663	13	0.281	1671	470.289	40104		13	0.281	17086	4808.72	410065		263559	369961		0.993075	265397		62.88
	14	0.281	12660.7	3563.25	303857	14	0.281	1668.54	469.597	40045		14	0.281	17017.3	4789.38	408416		263812	368371		0.988807	266798		63.212
	15	0.281	12815.1	3606.7	307562	15	0.281	1666.08	468.905	39986		15	0.281	17016.7	4789.21	408401		267576	368415		0.988925	270573		64.1063
	16	0.281	12925.7	3637.82	310216	16	0.281	1679.58	472.704	40310		16	0.281	17033.8	4794.02	408812		269906	368502		0.989158	272864		64.6492
	17	0.281	13012.7	3662.31	312305	17	0.281	1653	465.223	39672		17	0.281	17084.1	4808.18	410019		272633	370347		0.994111	274248		64.9771
	18	0.281	13049.7	3672.73	313193	18	0.281	1693.08	476.504	40634		18	0.281	17078.3	4806.55	409880		272559	369246		0.991155	274991		65.1531
	19	0.281	13223	3721.5	317352	19	0.281	1686.67	474.698	40480		19	0.281	17028.9	4792.64	408694		276872	368214		0.988385	280126		66.3696
	20	0.281	13123.3	3693.44	314959	20	0.281	1679.96	472.81	40319		20	0.281	17018.3	4789.66	408440		274640	368121		0.988136	277938		65.8512
	21	0.281	13244	3727.42	317857	21	0.281	1677.92	472.235	40270		21	0.281	16966.5	4775.09	407197		277587	366927		0.984931	281834		66.7744
	22	0.281	13296.8	3742.26	319122	22	0.281	1698.88	478.134	40773		22	0.281	16956.3	4772.21	406952		278349	366179		0.982923	283185		67.0945
	23	0.281	13357.6	3759.39	320583	23	0.281	1653.83	465.457	39692		23	0.281	17048.1	4798.05	409155		280891	369463		0.991738	283231		67.1054
	24	0.281	13342.4	3755.1	320217	24	0.281	1666.96	469.151	40007		24	0.281	17023.2	4791.02	408556		280210	368549		0.989284	283245		67.1087
	25	0.281	13485.5	3795.39	323653	25	0.281	1664.25	468.389	39942		25	0.281	16995.8	4783.32	407899		283711	367957		0.987695	287245		68.0565
	26	0.281	13455.7	3786.98	322936	26	0.281	1639.12	461.318	39339		26	0.281	16931.6	4765.25	406358		283597	367019		0.985177	287864		68.203
	27	0.281	13536.6	3809.76	324878	27	0.281	1676.33	471.79	40232		27	0.281	16985.2	4780.34	407645		284646	367413		0.986235	288619		68.3819
	28	0.281	13549.8	3813.47	325195	28	0.281	1680.04	472.833	40321		28	0.281	16955.9	4772.09	406941		284874	366620		0.984106	289475		68.5847
	29	0.281	13549.1	3813.27	325178	29	0.281	1681.79	473.326	40363		29	0.281	17064	4802.53	409537		284815	369174		0.990962	287413		68.0961
	30	0.281	13587.5	3824.07	326099	30	0.281	1655.71	465.985	39737		30	0.281	16945.5	4769.16	406692		286362	366955		0.985006	290721		68.88
	31	0.281	13565.7	3817.95	325577	31	0.281	1664.42	468.436	39946		31	0.281	17004.8	4785.86	408116		285631	368170		0.988267	289022		68.4774
	32	0.281	13586.8	3823.87	326082	32	0.281	1667.58	469.327	40022		32	0.281	16889.5	4753.39	405347		286060	365325		0.98063	291710		69.1144
	33	0.281	13696.2	3854.68	328709	33	0.281	1677.29	472.059	40255		33	0.281	16860.5	4745.24	404652		288454	364397		0.978139	294901		69.8703
	34	0.281	13748.3	3869.35	329960	34	0.281	1684.25	474.018	40422		34	0.281	16963.5	4774.24	407125		289538	366703		0.984329	294148		69.6918
	35	0.281	13738.1	3866.47	329714	35	0.281	1656.12	466.102	39747		35	0.281	17001.2	4784.84	408029		289967	368282		0.988568	293320		69.4958
	36	0.281	13832.1	3892.92	331970	36	0.281	1674.08	471.156	40178		36	0.281	16950.8	4770.64	406818		291792	366640		0.98416	296488		70.2464
	37	0.281	13822	3890.08	331728	37	0.281	1683.42	473.783	40402		37	0.281	17009	4787.05	408217		291326	367815		0.987314	295069		69.9102
	38	0.281	13930.8	3920.69	334338	38	0.281	1666.83	469.116	40004		38	0.281	16881.1	4751.03	405146		294334	365142		0.980139	300298		71.1491
	39	0.281	13833.4	3893.3	332002	39	0.281	1695	477.043	40680		39	0.281	16938.7	4767.24	406528		291322	365848		0.982034	296652		70.2851
	40	0.281	13891.5	3909.63	333395	40	0.281	1662.54	467.908	39901		40	0.281	16964.2	4774.44	407142		293494	367241		0.985773	297730		70.5405
	41	0.281	13859.2	3900.54	332620	41	0.281	1656.54	466.219	39757		41	0.281	16940.2	4767.68	406565		292863	366808		0.984611	297440		70.472
	42	0.281	13877.2	3905.63	333054	42	0.281	1653.96	465.492	39695		42	0.281	16830.5	4736.79	403931		293359	364236		0.977707	300048		71.0898
	43	0.281	13920	3917.68	334081	43	0.281	1663.96	468.307	39935		43	0.281	16936.7	4766.69	406481		294146	366546		0.983908	298957		70.8313
	44	0.281	13933.4	3921.43	334401	44	0.281	1637.25	460.79	39294		44	0.281	16917.6	4761.31	406022		295107	366728		0.984396	299785		71.0274
	45	0.281	13933.3	3921.41	334399	45	0.281	1663.96	468.307	39935		45	0.281	16855.7	4743.88	404536		294464	364601		0.978687	300877		71.2861
	46	0.281	14002.2	3940.79	336052	46	0.281	1680.5	472.962	40332		46	0.281	16872.5	4748.62	404940		295720	364608		0.978706	302154		71.5888
	47	0.281	13974.9	3933.11	335397	47	0.281	1653.71	465.422	39689		47	0.281	16894.2	4754.73	405461		295708	365772		0.98183	301180		71.3581
	48	0.281	14047.2	3953.48	337134	48	0.281	1670.54	470.16	40093		48	0.281	16881.9	4751.27	405166		297041	365073		0.979954	303117		71.817
	49	0.281	14070.1	3959.91	337683	49	0.281	1659.75	467.122	39834		49	0.281	16899.2	4756.12	405580		297849	365746		0.98176	303383		71.8799
	50	0.281	14053.9	3955.35	337294	50	0.281	1662.96	468.025	39911		50	0.281	16893.6	4754.56	405447		297383	365536		0.981197	303082		71.8086
	51	0.281	14088.7	3965.15	338129	51	0.281	1672.42	470.687	40138		51	0.281	16850.5	4742.42	404411		297991	364273		0.977806	304755		72.2049
	52	0.281	14084.8	3964.04	338035	52	0.281	1638.12	461.036	39315		52	0.281	16910	4759.16	405839		298720	366524		0.983849	303624		71.937
	53	0.281	14106.4	3970.13	338554	53	0.281	1665.88	468.846	39981		53	0.281	16917	4761.13	406007		298573	366026		0.982512	303887		71.9995
	54	0.281	14141.8	3980.1	339404	54	0.281	1655.71	465.985	39737		54	0.281	16845.2	4740.94	404285		299667	364548		0.978545	306237		72.5563
	55	0.281	14121.6	3974.4	338918	55	0.281	1657.42	466.466	39778		55	0.281	16831.5	4737.09	403957		299140	364179		0.977554	306009		72.502
	56	0.281	14095.7	3967.11	338297	56	0.281	1669.88	469.972	40077		56	0.281	16849	4742.02	404377		298220	364300		0.977879	304966		72.2551
	57	0.281	14156.2	3984.13	339748	57	0.281	1654.21	465.563	39701		57	0.281	16790.3	4725.49	402968		300047	363267		0.975106	307707		72.9044
	58	0.281	14128.8	3976.44	339092	58	0.281	1661.08	467.498	39866		58	0.281	16835	4738.08	404041		299226	364175		0.977543	306100		72.5237
	59	0.281	14169.4	3987.85	340065	59	0.281	1653.21	465.281	39677		59	0.281	16776.3	4721.54	402631		300388	362954		0.974266	308322		73.0502
	60	0.281	14163.2	3986.12	339918	60	0.281	1650.21	464.437	39605		60	0.281	16778.9	4722.28	402694		300313	363089		0.974628	308131		73.0048
	61	0.281	14169.1	3987.78	340059	61	0.281	1664.29	468.401	39943		61	0.281	16792.2	4726.02	403013		300116	363070		0.974577	307945		72.9608
	62	0.281	14220	4002.11	341281	62	0.281	1654.88	465.75	39717		62	0.281	16824.7	4735.16	403792		301564	364075		0.977275	308576		73.1104
	63	0.281	14199.9	3996.44	340798	63	0.281	1639.54	461.435	39349		63	0.281	16756	4715.84	402145		301449	362796		0.973842	309546		73.3402
	64	0.281	14249.4	4010.36	341985	64	0.281	1662.83	467.99	39908		64	0.281	16756.9	4716.08	402165		302077	362257		0.972395	310653		73.6023
	65	0.281	14202.2	3997.09	340853	65	0.281	1636.46	460.567	39275		65	0.281	16784.2	4723.76	402820		301578	363545		0.975852	309041		73.2204
																		0	0			#DIV/0!
																		0	0			#DIV/0!
	1	0.305	18160.3	5536.97	472167	1	0.305	1767.77	538.984	45962		1	0.305	18347.8	5594.16	477044		426205	431082	431082	1	426205	427268	99.7512
	2	0.305	18175.3	5541.56	472558	2	0.305	1782.69	543.534	46350		2	0.305	18345.2	5593.37	476976		426208	430626		0.998942	426659		99.8575
	3	0.305	18074.2	5510.74	469930	3	0.305	1764.38	537.952	45874		3	0.305	18264.5	5568.75	474877		424056	429003		0.995177	426111		99.7292
	4	0.305	18188.4	5545.56	472899	4	0.305	1775.73	541.411	46169		4	0.305	18334.9	5590.22	476708		426730	430539		0.99874	427268		100
	5	0.305	18155.2	5535.42	472035	5	0.305	1790.35	545.867	46549		5	0.305	18307.9	5581.98	476005		425486	429456		0.996228	427097		99.9599
	6	0.305	9592.81	2924.8	249413	6	0.305	1757	535.7	45682		6	0.305	18301.2	5579.95	475832		203731	430150		0.997838	204172		47.7855
	7	0.305	10671.4	3253.66	277457	7	0.305	1737.58	529.778	45177		7	0.305	18195.6	5547.74	473085		232280	427908		0.992637	234003		54.7672
	8	0.305	11023	3360.86	286598	8	0.305	1723.54	525.498	44812		8	0.305	18215.9	5553.93	473613		241786	428801		0.994709	243072		56.8898
	9	0.305	11358.7	3463.21	295326	9	0.305	1754.12	534.821	45607		9	0.305	18231.9	5558.81	474029		249719	428422		0.993829	251269		58.8084
	10	0.305	11551.7	3522.05	300344	10	0.305	1764	537.834	45864		10	0.305	18185.2	5544.58	472816		254480	426952		0.990419	256942		60.1359
	11	0.305	11700	3567.27	304200	11	0.305	1736.46	529.438	45148		11	0.305	18152.5	5534.59	471964		259052	426816		0.990104	261641		61.2358
	12	0.305	11801.3	3598.15	306833	12	0.305	1751.31	533.965	45534		12	0.305	18264.8	5568.86	474886		261299	429352		0.995987	262352		61.4022
	13	0.305	11937.1	3639.55	310364	13	0.305	1743.19	531.49	45323		13	0.305	18245.7	5563.01	474387		265041	429064		0.995319	266288		62.3233
	14	0.305	12007.2	3660.94	312188	14	0.305	1746.73	532.569	45415		14	0.305	18251.6	5564.81	474541		266773	429126		0.995463	267989		62.7215
	15	0.305	12142.7	3702.24	315710	15	0.305	1740.81	530.763	45261		15	0.305	18175.4	5541.58	472560		270449	427299		0.991224	272843		63.8576
	16	0.305	12272.7	3741.88	319090	16	0.305	1745.38	532.159	45380		16	0.305	18185	5544.51	472810		273710	427430		0.991528	276049		64.6078
	17	0.305	12363.6	3769.6	321454	17	0.305	1736.23	529.368	45142		17	0.305	18222.9	5556.06	473795		276312	428653		0.994365	277878		65.0359
	18	0.305	12436.7	3791.87	323353	18	0.305	1760.92	536.896	45784		18	0.305	18285.9	5575.27	475433		277569	429649		0.996676	278495		65.1803
	19	0.305	12456.5	3797.93	323870	19	0.305	1755.65	535.29	45647		19	0.305	18245.6	5562.99	474386		278223	428739		0.994565	279743		65.4726
	20	0.305	12499.9	3811.15	324997	20	0.305	1747.35	532.757	45431		20	0.305	18165.6	5538.6	472306		279566	426875		0.990241	282321		66.0759
	21	0.305	12658	3859.36	329108	21	0.305	1770	539.664	46020		21	0.305	18155.9	5535.65	472054		283088	426034		0.98829	286442		67.0404
	22	0.305	12707.3	3874.39	330390	22	0.305	1780.54	542.877	46294		22	0.305	18304.2	5580.86	475910		284096	429616		0.996599	285065		66.7181
	23	0.305	12728.5	3880.84	330940	23	0.305	1749	533.261	45474		23	0.305	18289.9	5576.5	475538		285466	430064		0.997639	286142		66.97
	24	0.305	12752.1	3888.04	331554	24	0.305	1751.12	533.906	45529		24	0.305	18180.2	5543.03	472684		286025	427155		0.99089	288655		67.5582
	25	0.305	12807.9	3905.06	333005	25	0.305	1760.19	536.674	45765		25	0.305	18263.2	5568.34	474842		287240	429077		0.995349	288582		67.5412
	26	0.305	12857.7	3920.26	334301	26	0.305	1757.31	535.794	45690		26	0.305	18223.3	5556.18	473805		288611	428115		0.993117	290611		68.0161
	27	0.305	12920.6	3939.42	335935	27	0.305	1767.19	538.808	45947		27	0.305	18237.6	5560.56	474178		289988	428231		0.993386	291919		68.3221
	28	0.305	12956.2	3950.26	336860	28	0.305	1756.42	535.524	45667		28	0.305	18185.5	5544.66	472823		291193	427156		0.990893	293869		68.7787
	29	0.305	12965.4	3953.09	337101	29	0.305	1755.96	535.384	45655		29	0.305	18130.8	5528	471402		291446	425747		0.987624	295098		69.0662
	30	0.305	13055	3980.41	339431	30	0.305	1742.5	531.279	45305		30	0.305	18183.2	5543.96	472763		294126	427458		0.991593	296620		69.4223
	31	0.305	13044.2	3977.09	339148	31	0.305	1743.15	531.479	45322		31	0.305	18245.7	5563.03	474389		293826	429067		0.995326	295206		69.0915
	32	0.305	13056.8	3980.95	339477	32	0.305	1752.19	534.234	45557		32	0.305	18097.1	5517.72	470525		293920	424968		0.985817	298149		69.7802
	33	0.305	13073.7	3986.09	339915	33	0.305	1748.5	533.109	45461		33	0.305	18132	5528.36	471433		294454	425972		0.988146	297986		69.7422
	34	0.305	13119.7	4000.13	341112	34	0.305	1745.15	532.088	45374		34	0.305	18113.5	5522.72	470952		295738	425578		0.987232	299563		70.1112
	35	0.305	13198.9	4024.28	343172	35	0.305	1735.42	529.122	45121		35	0.305	18124.1	5525.95	471227		298051	426106		0.988457	301532		70.572
	36	0.305	13135.2	4004.86	341516	36	0.305	1772.38	540.391	46082		36	0.305	18156.7	5535.87	472073		295434	425991		0.98819	298965		69.9712
	37	0.305	13237.2	4035.95	344167	37	0.305	1747.92	532.933	45446		37	0.305	18151	5534.13	471925		298721	426479		0.989322	301945		70.6688
	38	0.305	13304.2	4056.37	345908	38	0.305	1751.23	533.941	45532		38	0.305	18212.7	5552.94	473529		300376	427997		0.992844	302541		70.8082
	39	0.305	13297.6	4054.37	345738	39	0.305	1747.77	532.886	45442		39	0.305	18230.5	5558.37	473992		300296	428550		0.994126	302070		70.698
	40	0.305	13367.9	4075.81	347566	40	0.305	1741.88	531.092	45289		40	0.305	18151.5	5534.29	471938		302277	426649		0.989717	305418		71.4815
	41	0.305	13328.8	4063.9	346550	41	0.305	1775.27	541.27	46157		41	0.305	18199.7	5548.98	473191		300393	427034		0.99061	303241		70.9719
	42	0.305	13388.5	4082.07	348100	42	0.305	1722.69	525.24	44790		42	0.305	18188.7	5545.64	472906		303310	428116		0.99312	305411		71.48
	43	0.305	13443.1	4098.73	349520	43	0.305	1755.19	535.149	45635		43	0.305	18273.3	5571.43	475105		303885	429470		0.996261	305026		71.3897
	44	0.305	13391.7	4083.06	348184	44	0.305	1752.96	534.469	45577		44	0.305	18199	5548.78	473174		302607	427597		0.991916	305073		71.4009
	45	0.305	13415.9	4090.43	348813	45	0.305	1738	529.907	45188		45	0.305	18226.2	5557.08	473882		303625	428694		0.99446	305316		71.4578
	46	0.305	13365.7	4075.13	347508	46	0.305	1741.19	530.881	45271		46	0.305	18160.1	5536.93	472163		302237	426892		0.99028	305203		71.4314
	47	0.305	13414.2	4089.91	348768	47	0.305	1747.88	532.921	45445		47	0.305	18195.6	5547.74	473085		303323	427640		0.992015	305764		71.5626
	48	0.305	13417.3	4090.88	348851	48	0.305	1740.69	530.728	45258		48	0.305	18148.7	5533.44	471866		303593	426608		0.989621	306777		71.7996
	49	0.305	13473.8	4108.11	350320	49	0.305	1745.5	532.194	45383		49	0.305	18171.1	5540.27	472448		304937	427065		0.990682	307805		72.0403
	50	0.305	13552.4	4132.05	352362	50	0.305	1736.15	529.344	45140		50	0.305	18225	5556.7	473849		307222	428709		0.994495	308923		72.3018
	51	0.305	13460	4103.9	349961	51	0.305	1725.27	526.026	44857		51	0.305	18099.1	5518.31	470576		305104	425719		0.987559	308948		72.3076
	52	0.305	13526.7	4124.22	351694	52	0.305	1744.12	531.772	45347		52	0.305	18021	5494.52	468547		306347	423200		0.981716	312053		73.0344
	53	0.305	13518.3	4121.67	351477	53	0.305	1739.81	530.458	45235		53	0.305	18215.3	5553.74	473597		306242	428362		0.99369	308187		72.1295
	54	0.305	13564.4	4135.72	352675	54	0.305	1739.85	530.47	45236		54	0.305	18130.8	5527.98	471400		307439	426164		0.988591	310987		72.7849
	55	0.305	13520.5	4122.33	351533	55	0.305	1736.19	529.356	45141		55	0.305	18066.8	5508.48	469737		306392	424596		0.984954	311072		72.8049
	56	0.305	13610.6	4149.81	353876	56	0.305	1747.27	532.733	45429		56	0.305	18112	5522.27	470913		308447	425484		0.987014	312505		73.1403
	57	0.305	13614.5	4150.98	353976	57	0.305	1723.96	525.627	44823		57	0.305	18025.7	5495.95	468669		309153	423846		0.983214	314431		73.591
	58	0.305	13568.7	4137.01	352785	58	0.305	1736.27	529.38	45143		58	0.305	18099.2	5518.34	470578		307642	425435		0.9869	311725		72.9578
	59	0.305	13617.4	4151.87	354052	59	0.305	1746.08	532.37	45398		59	0.305	18170.8	5540.19	472441		308654	427043		0.990631	311573		72.9222
	60	0.305	13623.2	4153.65	354204	60	0.305	1711.85	521.933	44508		60	0.305	18127	5526.83	471302		309696	426794		0.990053	312808		73.211
	61	0.305	13638.5	4158.3	354600	61	0.305	1745.46	532.182	45382		61	0.305	18118.8	5524.33	471089		309218	425707		0.987531	313122		73.2847
	62	0.305	13613	4150.53	353938	62	0.305	1731.15	527.82	45010		62	0.305	18151.8	5534.39	471947		308928	426937		0.990385	311927		73.005
	63	0.305	13659.3	4164.66	355143	63	0.305	1722.42	525.158	44783		63	0.305	18141.5	5531.26	471680		310360	426897		0.990292	313403		73.3503
	64	0.305	13644.1	4160.02	354747	64	0.305	1726.35	526.354	44885		64	0.305	18110.5	5521.8	470873		309862	425988		0.988183	313567		73.3889
	65	0.305	13759.2	4195.1	357738	65	0.305	1736.85	529.555	45158		65	0.305	18171.5	5540.39	472458		312580	427300		0.991227	315347		73.8053
																		0	0			#DIV/0!
	1	0.235	12710.5	2980.89	254210	1	0.235	851.5	199.695	17030		1	0.235	11539.1	2706.17	230782		237180	213752	215030	0.994057	238598	241063	98.9776
	2	0.235	12796.8	3001.11	255935	2	0.235	876.3	205.511	17526		2	0.235	11577.2	2715.11	231545		238409	214019		0.995298	239535		99.3664
	3	0.235	12809	3003.99	256180	3	0.235	868.25	203.623	17365		3	0.235	11573.7	2714.28	231474		238815	214109		0.995717	239842		99.4937
	4	0.235	12774.8	2995.97	255496	4	0.235	870.6	204.174	17412		4	0.235	11489.2	2694.48	229785		238084	212373		0.987644	241063		100
	5	0.235	12785	2998.34	255699	5	0.235	866.85	203.295	17337		5	0.235	11591.9	2718.54	231837		238362	214500		0.997535	238951		99.124
	6	0.235	7391.2	1733.39	147824	6	0.235	849.55	199.238	16991		6	0.235	11538.5	2706.01	230769		130833	213778		0.994178	131599		54.5913
	7	0.235	7736.45	1814.36	154729	7	0.235	840.65	197.15	16813		7	0.235	11464	2688.55	229280		137916	212467		0.988081	139580		57.9018
	8	0.235	7955.65	1865.77	159113	8	0.235	848.4	198.968	16968		8	0.235	11526.8	2703.27	230535		142145	213567		0.993196	143119		59.3699
	9	0.235	8091.45	1897.62	161829	9	0.235	844.55	198.065	16891		9	0.235	11533.8	2704.92	230676		144938	213785		0.99421	145782		60.4748
	10	0.235	8185.65	1919.71	163713	10	0.235	860.8	201.876	17216		10	0.235	11547.6	2708.17	230953		146497	213737		0.993987	147383		61.139
	11	0.235	8253.15	1935.54	165063	11	0.235	833.2	195.403	16664		11	0.235	11573.2	2714.16	231464		148399	214800		0.99893	148558		61.6263
	12	0.235	8335.4	1954.83	166708	12	0.235	848.9	199.085	16978		12	0.235	11454.4	2686.29	229087		149730	212109		0.986416	151792		62.9678
	13	0.235	8336.15	1955.01	166723	13	0.235	840.5	197.115	16810		13	0.235	11484	2693.23	229679		149913	212869		0.98995	151435		62.8197
	14	0.235	8493.35	1991.87	169867	14	0.235	837.2	196.341	16744		14	0.235	11513.6	2700.19	230272		153123	213528		0.993015	154200		63.9668
	15	0.235	8492.05	1991.57	169841	15	0.235	837.3	196.365	16746		15	0.235	11581.3	2716.06	231626		153095	214880		0.999302	153202		63.5527
	16	0.235	8564.95	2008.66	171299	16	0.235	843.65	197.854	16873		16	0.235	11513.5	2700.15	230269		154426	213396		0.992401	155608		64.551
	17	0.235	8567.4	2009.24	171348	17	0.235	849.9	199.32	16998		17	0.235	11495	2695.81	229899		154350	212901		0.990099	155893		64.6693
	18	0.235	8591.85	2014.97	171837	18	0.235	857.05	200.997	17141		18	0.235	11435.4	2681.85	228708		154696	211567		0.983895	157228		65.2229
	19	0.235	8700.85	2040.54	174017	19	0.235	839.7	196.928	16794		19	0.235	11471	2690.2	229420		157223	212626		0.98882	159001		65.9582
	20	0.235	8787.35	2060.82	175747	20	0.235	847.6	198.78	16952		20	0.235	11478.5	2691.95	229570		158795	212618		0.988783	160596		66.6202
	21	0.235	8695.5	2039.28	173910	21	0.235	863.65	202.544	17273		21	0.235	11452.1	2685.76	229042		156637	211769		0.984835	159049		65.9783
	22	0.235	8766.75	2055.99	175335	22	0.235	837.65	196.447	16753		22	0.235	11562.4	2711.62	231247		158582	214494		0.997507	158978		65.9489
	23	0.235	8863.45	2078.67	177269	23	0.235	843.3	197.772	16866		23	0.235	11527	2703.33	230540		160403	213674		0.993694	161421		66.9622
	24	0.235	8853.1	2076.24	177062	24	0.235	833.3	195.427	16666		24	0.235	11495	2695.82	229900		160396	213234		0.991648	161747		67.0975
	25	0.235	8878.85	2082.28	177577	25	0.235	843.45	197.807	16869		25	0.235	11548.4	2708.34	230967		160708	214098		0.995666	161408		66.9567
	26	0.235	8897.95	2086.76	177959	26	0.235	840.65	197.15	16813		26	0.235	11492.7	2695.28	229854		161146	213041		0.99075	162650		67.4723
	27	0.235	8902.15	2087.74	178043	27	0.235	835.5	195.943	16710		27	0.235	11529.5	2703.93	230591		161333	213881		0.994657	162200		67.2853
	28	0.235	8956.8	2100.56	179136	28	0.235	834.25	195.65	16685		28	0.235	11550.6	2708.86	231012		162451	214327		0.996731	162984		67.6106
	29	0.235	8964.55	2102.38	179291	29	0.235	843.45	197.807	16869		29	0.235	11492	2695.12	229840		162422	212971		0.990425	163992		68.0289
	30	0.235	9010.05	2113.05	180201	30	0.235	831.6	195.028	16632		30	0.235	11498.5	2696.64	229970		163569	213338		0.992131	164866		68.3915
	31	0.235	9042.05	2120.55	180841	31	0.235	835.4	195.919	16708		31	0.235	11549.5	2708.59	230989		164133	214281		0.996517	164707		68.3253
	32	0.235	9053.2	2123.17	181064	32	0.235	843.3	197.772	16866		32	0.235	11578.9	2715.49	231577		164198	214711		0.998516	164442		68.2154
	33	0.235	9089.05	2131.58	181781	33	0.235	848.25	198.933	16965		33	0.235	11446.5	2684.46	228931		164816	211966		0.985751	167198		69.3589
	34	0.235	9057.65	2124.21	181153	34	0.235	848.55	199.003	16971		34	0.235	11556.9	2710.33	231137		164182	214166		0.995982	164844		68.3824
	35	0.235	9064.75	2125.88	181295	35	0.235	861.25	201.982	17225		35	0.235	11469.7	2689.89	229394		164070	212169		0.986695	166282		68.9789
	36	0.235	9025.05	2116.57	180501	36	0.235	832.8	195.309	16656		36	0.235	11507.2	2698.69	230144		163845	213488		0.992829	165028		68.4587
	37	0.235	9052.8	2123.08	181056	37	0.235	847.1	198.663	16942		37	0.235	11524.5	2702.74	230490		164114	213548		0.993108	165253		68.5519
	38	0.235	9062.05	2125.24	181241	38	0.235	869.45	203.905	17389		38	0.235	11483.1	2693.05	229663		163852	212274		0.987183	165979		68.8532
	39	0.235	9119.6	2138.74	182392	39	0.235	839.65	196.916	16793		39	0.235	11529.5	2703.93	230591		165599	213798		0.994271	166553		69.0913
	40	0.235	9161.4	2148.55	183228	40	0.235	854.05	200.293	17081		40	0.235	11548.3	2708.32	230966		166147	213885		0.994675	167036		69.2917
	41	0.235	9124.5	2139.89	182490	41	0.235	834.85	195.79	16697		41	0.235	11469.4	2689.82	229388		165793	212691		0.989122	167616		69.5322
	42	0.235	9103.45	2134.95	182069	42	0.235	853.6	200.188	17072		42	0.235	11481	2692.53	229619		164997	212547		0.988453	166925		69.2453
	43	0.235	9162.85	2148.89	183257	43	0.235	840.5	197.115	16810		43	0.235	11525.4	2702.94	230507		166447	213697		0.993801	167485		69.4779
	44	0.235	9155.2	2147.09	183104	44	0.235	848.4	198.968	16968		44	0.235	11527.6	2703.48	230553		166136	213585		0.99328	167260		69.3844
	45	0.235	9192.25	2155.78	183845	45	0.235	838.15	196.564	16763		45	0.235	11569.5	2713.28	231389		167082	214626		0.998121	167397		69.4411
	46	0.235	9248.9	2169.07	184978	46	0.235	855	200.516	17100		46	0.235	11586.2	2717.22	231725		167878	214625		0.998117	168195		69.7722
	47	0.235	9206.95	2159.23	184139	47	0.235	868.9	203.776	17378		47	0.235	11464.4	2688.65	229288		166761	211910		0.98549	169216		70.196
	48	0.235	9180.95	2153.13	183619	48	0.235	837.9	196.506	16758		48	0.235	11477.2	2691.66	229545		166861	212787		0.989569	168620		69.9486
	49	0.235	9308.35	2183.01	186167	49	0.235	848.6	199.015	16972		49	0.235	11448.4	2684.9	228968		169195	211996		0.98589	171616		71.1916
	50	0.235	9341.8	2190.85	186836	50	0.235	867.15	203.365	17343		50	0.235	11580	2715.77	231601		169493	214258		0.99641	170104		70.5641
	51	0.235	9301.2	2181.33	186024	51	0.235	846.95	198.628	16939		51	0.235	11588.3	2717.7	231766		169085	214827		0.999056	169245		70.2078
	52	0.235	9296.25	2180.17	185925	52	0.235	856.2	200.797	17124		52	0.235	11462.4	2688.18	229248		168801	212124		0.986486	171113		70.983
	53	0.235	9300.9	2181.26	186018	53	0.235	841.45	197.338	16829		53	0.235	11570	2713.43	231401		169189	214572		0.99787	169550		70.3345
	54	0.235	9285.8	2177.72	185716	54	0.235	846.4	198.499	16928		54	0.235	11515.1	2700.55	230303		168788	213375		0.992303	170097		70.5614
	55	0.235	9278.25	2175.95	185565	55	0.235	841.9	197.444	16838		55	0.235	11512.2	2699.87	230245		168727	213407		0.992452	170010		70.5253
	56	0.235	9346.15	2191.87	186923	56	0.235	841.8	197.42	16836		56	0.235	11518.6	2701.36	230372		170087	213536		0.993052	171277		71.0508
	57	0.235	9334.9	2189.24	186698	57	0.235	850.6	199.484	17012		57	0.235	11480.4	2692.4	229608		169686	212596		0.988681	171629		71.1967
	58	0.235	9420.8	2209.38	188416	58	0.235	855.15	200.551	17103		58	0.235	11547.1	2708.05	230943		171313	213840		0.994466	172266		71.4612
	59	0.235	9378.55	2199.47	187571	59	0.235	850.5	199.461	17010		59	0.235	11559.9	2711.03	231197		170561	214187		0.99608	171232		71.0323
	60	0.235	9359.85	2195.09	187197	60	0.235	845.3	198.241	16906		60	0.235	11506.1	2698.44	230123		170291	213217		0.991569	171739		71.2425
	61	0.235	9397.6	2203.94	187952	61	0.235	823.7	193.175	16474		61	0.235	11530.4	2704.13	230608		171478	214134		0.995833	172196		71.4318
	62	0.235	9380.8	2200	187616	62	0.235	860.75	201.864	17215		62	0.235	11549.6	2708.63	230992		170401	213777		0.994173	171400		71.1017
	63	0.235	9396.2	2203.61	187924	63	0.235	836.6	196.201	16732		63	0.235	11451	2685.52	229021		171192	212289		0.987253	173402		71.9325
	64	0.235	9398.15	2204.07	187963	64	0.235	817.85	191.803	16357		64	0.235	11532.4	2704.59	230648		171606	214291		0.996563	172198		71.4328
	65	0.235	9445.7	2215.22	188914	65	0.235	852.85	200.012	17057		65	0.235	11604.4	2721.47	232087		171857	215030		1	171857		71.2914
																		0	0			#DIV/0!
	1	0.317	13068.7	4137.62	352856	1	0.317	772.556	244.594	20859		1	0.317	12085	3826.17	326296		331997	305437	311388	0.980889	338465	338685	99.9351
	2	0.317	13106	4149.4	353861	2	0.317	776.593	245.872	20968		2	0.317	12282.1	3888.57	331617		332893	310649		0.997627	333685		98.5236
	3	0.317	13159.8	4166.44	355314	3	0.317	760.704	240.842	20539		3	0.317	12160.4	3850.05	328332		334775	307793		0.988455	338685		100
	4	0.317	13108.1	4150.08	353919	4	0.317	761.444	241.076	20559		4	0.317	12169.7	3852.99	328583		333360	308024		0.989197	337001		99.5027
	5	0.317	13106.4	4149.53	353872	5	0.317	773.37	244.852	20881		5	0.317	12152.9	3847.66	328129		332991	307248		0.986705	337478		99.6435
	6	0.317	7682.22	2432.22	207420	6	0.317	761.926	241.229	20572		6	0.317	12129	3840.1	327484		186848	306912		0.985626	189573		55.9732
	7	0.317	8063.89	2553.06	217725	7	0.317	748.37	236.937	20206		7	0.317	12152.6	3847.57	328121		197519	307915		0.988847	199747		58.9771
	8	0.317	8180.56	2590	220875	8	0.317	766.185	242.577	20687		8	0.317	12130.4	3840.52	327520		200188	306833		0.985372	203160		59.9849
	9	0.317	8306.04	2629.72	224263	9	0.317	757.185	239.728	20444		9	0.317	12163.4	3850.99	328413		203819	307969		0.98902	206082		60.8476
	10	0.317	8474.7	2683.12	228817	10	0.317	770.037	243.797	20791		10	0.317	12129.3	3840.17	327490		208026	306699		0.984942	211206		62.3607
	11	0.317	8529.11	2700.35	230286	11	0.317	761.667	241.147	20565		11	0.317	12191.4	3859.85	329168		209721	308603		0.991056	211614		62.4809
	12	0.317	8560.48	2710.28	231133	12	0.317	769.815	243.726	20785		12	0.317	12114	3835.35	327079		210348	306294		0.983641	213846		63.1402
	13	0.317	8647.63	2737.87	233486	13	0.317	751.63	237.969	20294		13	0.317	12141.2	3843.96	327813		213192	307519		0.987575	215874		63.7389
	14	0.317	8701.48	2754.92	234940	14	0.317	769.37	243.586	20773		14	0.317	12090.7	3827.97	326449		214167	305676		0.981656	218169		64.4165
	15	0.317	8811.74	2789.83	237917	15	0.317	773.482	244.887	20884		15	0.317	12162.3	3850.62	328381		217033	307497		0.987504	219779		64.8919
	16	0.317	8829.33	2795.4	238392	16	0.317	763.185	241.627	20606		16	0.317	12104	3832.19	326809		217786	306203		0.983349	221474		65.3922
	17	0.317	8844.37	2800.16	238798	17	0.317	761.518	241.1	20561		17	0.317	12097	3829.96	326619		218237	306058		0.982883	222038		65.5587
	18	0.317	8907.26	2820.07	240496	18	0.317	777.704	246.224	20998		18	0.317	12170.2	3853.13	328595		219498	307597		0.987825	222203		65.6076
	19	0.317	9019.78	2855.7	243534	19	0.317	759.185	240.361	20498		19	0.317	12258.5	3881.1	330980		223036	310482		0.99709	223687		66.0457
	20	0.317	8985.85	2844.96	242618	20	0.317	764.074	241.909	20630		20	0.317	12157.4	3849.07	328249		221988	307619		0.987896	224708		66.3471
	21	0.317	9007.33	2851.76	243198	21	0.317	761.63	241.135	20564		21	0.317	12237.8	3874.53	330420		222634	309856		0.99508	223735		66.0598
	22	0.317	8987	2845.32	242649	22	0.317	753.778	238.649	20352		22	0.317	12219.7	3868.81	329932		222297	309580		0.994194	223595		66.0186
	23	0.317	9106.33	2883.1	245871	23	0.317	763.704	241.792	20620		23	0.317	12111.7	3834.62	327017		225251	306397		0.983972	228920		67.5909
	24	0.317	9119.93	2887.41	246238	24	0.317	747.222	236.574	20175		24	0.317	12196.3	3861.39	329299		226063	309124		0.992729	227719		67.2361
	25	0.317	9178	2905.79	247806	25	0.317	772.815	244.676	20866		25	0.317	12300.3	3894.31	332107		226940	311241		0.999528	227047		67.0378
	26	0.317	9126.52	2889.49	246416	26	0.317	770.37	243.902	20800		26	0.317	12143.6	3844.71	327877		225616	307077		0.986156	228783		67.5505
	27	0.317	9153.19	2897.93	247136	27	0.317	761.926	241.229	20572		27	0.317	12191.7	3859.95	329177		226564	308605		0.991063	228607		67.4984
	28	0.317	9197.44	2911.95	248331	28	0.317	742.741	235.155	20054		28	0.317	12152.9	3847.66	328129		228277	308075		0.989361	230732		68.1258
	29	0.317	9236.26	2924.24	249379	29	0.317	747.037	236.515	20170		29	0.317	12155.3	3848.43	328194		229209	308024		0.989197	231712		68.4152
	30	0.317	9264.48	2933.17	250141	30	0.317	756.593	239.54	20428		30	0.317	12218.3	3868.37	329895		229713	309467		0.993831	231139		68.246
	31	0.317	9315.96	2949.47	251531	31	0.317	762.037	241.264	20575		31	0.317	12294.9	3892.62	331963		230956	311388		1	230956		68.1919
	32	0.317	9281.52	2938.57	250601	32	0.317	767.037	242.847	20710		32	0.317	12123.5	3838.34	327334		229891	306624		0.984701	233463		68.9321
	33	0.317	9295.52	2943	250979	33	0.317	759.333	240.408	20502		33	0.317	12062.7	3819.09	325692		230477	305190		0.980096	235158		69.4325
	34	0.317	9343.19	2958.09	252266	34	0.317	758.407	240.115	20477		34	0.317	12249.1	3878.12	330726		231789	310249		0.996342	232640		68.6892
	35	0.317	9276.33	2936.92	250461	35	0.317	754.185	238.778	20363		35	0.317	12166.9	3852.1	328507		230098	308144		0.989582	232520		68.6538
	36	0.317	9333.63	2955.06	252008	36	0.317	759.444	240.443	20505		36	0.317	12189.7	3859.32	329123		231503	308618		0.991104	233581		68.967
	37	0.317	9379.04	2969.44	253234	37	0.317	759.074	240.326	20495		37	0.317	12134.5	3841.82	327631		232739	307136		0.986345	235961		69.6697
	38	0.317	9326.48	2952.8	251815	38	0.317	760.667	240.83	20538		38	0.317	12114.5	3835.51	327092		231277	306554		0.984476	234924		69.3635
	39	0.317	9354.48	2961.67	252571	39	0.317	765.259	242.284	20662		39	0.317	12116.2	3836.04	327138		231909	306476		0.984225	235626		69.5708
	40	0.317	9455.44	2993.63	255297	40	0.317	766.444	242.659	20694		40	0.317	12173.8	3854.28	328693		234603	307999		0.989116	237184		70.0309
	41	0.317	9377.74	2969.03	253199	41	0.317	768.296	243.246	20744		41	0.317	12182.1	3856.92	328918		232455	308174		0.989678	234879		69.3503
	42	0.317	9376.41	2968.61	253163	42	0.317	756.556	239.529	20427		42	0.317	12117	3836.29	327159		232736	306732		0.985048	236269		69.7606
	43	0.317	9448.63	2991.47	255113	43	0.317	743.074	235.26	20063		43	0.317	12131.9	3841.01	327561		235050	307498		0.987508	238023		70.2787
	44	0.317	9514	3012.17	256878	44	0.317	746.296	236.28	20150		44	0.317	12138.9	3843.22	327750		236728	307600		0.987835	239643		70.7569
	45	0.317	9445.26	2990.41	255022	45	0.317	751.778	238.016	20298		45	0.317	12153.7	3847.91	328150		234724	307852		0.988644	237420		70.1005
	46	0.317	9467.93	2997.58	255634	46	0.317	754.593	238.907	20374		46	0.317	12202.1	3863.24	329457		235260	309083		0.992598	237014		69.9808
	47	0.317	9474.48	2999.66	255811	47	0.317	750.518	237.617	20264		47	0.317	12129.1	3840.11	327485		235547	307221		0.986618	238742		70.4908
	48	0.317	9505.04	3009.33	256636	48	0.317	750.63	237.652	20267		48	0.317	12168.8	3852.7	328558		236369	308291		0.990054	238743		70.4913
	49	0.317	9548.67	3023.15	257814	49	0.317	758.556	240.162	20481		49	0.317	12153	3847.69	328131		237333	307650		0.987996	240217		70.9262
	50	0.317	9476.37	3000.26	255862	50	0.317	766.482	242.671	20695		50	0.317	12149	3846.43	328024		235167	307329		0.986965	238273		70.3523
	51	0.317	9474.85	2999.78	255821	51	0.317	753.63	238.602	20348		51	0.317	12068.4	3820.91	325847		235473	305499		0.981088	240012		70.8659
	52	0.317	9502.3	3008.47	256562	52	0.317	760	240.619	20520		52	0.317	12124.9	3838.78	327371		236042	306851		0.98543	239532		70.7241
	53	0.317	9560.93	3027.03	258145	53	0.317	757.852	239.939	20462		53	0.317	12177.1	3855.33	328783		237683	308321		0.990151	240047		70.8763
	54	0.317	9490.07	3004.59	256232	54	0.317	757.296	239.763	20447		54	0.317	12139.4	3843.39	327764		235785	307317		0.986926	238908		70.54
	55	0.317	9493.07	3005.55	256313	55	0.317	759.667	240.514	20511		55	0.317	12137.1	3842.67	327703		235802	307192		0.986525	239023		70.5738
	56	0.317	9567.44	3029.09	258321	56	0.317	758.963	240.291	20492		56	0.317	12244.7	3876.72	330607		237829	310115		0.995912	238805		70.5095
	57	0.317	9599.07	3039.11	259175	57	0.317	757.333	239.775	20448		57	0.317	12175.8	3854.9	328746		238727	308298		0.990077	241120		71.1929
	58	0.317	9557.56	3025.96	258054	58	0.317	765.296	242.296	20663		58	0.317	12148.1	3846.14	327999		237391	307336		0.986987	240521		71.0161
	59	0.317	9621.78	3046.29	259788	59	0.317	767	242.835	20709		59	0.317	12230.3	3872.15	330217		239079	309508		0.993963	240531		71.0191
	60	0.317	9644.41	3053.46	260399	60	0.317	755.926	239.329	20410		60	0.317	12265.3	3883.24	331163		239989	310753		0.997961	240479		71.0038
	61	0.317	9592.89	3037.15	259008	61	0.317	760.518	240.783	20534		61	0.317	12163.2	3850.91	328406		238474	307872		0.988709	241197		71.2158
	62	0.317	9635.56	3050.66	260160	62	0.317	747.889	236.785	20193		62	0.317	12245.3	3876.91	330623		239967	310430		0.996923	240708		71.0712
	63	0.317	9615	3044.15	259605	63	0.317	754.185	238.778	20363		63	0.317	12105.7	3832.71	326854		239242	306491		0.984274	243065		71.7671
	64	0.317	9667.67	3060.82	261027	64	0.317	755.444	239.177	20397		64	0.317	12123.3	3838.27	327328		240630	306931		0.985687	244124		72.08
	65	0.317	9653.3	3056.27	260639	65	0.317	759.148	240.349	20497		65	0.317	12192.5	3860.2	329198		240142	308701		0.991371	242232		71.5214
																		0	0			#DIV/0!
	1	0.399	12583.6	5016.93	427844	1	0.399	743.853	296.564	25291		1	0.399	12628.1	5034.67	429357		402553	404066	408284	0.989669	406755	409222	99.3972
	2	0.399	12636.9	5038.17	429655	2	0.399	747.941	298.194	25430		2	0.399	12625.2	5033.51	429258		404225	403828		0.989086	408685		99.8689
	3	0.399	12665.6	5049.6	430630	3	0.399	756.824	301.735	25732		3	0.399	12638.3	5038.72	429702		404898	403970		0.989434	409222		100
	4	0.399	12550.1	5003.57	426705	4	0.399	737.118	293.879	25062		4	0.399	12629.5	5035.2	429402		401643	404340		0.99034	405561		99.1053
	5	0.399	12616.5	5030.02	428960	5	0.399	740.176	295.098	25166		5	0.399	12636.7	5038.07	429647		403794	404481		0.990685	407591		99.6013
	6	0.399	7337.77	2925.47	249484	6	0.399	742.735	296.119	25253		6	0.399	12628.3	5034.73	429362		224231	404109		0.989774	226548		55.3606
	7	0.399	7690.62	3066.15	261481	7	0.399	722.294	287.969	24558		7	0.399	12569.9	5011.43	427375		236923	402817		0.98661	240138		58.6817
	8	0.399	7843.82	3127.23	266690	8	0.399	729.029	290.654	24787		8	0.399	12599.4	5023.23	428381		241903	403594		0.988513	244714		59.7998
	9	0.399	7979.41	3181.28	271300	9	0.399	731.118	291.487	24858		9	0.399	12621.7	5032.1	429138		246442	404280		0.990193	248883		60.8185
	10	0.399	8090	3225.37	275060	10	0.399	736.059	293.457	25026		10	0.399	12650.8	5043.69	430126		250034	405100		0.992202	251999		61.5801
	11	0.399	8121.97	3238.12	276147	11	0.399	729.147	290.701	24791		11	0.399	12539.9	4999.48	426356		251356	401565		0.983543	255562		62.4506
	12	0.399	8248.97	3288.75	280465	12	0.399	733.676	292.507	24945		12	0.399	12546.7	5002.2	426588		255520	401643		0.983734	259745		63.4729
	13	0.399	8287.18	3303.99	281764	13	0.399	737.206	293.914	25065		13	0.399	12628.5	5034.81	429369		256699	404304		0.990252	259226		63.3461
	14	0.399	8316.97	3315.86	282777	14	0.399	733.118	292.284	24926		14	0.399	12580.8	5015.81	427748		257851	402822		0.986622	261347		63.8644
	15	0.399	8298.79	3308.62	282159	15	0.399	741.941	295.802	25226		15	0.399	12626.7	5034.09	429307		256933	404081		0.989706	259605		63.4388
	16	0.399	8481.68	3381.53	288377	16	0.399	749.912	298.98	25497		16	0.399	12627.5	5034.43	429336		262880	403839		0.989113	265773		64.9461
	17	0.399	8469.91	3376.84	287977	17	0.399	737.441	294.008	25073		17	0.399	12628.1	5034.64	429354		262904	404281		0.990196	265507		64.881
	18	0.399	8518.29	3396.13	289622	18	0.399	744.765	296.928	25322		18	0.399	12579	5015.09	427687		264300	402365		0.985503	268188		65.5361
	19	0.399	8464.18	3374.55	287782	19	0.399	736	293.433	25024		19	0.399	12619.2	5031.11	429053		262758	404029		0.989578	265525		64.8854
	20	0.399	8610.38	3432.84	292753	20	0.399	728.618	290.49	24773		20	0.399	12737	5078.06	433057		267980	408284		1	267980		65.4853
	21	0.399	8580.18	3420.8	291726	21	0.399	740.206	295.11	25167		21	0.399	12653.2	5044.65	430208		266559	405041		0.992057	268693		65.6595
	22	0.399	8651.56	3449.26	294153	22	0.399	730.912	291.405	24851		22	0.399	12631.6	5036.07	429476		269302	404625		0.991038	271737		66.4034
	23	0.399	8655.21	3450.71	294277	23	0.399	731.794	291.756	24881		23	0.399	12628.6	5034.86	429373		269396	404492		0.990712	271922		66.4484
	24	0.399	8694.06	3466.2	295598	24	0.399	739.912	294.993	25157		24	0.399	12576.8	5014.19	427610		270441	402453		0.985718	274359		67.0441
	25	0.399	8689.24	3464.28	295434	25	0.399	739.941	295.005	25158		25	0.399	12645.4	5041.56	429944		270276	404786		0.991432	272612		66.6171
	26	0.399	8703.53	3469.98	295920	26	0.399	715.794	285.377	24337		26	0.399	12656	5045.77	430303		271583	405966		0.994323	273134		66.7446
	27	0.399	8691.91	3465.35	295525	27	0.399	747.735	298.112	25423		27	0.399	12594.3	5021.16	428205		270102	402782		0.986524	273792		66.9054
	28	0.399	8760.62	3492.74	297861	28	0.399	721.912	287.816	24545		28	0.399	12652.7	5044.45	430191		273316	405646		0.993539	275093		67.2235
	29	0.399	8766.47	3495.07	298060	29	0.399	734.971	293.023	24989		29	0.399	12560.1	5007.55	427044		273071	402055		0.984743	277302		67.7632
	30	0.399	8780.97	3500.86	298553	30	0.399	734.941	293.011	24988		30	0.399	12655	5045.37	430269		273565	405281		0.992645	275592		67.3454
	31	0.399	8765.06	3494.51	298012	31	0.399	736.971	293.82	25057		31	0.399	12632	5036.22	429489		272955	404432		0.990565	275555		67.3363
	32	0.399	8798.32	3507.77	299143	32	0.399	741.029	295.438	25195		32	0.399	12602.1	5024.28	428471		273948	403276		0.987734	277350		67.775
	33	0.399	8741.15	3484.98	297199	33	0.399	734.706	292.917	24980		33	0.399	12562.5	5008.5	427125		272219	402145		0.984964	276375		67.5366
	34	0.399	8827.47	3519.39	300134	34	0.399	737.618	294.078	25079		34	0.399	12591	5019.85	428093		275055	403014		0.987092	278652		68.0931
	35	0.399	8871.94	3537.12	301646	35	0.399	728.971	290.631	24785		35	0.399	12666.3	5049.87	430653		276861	405868		0.994083	278509		68.0582
	36	0.399	8862.41	3533.32	301322	36	0.399	739.706	294.911	25150		36	0.399	12590.2	5019.53	428066		276172	402916		0.986852	279851		68.3862
	37	0.399	8836.94	3523.17	300456	37	0.399	735.176	293.105	24996		37	0.399	12605.9	5025.81	428601		275460	403605		0.98854	278653		68.0935
	38	0.399	8880.79	3540.65	301947	38	0.399	727.529	290.056	24736		38	0.399	12582.2	5016.36	427795		277211	403059		0.987203	280805		68.6191
	39	0.399	8901.76	3549.01	302660	39	0.399	735.353	293.175	25002		39	0.399	12569.9	5011.44	427376		277658	402374		0.985525	281736		68.8468
	40	0.399	8934.09	3561.9	303759	40	0.399	741.324	295.556	25205		40	0.399	12647.2	5042.26	430004		278554	404799		0.991464	280952		68.6552
	41	0.399	8913.79	3553.81	303069	41	0.399	734.088	292.671	24959		41	0.399	12563.5	5008.91	427160		278110	402201		0.985101	282316		68.9885
	42	0.399	8911.35	3552.84	302986	42	0.399	742.794	296.142	25255		42	0.399	12633	5036.61	429522		277731	404267		0.990161	280491		68.5424
	43	0.399	8905.15	3550.36	302775	43	0.399	725.471	289.235	24666		43	0.399	12566.1	5009.95	427249		278109	402583		0.986037	282047		68.9228
	44	0.399	8985.47	3582.39	305506	44	0.399	737.029	293.844	25059		44	0.399	12660.2	5047.47	430448		280447	405389		0.992909	282450		69.0212
	45	0.399	8956.18	3570.71	304510	45	0.399	737.206	293.914	25065		45	0.399	12588.7	5018.95	428016		279445	402951		0.986938	283143		69.1907
	46	0.399	8938.21	3563.54	303899	46	0.399	729.471	290.83	24802		46	0.399	12546.7	5002.2	426588		279097	401786		0.984085	283611		69.3049
	47	0.399	8939.74	3564.15	303951	47	0.399	722.265	287.957	24557		47	0.399	12548.3	5002.84	426642		279394	402085		0.984817	283701		69.327
	48	0.399	8988.41	3583.56	305606	48	0.399	738.971	294.618	25125		48	0.399	12647.7	5042.46	430021		280481	404896		0.991702	282828		69.1136
	49	0.399	8981.65	3580.86	305376	49	0.399	743.412	296.388	25276		49	0.399	12586	5017.88	427925		280100	402649		0.986198	284020		69.4049
	50	0.399	9034.06	3601.76	307158	50	0.399	738.5	294.43	25109		50	0.399	12683.8	5056.85	431248		282049	406139		0.994746	283539		69.2873
	51	0.399	9019.5	3595.95	306663	51	0.399	740.441	295.204	25175		51	0.399	12637.1	5038.26	429663		281488	404488		0.990703	284130		69.4317
	52	0.399	9028.29	3599.46	306962	52	0.399	740.559	295.251	25179		52	0.399	12605.9	5025.78	428599		281783	403420		0.988087	285180		69.6885
	53	0.399	9029.91	3600.1	307017	53	0.399	731.735	291.733	24879		53	0.399	12624.7	5033.29	429239		282138	404360		0.990389	284876		69.614
	54	0.399	9088.62	3623.51	309013	54	0.399	732.382	291.991	24901		54	0.399	12574.7	5013.38	427541		284112	402640		0.986176	288095		70.4006
	55	0.399	9058.97	3611.69	308005	55	0.399	732.147	291.897	24893		55	0.399	12621.1	5031.86	429117		283112	404224		0.990056	285956		69.8779
	56	0.399	9102.12	3628.89	309472	56	0.399	742.794	296.142	25255		56	0.399	12667.6	5050.42	430700		284217	405445		0.993047	286207		69.9393
	57	0.399	9047.32	3607.05	307609	57	0.399	731.118	291.487	24858		57	0.399	12581.6	5016.11	427774		282751	402916		0.986852	286518		70.0153
	58	0.399	9077.56	3619.1	308637	58	0.399	726.265	289.552	24693		58	0.399	12614.8	5029.34	428902		283944	404209		0.990019	286807		70.0858
	59	0.399	9062.85	3613.24	308137	59	0.399	732.471	292.026	24904		59	0.399	12581.2	5015.97	427762		283233	402858		0.98671	287048		70.1448
	60	0.399	9001.18	3588.65	306040	60	0.399	720.647	287.312	24502		60	0.399	12567.2	5010.36	427284		281538	402782		0.986524	285384		69.7382
	61	0.399	9103.68	3629.51	309525	61	0.399	728.529	290.455	24770		61	0.399	12611.8	5028.14	428800		284755	404030		0.989581	287753		70.3171
	62	0.399	9120.97	3636.41	310113	62	0.399	744.588	296.857	25316		62	0.399	12663.4	5048.72	430555		284797	405239		0.992542	286937		70.1177
	63	0.399	9140.41	3644.16	310774	63	0.399	735.912	293.398	25021		63	0.399	12713	5068.51	432243		285753	407222		0.997399	286498		70.0105
	64	0.399	9150	3647.98	311100	64	0.399	743.941	296.599	25294		64	0.399	12685.3	5057.44	431299		285806	406005		0.994418	287410		70.2334
	65	0.399	9085.91	3622.43	308921	65	0.399	737.294	293.949	25068		65	0.399	12611.6	5028.06	428793		283853	403725		0.988834	287058		70.1474
																		0	0			#DIV/0!
	1	0.129	12823	1654	141053	1	0.129	811.545	104.679	8927		1	0.129	13404.8	1729.05	147453		132126	138526	139347	0.994108	132909	133824	99.3165
	2	0.129	12838.7	1656.03	141226	2	0.129	792.818	102.263	8721		2	0.129	13412.8	1730.08	147541		132505	138820		0.996218	133008		99.3905
	3	0.129	12792.7	1650.09	140720	3	0.129	801.091	103.33	8812		3	0.129	13379.3	1725.75	147172		131908	138360		0.992917	132849		99.2716
	4	0.129	12813.7	1652.8	140951	4	0.129	814.909	105.113	8964		4	0.129	13371.1	1724.69	147082		131987	138118		0.99118	133161		99.5051
	5	0.129	12838.7	1656.03	141226	5	0.129	772.636	99.66	8499		5	0.129	13336.7	1720.26	146704		132727	138205		0.991805	133824		100
	6	0.129	7606.45	981.132	83671	6	0.129	776.818	100.199	8545		6	0.129	13379.6	1725.8	147176		75126	138631		0.994862	75514		56.428
	7	0.129	8056.27	1039.15	88619	7	0.129	788.727	101.735	8676		7	0.129	13289.3	1714.14	146182		79943	137506		0.986788	81013.3		60.5373
	8	0.129	8048.45	1038.14	88533	8	0.129	819.091	105.652	9010		8	0.129	13307.7	1716.52	146385		79523	137375		0.985848	80664.5		60.2767
	9	0.129	8401.55	1083.69	92417	9	0.129	797.182	102.826	8769		9	0.129	13433.8	1732.79	147772		83648	139003		0.997531	83855		62.6608
	10	0.129	8464.73	1091.84	93112	10	0.129	776.727	100.188	8544		10	0.129	13376.5	1725.39	147141		84568	138597		0.994618	85025.6		63.5355
	11	0.129	8552.91	1103.21	94082	11	0.129	780.545	100.68	8586		11	0.129	13386.2	1726.64	147248		85496	138662		0.995084	85918.4		64.2026
	12	0.129	8627.55	1112.84	94903	12	0.129	783.364	101.044	8617		12	0.129	13439.4	1733.5	147833		86286	139216		0.99906	86367.2		64.538
	13	0.129	8646.73	1115.31	95114	13	0.129	765.273	98.71	8418		13	0.129	13201.4	1702.8	145215		86696	136797		0.9817	88312.1		65.9913
	14	0.129	8832.55	1139.28	97158	14	0.129	790.182	101.923	8692		14	0.129	13434.6	1732.89	147781		88466	139089		0.998149	88630.1		66.229
	15	0.129	8762.55	1130.25	96388	15	0.129	799.091	103.072	8790		15	0.129	13360.4	1723.31	146964		87598	138174		0.991582	88341.6		66.0134
	16	0.129	8848.55	1141.35	97334	16	0.129	779.455	100.539	8574		16	0.129	13285.5	1713.66	146141		88760	137567		0.987226	89908.5		67.1843
	17	0.129	8937.73	1152.85	98315	17	0.129	798.727	103.025	8786		17	0.129	13322.5	1718.42	146547		89529	137761		0.988618	90559.7		67.6709
	18	0.129	8976.55	1157.86	98742	18	0.129	809	104.35	8899		18	0.129	13389	1727.01	147279		89843	138380		0.99306	90470.8		67.6045
	19	0.129	8989.36	1159.51	98883	19	0.129	800.091	103.201	8801		19	0.129	13445.5	1734.29	147900		90082	139099		0.99822	90242.6		67.4339
	20	0.129	8942.36	1153.45	98366	20	0.129	780.455	100.668	8585		20	0.129	13327.5	1719.08	146603		89781	138018		0.990463	90645.5		67.735
	21	0.129	9007.27	1161.82	99080	21	0.129	775.182	99.988	8527		21	0.129	13403.2	1728.83	147435		90553	138908		0.99685	90839.2		67.8797
	22	0.129	8971.45	1157.2	98686	22	0.129	787.182	101.536	8659		22	0.129	13339.1	1720.57	146730		90027	138071		0.990843	90859		67.8945
	23	0.129	9119	1176.23	100309	23	0.129	776.455	100.152	8541		23	0.129	13359.5	1723.19	146954		91768	138413		0.993297	92387.2		69.0365
	24	0.129	9084.45	1171.78	99929	24	0.129	783.455	101.055	8618		24	0.129	13342.4	1720.99	146766		91311	138148		0.991396	92103.5		68.8245
	25	0.129	9171	1182.94	100881	25	0.129	793.273	102.322	8726		25	0.129	13368.5	1724.35	147053		92155	138327		0.99268	92834.5		69.3708
	26	0.129	9072.18	1170.19	99794	26	0.129	783.636	101.079	8620		26	0.129	13351.4	1722.15	146865		91174	138245		0.992092	91900.8		68.673
	27	0.129	9183.09	1184.5	101014	27	0.129	762.818	98.393	8391		27	0.129	13367.3	1724.2	147040		92623	138649		0.994991	93089.3		69.5611
	28	0.129	9167.91	1182.54	100847	28	0.129	784.455	101.184	8629		28	0.129	13324.9	1718.74	146574		92218	137945		0.989939	93155.3		69.6104
	29	0.129	9232.09	1190.82	101553	29	0.129	788.545	101.712	8674		29	0.129	13355	1722.62	146905		92879	138231		0.991991	93628.9		69.9643
	30	0.129	9270.64	1195.79	101977	30	0.129	794	102.416	8734		30	0.129	13307.5	1716.5	146383		93243	137649		0.987815	94393.2		70.5355
	31	0.129	9241.64	1192.05	101658	31	0.129	799.818	103.166	8798		31	0.129	13389.1	1727.02	147280		92860	138482		0.993792	93440		69.8232
	32	0.129	9375.45	1209.31	103130	32	0.129	781.091	100.75	8592		32	0.129	13449	1734.74	147939		94538	139347		1	94538		70.6437
	33	0.129	9262.45	1194.73	101887	33	0.129	784.455	101.184	8629		33	0.129	13341.8	1720.92	146760		93258	138131		0.991274	94079		70.3007
	34	0.129	9412.55	1214.09	103538	34	0.129	809.545	104.421	8905		34	0.129	13410.4	1729.76	147514		94633	138609		0.994704	95136.9		71.0912
	35	0.129	9397.18	1212.11	103369	35	0.129	775.727	100.059	8533		35	0.129	13351.5	1722.17	146867		94836	138334		0.99273	95530.5		71.3853
	36	0.129	9423.09	1215.45	103654	36	0.129	781.545	100.809	8597		36	0.129	13337.7	1720.39	146715		95057	138118		0.99118	95902.8		71.6635
	37	0.129	9379.27	1209.8	103172	37	0.129	794.818	102.521	8743		37	0.129	13389.8	1727.11	147288		94429	138545		0.994245	94975.6		70.9707
	38	0.129	9399.82	1212.45	103398	38	0.129	773.727	99.801	8511		38	0.129	13332.6	1719.73	146659		94887	138148		0.991396	95710.5		71.5198
	39	0.129	9380	1209.9	103180	39	0.129	789.182	101.794	8681		39	0.129	13325.6	1718.83	146582		94499	137901		0.989623	95489.9		71.355
	40	0.129	9503.45	1225.82	104538	40	0.129	776.364	100.141	8540		40	0.129	13293.5	1714.68	146228		95998	137688		0.988094	97154.7		72.599
	41	0.129	9500.73	1225.47	104508	41	0.129	815.909	105.242	8975		41	0.129	13316.9	1717.71	146486		95533	137511		0.986824	96808.5		72.3403
	42	0.129	9471.64	1221.72	104188	42	0.129	779.727	100.575	8577		42	0.129	13204.1	1703.15	145245		95611	136668		0.980775	97485.2		72.846
	43	0.129	9492	1224.34	104412	43	0.129	790.545	101.97	8696		43	0.129	13340	1720.68	146740		95716	138044		0.990649	96619.5		72.199
	44	0.129	9396.91	1212.08	103366	44	0.129	781.818	100.844	8600		44	0.129	13349.8	1721.95	146848		94766	138248		0.992113	95519.3		71.377
	45	0.129	9448.73	1218.76	103936	45	0.129	787	101.513	8657		45	0.129	13291.1	1714.38	146202		95279	137545		0.987068	96527.3		72.1302
	46	0.129	9515.55	1227.38	104671	46	0.129	792	102.158	8712		46	0.129	13365.4	1723.96	147019		95959	138307		0.992537	96680.6		72.2447
	47	0.129	9574.91	1235.04	105324	47	0.129	767.636	99.015	8444		47	0.129	13412.1	1729.98	147533		96880	139089		0.998149	97059.7		72.528
	48	0.129	9522.82	1228.32	104751	48	0.129	786.727	101.477	8654		48	0.129	13326.7	1718.97	146594		96097	137940		0.989903	97077.2		72.5411
	49	0.129	9503.36	1225.81	104537	49	0.129	786.091	101.395	8647		49	0.129	13380.3	1725.88	147183		95890	138536		0.99418	96451.3		72.0734
	50	0.129	9482.91	1223.17	104312	50	0.129	787	101.513	8657		50	0.129	13365.8	1724.01	147024		95655	138367		0.992967	96332.5		71.9846
	51	0.129	9614.45	1240.14	105759	51	0.129	825	106.414	9075		51	0.129	13410.5	1729.77	147515		96684	138440		0.993491	97317.4		72.7206
	52	0.129	9568.91	1234.26	105258	52	0.129	776.545	100.164	8542		52	0.129	13404.5	1729.01	147450		96716	138908		0.99685	97021.7		72.4996
	53	0.129	9570.09	1234.42	105271	53	0.129	776.273	100.129	8539		53	0.129	13316.9	1717.71	146486		96732	137947		0.989953	97713.7		73.0167
	54	0.129	9578.82	1235.54	105367	54	0.129	773.364	99.754	8507		54	0.129	13299.2	1715.42	146291		96860	137784		0.988783	97958.8		73.1998
	55	0.129	9491	1224.21	104401	55	0.129	795	102.545	8745		55	0.129	13277.3	1712.59	146050		95656	137305		0.985346	97078.6		72.5421
	56	0.129	9709.73	1252.43	106807	56	0.129	790.455	101.958	8695		56	0.129	13426.2	1731.8	147688		98112	138993		0.99746	98361.9		73.5011
	57	0.129	9585.09	1236.35	105436	57	0.129	785.727	101.348	8643		57	0.129	13346.1	1721.47	146807		96793	138164		0.99151	97621.8		72.948
	58	0.129	9667.64	1247	106344	58	0.129	801.273	103.354	8814		58	0.129	13241.3	1707.95	145654		97530	136840		0.982009	99316.8		74.2146
	59	0.129	9617.27	1240.5	105790	59	0.129	795.818	102.65	8754		59	0.129	13289.6	1714.19	146186		97036	137432		0.986257	98388.1		73.5207
	60	0.129	9732.73	1255.39	107060	60	0.129	787.636	101.595	8664		60	0.129	13393.5	1727.59	147329		98396	138665		0.995106	98879.9		73.8882
	61	0.129	9675.91	1248.07	106435	61	0.129	788.909	101.759	8678		61	0.129	13377.7	1725.55	147155		97757	138477		0.993757	98371.2		73.508
	62	0.129	9645.36	1244.12	106099	62	0.129	794.545	102.486	8740		62	0.129	13358.3	1723.04	146941		97359	138201		0.991776	98166.3		73.3549
	63	0.129	9656	1245.5	106216	63	0.129	776.545	100.164	8542		63	0.129	13303.5	1715.97	146338		97674	137796		0.98887	98773.4		73.8086
	64	0.129	9668.73	1247.14	106356	64	0.129	791.727	102.122	8709		64	0.129	13296.1	1715.02	146257		97647	137548		0.98709	98924.1		73.9212
	65	0.129	9701.64	1251.38	106718	65	0.129	792.636	102.24	8719		65	0.129	13361.4	1723.44	146975		97999	138256		0.992171	98772.3		73.8078
																		0	0			#DIV/0!
	1	0.188	12889.2	2418.23	206227	1	0.188	838	157.223	13408		1	0.188	12046.8	2260.19	192749		192819	179341	181186	0.989817	194803	195037	99.88
	2	0.188	12806.6	2402.74	204906	2	0.188	845.5	158.63	13528		2	0.188	11962.8	2244.43	191405		191378	177877		0.981737	194938		99.9494
	3	0.188	12784.2	2398.53	204547	3	0.188	844.688	158.478	13515		3	0.188	12060.2	2262.71	192964		191032	179449		0.990413	192881		98.8947
	4	0.188	12814.7	2404.26	205035	4	0.188	818.312	153.529	13093		4	0.188	11962.8	2244.42	191404		191942	178311		0.984132	195037		100
	5	0.188	12771.2	2396.09	204339	5	0.188	853.688	160.166	13659		5	0.188	11982.2	2248.08	191716		190680	178057		0.98273	194031		99.4842
	6	0.188	7399.94	1388.36	118399	6	0.188	829.875	155.699	13278		6	0.188	11921.1	2236.61	190738		105121	177460		0.979435	107328		55.0297
	7	0.188	7849	1472.61	125584	7	0.188	804.25	150.891	12868		7	0.188	11993.9	2250.27	191903		112716	179035		0.988128	114070		58.4865
	8	0.188	8065.88	1513.3	129054	8	0.188	811.125	152.181	12978		8	0.188	12015.4	2254.3	192247		116076	179269		0.98942	117317		60.1513
	9	0.188	8228.69	1543.84	131659	9	0.188	824.125	154.62	13186		9	0.188	12006	2252.53	192096		118473	178910		0.987438	119980		61.5167
	10	0.188	8278.88	1553.26	132462	10	0.188	816.812	153.248	13069		10	0.188	11947.9	2241.63	191166		119393	178097		0.982951	121464		62.2774
	11	0.188	8364.75	1569.37	133836	11	0.188	811.688	152.287	12987		11	0.188	11990	2249.53	191840		120849	178853		0.987124	122425		62.7704
	12	0.188	8504.25	1595.54	136068	12	0.188	814.688	152.849	13035		12	0.188	12024	2255.91	192384		123033	179349		0.989861	124293		63.7281
	13	0.188	8542.06	1602.64	136673	13	0.188	810.75	152.111	12972		13	0.188	11986	2248.78	191776		123701	178804		0.986853	125349		64.2694
	14	0.188	8574.5	1608.72	137192	14	0.188	833.812	156.438	13341		14	0.188	11959.8	2243.87	191357		123851	178016		0.982504	126056		64.6321
	15	0.188	8638.12	1620.66	138210	15	0.188	797.812	149.683	12765		15	0.188	11977.8	2247.23	191644		125445	178879		0.987267	127063		65.1482
	16	0.188	8668.44	1626.35	138695	16	0.188	816.688	153.225	13067		16	0.188	12129.7	2275.74	194075		125628	181008		0.999018	125752		64.4758
	17	0.188	8700.5	1632.36	139208	17	0.188	822.062	154.233	13153		17	0.188	12077.4	2265.92	193238		126055	180085		0.993923	126826		65.0265
	18	0.188	8728.12	1637.55	139650	18	0.188	819.188	153.694	13107		18	0.188	11959.1	2243.74	191346		126543	178239		0.983735	128635		65.9544
	19	0.188	8718.38	1635.72	139494	19	0.188	811.375	152.228	12982		19	0.188	11953.7	2242.72	191259		126512	178277		0.983945	128576		65.9241
	20	0.188	8854.5	1661.26	141672	20	0.188	811.562	152.263	12985		20	0.188	12026.6	2256.39	192425		128687	179440		0.990363	129939		66.6229
	21	0.188	8844.94	1659.46	141519	21	0.188	815.562	153.014	13049		21	0.188	11983.6	2248.33	191738		128470	178689		0.986219	130265		66.7901
	22	0.188	8916.62	1672.91	142666	22	0.188	819.062	153.67	13105		22	0.188	11959	2243.71	191344		129561	178239		0.983735	131703		67.5273
	23	0.188	8906.25	1670.97	142500	23	0.188	827.75	155.3	13244		23	0.188	11975.1	2246.73	191601		129256	178357		0.984386	131306		67.3238
	24	0.188	8905.19	1670.77	142483	24	0.188	829.625	155.652	13274		24	0.188	11981.9	2248.02	191711		129209	178437		0.984828	131200		67.2692
	25	0.188	9004.44	1689.39	144071	25	0.188	822.875	154.385	13166		25	0.188	11995.9	2250.63	191934		130905	178768		0.986655	132676		68.0259
	26	0.188	9019.31	1692.18	144309	26	0.188	819.5	153.752	13112		26	0.188	12104.3	2270.98	193669		131197	180557		0.996528	131654		67.5022
	27	0.188	8930.94	1675.6	142895	27	0.188	810.375	152.04	12966		27	0.188	12051.9	2261.15	192831		129929	179865		0.992709	130883		67.107
	28	0.188	9128.56	1712.67	146057	28	0.188	838.188	157.258	13411		28	0.188	12062.1	2263.06	192994		132646	179583		0.991153	133830		68.6178
	29	0.188	9060.19	1699.85	144963	29	0.188	811.125	152.181	12978		29	0.188	12016	2254.41	192256		131985	179278		0.989469	133390		68.3921
	30	0.188	9100.56	1707.42	145609	30	0.188	818	153.471	13088		30	0.188	12036.1	2258.17	192577		132521	179489		0.990634	133774		68.5891
	31	0.188	9149.06	1716.52	146385	31	0.188	818.125	153.494	13090		31	0.188	11892.9	2231.31	190286		133295	177196		0.977978	136296		69.8824
	32	0.188	9131.75	1713.27	146108	32	0.188	814.375	152.791	13030		32	0.188	12037.1	2258.36	192593		133078	179563		0.991042	134281		68.849
	33	0.188	9157.69	1718.14	146523	33	0.188	808.375	151.665	12934		33	0.188	12084.8	2267.31	193356		133589	180422		0.995783	134155		68.7843
	34	0.188	9250.25	1735.51	148004	34	0.188	845.25	158.583	13524		34	0.188	12081.1	2266.61	193297		134480	179773		0.992201	135537		69.493
	35	0.188	9199.38	1725.96	147190	35	0.188	809.125	151.806	12946		35	0.188	11951.3	2242.27	191221		134244	178275		0.983934	136436		69.954
	36	0.188	9143.38	1715.45	146294	36	0.188	833.438	156.367	13335		36	0.188	11959.8	2243.87	191357		132959	178022		0.982537	135322		69.3829
	37	0.188	9237.75	1733.16	147804	37	0.188	809	151.782	12944		37	0.188	11949.2	2241.89	191188		134860	178244		0.983763	137086		70.2872
	38	0.188	9226	1730.96	147616	38	0.188	815.438	152.99	13047		38	0.188	12039.2	2258.77	192628		134569	179581		0.991142	135772		69.6134
	39	0.188	9317.69	1748.16	149083	39	0.188	828.375	155.417	13254		39	0.188	12054.8	2261.69	192877		135829	179623		0.991374	137011		70.2488
	40	0.188	9204.06	1726.84	147265	40	0.188	824.125	154.62	13186		40	0.188	11890.7	2230.9	190251		134079	177065		0.977255	137200		70.3455
	41	0.188	9228.69	1731.46	147659	41	0.188	824.938	154.772	13199		41	0.188	11927.2	2237.74	190835		134460	177636		0.980407	137147		70.3186
	42	0.188	9315.75	1747.8	149052	42	0.188	830.812	155.875	13293		42	0.188	12043.9	2259.64	192702		135759	179409		0.990192	137104		70.2963
	43	0.188	9288.56	1742.69	148617	43	0.188	819.688	153.787	13115		43	0.188	12001.6	2251.7	192025		135502	178910		0.987438	137226		70.3589
	44	0.188	9292.31	1743.4	148677	44	0.188	827.188	155.195	13235		44	0.188	11962.4	2244.36	191399		135442	178164		0.983321	137739		70.6222
	45	0.188	9357.12	1755.56	149714	45	0.188	812.438	152.427	12999		45	0.188	12013.2	2253.89	192212		136715	179213		0.989111	138220		70.8688
	46	0.188	9374.88	1758.89	149998	46	0.188	819	153.658	13104		46	0.188	11960.9	2244.08	191375		136894	178271		0.983912	139132		71.3365
	47	0.188	9333.75	1751.17	149340	47	0.188	794.938	149.144	12719		47	0.188	11863.9	2225.87	189822		136621	177103		0.977465	139771		71.6638
	48	0.188	9364.19	1756.88	149827	48	0.188	820.875	154.01	13134		48	0.188	11968.4	2245.49	191495		136693	178361		0.984408	138858		71.1958
	49	0.188	9405.19	1764.58	150483	49	0.188	819.562	153.764	13113		49	0.188	11976.6	2247.01	191625		137370	178512		0.985242	139428		71.4879
	50	0.188	9386.31	1761.03	150181	50	0.188	805.188	151.067	12883		50	0.188	11958.9	2243.7	191343		137298	178460		0.984955	139395		71.4713
	51	0.188	9405.38	1764.61	150486	51	0.188	813.75	152.673	13020		51	0.188	11978.6	2247.4	191658		137466	178638		0.985937	139427		71.4874
	52	0.188	9418.62	1767.1	150698	52	0.188	817.375	153.354	13078		52	0.188	11975.8	2246.87	191613		137620	178535		0.985369	139663		71.6088
	53	0.188	9379.44	1759.74	150071	53	0.188	805.25	151.079	12884		53	0.188	11923.3	2237.02	190773		137187	177889		0.981803	139730		71.6427
	54	0.188	9414.62	1766.35	150634	54	0.188	818.938	153.647	13103		54	0.188	11927.7	2237.84	190843		137531	177740		0.980981	140197		71.8826
	55	0.188	9386.69	1761.1	150187	55	0.188	793.75	148.921	12700		55	0.188	11955.4	2243.05	191287		137487	178587		0.985656	139488		71.5187
	56	0.188	9520.38	1786.19	152326	56	0.188	809.938	151.958	12959		56	0.188	12033.2	2257.64	192532		139367	179573		0.991098	140619		72.0986
	57	0.188	9446.94	1772.41	151151	57	0.188	820.875	154.01	13134		57	0.188	11954.9	2242.95	191279		138017	178145		0.983216	140373		71.9726
	58	0.188	9517.81	1785.7	152285	58	0.188	812.75	152.486	13004		58	0.188	11948.6	2241.76	191177		139281	178173		0.983371	141636		72.6203
	59	0.188	9482.38	1779.06	151718	59	0.188	814.375	152.791	13030		59	0.188	11953.9	2242.76	191263		138688	178233		0.983702	140986		72.2868
	60	0.188	9558.12	1793.27	152930	60	0.188	812.688	152.474	13003		60	0.188	12005.4	2252.41	192086		139927	179083		0.988393	141570		72.5864
	61	0.188	9506.31	1783.55	152101	61	0.188	821.375	154.104	13142		61	0.188	12145.5	2278.7	194328		138959	181186		1	138959		71.2476
	62	0.188	9577.62	1796.93	153242	62	0.188	817.375	153.354	13078		62	0.188	12007.5	2252.81	192120		140164	179042		0.988167	141842		72.726
	63	0.188	9527.75	1787.57	152444	63	0.188	828.938	155.523	13263		63	0.188	12048.4	2260.48	192774		139181	179511		0.990755	140480		72.0273
	64	0.188	9440.75	1771.25	151052	64	0.188	833	156.285	13328		64	0.188	11918.1	2236.03	190689		137724	177361		0.978889	140694		72.1373
	65	0.188	9495.25	1781.47	151924	65	0.188	810.188	152.005	12963		65	0.188	11986	2248.78	191776		138961	178813		0.986903	140805		72.1941
