# Supplementary material for: La pintura de Europa Oriental (1917-1989)
Source: eLife journal article supplement (doi:10.7554/elife.83062), 1990-01-01
Supplement: fig7-data1 [file LLPS_line scan.xlsx]

## Sheet: Line scan_droplets
1			2			3			4			5			6			7			8			9			10			11			12			13			14
0	12499		0	13533		0	7917		0	6401		0	5885		0	5321		0	10574		0	8924		0	15979		0	8975		0	13766		0	13724		0	15631		0	23294
0.1083	13460.3		0.10829	14796.3		0.1083	8310.69		0.1083	6596.49		0.10829	6340.12		0.10829	5885.14		0.1083	11103.6		0.1083	9355.57		0.1083	16453.9		0.1083	8983.12		0.1083	13965.4		0.1083	14532.4		0.1083	16393.5		0.1083	24769.6
0.2166	14733.8		0.21658	16960.3		0.2166	9236.65		0.2166	6743.74		0.21658	6974.27		0.21658	6259		0.2166	11661.7		0.2166	10166.8		0.2166	17000.2		0.2166	9163.02		0.2166	14503.2		0.2166	15244		0.2166	17009.2		0.2166	26327.8
0.3249	16763.7		0.32487	19728.7		0.3249	10221.9		0.3249	6960.86		0.32487	7678.31		0.32487	6937.52		0.3249	12636.3		0.3249	10599		0.3249	17844.1		0.3249	9357.35		0.3249	15232.6		0.3249	15799.1		0.3249	17709.5		0.3249	28124.6
0.4332	19013.1		0.43316	23356.9		0.4332	11438.9		0.4332	7426.41		0.43316	8835.9		0.43316	7684.5		0.4332	13361.2		0.4332	11557.8		0.4332	18690.8		0.4332	9498.04		0.4332	15767.8		0.4332	16299.7		0.4332	18634		0.4332	30354.2
0.5415	21686.4		0.54145	28055.1		0.5415	13124.8		0.5415	7557.18		0.54145	10248		0.54145	8934.94		0.5415	14515		0.5415	12502.7		0.5415	19290.7		0.5415	9886.63		0.5415	16253.5		0.5415	17213.4		0.5415	19708		0.5415	32885.9
0.6497	25872.6		0.64974	34729.1		0.6497	15060.3		0.6497	7774.09		0.64974	12030.1		0.64974	10094.2		0.6497	15996.3		0.6497	14118.9		0.6497	20240.3		0.6497	10024.9		0.6497	17130.8		0.6497	18163.6		0.6497	20751.3		0.6497	35991.8
0.758	30966.2		0.75803	41221		0.758	17751.2		0.758	8058.75		0.75803	14119.6		0.75803	11730.4		0.758	17899.6		0.758	15472.6		0.758	21692.4		0.758	10326		0.758	18216.8		0.758	19488.4		0.758	22187.4		0.758	39842.6
0.8663	37966.4		0.86632	46134		0.8663	21072.8		0.8663	8582.17		0.86632	17391.8		0.86632	14279.4		0.8663	20337		0.8663	17167.5		0.8663	23266.5		0.8663	10864.8		0.8663	19395.9		0.8663	20832.9		0.8663	23238.3		0.8663	45397
0.9746	44352.2		0.97461	48881.3		0.9746	26032.7		0.9746	9023.02		0.97461	22153.3		0.97461	17859		0.9746	23487.6		0.9746	20603.8		0.9746	24543.3		0.9746	11317.9		0.9746	20843.7		0.9746	22053.2		0.9746	24867.3		0.9746	52637.6
1.0829	48561.2		1.0829	49308		1.0829	30175.3		1.0829	9761.77		1.0829	27230		1.0829	21879.1		1.0829	29050.9		1.0829	23833.5		1.0829	26115.8		1.0829	11907.3		1.0829	22291.2		1.0829	24522.1		1.0829	26998.8		1.0829	60571.1
1.1912	50551.3		1.19119	49481.8		1.1912	33375.3		1.1912	10721		1.19119	31347.4		1.19119	26226.9		1.1912	33998		1.1912	29996.8		1.1912	28188.7		1.1912	12736.8		1.1912	24216.9		1.1912	25945.4		1.1912	29301.5		1.1912	65535
1.2995	51530.5		1.29948	50174.5		1.2995	34471.4		1.2995	11853.8		1.29948	34196.9		1.29948	30178.4		1.2995	39051.8		1.2995	37282		1.2995	30435.7		1.2995	13517.1		1.2995	26587.2		1.2995	28006.6		1.2995	31863.2		1.2995	65535
1.4078	52094.9		1.40777	50276.9		1.4078	34988.9		1.4078	13067.5		1.40777	36188.7		1.40777	32590.7		1.4078	42120.7		1.4078	42723.8		1.4078	33547.9		1.4078	14461.5		1.4078	29057.5		1.4078	30291.2		1.4078	35061.5		1.4078	65535
1.5161	52075.5		1.51606	50917.4		1.5161	34890.1		1.5161	14761.7		1.51606	38042.6		1.51606	34401.7		1.5161	44740.1		1.5161	45029.3		1.5161	37093.6		1.5161	15582.8		1.5161	31664.2		1.5161	33094.1		1.5161	38832.5		1.5161	65535
1.6243	52233.1		1.62435	51392		1.6243	34693.8		1.6243	16828.7		1.62435	38882.1		1.62435	35345.1		1.6243	46273.2		1.6243	46319.8		1.6243	42160.6		1.6243	17160.5		1.6243	34916		1.6243	36617.3		1.6243	43774.1		1.6243	65535
1.7326	52710		1.73264	51872.6		1.7326	35062.7		1.7326	20058.3		1.73264	39381.8		1.73264	36380.8		1.7326	47909.1		1.7326	46856.3		1.7326	48903.6		1.7326	18820.9		1.7326	39219.1		1.7326	40978.8		1.7326	50568.6		1.7326	65535
1.8409	52604.6		1.84093	51957.5		1.8409	35133.5		1.8409	24296.1		1.84093	39874.7		1.84093	36995.9		1.8409	49012.3		1.8409	47229		1.8409	57824.5		1.8409	20592.5		1.8409	45223.2		1.8409	47043.4		1.8409	59705.2		1.8409	65535
1.9492	52444.6		1.94922	52207.3		1.9492	35184.7		1.9492	29064.7		1.94922	40117.5		1.94922	37428.5		1.9492	49976.3		1.9492	47406.3		1.9492	65535		1.9492	23428.3		1.9492	53617.8		1.9492	55680.9		1.9492	65535		1.9492	65535
2.0575	52727.4		2.05751	52224.6		2.0575	35352.7		2.0575	34708.3		2.05751	40029.1		2.05751	37845.7		2.0575	50634.1		2.0575	47991.5		2.0575	65535		2.0575	26615.4		2.0575	62640.1		2.0575	64440.3		2.0575	65535		2.0575	65535
2.1658	53109.5		2.1658	52852		2.1658	36117.1		2.1658	38350.2		2.1658	40603		2.1658	37586.2		2.1658	50919.5		2.1658	48332.6		2.1658	65535		2.1658	30707.1		2.1658	65535		2.1658	65517		2.1658	65535		2.1658	65535
2.2741	53112.5		2.27409	52929		2.2741	36244.8		2.2741	40101.7		2.27409	40578.9		2.27409	37790.9		2.2741	51448.3		2.2741	48472.1		2.2741	65535		2.2741	35781.4		2.2741	65535		2.2741	65535		2.2741	65535		2.2741	65535
2.3824	53060.5		2.38238	53099		2.3824	36283.2		2.3824	41208.4		2.38238	40495.2		2.38238	38110.4		2.3824	52115.8		2.3824	48953.9		2.3824	65535		2.3824	42005.9		2.3824	65535		2.3824	65535		2.3824	65535		2.3824	65535
2.4907	53631.7		2.49067	53147.4		2.4907	36584		2.4907	41442		2.49067	40795.7		2.49067	38225.3		2.4907	52480.9		2.4907	49254.5		2.4907	65535		2.4907	47854.4		2.4907	65535		2.4907	65535		2.4907	65535		2.4907	65535
2.599	54190.2		2.59896	53096.9		2.599	36379.3		2.599	42037.3		2.59896	40820.8		2.59896	38553.9		2.599	52370.6		2.599	49258.5		2.599	65535		2.599	54088.4		2.599	65535		2.599	65535		2.599	65535		2.599	65535
2.7073	53609.1		2.70725	53320.6		2.7073	36594.6		2.7073	42069.4		2.70725	40723.4		2.70725	38651		2.7073	53192.1		2.7073	49954.8		2.7073	65535		2.7073	60530.9		2.7073	65535		2.7073	65535		2.7073	65535		2.7073	65535
2.8155	53546.4		2.81554	53154.3		2.8155	36889.2		2.8155	42139.8		2.81554	40569.8		2.81554	38277.6		2.8155	53078.5		2.8155	50045.2		2.8155	65535		2.8155	64638.8		2.8155	65535		2.8155	65535		2.8155	65535		2.8155	65535
2.9238	53885.3		2.92383	53999		2.9238	36916.4		2.9238	42425		2.92383	40835.8		2.92383	38710.2		2.9238	53050.4		2.9238	49605.4		2.9238	65535		2.9238	65526.8		2.9238	65535		2.9238	65535		2.9238	65535		2.9238	65535
3.0321	53674.5		3.03212	53323.1		3.0321	37301.4		3.0321	42538		3.03212	41401		3.03212	38851.7		3.0321	53606.6		3.0321	49696.5		3.0321	65535		3.0321	65535		3.0321	65535		3.0321	65535		3.0321	65535		3.0321	65535
3.1404	54137.4		3.14041	53671.1		3.1404	37330.6		3.1404	42741		3.14041	41707.7		3.14041	39106.7		3.1404	53347.4		3.1404	50176.6		3.1404	65535		3.1404	65535		3.1404	65535		3.1404	65535		3.1404	65535		3.1404	65535
3.2487	55232.4		3.2487	54380.8		3.2487	37189.4		3.2487	42684.5		3.2487	41349.3		3.2487	39146.8		3.2487	53713.5		3.2487	50696.3		3.2487	65535		3.2487	65535		3.2487	65535		3.2487	65535		3.2487	65535		3.2487	65535
3.357	54997.6		3.35699	54685.4		3.357	37254.8		3.357	43067.3		3.35699	41075.1		3.35699	39356.7		3.357	54163.8		3.357	50714.9		3.357	65535		3.357	65535		3.357	65535		3.357	65535		3.357	65535		3.357	65535
3.4653	54594.3		3.46528	54654.4		3.4653	37748.5		3.4653	43071.6		3.46528	42162.3		3.46528	39375		3.4653	54048.4		3.4653	51282.5		3.4653	65535		3.4653	65535		3.4653	65535		3.4653	65535		3.4653	65535		3.4653	65535
3.5736	54620.1		3.57357	54791		3.5736	37959.7		3.5736	43173.2		3.57357	41537.8		3.57357	39636.8		3.5736	54664.6		3.5736	51194.8		3.5736	65535		3.5736	65535		3.5736	65535		3.5736	65535		3.5736	65535		3.5736	65535
3.6819	55006.1		3.68186	54639		3.6819	38032.1		3.6819	43548.5		3.68186	41414.7		3.68186	40048		3.6819	54853.6		3.6819	51203.7		3.6819	65535		3.6819	65535		3.6819	65535		3.6819	65535		3.6819	65535		3.6819	65535
3.7901	54884.8		3.79015	54322.1		3.7901	38260.5		3.7901	43851		3.79015	41498.2		3.79015	40089.3		3.7901	55030.8		3.7901	51571.6		3.7901	65535		3.7901	65535		3.7901	65535		3.7901	65535		3.7901	65535		3.7901	65535
3.8984	55239.6		3.89844	54712.9		3.8984	38185.9		3.8984	44042		3.89844	41195.4		3.89844	40231		3.8984	54035.3		3.8984	51942.3		3.8984	65535		3.8984	65535		3.8984	65535		3.8984	65535		3.8984	65535		3.8984	65535
4.0067	55571.6		4.00673	54449.4		4.0067	38503.4		4.0067	44262.7		4.00673	41180.9		4.00673	39663.5		4.0067	54614.6		4.0067	52471.5		4.0067	65535		4.0067	65535		4.0067	65535		4.0067	65535		4.0067	65535		4.0067	65535
4.115	55667.9		4.11502	54647.1		4.115	38621.8		4.115	44365.7		4.11502	41300.2		4.11502	39459.3		4.115	55587		4.115	52407.1		4.115	65535		4.115	65535		4.115	65535		4.115	65535		4.115	65535		4.115	65535
4.2233	55989		4.22331	54735.7		4.2233	38288.1		4.2233	44698.9		4.22331	40660.6		4.22331	39761.3		4.2233	54978		4.2233	51844.8		4.2233	65535		4.2233	65535		4.2233	65535		4.2233	65535		4.2233	65535		4.2233	65535
4.3316	55638.5		4.3316	55163.2		4.3316	37762.9		4.3316	44595.1		4.3316	40660.7		4.3316	39787.9		4.3316	54978.8		4.3316	51540.8		4.3316	65535		4.3316	65535		4.3316	65535		4.3316	65535		4.3316	65535		4.3316	65535
4.4399	55477.2		4.43989	54958.8		4.4399	38146.9		4.4399	44827.9		4.43989	40473.7		4.43989	39691.2		4.4399	55657.8		4.4399	52343.7		4.4399	65535		4.4399	65535		4.4399	65535		4.4399	65535		4.4399	65535		4.4399	65535
4.5482	55835.1		4.54818	54729.1		4.5482	38456.9		4.5482	44710.8		4.54818	40062.8		4.54818	39646.3		4.5482	55432.3		4.5482	52351.8		4.5482	65535		4.5482	65535		4.5482	65535		4.5482	65535		4.5482	65535		4.5482	65535
4.6565	56366.1		4.65647	55091.8		4.6565	38627.5		4.6565	44788.1		4.65647	39750.7		4.65647	40003.1		4.6565	55442.6		4.6565	51520		4.6565	65535		4.6565	65535		4.6565	65535		4.6565	65535		4.6565	65535		4.6565	65535
4.7648	56504.5		4.76476	54983		4.7648	38491.5		4.7648	45002.2		4.76476	39053.4		4.76476	40058.4		4.7648	55683.8		4.7648	52029.6		4.7648	65535		4.7648	65535		4.7648	65535		4.7648	65535		4.7648	65535		4.7648	65535
4.8731	56656.2		4.87305	54690		4.8731	38727.4		4.8731	45143		4.87305	37606.2		4.87305	40362.1		4.8731	55241.6		4.8731	51734		4.8731	65535		4.8731	65535		4.8731	65535		4.8731	65535		4.8731	65535		4.8731	65535
4.9813	56673		4.98134	55364.3		4.9813	38421.7		4.9813	45311.2		4.98134	35034.1		4.98134	39865.7		4.9813	55744.1		4.9813	52351.7		4.9813	65535		4.9813	65535		4.9813	65535		4.9813	65535		4.9813	65535		4.9813	65535
5.0896	56199.2		5.08963	55302.3		5.0896	38717.8		5.0896	45064.7		5.08963	30583.9		5.08963	39890.3		5.0896	55587		5.0896	52434.6		5.0896	65535		5.0896	65535		5.0896	65535		5.0896	65535		5.0896	65535		5.0896	65535
5.1979	56340.7		5.19792	54971.2		5.1979	38346.5		5.1979	45099.2		5.19792	24783.5		5.19792	39641.3		5.1979	56262.1		5.1979	52314.1		5.1979	65535		5.1979	65535		5.1979	65535		5.1979	65535		5.1979	65535		5.1979	65535
5.3062	56159.4		5.30621	54931.5		5.3062	38571.4		5.3062	45167.5		5.30621	19972.3		5.30621	39546.8		5.3062	55530.8		5.3062	52533.9		5.3062	65535		5.3062	65535		5.3062	65535		5.3062	65535		5.3062	65535		5.3062	65535
5.4145	56567.6		5.4145	55310.9		5.4145	38400.5		5.4145	44908.4		5.4145	16049		5.4145	39881.6		5.4145	56161.8		5.4145	52626.4		5.4145	65535		5.4145	65535		5.4145	65535		5.4145	65535		5.4145	65535		5.4145	65535
5.5228	56683.9		5.52279	55410		5.5228	39073.3		5.5228	45583.8		5.52279	13366		5.52279	39683.9		5.5228	56053.3		5.5228	52335.3		5.5228	65535		5.5228	65535		5.5228	65535		5.5228	65535		5.5228	65535		5.5228	65535
5.6311	56420.3		5.63108	55104.3		5.6311	38853.2		5.6311	45720.2					5.63108	39996.5		5.6311	56083.3		5.6311	51961.9		5.6311	65535		5.6311	65535		5.6311	65535		5.6311	65535		5.6311	65535		5.6311	65535
5.7394	56164.4		5.73937	54789.7		5.7394	38966.3		5.7394	45782.8					5.73937	39710.5		5.7394	55546.4		5.7394	52911.6		5.7394	65535		5.7394	65535		5.7394	65535		5.7394	65535		5.7394	65535		5.7394	65535
5.8477	56199.3		5.84766	54714.4		5.8477	38763.6		5.8477	46089.5					5.84766	39359.7		5.8477	55578.8		5.8477	52748.9		5.8477	65535		5.8477	65535		5.8477	65535		5.8477	65535		5.8477	65535		5.8477	65535
5.9559	56317.4		5.95595	54650.8		5.9559	38667.6		5.9559	45370.4					5.95595	39219.8		5.9559	55654		5.9559	51850.9		5.9559	65535		5.9559	65535		5.9559	65535		5.9559	65535		5.9559	65535		5.9559	65535
6.0642	56479.2		6.06424	54906.3		6.0642	38773.2		6.0642	45782.5					6.06424	39034.2		6.0642	56036.7		6.0642	51733.9		6.0642	65535		6.0642	65535		6.0642	65535		6.0642	65535		6.0642	65535		6.0642	65535
6.1725	56580.1		6.17253	54749.8		6.1725	38751.2		6.1725	45372.4					6.17253	38813.9		6.1725	55362.2		6.1725	51549.7		6.1725	65535		6.1725	65535		6.1725	65535		6.1725	65535		6.1725	65535		6.1725	65535
6.2808	56631.8		6.28082	54499.6		6.2808	38657.1		6.2808	45848.9					6.28082	38873.3		6.2808	55908.9		6.2808	51740.9		6.2808	65535		6.2808	65535		6.2808	65535		6.2808	65535		6.2808	65535		6.2808	65535
6.3891	56255.3		6.38911	54377.5		6.3891	38736.6		6.3891	45810.1					6.38911	38957.3		6.3891	55800.9		6.3891	51342.6		6.3891	65535		6.3891	65535		6.3891	65535		6.3891	65535		6.3891	65535		6.3891	65535
6.4974	56749.4		6.4974	54400.5		6.4974	38639.7		6.4974	45858.7					6.4974	38974.6		6.4974	55653.2		6.4974	50974.6		6.4974	65535		6.4974	65535		6.4974	65535		6.4974	65535		6.4974	65535		6.4974	65535
6.6057	56843.7		6.60569	53684.4		6.6057	38484.8		6.6057	46080.1					6.60569	38637.4		6.6057	55043.7		6.6057	50918.1		6.6057	65535		6.6057	65535		6.6057	65535		6.6057	65535		6.6057	65535		6.6057	65535
6.714	57197		6.71398	53821.5		6.714	39047.5		6.714	45607.3					6.71398	37937.4		6.714	55464.9		6.714	50719.2		6.714	65535		6.714	65535		6.714	65535		6.714	65535		6.714	65535		6.714	65535
6.8223	56907.9		6.82227	53914.7		6.8223	38869.4		6.8223	45832.2					6.82227	37796.9		6.8223	55401.3		6.8223	50512.8		6.8223	65535		6.8223	65535		6.8223	65535		6.8223	65535		6.8223	65535		6.8223	65535
6.9306	56488.7		6.93056	53899.6		6.9306	38923.7		6.9306	45895.7					6.93056	37712.3		6.9306	54894		6.9306	50731.3		6.9306	65535		6.9306	65535		6.9306	65535		6.9306	65535		6.9306	65535		6.9306	65535
7.0388	56306.8		7.03885	53511.3		7.0388	38902.4		7.0388	45852.4					7.03885	37220.5		7.0388	55488.9		7.0388	50304.9		7.0388	65535		7.0388	65535		7.0388	65535		7.0388	65535		7.0388	65535		7.0388	65535
7.1471	56282.9		7.14714	53294.5		7.1471	38836.2		7.1471	46125.4					7.14714	36226.6		7.1471	54834.8		7.1471	49842.8		7.1471	65535		7.1471	65535		7.1471	65535		7.1471	65535		7.1471	65535		7.1471	65535
7.2554	56556.6		7.25543	53282.6		7.2554	39129.5		7.2554	45988.3					7.25543	34254.7		7.2554	55572.8		7.2554	49936.5		7.2554	65535		7.2554	65535		7.2554	65535		7.2554	65535		7.2554	65535		7.2554	65535
7.3637	56785.5		7.36372	53000.1		7.3637	39369.9		7.3637	45918.2					7.36372	31588.4		7.3637	55187.3		7.3637	49747.1		7.3637	65535		7.3637	65535		7.3637	65535		7.3637	65535		7.3637	65535		7.3637	65535
7.472	56325.1		7.47201	52609.6		7.472	39109.7		7.472	46330.5					7.47201	28266.5		7.472	54449.5		7.472	49387.1		7.472	65535		7.472	65535		7.472	65535		7.472	65535		7.472	65535		7.472	65535
7.5803	56861.2		7.5803	52494		7.5803	38564.1		7.5803	46177.7					7.5803	24134.3		7.5803	54288.5		7.5803	48765.2		7.5803	65535		7.5803	65535		7.5803	65535		7.5803	65535		7.5803	65535		7.5803	65535
7.6886	57001.7		7.68859	51688.8		7.6886	38646.2		7.6886	46298.4					7.68859	19933.1		7.6886	54752.9		7.6886	48328.7		7.6886	65535		7.6886	65535		7.6886	65535		7.6886	65535		7.6886	65535		7.6886	65535
7.7969	57099.4		7.79688	51386.2		7.7969	38788.8		7.7969	46165.8					7.79688	16495.2		7.7969	54519.4		7.7969	48159.8		7.7969	65535		7.7969	65535		7.7969	65535		7.7969	65535		7.7969	65535		7.7969	65535
7.9052	57026.1		7.90517	50880.4		7.9052	38733.1		7.9052	46036.6					7.90517	14508		7.9052	54530.4		7.9052	48092.9		7.9052	65535		7.9052	65535		7.9052	65535		7.9052	65535		7.9052	65535		7.9052	65535
8.0135	57269.1		8.01346	50353.3		8.0135	38851.9		8.0135	45874.6					8.01346	12718.6		8.0135	53460.7		8.0135	47267.5		8.0135	65535		8.0135	65535		8.0135	65535		8.0135	65535		8.0135	65535		8.0135	65535
8.1217	57749.1		8.12175	49700.5		8.1217	38675.3		8.1217	45847.5					8.12175	11735.4		8.1217	54056.6		8.1217	46773		8.1217	65535		8.1217	65535		8.1217	65535		8.1217	65535		8.1217	65535		8.1217	65535
8.23	56947.2		8.23004	49232.3		8.23	38297.7		8.23	45960.3					8.23004	10711.7		8.23	53496.1		8.23	46078.5		8.23	65535		8.23	65535		8.23	65535		8.23	65535		8.23	65535		8.23	65535
8.3383	56938.9		8.33833	48923.8		8.3383	38253.8		8.3383	46479.4					8.33833	9916.26		8.3383	53872.7		8.3383	45018.9		8.3383	65535		8.3383	65535		8.3383	65535		8.3383	65535		8.3383	65535		8.3383	65535
8.4466	56547.9		8.44662	47839.3		8.4466	38508.8		8.4466	46681.6					8.44662	9211.75		8.4466	53462.9		8.4466	44079.6		8.4466	65535		8.4466	65535		8.4466	65535		8.4466	65535		8.4466	65535		8.4466	65535
8.5549	56670		8.55491	46504.1		8.5549	38539.8		8.5549	46568					8.55491	8678		8.5549	52944.8		8.5549	42114.8		8.5549	65535		8.5549	65535		8.5549	65535		8.5549	65535		8.5549	65535		8.5549	65535
8.6632	56554.9		8.6632	44825.7		8.6632	38518.2		8.6632	46790.8								8.6632	52471.1		8.6632	38606.8		8.6632	65535		8.6632	65535		8.6632	65535		8.6632	65535		8.6632	65535		8.6632	65535
8.7715	56018.2		8.77149	40902.6		8.7715	38633.2		8.7715	47061.5								8.7715	52523.1		8.7715	32265.4		8.7715	65535		8.7715	65535		8.7715	65535		8.7715	65535		8.7715	65535		8.7715	65535
8.8798	55536.7		8.87978	35294.5		8.8798	38453.8		8.8798	46578.6								8.8798	51996.6		8.8798	25559.5		8.8798	65535		8.8798	65535		8.8798	65535		8.8798	65535		8.8798	65535		8.8798	65535
8.9881	56133.9		8.98807	29428.5		8.9881	37943.8		8.9881	46184.9								8.9881	50887.7		8.9881	21170.9		8.9881	65535		8.9881	65535		8.9881	65535		8.9881	65535		8.9881	65535		8.9881	65535
9.0964	56225.9		9.09636	24802.7		9.0964	37704.7		9.0964	46187.2								9.0964	50848.4		9.0964	18140.1		9.0964	65535		9.0964	65535		9.0964	65535		9.0964	65535		9.0964	65535		9.0964	65535
9.2046	55692.1		9.20465	21359.5		9.2046	37913.7		9.2046	46438.2								9.2046	49797.1		9.2046	15789.5		9.2046	65535		9.2046	65535		9.2046	65535		9.2046	65535		9.2046	65535		9.2046	65535
9.3129	55545.8		9.31294	18742		9.3129	37721.7		9.3129	46225								9.3129	49436		9.3129	14146.5		9.3129	65535		9.3129	65535		9.3129	65535		9.3129	65535		9.3129	65535		9.3129	65535
9.4212	55356.8		9.42123	16922.4		9.4212	37880.1		9.4212	46445.9								9.4212	48838.1		9.4212	12977.3		9.4212	65535		9.4212	65535		9.4212	65535		9.4212	65535		9.4212	65535		9.4212	65535
9.5295	54909		9.52952	15664		9.5295	37700.1		9.5295	46098.4								9.5295	48013.6		9.5295	11780.7		9.5295	65535		9.5295	65535		9.5295	65535		9.5295	65535		9.5295	65535		9.5295	65535
9.6378	55274.4					9.6378	37452.3		9.6378	46474.7								9.6378	46292.5		9.6378	11240		9.6378	65535		9.6378	65535		9.6378	65535		9.6378	65535		9.6378	65535		9.6378	65535
9.7461	54424.2					9.7461	37390.4		9.7461	46687								9.7461	45362		9.7461	10629.1		9.7461	65535		9.7461	65535		9.7461	65535		9.7461	65535		9.7461	65535		9.7461	65535
9.8544	54521.5		ratio	0.246131		9.8544	37486.9		9.8544	46384.9								9.8544	43371.2		9.8544	10056.6		9.8544	65535		9.8544	65535		9.8544	65535		9.8544	65535		9.8544	65535		9.8544	65535
9.9627	54917.7					9.9627	37446.8		9.9627	46585.1								9.9627	41383		9.9627	9493.34		9.9627	65535		9.9627	65535		9.9627	65535		9.9627	65535		9.9627	65535		9.9627	65535
10.071	54627.9					10.071	37151.3		10.071	46667.7								10.071	37450.6		10.071	8899.34		10.071	65535		10.071	65535		10.071	65535		10.071	65535		10.071	65535		10.071	65535
10.1793	53919.5					10.1793	36363.7		10.1793	46518.2								10.1793	33215.5		10.1793	8461.22		10.1793	65535		10.1793	65535		10.1793	65535		10.1793	65535		10.1793	65535		10.1793	65535
10.2875	53636.7					10.2875	36896.7		10.2875	46606.1								10.2875	29499.5		10.2875	8133.95		10.2875	65535		10.2875	65535		10.2875	65535		10.2875	65535		10.2875	65535		10.2875	65535
10.3958	52794.7					10.3958	36529.9		10.3958	46788.1								10.3958	25338.9		10.3958	7948.03		10.3958	65535		10.3958	65535		10.3958	65535		10.3958	65535		10.3958	65535		10.3958	65535
10.5041	52539					10.5041	36644.6		10.5041	46380.9								10.5041	22034.8		10.5041	7603		10.5041	65535		10.5041	65535		10.5041	65535		10.5041	65535		10.5041	65535		10.5041	65535
10.6124	52675.6					10.6124	35845.4		10.6124	46185.2								10.6124	19306.4					10.6124	65535		10.6124	65535		10.6124	65535		10.6124	65535		10.6124	65535		10.6124	65535
10.7207	51930.9					10.7207	35849.1		10.7207	46602.4								10.7207	17783.3					10.7207	65535		10.7207	65535		10.7207	65535		10.7207	65535		10.7207	65535		10.7207	65535
10.829	50709.7					10.829	35747.6		10.829	46559.9								10.829	15963.9					10.829	65535		10.829	65535		10.829	65535		10.829	65535		10.829	65535		10.829	65535
10.9373	50924.6					10.9373	34978.7		10.9373	46455.9								10.9373	14664.3					10.9373	65535		10.9373	65535		10.9373	65535		10.9373	65535		10.9373	65535		10.9373	65535
11.0456	50275.3					11.0456	34714.2		11.0456	46182.1								11.0456	13344					11.0456	65535		11.0456	65535		11.0456	65535		11.0456	65535		11.0456	65535		11.0456	65535
11.1539	49147.5					11.1539	34418.9		11.1539	46459.5								11.1539	12416.6					11.1539	65535		11.1539	65535		11.1539	65535		11.1539	65535		11.1539	65535		11.1539	65535
11.2622	47400.9					11.2622	33231.9		11.2622	46588.4								11.2622	11637.7					11.2622	65535		11.2622	65535		11.2622	65535		11.2622	62338.7		11.2622	65535		11.2622	65535
11.3705	44570.4					11.3705	30324.9		11.3705	46359.7								11.3705	11169					11.3705	65535		11.3705	65535		11.3705	65535		11.3705	53626.8		11.3705	65535		11.3705	65535
11.4787	38872.7					11.4787	26087.7		11.4787	46404.2								11.4787	10515.6					11.4787	65535		11.4787	65535		11.4787	65535		11.4787	45116.6		11.4787	65535		11.4787	65535
11.587	32844.1					11.587	21933.8		11.587	46719.9								11.587	10548.2					11.587	65535		11.587	65535		11.587	65535		11.587	39613.5		11.587	65525.4		11.587	65532.7
11.6953	27585.1					11.6953	18719.1		11.6953	46525.3								11.6953	9962.65					11.6953	65535		11.6953	65535		11.6953	65535		11.6953	35565.2		11.6953	64847.7		11.6953	64277.9
11.8036	23821.8					11.8036	16215.1		11.8036	46425.5								11.8036	9692.56					11.8036	65535		11.8036	65535		11.8036	65397.8		11.8036	32267.5		11.8036	56191.6		11.8036	56639
11.9119	20753					11.9119	14128		11.9119	46404.7								11.9119	9365					11.9119	65535		11.9119	65535		11.9119	59530.3		11.9119	29399.6		11.9119	47463		11.9119	46383.2
12.0202	18531.3					12.0202	12619.7		12.0202	46179.4														12.0202	65535		12.0202	65535		12.0202	51447.4		12.0202	26971.5		12.0202	40607.3		12.0202	39051.8
12.1285	16702					12.1285	11313.4		12.1285	46409														12.1285	65535		12.1285	65535		12.1285	45541.3		12.1285	25029.4		12.1285	36311.8		12.1285	33367.3
						12.2368	10348.4		12.2368	47000.7														12.2368	65535		12.2368	65535		12.2368	41155.3		12.2368	23515.9		12.2368	32930.8		12.2368	29241.5
						12.3451	9558.81		12.3451	46375.8														12.3451	65535		12.3451	65535		12.3451	37609		12.3451	22131.4		12.3451	29849.7		12.3451	26196.8
Ratio	0.220908					12.4534	9027.89		12.4534	46083.7														12.4534	65535		12.4534	65535		12.4534	34363.9		12.4534	20578.9		12.4534	27482.4		12.4534	24328.2
						12.5616	8618.29		12.5616	46015.5														12.5616	65535		12.5616	65535		12.5616	31395.8		12.5616	19345.4		12.5616	25511		12.5616	22344.8
						12.6699	8227		12.6699	46154.7														12.6699	65535		12.6699	65535		12.6699	28750.9		12.6699	18323.5		12.6699	23695.2		12.6699	20500.7
									12.7782	46388.5														12.7782	65535		12.7782	65535		12.7782	26539.8		12.7782	17352		12.7782	22212		12.7782	18829.1
									12.8865	46530.6														12.8865	65535		12.8865	65535		12.8865	24980.4								12.8865	17511.8
									12.9948	46258.3														12.9948	65535		12.9948	65535		12.9948	23046.4								12.9948	16256.3
									13.1031	45855.8														13.1031	65535		13.1031	65535		13.1031	21699.1								13.1031	15369.9
									13.2114	45951.7														13.2114	65535		13.2114	65535		13.2114	20722.8								13.2114	14458
									13.3197	46109.6														13.3197	65535		13.3197	65535		13.3197	19534.1
									13.428	45742														13.428	65535		13.428	65535		13.428	18181.5
									13.5363	45468.4														13.5363	65535		13.5363	65535		13.5363	17340
									13.6445	45915.7														13.6445	65535		13.6445	65535
									13.7528	46256.3														13.7528	65535		13.7528	65535
									13.8611	46072.3														13.8611	65535		13.8611	65535
									13.9694	45824.5														13.9694	65535		13.9694	65535
									14.0777	45975.2														14.0777	65535		14.0777	65535
									14.186	45662.3														14.186	65535		14.186	64819.6
									14.2943	45567.7														14.2943	65535		14.2943	61286.2
									14.4026	45659.7														14.4026	65535		14.4026	54799.9
									14.5109	45677.7														14.5109	65535		14.5109	48263
									14.6192	45587.2														14.6192	65535		14.6192	41958.5
									14.7274	44989.6														14.7274	65535		14.7274	36281.3
									14.8357	45437.6														14.8357	65535		14.8357	31549.1
									14.944	45042.1														14.944	65535		14.944	28204.1
									15.0523	44895.5														15.0523	65535		15.0523	25319
									15.1606	45188.3														15.1606	65535		15.1606	23034.7
									15.2689	44762.4														15.2689	65535		15.2689	21105.5
									15.3772	44281.9														15.3772	65535		15.3772	19420.5
									15.4855	44041.4														15.4855	65535		15.4855	18443.2
									15.5938	44292.2														15.5938	65535		15.5938	17048.5
									15.7021	44106.4														15.7021	65535		15.7021	16078
									15.8103	43773.1														15.8103	65535		15.8103	15354.1
									15.9186	43308.1														15.9186	65535		15.9186	14227.8
									16.0269	43129.5														16.0269	65535		16.0269	13607
									16.1352	43242.1														16.1352	65535
									16.2435	42732.9														16.2435	65535
									16.3518	42516.1														16.3518	65535
									16.4601	42150.9														16.4601	65535
									16.5684	41867														16.5684	65535
									16.6767	41124.4														16.6767	65535
									16.785	41081.7														16.785	65535
									16.8932	40095.1														16.8932	65535
									17.0015	39219.4														17.0015	65535
									17.1098	37658.1														17.1098	65535
									17.2181	34051.6														17.2181	65535
									17.3264	29353.9														17.3264	65535
									17.4347	24524.4														17.4347	65535
									17.543	21326.9														17.543	65535
									17.6513	18878.9														17.6513	65535
									17.7596	16953.2														17.7596	65535
									17.8678	15338.1														17.8678	65535
									17.9761	13962.2														17.9761	65535
									18.0844	12853.7														18.0844	65535
									18.1927	11797.1														18.1927	65535
									18.301	11534.2														18.301	65535
									18.4093	10874.6														18.4093	65535
									18.5176	10360.2														18.5176	65535
									18.6259	9779														18.6259	65535
																								18.7342	61828.8
																								18.8425	54801.2
																								18.9508	49001.5
																								19.059	45066.4
																								19.1673	41858.2
																								19.2756	39001
																								19.3839	36422.3
																								19.4922	34046.2
																								19.6005	31536.7
																								19.7088	30222.2
																								19.8171	28265.6
																								19.9254	26582
																								20.0336	25007.9
																								20.1419	24529.3
																								20.2502	23068.2
																								20.3585	22182.5
																								20.4668	20695.2
																								20.5751	20382.7
																								20.6834	19740.9
																								20.7917	18799.2
																								20.9	18202.4
																								21.0083	17696.8
																								21.1166	17150.5
																								21.2248	16824.4
																								21.3331	16576.1
																								21.4414	16113.5
																								21.5497	15718.5
																								21.658	15300.8
																								21.7663	15006.5
																								21.8746	14584.5
																								21.9829	14411.4
																								22.0912	14181

## Sheet: Droplets_corrected
		1		2		3		4		5		6		7		8		9		10		11		12		13		14		15
Droplet	start	0	7744.56	0	8077	0	8878	0.0000	5344.67	0	28310.8	0	13009.5	0	12135	0	3537.25	0	4285.9	0	4460.39	0	6712	0	4565.69	0	43500	0	37827.4	0	26415.3
	middle	2.92383	9877.56	2.1658	9186.73	3.89844	9099.83	5.4145	7307.38	2.38238	36217.9	1.73264	14835.6	1.29948	15709.2	4.87305	2792.87	2.05751	4387.69	3.68186	4126.84	4.11502	6871.5	8.1217	3465.18	3.57357	51366.5	4.22331	42092.8	2.49067	30385.5
	end	5.95595	4641.33	4.22331	7188	7.68859	5282	10.829	4697.67	4.54818	39225.4	3.46528	11154.2	2.70725	11045	9.63781	2337	4.00673	3546	7.25543	3742	8.23004	3686	16.3518	4735	7.36372	36276.1	6.38911	36597	4.98134	27148
			1.27542	#DIV/0!	1.13739	#DIV/0!	1.02499	#VALUE!	1.36723	#DIV/0!	1.27929	#DIV/0!	1.14036	#DIV/0!	1.29452	#DIV/0!	0.789559	#DIV/0!	1.02375	#DIV/0!	0.925219	#DIV/0!	1.02376	#DIV/0!	0.75896	#DIV/0!	1.18084	#DIV/0!	1.11276	#DIV/0!	1.1503
		Distance- from one edge of the droplet to another side
		Ratio-Middle to start- Incorporation index
