# Supplementary material for: Multiple polarity kinases inhibit phase separation of F-BAR protein Cdc15 and antagonize cytokinetic ring assembly in fission yeast
Source: eLife journal article supplement (doi:10.7554/elife.83062), 2023-01-16
Supplement: fig7-figsupp1-data1 [file elife-83062-fig7-figsupp1-data1-v1.zip]

# Figure 7-figure supplement 1A

Coomassie stain

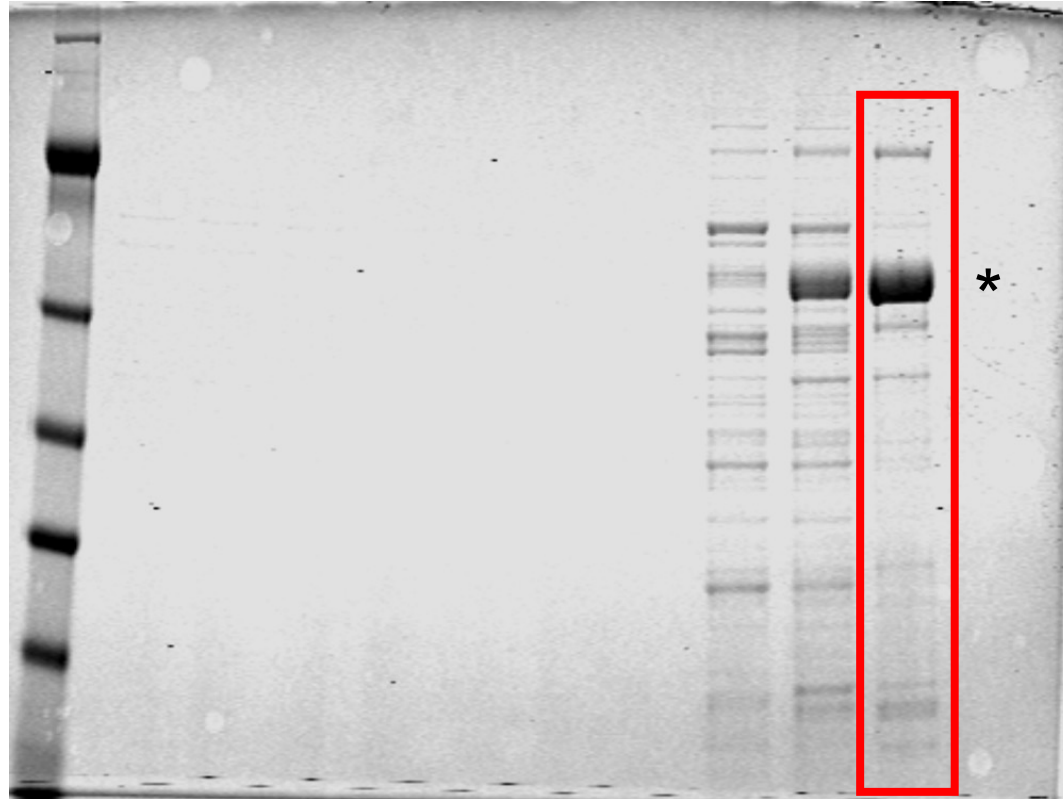

=His-Cdc15-IDR

## Figure 7-figure supplement 1B

Anti Cdc15 (Rabbit)

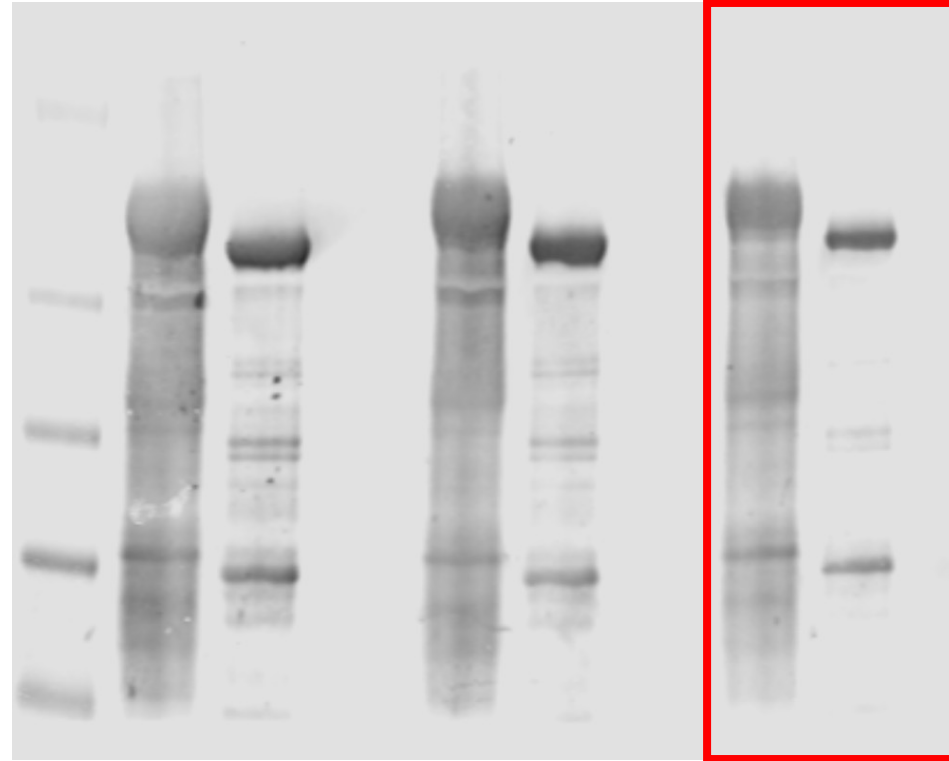

=His-Cdc15-IDR  
(- and + λ)
