# Supplementary material for: Multiple polarity kinases inhibit phase separation of F-BAR protein Cdc15 and antagonize cytokinetic ring assembly in fission yeast
Source: eLife journal article supplement (doi:10.7554/elife.83062), 2023-01-16
Supplement: fig8-figsupp1-data1 [file elife-83062-fig8-figsupp1-data1-v1.zip]

# Figure 8-figure supplement 1A

\*

Coomassie stain

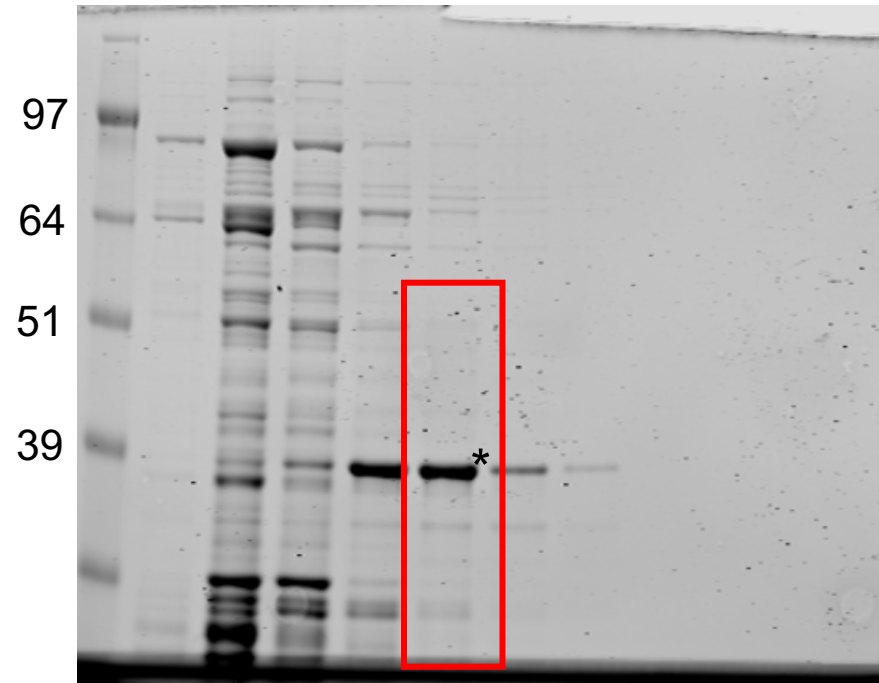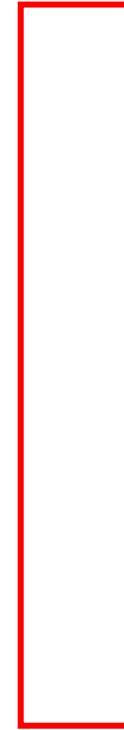

=Fic1-His<sub>6</sub>

# Figure 8-figure supplement 1B

\*

Coomassie stain

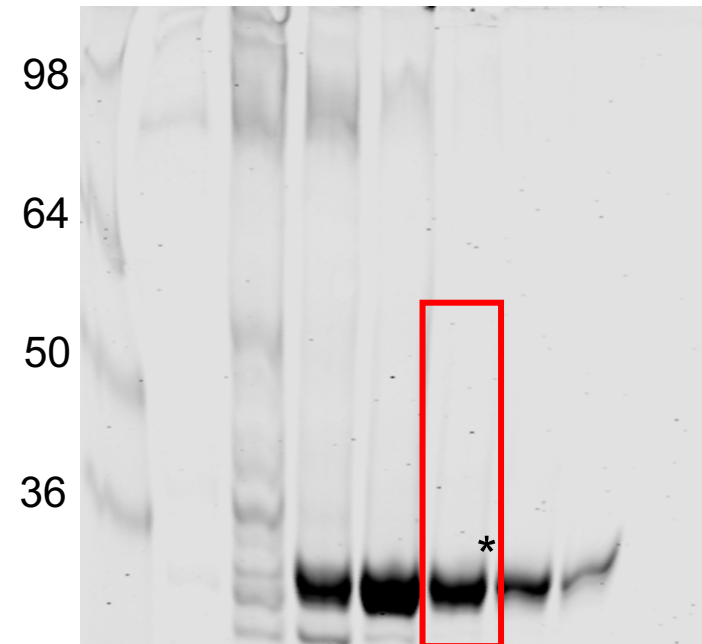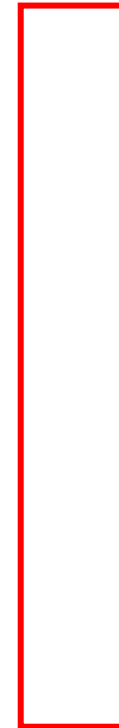

=His-mCherry

# Figure 8-figure supplement 1C

\*

## Coomassie stain

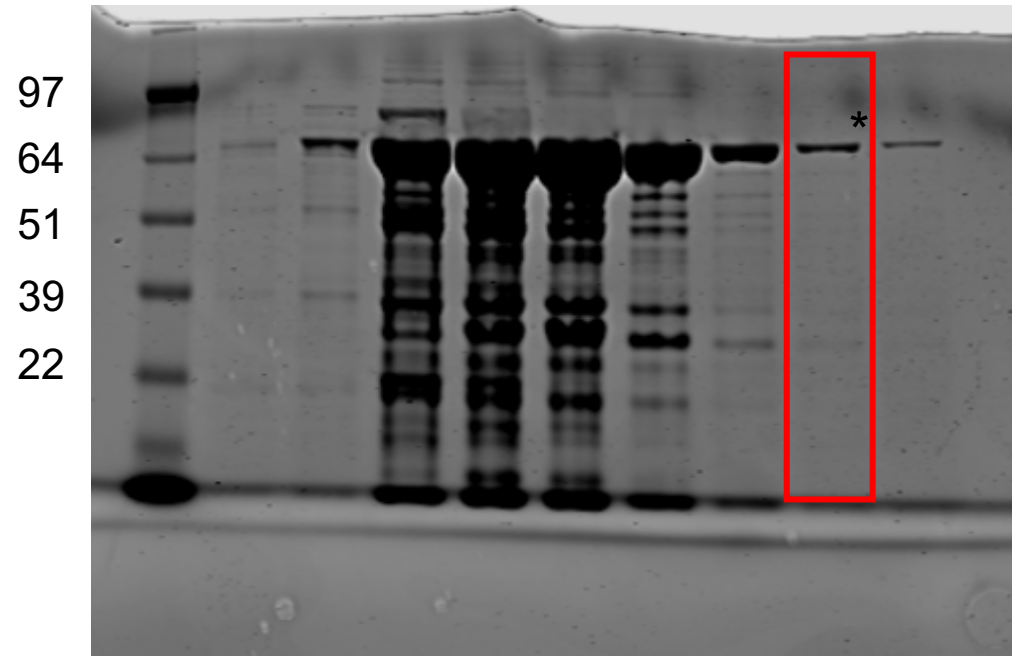

=His-Cdc15-IDR-SH3  
(W903S)
