# Supplementary material for: La pintura de Europa Oriental (1917-1989)
Source: eLife journal article supplement (doi:10.7554/elife.83062), 1990-01-01
Supplement: fig10-data1 [file Condensate number and size.xlsx]

## Sheet: mNG-Cdc15-31A
	Number	Area	Int Den	Raw Int Den			# Condensates per cell		Area (micron ^2)
	1	0.961	244.987	47175			10		0.961
	2	0.031	7.946	1530			17		0.031
	3	0.01	2.649	510			10		0.01
	4	0.14	35.755	6885			10		0.14
	5	0.145	37.079	7140			10		0.145
	6	0.026	6.621	1275			9		0.026
	7	0.036	9.27	1785			5		0.036
	8	0.01	2.649	510			15		0.01
	9	0.405	101.324	22255			12		0.405
	10	0.383	101.188	24080			22		0.383
									0.073
	1	0.073	18.54	3570					0.036
	2	0.036	9.27	1785					0.068
	3	0.068	17.215	3315					0.286
	4	0.286	71.51	13770					0.062
	5	0.062	15.891	3060					0.093
	6	0.093	23.837	4590					0.28
	7	0.28	71.51	13770					0.042
	8	0.042	10.594	2040					0.218
	9	0.218	55.619	10710					0.021
	10	0.021	5.297	1020					0.036
	11	0.036	9.27	1785					0.14
	12	0.14	35.755	6885					0.016
	13	0.016	3.973	765					0.151
	14	0.151	38.403	7395					0.016
	15	0.016	3.973	765					0.016
	16	0.016	3.973	765					0.005
	17	0.005	1.324	255					0.021
									0.026
	1	0.021	5.297	1020					0.431
	2	0.026	6.621	1275					0.286
	3	0.431	109.913	21165					0.145
	4	0.286	72.834	14025					0.452
	5	0.145	37.079	7140					0.13
	6	0.452	115.21	22185					0.436
	7	0.13	33.106	6375					0.068
	8	0.436	109.27	21785					0.026
	9	0.068	17.215	3315					0.005
	10	0.026	6.621	1275					0.182
									0.01
	1	0.005	1.324	255					0.068
	2	0.182	46.349	8925					0.026
	3	0.01	2.649	510					0.867
	4	0.068	17.215	3315					0.244
	5	0.026	6.621	1275					0.01
	6	0.867	221.15	42585					0.016
	7	0.244	62.24	11985					0.026
	8	0.01	2.649	510					0.047
	9	0.016	3.973	765					0.099
	10	0.026	6.621	1275					0.4
									0.203
	1	0.047	11.918	2295					0.01
	2	0.099	25.161	4845					0.016
	3	0.4	101.967	19635					0.042
	4	0.203	51.646	9945					0.052
	5	0.01	2.649	510					0.01
	6	0.016	3.973	765					0.068
	7	0.042	10.594	2040					0.519
	8	0.052	13.243	2550					0.893
	9	0.01	2.649	510					0.14
	10	0.068	17.215	3315					0.099
									0.068
	1	0.519	132.425	25500					0.005
	2	0.893	226.447	43605					0.005
	3	0.14	35.755	6885					0.01
	4	0.099	25.161	4845					0.016
	5	0.068	17.215	3315					1.376
	6	0.005	1.324	255					0.119
	7	0.005	1.324	255					0.088
	8	0.01	2.649	510					0.005
	9	0.016	3.973	765					0.036
									0.223
	1	1.376	350.927	67575					0.005
	2	0.119	30.458	5865					0.156
	3	0.088	22.512	4335					0.332
	4	0.005	1.324	255					0.036
	5	0.036	9.27	1785					0.109
									0.036
	1	0.223	56.943	10965					0.005
	2	0.005	1.324	255					0.016
	3	0.156	39.728	7650					0.109
	4	0.332	84.752	16320					0.026
	5	0.036	9.27	1785					0.021
	6	0.109	27.809	5355					0.068
	7	0.036	9.27	1785					0.042
	8	0.005	1.324	255					0.036
	9	0.016	3.973	765					0.005
	10	0.109	27.809	5355					0.036
	11	0.026	6.621	1275					0.068
	12	0.021	5.297	1020					0.192
	13	0.068	17.215	3315					0.519
	14	0.042	10.594	2040					0.042
	15	0.036	9.27	1785					0.005
									0.28
	1	0.005	1.324	255					0.047
	2	0.036	9.27	1785					0.005
	3	0.068	17.215	3315					0.016
	4	0.192	48.997	9435					0.047
	5	0.519	132.425	25500					0.483
	6	0.042	10.594	2040					0.026
	7	0.005	1.324	255					0.436
	8	0.28	71.51	13770					0.036
	9	0.047	11.918	2295					0.114
	10	0.005	1.324	255					0.01
	11	0.016	3.973	765					0.291
	12	0.047	11.918	2295					0.306
									0.01
	1	0.483	121.188	24080					0.057
	2	0.026	6.621	1275					0.342
	3	0.436	119.27	21785					0.244
	4	0.036	9.27	1785					0.499
	5	0.114	29.134	5610					0.405
	6	0.01	2.649	510					0.099
	7	0.291	74.158	14280					0.068
	8	0.306	76.807	14790					0.047
	9	0.01	2.649	510					0.239
	10	0.057	14.567	2805					0.083
	11	0.342	90.594	14040					0.078
	12	0.244	62.24	11985					0.401
	13	0.499	125.161	24845					0.021
	14	0.405	101.324	22255
	15	0.099	25.161	4845
	16	0.068	17.215	3315
	17	0.047	11.918	2295
	18	0.239	60.916	11730
	19	0.083	21.188	4080
	20	0.078	19.864	3825
	21	0.401	102.649	22510
	22	0.021	5.297	1020

## Sheet: mNG-Cdc15-22A
	Number	Area	Int Den	Raw Int Den			# Condensates per cell	Area (micron ^2)
	1	0.14	35.755	6885			6	0.14
	2	0.042	10.594	2040			5	0.042
	3	0.083	21.188	4080			6	0.083
	4	0.021	5.297	1020			7	0.021
	5	0.374	94.022	18105			12	0.374
	6	0.031	7.946	1530			12	0.031
							7	0.099
	1	0.099	25.161	4845			11	0.221
	2	0.221	35.297	11020			5	0.036
	3	0.036	9.27	1785			11	0.062
	4	0.062	15.891	3060			13	0.358
	5	0.358	91.373	17595				0.026
								0.005
	6	0.026	6.621	1275				0.436
	7	0.005	1.324	255				0.415
	8	0.436	119.27	21785				0.239
	9	0.415	104.616	20145				0.093
	10	0.239	60.916	11730				0.057
	11	0.093	23.837	4590				0.383
								0.042
	1	0.057	14.567	2805				0.177
	2	0.383	21.188	4080				0.447
	3	0.042	10.594	2040				0.052
	4	0.177	45.025	8670				0.016
	5	0.447	141.918	24295				0.005
	6	0.052	13.243	2550				0.062
	7	0.016	3.973	765				0.099
								0.01
	1	0.005	1.324	255				0.057
	2	0.062	15.891	3060				0.01
	3	0.099	25.161	4845				0.083
	4	0.01	2.649	510				0.326
	5	0.057	14.567	2805				0.342
	6	0.01	2.649	510				0.026
	7	0.083	21.188	4080				0.021
	8	0.326	106.621	14275				0.005
	9	0.342	125.594	22040				0.016
	10	0.026	6.621	1275				0.036
	11	0.021	5.297	1020				0.031
	12	0.005	1.324	255				0.026
								0.062
	1	0.016	3.973	765				0.431
	2	0.036	9.27	1785				0.005
	3	0.031	7.946	1530				0.104
	4	0.026	6.621	1275				0.073
	5	0.062	15.891	3060				0.026
	6	0.431	109.913	21165				0.01
	7	0.005	1.324	255				0.01
	8	0.104	26.485	5100				0.119
	9	0.073	18.54	3570				0.01
	10	0.026	6.621	1275				0.213
	11	0.01	2.649	510				0.114
	12	0.01	2.649	510				0.01
								0.016
	1	0.119	30.458	5865				0.042
	2	0.01	2.649	510				0.125
	3	0.213	54.294	10455				0.099
	4	0.114	29.134	5610				0.036
	5	0.01	2.649	510				0.052
	6	0.016	3.973	765				0.047
	7	0.042	10.594	2040				0.005
								0.104
	1	0.125	31.782	6120				0.047
	2	0.099	25.161	4845				0.047
	3	0.036	9.27	1785				0.036
	4	0.052	13.243	2550				0.026
	5	0.047	11.918	2295				0.057
	6	0.005	1.324	255				0.01
	7	0.104	26.485	5100				0.01
	8	0.047	11.918	2295				0.026
	9	0.047	11.918	2295				0.244
	10	0.036	9.27	1785				0.021
	11	0.026	6.621	1275				0.208
								0.026
	1	0.057	14.567	2805				0.021
	2	0.01	2.649	510				0.016
	3	0.01	2.649	510				0.042
	4	0.026	6.621	1275				0.005
	5	0.244	62.24	11985				0.093
								0.042
	1	0.021	5.297	1020				0.016
	2	0.208	52.97	10200				0.01
	3	0.026	6.621	1275				0.047
	4	0.021	5.297	1020				0.016
	5	0.016	3.973	765				0.026
	6	0.042	10.594	2040				0.005
	7	0.005	1.324	255				0.057
	8	0.093	23.837	4590				0.083
	9	0.042	10.594	2040				0.016
	10	0.016	3.973	765				0.088
	11	0.01	2.649	510				0.145
								0.826
	1	0.047	11.918	2295				0.042
	2	0.016	3.973	765				0.016
	3	0.026	6.621	1275				0.042
	4	0.005	1.324	255
	5	0.057	14.567	2805
	6	0.083	21.188	4080
	7	0.016	3.973	765
	8	0.088	22.512	4335
	9	0.145	37.079	7140
	10	0.826	210.556	40545
	11	0.042	10.594	2040
	12	0.016	3.973	765
	13	0.042	10.594	2040

## Sheet: mNG-Cdc15-WT
	Number	Area	Int Den	Raw Int Den			# Condensates per cell		Area (micron ^2)
	1	0.021	5.297	1020			4		0.021
	2	0.005	1.324	255			5		0.005
	3	0.01	2.649	510			2		0.01
	4	0.036	9.27	1785			2		0.036
							3		0.01
	1	0.01	2.649	510			5		0.005
	2	0.005	1.324	255			3		0.005
	3	0.005	1.324	255			4		0.011
	4	0.011	5.297	1020			4		0.01
	5	0.01	2.649	510			3		0.01
									0.016
	1	0.01	2.649	510					0.012
	2	0.016	3.973	765					0.026
									0.016
	1	0.012	5.891	3060					0.031
	2	0.026	6.621	1275					0.021
									0.016
	1	0.016	3.973	765					0.01
	2	0.031	7.946	1530					0.016
	3	0.021	5.297	1020					0.005
									0.01
	1	0.016	3.973	765					0.005
	2	0.01	2.649	510					0.007
	3	0.016	9.27	1785					0.01
	4	0.005	1.324	255					0.005
	5	0.01	2.649	510					0.006
									0.042
	1	0.005	1.324	255					0.016
	2	0.007	1.918	295					0.008
	3	0.01	2.649	510					0.028
									0.01
	1	0.005	1.324	255					0.052
	2	0.006	1.27	785					0.021
	3	0.042	11.891	2060					0.016
	4	0.016	3.973	765					0.016
	1	0.008	1.864	325
	2	0.028	7.512	4335
	3	0.01	2.649	510
	4	0.052	13.243	2550
	1	0.021	5.297	1020
	2	0.016	3.973	765
	3	0.016	3.973	765
