# Supplementary material for: Multiple polarity kinases inhibit phase separation of F-BAR protein Cdc15 and antagonize cytokinetic ring assembly in fission yeast
Source: eLife. 2023 Feb 7;12:e83062. doi: 10.7554/eLife.83062 (PMC9904764; doi:10.7554/eLife.83062)
Supplement: Figure 1—source data 1. [file elife-83062-fig1-data1.zip]

Archive with 34 entries (33 files):
- Figure 1/
- Figure 1/1A-anti Cdc15.tif
- __MACOSX/Figure 1/._1A-anti Cdc15.tif
- Figure 1/._1A-anti Cdc15.tif
- Figure 1/1B-anti Cdc15.tif
- __MACOSX/Figure 1/._1B-anti Cdc15.tif
- Figure 1/._1B-anti Cdc15.tif
- Figure 1/1B-anti tubulin.tif
- __MACOSX/Figure 1/._1B-anti tubulin.tif
- Figure 1/._1B-anti tubulin.tif
- Figure 1/1C-anti Cdc15.tif
- __MACOSX/Figure 1/._1C-anti Cdc15.tif
- Figure 1/._1C-anti Cdc15.tif
- Figure 1/1D-anti Cdc15.tif
- __MACOSX/Figure 1/._1D-anti Cdc15.tif
- Figure 1/._1D-anti Cdc15.tif
- Figure 1/1E-anti Cdc15.tif
- __MACOSX/Figure 1/._1E-anti Cdc15.tif
- Figure 1/._1E-anti Cdc15.tif
- Figure 1/1F-anti Cdc15.tif
- __MACOSX/Figure 1/._1F-anti Cdc15.tif
- Figure 1/._1F-anti Cdc15.tif
- Figure 1/1G-anti Cdc15 (Bottom left).tif
- __MACOSX/Figure 1/._1G-anti Cdc15 (Bottom left).tif
- Figure 1/._1G-anti Cdc15 (Bottom left).tif
- Figure 1/1H-anti Cdc15.tif
- __MACOSX/Figure 1/._1H-anti Cdc15.tif
- Figure 1/._1H-anti Cdc15.tif
- Figure 1/1I-anti Cdc15.tif
- __MACOSX/Figure 1/._1I-anti Cdc15.tif
- Figure 1/._1I-anti Cdc15.tif
- Figure 1/Figure 1-Source file labeled.pdf
- __MACOSX/Figure 1/._Figure 1-Source file labeled.pdf
- Figure 1/._Figure 1-Source file labeled.pdf
