# Supplementary material for: Multiple polarity kinases inhibit phase separation of F-BAR protein Cdc15 and antagonize cytokinetic ring assembly in fission yeast
Source: eLife. 2023 Feb 7;12:e83062. doi: 10.7554/eLife.83062 (PMC9904764; doi:10.7554/eLife.83062)
Supplement: Figure 3—source data 1. [file elife-83062-fig3-data1.zip]

Archive with 28 entries (27 files):
- Figure 3-new source files/
- Figure 3-new source files/._Figure 3D-wt and 1A-Coomassie.tif
- Figure 3-new source files/._Figure 3F-Anti Cdc15_nda3_cps1_31A.tif
- Figure 3-new source files/Figure 3D-wt and 1A_p32.tif
- __MACOSX/Figure 3-new source files/._Figure 3D-wt and 1A_p32.tif
- Figure 3-new source files/Figure 3C-wt and 11A-p32.tif
- __MACOSX/Figure 3-new source files/._Figure 3C-wt and 11A-p32.tif
- Figure 3-new source files/._Figure 3C-wt and 11A-p32.tif
- Figure 3-new source files/Figure 3B-wt and 5A_replicates- Coomassie stain.tif
- __MACOSX/Figure 3-new source files/._Figure 3B-wt and 5A_replicates- Coomassie stain.tif
- Figure 3-new source files/Figure 3B-wt and 5A_replicates_p32.tif
- __MACOSX/Figure 3-new source files/._Figure 3B-wt and 5A_replicates_p32.tif
- Figure 3-new source files/._Figure 3B-wt and 5A_replicates_p32.tif
- Figure 3-new source files/._Figure 3B-wt and 5A_replicates- Coomassie stain.tif
- Figure 3-new source files/Figure 3-Source file-labeled.pdf
- __MACOSX/Figure 3-new source files/._Figure 3-Source file-labeled.pdf
- Figure 3-new source files/Figure 3C-wt and 11A-Coomassie stain.tif
- __MACOSX/Figure 3-new source files/._Figure 3C-wt and 11A-Coomassie stain.tif
- Figure 3-new source files/._Figure 3C-wt and 11A-Coomassie stain.tif
- Figure 3-new source files/._Figure 3-Source file-labeled.pdf
- Figure 3-new source files/._Figure 3D-wt and 1A_p32.tif
- Figure 3-new source files/Figure 3D-wt and 1A-Coomassie.tif
- __MACOSX/Figure 3-new source files/._Figure 3D-wt and 1A-Coomassie.tif
- Figure 3-new source files/Figure 3E-Anti Cdc15-wt and 31A.tif
- __MACOSX/Figure 3-new source files/._Figure 3E-Anti Cdc15-wt and 31A.tif
- Figure 3-new source files/._Figure 3E-Anti Cdc15-wt and 31A.tif
- Figure 3-new source files/Figure 3F-Anti Cdc15_nda3_cps1_31A.tif
- __MACOSX/Figure 3-new source files/._Figure 3F-Anti Cdc15_nda3_cps1_31A.tif
