# Supplementary material for: Multiple polarity kinases inhibit phase separation of F-BAR protein Cdc15 and antagonize cytokinetic ring assembly in fission yeast
Source: eLife. 2023 Feb 7;12:e83062. doi: 10.7554/eLife.83062 (PMC9904764; doi:10.7554/eLife.83062)
Supplement: Supplementary file 2. [file elife-83062-supp2.xlsx]

## Sheet: DNA oligo and peptide list
Figure 1 and Figure 5A
Name	Sequence (5'-3')
kin1F220G check F	GGGGAAAGTTAAAGTTGCGC
kin1F220G check R1	GATCTCTGTGCACCACAGAG
kin1F220G check R2	GTCAGCTGAATTAGGCCCGG
shk1M460A check F	CCCACCTCTGCTACAAGCTC
shk1M460A check R	GGAGATGCTGTAAGCCTTCC
pck1M774G check F	GGCAAGGTTATGTTGGCTG
pck1M774G check R	CAATAACGAAACCGCATCCGC
pom1T778G check F	CATATGCAAGCTCTCGTCG
pom1T778G check R	GGGGGTCTCGCAAATTTC
Figure 3 and Figure 3-figure supplementary 1-3
Name	Sequence (5'-3')
S490A F	CGACATGGACACGGGGCTCAAACTAGTTTGG
S490A R	CCAAACTAGTTTGAGCCCCGTGTCCATGTCG
S719A F	GCGCCCAAGCTTTGAGAGGGCTGCATCTTCTCTTAGTGTACGCC
S719A R	GGCGTACACTAAGAGAAGATGCAGCCCTCTCAAAGCTTGGGCGC
S721A F	CCCAAGCTTTGAGAGGTCTGCAGCTTCTCTTAGTGTACGCCAATC
S721A R	GATTGGCGTACACTAAGAGAAGCTGCAGACCTCTCAAAGCTTGGG
S719A + S721A F	CCTTGCGCCCAAGCTTTGAGAGGGCTGCAGCTTCTCTTAGTGTACGCCAATC
S719A + S721A R	GATTGGCGTACACTAAGAGAAGCTGCAGCCCTCTCAAAGCTTGGGCGCAAGG
S763A only F	CGTTGTATGGTGAGTACAACAAAGCTCAACCTCAGTTGTCTATGC
S763A only R	GCATAGACAACTGAGGTTGAGCTTTGTTGTACTCACCATACAACG
S605A F	GTTCGTCAATGAGAAGACGCCAAGCGACATCAGTTGACGATGAAGCGC
S605A R	GCGCTTCATCGTCAACTGATGTCGCTTGGCGTCTTCTCATTGACGAAC
T635A F	GGGCTATCACTCTCGAAATGCTTCTATAGCTAGTGATATAG
T635A R	CTATATCACTAGCTATAGAAGCATTTCGAGAGTGATAGCCC
S636A F	GGGCTATCACTCTCGAAATACTGCTATAGCTAGTGATATAGATG
S636A R	CATCTATATCACTAGCTATAGCAGTATTTCGAGAGTGATAGCCC
T635A+S636A F	GGGCTATCACTCTCGAAATGCTGCTATAGCTAGTGATATAGATGG
T635A+S636A R	CCATCTATATCACTAGCTATAGCAGCATTTCGAGAGTGATAGCCC
S666A F	CTTCTGCTCAAATGCAACGCATGGCTAATAGTTTTGCTTCCCAAAC
S666A R	GTTTGGGAAGCAAAACTATTAGCCATGCGTTGCATTTGAGCAGAAG
S666A+S668A F	CTGCTCAAATGCAACGCATGGCTAATGCTTTTGCTTCCCAAACAAAGCAG
S666A+S668A R	CTGCTTTGTTTGGGAAGCAAAAGCATTAGCCATGCGTTGCATTTGAGCAG
S693A F	GCTAGAGAATCCCTTCGTCATGCTCGAAGCAATATGAGTAGATCTC
S693A R	GAGATCTACTCATATTGCTTCGAGCATGACGAAGGGATTCTCTAGC
S710A F	CTCCAATGTTATCGAGAAGAAGCGCCACCTTGCGCCCAAGCTTTG
S710A R	CAAAGCTTGGGCGCAAGGTGGCGCTTCTTCTCGATAACATTGGAG
S724A F	CAAGCTTTGAGAGGTCTGCATCTTCTCTTgcTGTACGCCAATCTGATGTCGTTTC
S724A R	GAAACGACATCAGATTGGCGTACAgcAAGAGAAGATGCAGACCTCTCAAAGCTTG
S785A F	GTTAGGCCCTAATCGTAGATCGGCATCAGTCTTACAGTCACAGAAATC
S785A R	GATTTCTGTGACTGTAAGACTGATGCCGATCTACGATTAGGGCCTAAC
S786A F	GGCCCTAATCGTAGATCGTCAGCAGTCTTACAGTCACAGAAATC
S786A R	GATTTCTGTGACTGTAAGACTGCTGACGATCTACGATTAGGGCC
S785A +S786A F	GTTAGGCCCTAATCGTAGATCGGCAGCAGTCTTACAGTCACAGAAATC
S785A+ S786A R	GATTTCTGTGACTGTAAGACTGCTGCCGATCTACGATTAGGGCCTAAC
S848A F	CCAGAGCCGACTAATAGAAATGCTGTTCAAGCAAAGAATGTCGATCCACGAG
S848A R	CTCGTGGATCGACATTCTTTGCTTGAACAGCATTTCTATTAGTCGGCTCTGG
S668A For	GCTCAAATGCAACGCATGAGTAATGCTTTTGCTTCCCAAACAAAGCAG
S668A Rev	CTGCTTTGTTTGGGAAGCAAAAGCATTACTCATGCGTTGCATTTGAGC
mNG-pIRT2 F	CATTTTGTTCTTTCAAATTGTTTCATATGGTGAGCAAGGGCGAGGAGGATAAC
31A gblock F	GGCGGCTCTGGCGGCGGCGGCTCTGGCCATATGGAGGTTAATGGAGTCTCTC
31A gblock R	CTAGAAAAGAGGGTAATCAGTGTGGATCCCTATACCGTCTGAACAAAGTTCGACGGG
mNGlinker R	GATTGAGAGACTCCATTAACCTCCATATGGCCAGAGCCGCCGCCGCCAGAGCCGC
cdc1531A gblock (2899 bp)	CCAACAACAAATCACAAATTTTGCTGCATTTTGTTCTTTCAAATTGTTTCATATGGAGGTTAATGGAGTCTCTCAATCTGAAGCGGCTCC
	GTACGTTACCAAATCTTCTGTTAAGTTCCGCGATAATTTCTGGGGATCTGAAGATGCGGGTATGGATGCTCTTATGTCCCGAACAAAAGC
	TTCTCTTTCCGTATTAGAATCAATTGATGAATTTTACGCAAAGCGTGCTTCTATTGAGCGTGAGTACGCATCTAAACTGCAAGAGTTAGCTGC
	CAGCTCAGCAGACATCCCAGAAGTTGGATCAACTTTAAATAATATTTTATCTATGAGAACTGAAACAGGGAGTATGGCCAAAGCGCATGA
	AGAAGTCTCACAACAGATAAATACCGAATTGCGAAATAAAATTCGCGAGTACATTGATCAGACGGAGCAACAGAAAGTTGTTGCAGCCA
	ATGCCATTGAGGAATTATATCAGAAAAAAACGGCTCTCGAAATAGACTTATCCGAGAAGAAGGATGCCTACGAGTACAGTTGTAACAAG
	CTGAATAGCTACATGAGACAGACAAAAAAGATGACTGGTCGTGAATTAGACAAATACAATTTAAAAATCCGTCAAGCAGCGCTAGCAGTA
	AAAAAAATGGATGCGGAATACAGAGAAACAAACGAATTACTTCTTACAGTTACTCGGGAATGGATTGATCGTTGGACAGAGGTCTGTGAT
	GCTTTTCAACATATTGAGGAATATCGTTTAGAGTTTCTCAAAACAAACATGTGGGCCTATGCAAATATAATATCTACTGCTTGTGTAAAAGA
	TGATGAATCTTGTGAAAAGATTCGACTCACACTCGAAAACACTAACATTGATGAAGATATTACTCAAATGATTCAAAACGAAGGTACCGG
	AACTACAATTCCCCCTTTACCCGAGTTTAATGACTATTTCAAAGAAAACGGATTAAATTATGACATCGACCAGCTCATTTCTAAAGCTCCT
	TCTTATCCATACTCCTCTTCGCGTCCCTCAGCTTCTGCATCTTTGGCAAGTTCGCCAACACGTAGCGCTTTTCGCCCCAAAACTAGTGAAA
	CAGTTTCATCGGAAGTTGTATCATCACCACCTACTTCACCATTGCATTCACCAGTTAAGCCAGTGTCTAATGAACAAGTTGAACAAGTTAC
	AGAGGTTGAACTTTCTATTCCCGTTCCTTCTATACAAGAAGCTGAATCCCAGAAACCAGTACTTACAGGGAGCTCAATGCGTCGACCTGCT
	GTAACATCACCAACTTTTGAAGTAGCTGCTCGTCCTTTGGCTTCAATGGATGTTAGATCCTCTCATAATGCCGAGACTGAGGTACAGGCTA
	TACCCGCTGCAACAGATATATCACCCGAAGTTAAGGAAGGTAAAAATAGTGAGAATGCTATCACGAAAGATAATGATGATATTATTTTGA
	GTAGTCAACTTCAACCTACTGCTACCGGAAGTCGGTCATCTAGGTTGTCTTTCTCTCGACATGGACACGGGGCTCAAGCTAGTTTGGGATC
	TATCAAACGAAAATCAATAATGGAGCGTATGGGGAGACCCACTGCTCCCTTCATGGGTTCTAGTTTCTCTAATATGGGTAGCCGAAGTACC
	GCACCTACTAAAGAAGGATTTGCTAGCAATCAACATGCCACAGGCGCGTCTGTCCAGTCTGATGAGTTAGAAGATATTGACCCCAGAGC
	TAACGTTGTTTTAAACGTTGGACCCAACATGCTTTCTGTTGGAGAGGCACCAGTGGAATCCACATCCAAAGAAGAAGACAAAGATGTACC
	CGATCCCATCGCTAATGCAATGGCTGAATTAAGTTCGTCAATGAGAAGACGCCAAGCGACATCAGTTGACGATGAAGCGCCTGTTTCTC
	TTAGTAAGACGTCTTCTTCTACAAGATTAAATGGCTTGGGCTATCACTCTCGAAATGCTGCTATAGCTAGTGATATAGATGGCGTTCCCAA
	AAAGAGTACCTTAGGAGCTCCTCCAGCCGCACACACTTCTGCTCAAATGCAACGCATGGCTAATGCTTTTGCTTCCCAAACAAAGCAGG
	TGTTCGGAGAGCAACGAACCGAAAATTCAGCTAGAGAATCCCTTCGTCATGCTCGAAGCAATATGAGTAGATCTCCTGCTCCAATGTTA
	TCGAGAAGAAGCGCCACCTTGCGCCCAAGCTTTGAGAGGGCTGCAGCTTCTCTTGCTGTACGCCAATCTGACGTCGTTGCGCCAGCACC
	TTCTACAAGGGCTCGTGGGCAAGCAGTGTCTGGTCAACAAAGGCCATCTGCATCTATGTCGTTGTATGGTGAGTACAACAAAGCTCAACC
	TCAGTTGTCTATGCAACGTTCTGTTGCTCCCAATCCGTTAGGCCCTAATCGTAGATCGGCAGCAGTCTTACAGTCACAGAAATCTACTTC
	ATCTAACACATCAAACCGAAACAATGGTGGTTATAGTGGATCGAGACCAAGTGCAGAAATGGGTCACAGATATGGGGCTATGAGTGGAA
	GGTCCATGAGGCAAGTTGCCCAAAGATCCACCGCTCGCGCACGGGCACCAGAGCCGACTAATAGAAATGCCGTTCAATCAAAGAATGT
	CGATCCACGAGCTACTTTTACGGCTGAAGGAGAGCCAATTTTAGGATATGTTATCGCACTTTATGATTATCAAGCTCAAATACCTGAAGA
	AATTAGCTTCCAAAAGGGCGATACATTAATGGTTCTTCGCACACAAGAAGATGGATGGTGGGATGGTGAAATTATTAATGTTCCAAATTC
	AAAACGTGGTTTATTCCCGTCGAACTTTGTTCAGACGGTATAGGGATCCACACTGATTACCCTCTTTTCTAGATGTTTACACTTGCATTC
	TTTTTCGCGTGGTTAC
Figure 7
Name	Sequence (5'-3')
His-IDR F	caggatccgaattcgagctcggcgcgcctgcagGGCGGCGGCGGCTCTGGCGGCGGCGGCTCTGGCCATTCTTTGGCAAGTTCGCCAACACGTAGCGC
IDR_Sal1 R	cttaagcattatgcggccgcaagcttgtcgacCTATACCGTCTGAACAAAG
Peptide list
Name	Sequence
Pxl1(residues 177-188)	SKQLPTLPLQKS
Cdc12 (residues 20-40)	TPTPSARRTIGPRAPKSKTTY
