# Supplementary material for: Multiple polarity kinases inhibit phase separation of F-BAR protein Cdc15 and antagonize cytokinetic ring assembly in fission yeast
Source: eLife. 2023 Feb 7;12:e83062. doi: 10.7554/eLife.83062 (PMC9904764; doi:10.7554/eLife.83062)
Supplement: Supplementary file 3. [file elife-83062-supp3.xlsx]

## Sheet: Sheet1
	ug/ml	O.D		Avg	Blank O.D	(O.D) Background corrected											From Nanodrop
	62.5	0.976	0.966	0.971	0.593	0.378			O.D		Avg	Blank O.D	(O.D) Background corrected	ug/ml (1:10)	ug/ml	ug/ul	ug/ul
	125	1.323	1.3	1.3115		0.7185	Before addition of dye	His-IDR WT	2.65	2.5567	2.60335	0.593	2.01035	1210.59	12105.9	12.1059	~10
	250	1.644	1.678	1.661		1.068		His-IDR (W903S)	2.221	2.206	2.2135		1.6205	856.182	8561.82	8.56182	~12
	500	1.975	1.941	1.958		1.365		His-mCherry	2.098	2.111	2.1045		1.5115	757.091	7570.91	7.57091	~9
	750	2.276	2.253	2.2645		1.6715		Fic1-His	1.675	1.705	1.69		1.097	380.273	3802.73	3.80273	~2.5
	1000	2.572	2.514	2.543		1.95		Cdc15-E30K,E152K	1.839	1.597	1.718		1.125	405.727	4057.27	4.05727	~8.5
	1500	2.985	2.947	2.966		2.373
	2000	3.166	3.176	3.171		2.578
									O.D		Avg		(O.D) Background corrected	ug/ml (1:10)	ug/ml	ug/ul
							After addition of dye	His-IDR WT	2.55	2.592	2.571		1.978	1181.18	11811.8	11.8118
								His-IDR (W903S)	1.93	2.211	2.0705		1.4775	726.182	7261.82	7.26182
								His-mCherry	2.339	1.892	2.1155		1.5225	767.091	7670.91	7.67091
								Fic1-His	1.663	1.65	1.6565		1.0635	349.818	3498.18	3.49818
								Cdc15-E30K,E152K	1.897	1.444	1.6705		1.0775	362.545	3625.45	3.62545
