# Supplementary figures and images for: Multiple polarity kinases inhibit phase separation of F-BAR protein Cdc15 and antagonize cytokinetic ring assembly in fission yeast
Source: eLife journal article supplement (doi:10.7554/elife.83062), 2023-01-16

Figure 3B

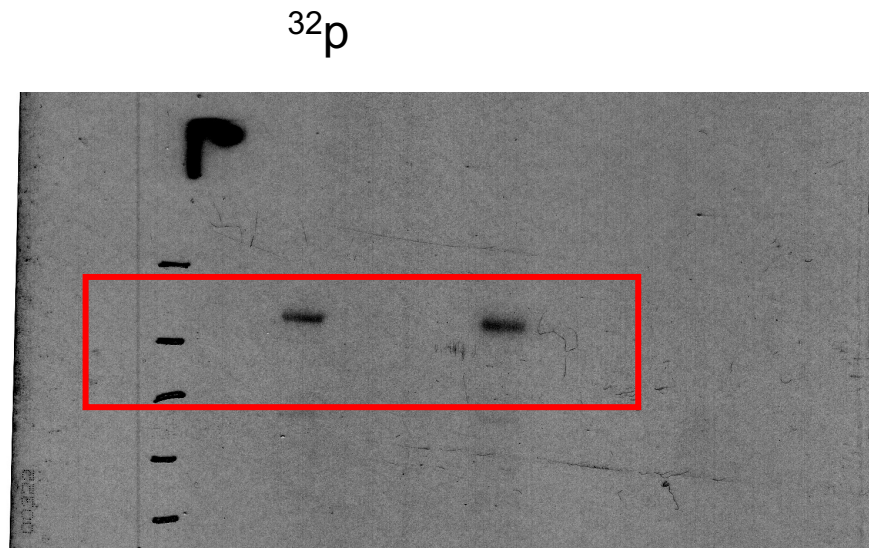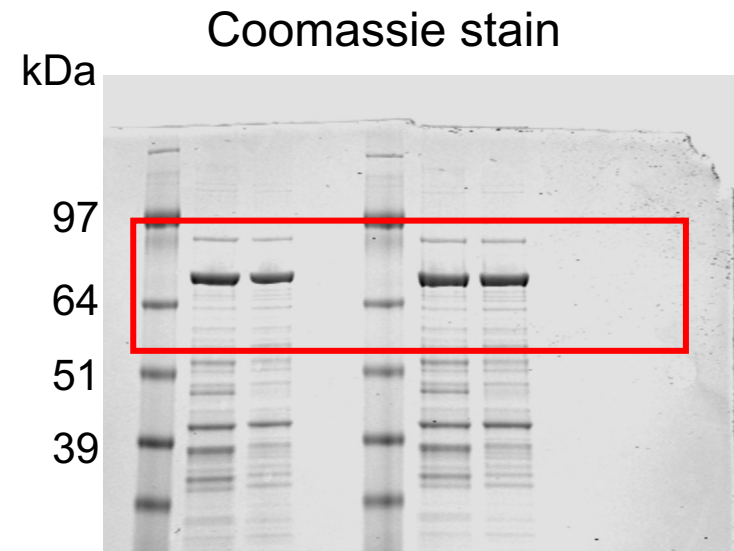

=GST-Cdc15C

Figure 3C

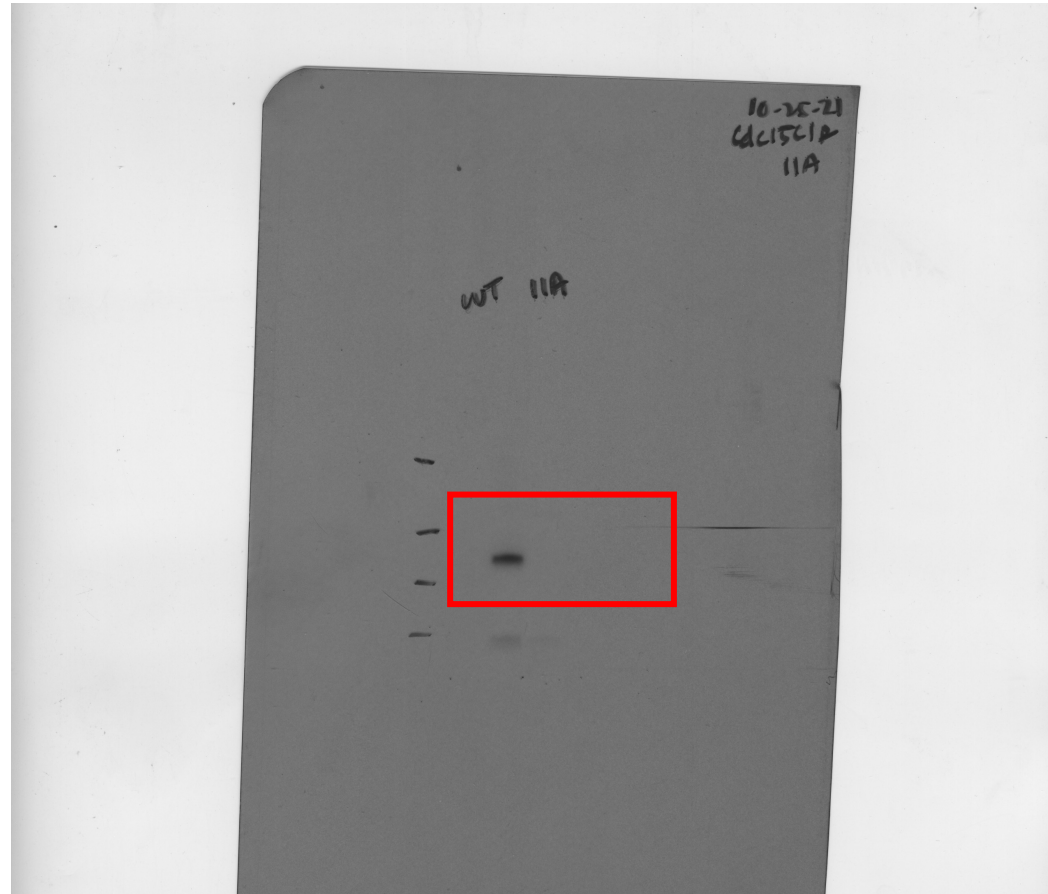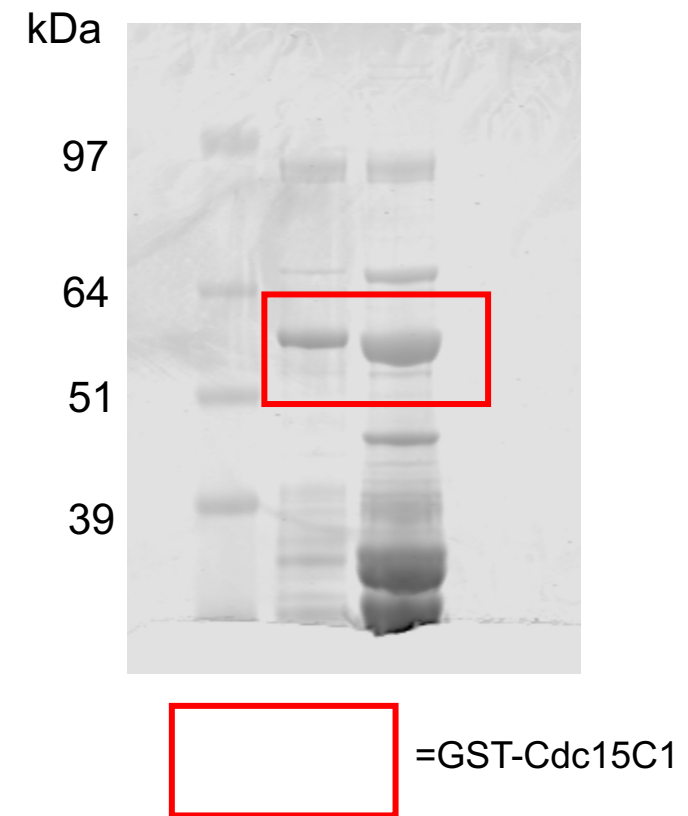

Figure 3D

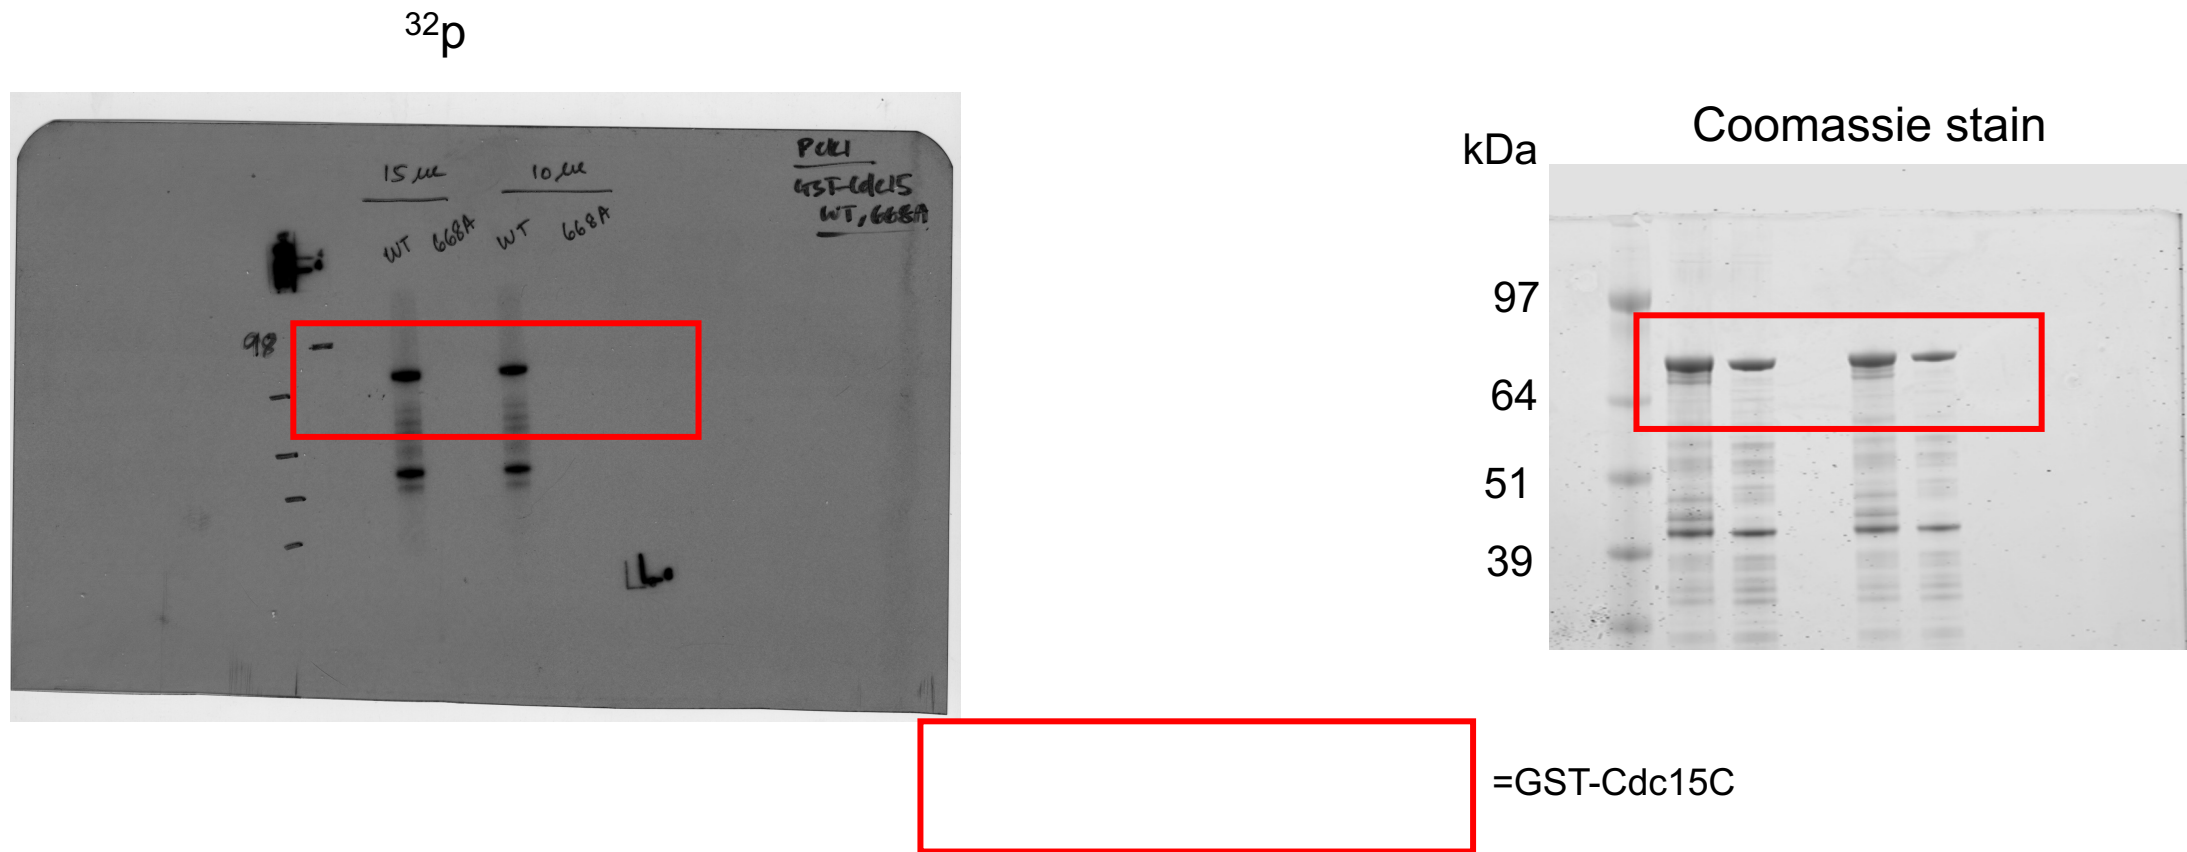

Figure 3E

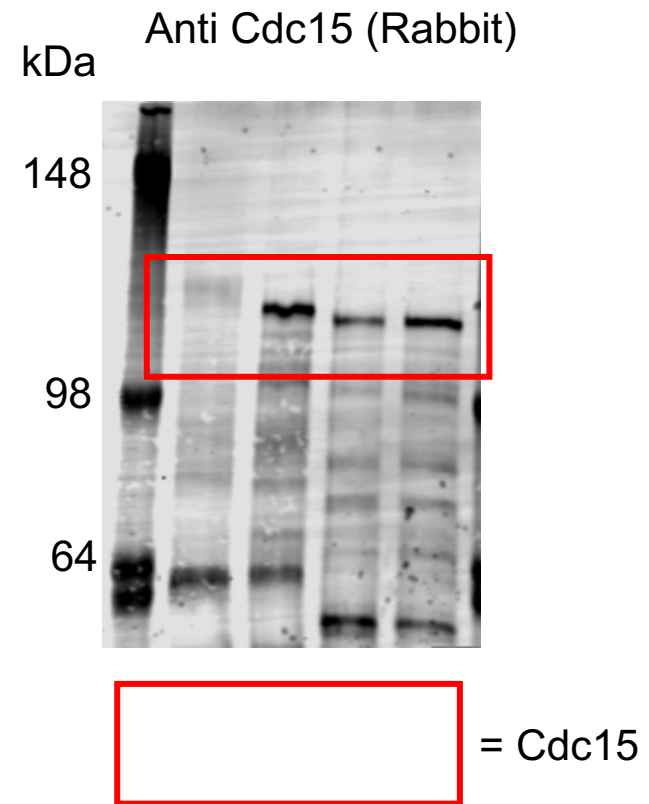

Figure 3F

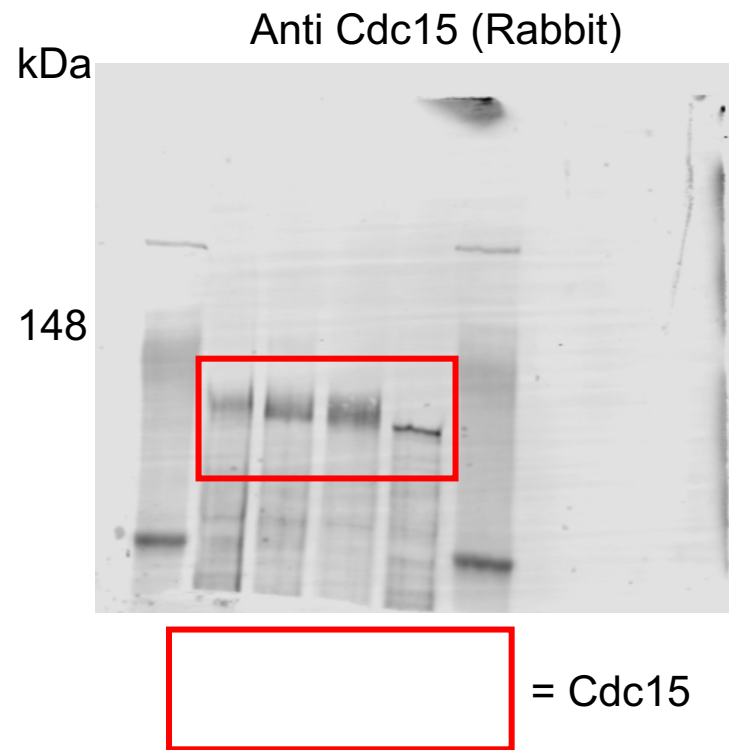

Supplement: fig3-data1 [file elife-83062-fig3-data1-v1.zip]

# Figure 9-figure supplement 1A

## Coomassie stain

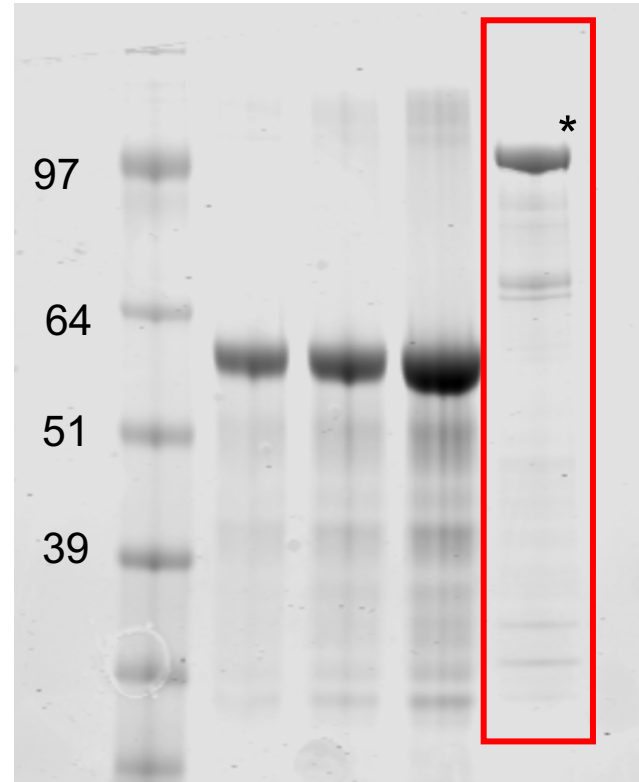

=Cdc15 (E30K, E152K)

Supplement: fig9-figsupp1-data1 [file elife-83062-fig9-figsupp1-data1-v1.zip]
